# Supplementary material for: De Novo Assembly of the Transcriptome of the Non-Model Plant Streptocarpus rexii Employing a Novel Heuristic to Recover Locus-Specific Transcript Clusters
Source: PLOS journal article supplement (doi:10.1371/journal.pone.0080961), 2013-12-06

**Supporting figure S1:** Box plots of percentages of representative transcripts corresponding to putative UTR and putative retained introns.

Figure S1a: box plot of percentage of transcripts corresponding to UTRs as estimated by parsing of Blast alignments with *A. thaliana* orthologs. Data are shown for 1896 (*Ath*) and 2904 (*S.rexii*) "confidently annotated" representative transcripts from LSTCs

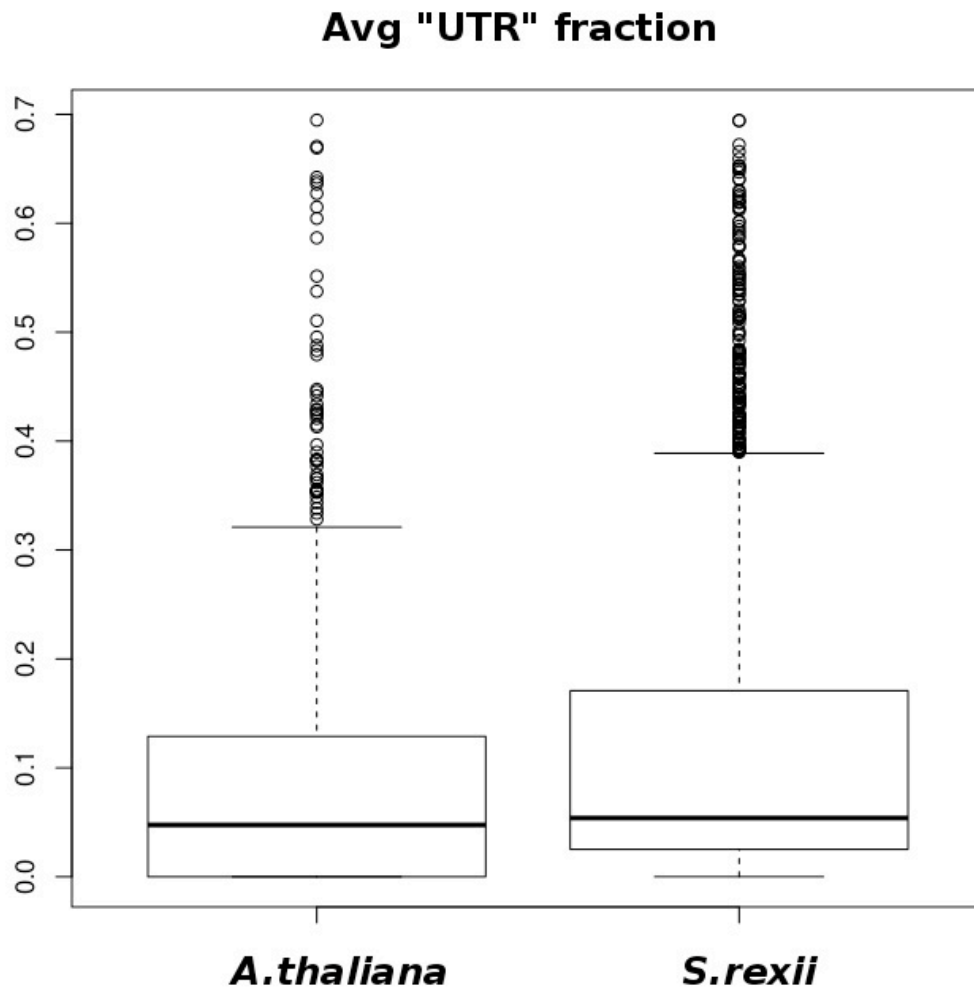

**Figure S1b:** box plot of percentage of transcripts corresponding to putative retained introns as estimated by parsing of Blast alignments with *A. thaliana* orthologs. Data are shown for 1896 (*Ath*) and 2904 (*S.rexii*) “confidently annotated” representative transcripts from LSTCs.

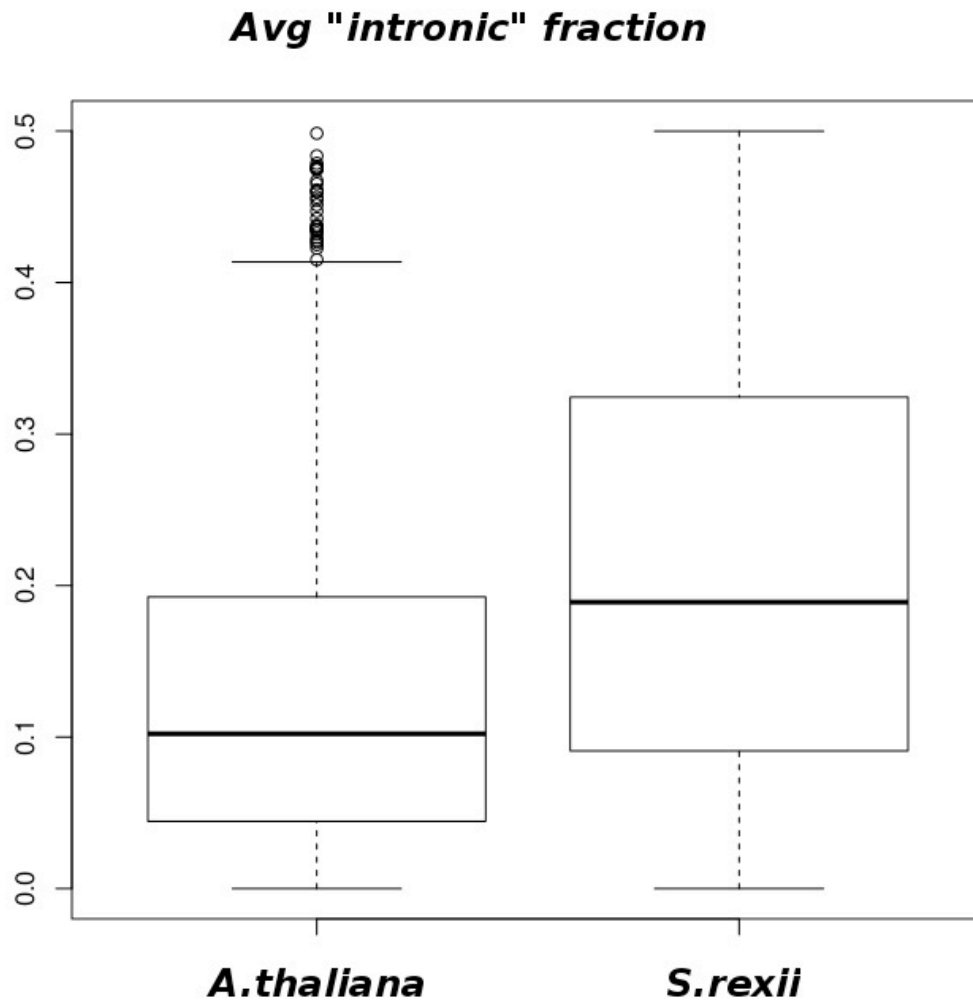

Supplement: S1 (10.1371/journal.pone.0080961.s001) [file journal.pone.0080961.s001]
