# Supplementary material for: De Novo Assembly of the Transcriptome of the Non-Model Plant Streptocarpus rexii Employing a Novel Heuristic to Recover Locus-Specific Transcript Clusters
Source: PLoS One. 2013 Dec 6;8(12):e80961. doi: 10.1371/journal.pone.0080961 (PMC3855653; doi:10.1371/journal.pone.0080961)
Supplement: Table S1 — Plaza homfam gene family sizes for a selection of completely sequenced plant genomes, and for transcriptomes reconstructed in the current study. Individual worksheets show results for complete transcriptome and gene families whose predicted dimensions either increased or decreased with the reclustering procedure described. For each worksheet, Pearson correlation coefficients for Oases loci and reclustered LSTCs are shown. (XLS) [file pone.0080961.s002.xls]

## Sheet: a.thaliana
	AL	AT	BD	CP	FV	GM	LJ	MD	ME	MT	OS	PT	RC	SB	TC	VV	ZM	At_reclustering	At_oases			AL	AT	BD	CP	FV	GM	LJ	MD	ME	MT	OS	PT	RC	SB	TC	VV	ZM
HOM000001	265	242	277	354	290	490	251	746	304	274	293	313	292	270	309	315	272	179	347		At_reclustering	0.90952	0.912455	0.830098	0.846643	0.869961	0.895846	0.90092	0.872134	0.879801	0.707123	0.78228	0.882427	0.881147	0.78223	0.834517	0.848579	0.835113
HOM000002	156	122	202	123	230	317	167	760	232	300	307	359	187	256	282	209	191	191	230		At_oases	0.872324	0.884619	0.804499	0.86462	0.848875	0.856941	0.869921	0.844882	0.840076	0.672374	0.752703	0.83943	0.868801	0.753212	0.824586	0.825843	0.795574
HOM000003	214	219	192	197	247	369	234	471	207	257	203	280	206	233	212	165	238	282	461
HOM000004	192	179	175	147	166	409	197	346	335	191	184	295	180	181	165	160	248	189	203		0.0825327
HOM000005	152	157	140	95	167	240	154	388	200	203	208	241	179	224	207	178	149	109	113
HOM000006	145	116	125	59	156	235	125	496	148	423	157	324	103	141	165	179	99	103	108
HOM000007	151	143	107	102	119	312	105	293	197	109	127	211	132	122	138	153	185	96	108
HOM000008	202	145	3	19	203	197	183	788	65	422	2	213	73	5	54	111	4	189	205
HOM000010	119	117	108	76	97	298	125	199	159	110	122	172	92	127	96	77	175	72	79
HOM000011	97	90	85	71	135	221	131	263	130	147	94	157	107	102	116	142	87	54	51
HOM000012	74	74	142	57	67	185	99	168	104	105	149	117	75	148	80	76	144	37	44
HOM000013	109	111	129	63	73	198	76	168	115	98	148	113	75	158	95	40	170	68	72
HOM000014	106	98	90	62	68	185	79	172	110	76	97	115	64	89	64	64	130	77	73
HOM000015	14	21	83	37	53	120	58	301	90	136	158	162	71	96	115	68	84	29	34
HOM000017	80	94	86	57	82	169	83	208	96	75	118	121	69	81	109	72	73	89	121
HOM000018	102	96	75	61	84	159	92	188	113	67	94	141	79	88	85	68	117	69	87
HOM000019	62	73	80	59	59	145	91	152	76	70	84	96	60	81	48	58	133	76	74
HOM000020	96	69	72	68	69	141	88	204	85	108	77	97	85	75	68	96	74	56	70
HOM000021	110	95	83	63	80	150	61	170	90	76	86	125	61	75	66	58	94	71	87
HOM000022	31	47	34	13	88	199	46	322	117	140	70	168	52	42	179	84	18	57	65
HOM000023	65	55	72	39	97	105	48	246	87	83	96	133	71	91	72	83	80	44	49
HOM000024	25	20	185	10	45	70	8	87	45	49	297	52	53	207	52	58	66	17	12
HOM000025	80	60	68	70	66	129	105	137	74	72	56	111	56	62	60	53	78	76	77
HOM000027	56	50	54	52	46	98	63	149	68	50	49	79	42	52	45	50	63	62	67
HOM000028	78	71	82	53	54	177	64	142	106	82	95	106	62	85	58	59	122	57	64
HOM000029	82	84	70	52	75	148	91	123	69	93	60	126	80	70	75	71	65	43	45
HOM000030	69	62	54	79	57	135	80	146	75	63	55	94	52	59	58	73	83	122	165
HOM000031	65	59	87	59	71	131	75	157	79	84	100	87	66	99	69	55	85	51	64
HOM000032	90	80	57	50	58	135	62	144	94	55	60	91	51	61	57	60	79	68	64
HOM000033	49	47	49	49	50	118	79	103	68	88	67	89	64	69	77	94	64	50	66
HOM000035	61	48	94	24	81	61	22	126	21	42	163	113	51	111	51	40	57	47	47
HOM000036	61	57	56	50	66	112	24	14	62	70	53	77	59	52	48	60	71	76	63
HOM000037	68	58	68	40	62	125	55	63	58	61	102	68	50	96	54	44	91	53	49
HOM000039	64	60	52	93	59	127	53	125	82	62	55	92	45	55	58	51	81	38	34
HOM000040	52	51	55	58	60	99	66	153	63	66	65	74	60	79	52	47	66	47	53
HOM000041	82	54	72	23	47	94	44	124	57	61	116	62	46	80	52	44	58	44	54
HOM000042	41	37	49	46	56	112	52	119	77	66	58	94	49	78	44	42	88	39	45
HOM000043	65	62	51	58	52	98	48	119	77	41	50	83	46	47	57	52	70	56	68
HOM000044	56	55	54	30	40	109	53	111	56	45	60	65	34	55	36	43	87	60	66
HOM000045	16	27	90	37	90	103	16	132	28	82	33	65	30	211	39	37	22	42	44
HOM000046	54	51	43	37	53	105	74	111	63	43	50	70	49	51	64	66	44	49	63
HOM000047	64	53	45	39	46	117	47	127	63	42	54	78	42	53	42	37	68	63	78
HOM000049	58	61	26	35	53	244	52	70	85	106	24	74	17	31	68	42	38	31	33
HOM000050	49	47	47	42	43	122	61	92	59	49	66	70	48	63	55	44	59	48	52
HOM000051	21	37	27	23	41	63	32	57	50	130	74	104	61	103	80	24	21	10	13
HOM000052	31	26	7	12	65	49	14	124	99	84	19	193	40	7	137	110	5	35	53
HOM000054	50	54	58	26	38	80	49	78	47	60	56	66	44	53	47	59	48	33	35
HOM000055	52	39	62	33	66	79	37	106	52	58	56	67	38	60	54	32	56	18	16
HOM000057	61	55	41	38	42	84	40	113	54	34	44	71	36	37	39	44	58	53	43
HOM000058	39	33	40	36	44	99	35	132	46	61	50	48	29	45	29	25	56	27	28
HOM000059	46	46	51	32	41	119	60	17	57	66	56	51	41	59	58	47	46	46	39
HOM000061	46	41	41	31	30	75	41	79	54	26	47	59	33	47	40	39	58	33	29
HOM000062	23	20	62	22	29	76	36	63	33	43	81	49	29	63	35	26	72	22	29
HOM000063	49	44	40	37	38	89	55	105	56	35	47	64	42	42	35	32	51	54	65
HOM000064	62	50	32	30	35	63	42	123	66	36	41	46	32	42	31	44	33	38	30
HOM000065	34	35	61	27	32	83	36	77	42	23	58	38	26	79	28	31	93	22	23
HOM000066	32	34	24	36	59	30	25	94	54	41	54	66	51	47	47	96	37	15	24
HOM000067	12	39	35	24	35	49	12	79	47	32	78	64	41	51	102	78	22	26	32
HOM000068	41	38	42	29	42	71	25	107	54	25	35	55	31	30	37	38	60	34	29
HOM000069	25	25	37	25	31	52	37	111	42	38	55	56	31	67	44	68	46	16	20
HOM000071	30	31	36	22	39	59	43	73	41	61	36	55	51	33	39	33	35	35	47
HOM000072	41	30	29	44	52	57	43	86	45	28	40	82	46	34	48	58	28	23	26
HOM000073	26	18	21	26	44	65	21	102	47	39	44	126	32	29	42	77	28	22	31
HOM000074	19	20	53	28	36	62	32	84	41	33	68	67	36	53	32	38	61	19	22
HOM000075	45	46	37	34	28	91	34	60	56	31	43	59	34	41	31	34	60	49	43
HOM000076	39	36	30	54	34	68	52	86	43	24	37	50	26	30	28	28	50	42	47
HOM000077	30	28	40	27	44	63	30	62	44	33	51	70	40	61	46	54	41	16	15
HOM000078	17	21	42	22	54	54	22	81	54	23	48	59	26	50	38	54	42	13	15
HOM000079	39	40	34	39	92	59	22	79	46	36	45	54	41	31	53	18	42	31	29
HOM000080	42	34	41	29	31	79	27	68	53	30	41	63	36	38	38	38	53	32	40
HOM000081	20	25	30	6	60	54	12	99	45	84	52	133	31	23	54	12	10	7	16
HOM000082	36	28	29	30	31	63	42	97	36	37	36	50	28	38	43	71	43	31	27
HOM000083	29	19	32	13	70	46	57	96	22	88	32	33	17	35	24	26	40	23	16
HOM000084	33	33	36	31	44	67	24	37	47	44	42	55	32	47	40	40	50	11	13
HOM000085	41	34	31	27	37	81	36	74	40	34	35	54	35	40	31	31	37	23	12
HOM000086	21	25	46	17	20	42	31	59	42	33	64	38	23	57	33	30	52	17	15
HOM000087	29	28	28	29	31	65	37	58	35	26	28	39	27	31	26	27	39	35	42
HOM000088	34	34	31	38	27	71	25	92	46	39	31	53	29	29	32	29	44	39	46
HOM000089	39	33	32	23	33	70	36	55	39	37	30	42	53	37	36	36	35	22	23
HOM000090	33	27	28	23	25	53	29	89	28	18	26	33	22	19	23	24	35	36	40
HOM000092	31	35	27	27	31	78	34	91	44	33	38	47	28	34	30	29	37	43	57
HOM000093	43	35	36	20	38	42	26	69	30	50	50	44	25	42	42	27	39	29	32
HOM000094	33	32	32	24	28	62	30	70	40	31	27	48	24	26	26	36	44	33	26
HOM000095	3	4	26	10	100	17	1	78	46	13	44	24	2	135	10	6	7	3	3
HOM000096	21	21	36	24	60	64	34	59	32	28	34	64	32	36	41	62	29	20	17
HOM000097	20	17	22	10	20	54	29	95	38	39	46	41	46	55	29	43	29	8	12
HOM000098	39	37	20	31	30	70	38	52	49	28	30	43	29	27	29	37	35	11	14
HOM000099	35	36	27	21	24	79	24	57	44	26	30	44	22	29	24	22	46	30	29
HOM000100	8	7	80	5	5	22	6	13	12	4	131	12	6	135	5	6	40	8	9
HOM000101	24	23	29	37	18	47	28	11	30	28	26	44	22	32	25	22	34	52	55
HOM000102	22	27	37	18	20	54	19	54	31	28	38	40	19	45	20	21	53	33	27
HOM000103	26	28	23	24	26	87	29	40	34	36	38	37	21	44	19	23	44	19	16
HOM000104	16	22	23	26	29	37	33	35	31	33	29	38	20	44	23	22	34	28	35
HOM000105	23	25	26	21	20	60	40	50	32	40	31	43	19	27	27	30	43	25	17
HOM000106	29	30	22	23	19	46	38	50	27	30	34	32	23	32	17	42	38	48	52
HOM000107	28	22	31	19	33	59	22	56	34	21	36	42	26	44	30	22	37	19	18
HOM000108	27	25	24	27	24	56	33	42	34	21	25	33	22	22	22	23	31	38	36
HOM000109	20	20	19	20	20	49	19	49	32	19	18	40	24	20	29	21	48	20	21
HOM000110	33	29	24	23	21	66	42	61	30	20	27	40	20	28	23	24	38	40	35
HOM000111	30	22	20	25	21	45	19	53	27	15	20	34	21	22	18	18	33	21	18
HOM000112	33	29	22	21	23	56	19	51	39	22	23	39	24	18	21	24	29	18	23
HOM000113	32	25	18	16	21	51	23	53	34	20	23	35	17	26	22	25	27	21	18
HOM000114	14	10	1	15	54	52	14	98	32	57	1	62	16	1	46	96	7	6	9
HOM000115	86	76	4	4	54	21	56	48	3	162	5	6	3	7	9	4	15	28	37
HOM000116	28	20	21	13	55	37	17	78	20	33	25	76	22	23	33	33	11	33	39
HOM000117	16	28	25	11	34	36	18	54	27	41	33	40	23	34	36	24	26	21	21
HOM000119	20	18	24	20	20	51	27	59	30	24	29	31	19	25	22	21	30	18	18
HOM000120	20	15	29	26	19	38	25	56	28	18	29	41	20	35	22	24	38	21	18
HOM000121	18	17	21	23	30	42	39	46	18	37	18	38	20	22	29	37	15	33	41
HOM000122	30	27	29	15	26	34	21	56	29	30	33	35	11	33	8	17	25	20	9
HOM000123	29	20	17	17	67	40	33	114	29	24	17	33	16	15	17	15	18	18	21
HOM000124	29	29	24	20	18	63	14	56	39	19	28	37	21	24	19	19	42	18	26
HOM000125	21	22	21	17	21	38	16	55	19	17	15	24	16	16	16	18	29	17	12
HOM000126	2	2	8	3	11	28	5	9	15	385	11	6	16	11	3	4	4	3	3
HOM000127	4	5	22	2	20	14	4	33	1	12	12	80	7	85	128	2	13	3	6
HOM000128	20	19	15	17	14	36	20	60	23	16	15	35	18	14	19	24	39	17	9
HOM000129	39	25	27	19	16	56	19	55	35	26	25	33	19	22	19	19	28	18	23
HOM000130	24	23	22	26	28	38	11	19	22	33	19	28	23	21	22	15	21	57	59
HOM000131	33	28	26	21	19	60	17	45	36	20	31	32	18	25	21	23	39	22	21
HOM000133	30	28	15	29	27	46	32	51	28	50	20	33	33	18	27	19	16	12	29
HOM000134	22	21	28	15	19	32	19	60	29	31	29	36	19	32	22	20	30	26	25
HOM000135	26	23	20	15	16	46	20	40	25	59	40	29	18	30	15	14	30	24	39
HOM000136	20	15	16	23	24	34	31	70	28	17	18	35	23	19	27	25	26	26	30
HOM000137	25	25	24	20	26	39	24	48	25	24	26	33	20	25	18	21	32	24	31
HOM000138	45	36	20	19	32	40	32	44	21	18	27	29	22	30	26	11	23	36	42
HOM000139	14	13	14	21	15	52	14	72	43	22	18	33	29	19	25	29	26	6	6
HOM000140	1	1	1	0	2	5	6	9	2	478	1	3	1	1	1	1	2	1	1
HOM000141	11	7	23	14	28	26	21	29	33	30	20	29	20	27	27	25	28	6	11
HOM000142	23	25	12	25	13	31	14	71	25	18	43	28	19	20	40	40	15	14	19
HOM000143	15	10	11	18	17	38	31	47	21	18	13	22	40	10	19	21	18	10	11
HOM000144	2	2	41	6	94	8	9	43	3	23	10	50	1	54	24	5	2	9	9
HOM000145	31	22	15	28	21	44	31	50	33	28	16	23	24	19	24	30	18	26	27
HOM000146	24	23	21	17	19	54	21	35	32	19	22	39	20	25	21	22	27	20	18
HOM000147	21	19	18	16	16	45	24	45	24	25	19	36	17	20	20	14	24	16	12
HOM000148	6	12	9	7	32	11	8	57	5	46	17	26	11	153	7	9	26	11	10
HOM000149	32	27	20	13	20	50	18	46	26	25	22	32	18	27	17	11	27	16	18
HOM000150	18	18	21	19	17	61	21	45	32	22	21	30	19	20	19	18	27	16	15
HOM000151	79	50	19	14	10	25	38	17	14	30	35	13	9	15	12	23	14	10	10
HOM000152	15	17	18	15	17	47	19	40	22	11	19	31	16	21	16	20	33	19	15
HOM000153	32	27	13	23	18	52	16	6	20	24	21	76	18	15	44	19	16	18	32
HOM000154	23	20	26	26	10	26	11	24	29	8	33	31	34	36	25	25	29	11	10
HOM000155	28	27	26	16	19	47	17	35	30	14	28	25	17	26	15	10	50	14	17
HOM000156	19	14	13	17	14	26	27	38	20	17	14	28	13	16	18	24	16	19	18
HOM000158	18	17	19	15	17	55	19	55	24	41	17	24	15	25	12	17	28	16	21
HOM000159	14	13	24	14	16	50	22	29	21	26	31	33	17	29	15	27	27	15	10
HOM000160	25	17	18	15	17	52	16	34	28	18	23	27	18	21	22	17	24	18	22
HOM000161	20	18	16	14	18	42	26	43	27	14	19	27	14	24	20	17	33	18	28
HOM000162	18	16	19	7	21	27	30	44	15	30	18	22	12	17	10	15	22	12	12
HOM000163	26	26	8	18	17	39	24	51	30	33	12	29	17	10	16	18	15	25	31
HOM000164	23	25	19	16	16	45	14	32	28	22	20	28	16	23	17	14	29	24	23
HOM000165	26	23	19	14	13	38	14	45	16	32	21	24	12	22	15	18	26	25	42
HOM000166	26	24	23	20	18	37	14	42	19	20	25	29	21	27	15	11	22	10	21
HOM000167	11	7	34	14	7	8	2	7	6	3	74	49	7	42	22	21	24	7	21
HOM000168	14	14	27	16	12	48	16	29	29	16	25	34	17	28	21	10	42	10	13
HOM000169	31	23	13	10	23	25	8	24	20	27	40	17	16	14	14	20	21	7	8
HOM000170	14	14	34	13	27	38	20	31	15	18	29	22	13	28	25	12	19	6	7
HOM000171	18	17	19	16	15	31	21	23	27	12	20	32	17	17	19	16	25	15	17
HOM000172	26	22	19	12	16	32	21	36	19	14	20	24	15	18	21	20	23	16	15
HOM000173	20	17	14	23	22	39	14	48	24	19	13	28	16	15	23	20	16	14	17
HOM000174	14	14	20	19	15	42	20	31	20	15	20	32	17	19	20	19	27	19	15
HOM000175	22	13	13	11	12	26	15	41	20	31	15	18	12	23	13	15	29	13	9
HOM000176	24	21	18	19	13	39	20	28	23	24	14	24	20	20	20	15	20	18	16
HOM000178	22	14	13	39	13	24	29	51	24	21	17	16	10	15	17	13	23	30	46
HOM000179	18	18	15	12	14	37	27	50	19	9	18	21	12	13	14	14	35	15	14
HOM000181	6	6	11	17	20	45	27	56	19	39	16	22	14	10	26	14	13	9	11
HOM000182	47	141	0	24	9	4	2	12	12	2	0	27	12	0	111	2	0	32	68
HOM000183	19	14	14	13	14	28	16	30	15	29	19	22	15	13	13	14	20	13	12
HOM000184	6	6	21	4	6	10	6	18	8	4	12	10	5	40	7	4	197	7	5
HOM000185	33	20	31	9	10	18	16	25	15	20	26	19	12	48	14	19	18	15	14
HOM000186	24	23	20	14	15	31	19	26	15	17	19	27	15	22	18	16	29	20	24
HOM000187	21	19	16	11	17	32	15	44	21	25	15	20	12	13	18	10	33	16	11
HOM000188	23	16	20	12	11	37	14	43	21	16	23	26	12	21	14	16	31	18	17
HOM000189	12	10	10	16	20	29	33	45	24	16	15	17	13	20	16	23	17	7	7
HOM000190	10	9	17	8	23	22	9	63	15	7	18	41	16	22	18	31	21	8	9
HOM000191	44	35	10	15	19	25	15	32	17	38	12	25	14	11	10	11	18	22	21
HOM000192	20	21	18	13	18	25	8	19	19	4	24	20	28	25	21	30	13	16	10
HOM000193	16	16	8	15	20	44	10	35	20	19	15	39	19	9	30	22	9	17	21
HOM000194	19	16	17	18	15	31	24	38	25	14	22	25	15	21	16	16	23	22	29
HOM000196	23	21	17	23	11	36	17	20	15	26	20	23	12	19	14	22	26	19	19
HOM000197	14	13	17	12	15	32	19	34	21	14	20	23	12	15	16	11	26	17	11
HOM000198	21	17	17	12	14	33	18	29	20	34	19	20	11	18	11	9	26	20	21
HOM000199	27	20	13	15	12	22	18	46	17	18	17	27	17	12	17	16	14	18	31
HOM000200	11	10	18	10	20	23	17	40	13	19	21	17	13	25	20	15	31	13	17
HOM000201	16	14	9	11	13	29	12	24	16	11	16	17	11	11	10	12	13	12	13
HOM000202	12	10	14	12	9	22	31	38	17	16	15	20	16	9	10	15	17	10	9
HOM000203	21	21	11	10	18	24	14	24	29	22	19	29	20	14	17	17	15	17	18
HOM000204	15	13	15	24	16	21	14	27	18	18	15	15	13	20	14	12	23	30	35
HOM000205	15	23	22	8	10	36	16	18	18	21	32	15	14	24	22	6	29	17	14
HOM000207	15	18	23	2	12	10	8	19	14	22	36	39	27	18	33	19	5	11	13
HOM000208	13	11	17	12	14	28	8	40	19	16	16	20	12	16	13	11	20	10	9
HOM000210	17	14	14	11	21	30	16	52	23	14	18	24	12	13	19	14	13	11	11
HOM000211	22	9	24	8	12	16	29	23	12	35	30	12	11	17	10	12	27	6	1
HOM000212	11	13	16	14	11	28	16	46	21	15	14	28	15	24	14	14	16	12	17
HOM000213	16	15	8	16	14	13	14	46	9	12	13	19	13	30	14	57	15	8	10
HOM000214	23	16	27	9	22	25	19	28	29	9	21	29	13	24	16	9	15	13	14
HOM000215	12	12	14	10	10	24	31	15	20	29	26	16	20	21	17	13	13	10	6
HOM000216	16	17	15	12	10	51	19	28	25	17	14	18	11	16	16	11	21	15	16
HOM000217	10	8	11	8	8	23	24	70	15	12	11	30	14	13	9	10	14	13	12
HOM000219	12	12	16	12	9	27	25	36	17	21	18	16	11	18	11	11	19	15	16
HOM000220	16	13	16	11	20	26	20	26	16	19	17	24	13	13	14	19	18	18	17
HOM000222	9	9	8	15	20	19	8	58	20	19	12	24	10	13	13	36	8	9	8
HOM000224	21	15	14	13	7	33	17	24	18	17	11	21	10	11	9	9	21	22	22
HOM000225	16	13	16	12	11	39	14	36	18	14	13	21	14	14	15	16	19	8	7
HOM000226	13	17	12	10	14	26	15	27	12	14	13	29	24	15	14	11	14	19	20
HOM000227	22	20	15	13	14	25	12	27	18	11	15	24	14	14	13	13	21	24	25
HOM000228	19	17	12	14	10	39	15	29	22	14	14	27	15	10	15	17	14	21	18
HOM000229	14	13	14	10	9	32	23	28	15	13	24	18	10	13	12	19	20	13	10
HOM000230	3	18	15	13	12	34	29	35	13	34	15	17	9	29	15	11	19	17	21
HOM000231	22	13	13	14	10	28	18	27	15	14	14	20	10	12	12	17	19	23	22
HOM000232	10	9	0	13	46	14	14	75	25	8	0	42	41	0	30	7	0	2	6
HOM000234	19	17	16	13	14	28	24	26	17	17	15	25	12	10	15	14	17	23	34
HOM000235	21	17	14	13	12	21	9	35	16	13	14	22	18	16	14	14	14	17	28
HOM000236	13	12	13	9	17	24	9	26	20	10	25	16	18	26	19	15	24	6	10
HOM000237	17	16	0	24	21	52	17	21	37	30	0	28	32	1	20	15	1	2	2
HOM000238	4	4	11	4	6	18	21	17	11	21	34	18	6	39	8	25	16	3	4
HOM000239	15	15	17	8	12	18	8	16	11	26	23	17	8	24	17	31	22	18	14
HOM000240	12	10	13	13	11	37	14	44	20	12	14	23	14	14	13	14	24	11	19
HOM000241	12	13	9	22	17	34	13	32	21	32	20	17	19	10	24	7	8	7	6
HOM000242	18	14	16	12	13	35	14	27	18	21	17	19	10	12	13	13	24	18	18
HOM000243	13	13	15	11	15	29	14	33	20	7	7	30	11	14	14	11	19	15	20
HOM000244	18	19	10	14	15	33	22	36	21	20	11	20	12	11	15	15	17	16	19
HOM000245	17	20	13	10	21	10	12	36	9	31	29	12	9	11	13	6	18	6	5
HOM000246	26	16	14	10	11	21	19	25	12	18	17	19	14	17	12	10	17	14	13
HOM000247	11	10	11	14	12	31	18	46	18	12	10	23	12	9	14	19	10	7	7
HOM000248	13	9	12	7	10	20	13	33	14	25	11	20	13	11	11	16	20	5	4
HOM000249	14	14	18	10	8	34	14	39	17	12	18	16	11	20	10	10	23	11	5
HOM000250	10	9	9	9	13	20	5	44	13	9	13	19	29	14	21	17	10	7	7
HOM000251	17	17	12	13	13	34	12	35	19	14	15	20	11	13	13	10	18	16	19
HOM000252	19	11	11	10	8	23	17	38	13	8	12	18	8	13	11	12	14	10	7
HOM000253	17	14	9	13	9	25	13	42	18	6	11	20	12	10	12	14	13	13	11
HOM000254	27	20	9	15	21	15	15	28	14	9	11	16	11	12	11	20	13	9	10
HOM000255	18	15	17	9	11	23	9	27	18	10	20	18	12	17	10	10	18	14	16
HOM000256	12	12	11	12	8	24	13	35	16	23	12	18	10	13	10	11	21	20	21
HOM000259	14	13	12	18	9	28	21	35	13	14	13	21	10	14	10	10	17	25	28
HOM000260	14	13	16	7	13	29	15	32	11	35	23	26	8	17	15	6	10	8	6
HOM000261	12	13	11	10	12	23	7	25	16	8	13	19	9	14	11	14	23	12	8
HOM000262	15	15	13	11	11	43	20	25	20	14	15	22	11	14	11	6	21	5	7
HOM000263	12	12	15	10	9	40	15	21	16	17	20	17	11	15	13	8	24	10	12
HOM000264	14	15	15	14	19	27	10	20	17	15	17	15	16	15	19	13	15	18	32
HOM000265	6	5	11	11	10	26	15	29	24	44	15	20	25	10	12	12	9	5	4
HOM000266	13	15	8	13	19	35	20	25	18	9	12	22	13	11	17	15	11	14	17
HOM000267	10	14	10	10	16	18	19	57	15	10	12	24	15	12	13	15	11	10	9
HOM000268	20	16	15	16	9	23	10	19	13	30	16	20	10	11	11	12	15	6	3
HOM000269	15	13	14	7	12	21	10	19	10	14	13	15	9	14	8	7	20	9	6
HOM000270	12	11	15	10	10	31	12	10	22	16	16	20	11	15	14	13	15	8	9
HOM000271	15	17	15	11	11	30	16	23	25	33	12	23	11	8	10	9	16	18	28
HOM000272	15	14	13	7	9	16	7	27	19	9	18	23	9	18	11	15	19	12	14
HOM000273	11	11	13	11	13	23	12	39	15	12	17	24	11	15	13	15	13	8	5
HOM000274	10	9	13	11	10	16	19	26	10	11	11	14	9	13	9	13	14	20	25
HOM000275	13	11	19	10	10	34	10	1	16	18	17	20	11	17	10	11	27	13	11
HOM000276	7	7	5	6	4	21	12	13	12	127	6	17	6	7	6	14	7	13	9
HOM000277	13	13	15	11	11	34	13	29	15	7	14	24	10	12	11	14	18	13	13
HOM000278	14	12	12	8	11	21	17	25	17	12	13	21	16	15	12	11	14	12	13
HOM000279	14	13	14	9	8	25	13	33	18	10	15	17	10	16	12	8	24	11	10
HOM000280	13	3	25	0	19	5	27	17	0	68	1	10	1	25	0	0	3	2	4
HOM000281	20	13	16	10	19	20	12	20	14	13	17	16	10	19	9	9	16	12	15
HOM000282	17	12	12	10	11	33	24	21	20	15	11	16	11	9	10	11	19	14	19
HOM000283	19	11	10	8	19	17	12	29	17	23	15	17	8	9	11	9	10	14	16
HOM000284	24	19	12	7	21	19	29	28	8	30	12	14	9	11	14	13	7	7	10
HOM000285	16	12	11	9	10	20	9	20	30	17	15	20	13	15	12	12	14	9	9
HOM000286	6	16	1	112	8	27	16	23	6	23	4	5	4	10	16	1	4	4	4
HOM000288	10	18	12	13	9	24	20	14	14	13	9	25	13	11	15	15	13	24	26
HOM000289	13	13	9	9	8	22	9	17	11	19	12	15	9	12	9	9	9	9	8
HOM000290	15	13	24	3	23	2	45	41	3	29	20	8	6	18	3	1	5	1	2
HOM000291	19	20	9	10	9	26	12	21	13	11	16	14	10	16	21	9	13	14	20
HOM000292	13	15	13	13	12	18	7	18	22	9	13	19	14	12	15	15	16	12	7
HOM000293	16	12	10	13	16	26	7	50	16	12	10	19	11	9	16	9	17	14	11
HOM000294	12	9	8	12	10	25	16	33	15	9	12	16	9	9	13	15	14	9	6
HOM000295	13	11	12	12	12	25	18	24	19	14	11	13	11	11	8	9	15	12	9
HOM000296	6	6	13	5	12	22	16	36	9	27	11	16	12	21	16	14	18	6	6
HOM000297	17	13	11	10	12	35	18	25	16	20	11	15	12	11	8	10	14	15	16
HOM000298	8	8	12	10	12	33	13	32	17	8	15	23	8	10	9	12	16	10	7
HOM000299	10	6	5	5	5	18	16	14	10	10	7	11	23	3	5	9	9	8	10
HOM000300	14	14	11	10	11	33	13	24	16	14	11	16	9	12	12	9	18	12	14
HOM000301	8	7	2	4	54	19	8	67	3	27	1	10	4	3	3	16	2	8	8
HOM000302	17	15	6	13	10	37	11	27	18	23	8	21	14	10	16	14	7	8	9
HOM000303	17	16	12	12	11	31	9	22	16	12	15	18	9	10	11	13	20	15	16
HOM000304	10	7	13	7	10	11	8	41	17	3	12	27	9	10	16	12	13	5	5
HOM000305	14	10	17	5	10	27	10	20	15	10	20	15	11	22	8	5	26	6	8
HOM000306	15	14	13	7	10	25	16	27	12	7	18	13	6	16	8	9	20	19	21
HOM000307	14	12	12	7	8	26	11	19	17	16	14	25	10	20	13	7	19	8	8
HOM000308	20	17	17	8	10	22	7	25	20	8	10	14	13	15	12	7	22	29	27
HOM000309	16	9	21	11	14	15	16	24	9	9	12	10	9	12	7	8	12	9	8
HOM000310	19	15	12	7	11	23	9	20	12	11	17	16	8	17	10	7	22	12	10
HOM000311	10	10	9	14	19	24	11	29	18	15	6	21	10	14	11	15	16	5	5
HOM000312	12	11	6	11	15	30	11	34	17	16	10	15	13	8	15	12	8	11	10
HOM000314	5	12	11	9	11	25	19	36	14	6	11	16	9	14	9	13	17	13	15
HOM000315	13	13	9	11	9	23	12	17	14	11	12	21	13	9	15	10	11	8	9
HOM000316	12	11	11	9	9	22	10	43	9	16	13	14	7	9	11	7	11	10	9
HOM000317	11	10	10	12	10	23	22	23	14	11	10	19	11	11	10	12	12	11	14
HOM000318	12	14	13	10	8	18	11	30	16	11	18	17	12	15	10	9	15	11	12
HOM000319	13	11	11	10	8	28	16	35	14	13	10	17	8	15	8	7	18	24	29
HOM000320	8	8	11	12	10	26	15	38	12	13	10	15	10	11	13	22	12	5	5
HOM000322	24	21	13	17	11	21	17	13	13	7	12	13	10	14	18	7	16	11	9
HOM000323	13	11	13	8	12	16	7	26	14	10	14	14	10	15	10	5	24	7	11
HOM000324	16	13	12	13	7	24	10	16	17	9	15	18	12	16	15	9	18	9	10
HOM000325	14	14	11	13	13	22	12	18	16	10	10	16	9	11	10	9	9	21	22
HOM000326	7	8	9	11	8	15	17	33	11	18	10	16	21	11	17	20	10	10	12
HOM000327	14	11	10	12	8	22	18	23	10	12	11	13	10	14	9	10	17	7	8
HOM000328	15	13	9	11	7	24	11	28	13	9	9	13	7	12	13	8	13	16	12
HOM000329	17	14	12	10	11	21	9	18	17	6	14	19	11	13	12	18	15	17	14
HOM000330	17	15	11	8	9	28	17	21	12	10	13	18	11	12	10	7	17	17	17
HOM000331	12	9	9	15	9	22	13	22	14	10	12	12	8	15	9	8	20	19	20
HOM000332	22	17	12	8	7	34	10	21	17	8	14	18	10	12	11	4	20	14	14
HOM000334	5	6	10	8	8	17	20	27	11	5	11	11	8	9	10	10	13	6	6
HOM000335	15	14	11	15	9	27	12	24	19	10	10	18	12	16	13	6	17	9	11
HOM000336	10	11	9	11	11	20	19	27	12	9	14	13	7	13	8	10	23	10	10
HOM000338	9	9	12	10	8	32	5	17	13	9	12	12	11	13	11	23	15	7	7
HOM000339	11	10	8	17	17	19	14	22	15	19	10	15	12	14	10	9	15	12	15
HOM000340	15	15	13	10	9	22	9	16	15	10	13	15	9	13	12	17	17	21	25
HOM000341	16	15	7	8	8	18	12	45	16	9	8	13	8	6	8	9	21	11	8
HOM000342	10	10	9	8	30	20	9	25	14	10	12	18	14	8	10	12	13	10	9
HOM000343	15	14	10	6	9	29	16	17	13	11	11	13	7	9	7	7	21	18	18
HOM000344	9	9	13	9	12	24	9	22	12	9	15	18	9	13	9	13	16	9	9
HOM000346	10	8	8	6	11	23	15	30	20	14	15	22	10	7	10	21	7	10	8
HOM000347	11	9	12	10	7	26	13	21	14	11	12	21	10	14	10	8	23	9	11
HOM000348	16	11	14	7	9	14	10	34	11	9	16	16	9	14	9	9	14	3	6
HOM000349	13	11	11	10	12	29	15	30	13	11	12	16	9	12	9	10	14	15	16
HOM000350	9	8	11	8	7	14	5	33	9	6	10	12	9	9	7	8	12	10	8
HOM000351	11	11	16	9	10	25	12	15	15	9	15	11	11	17	8	10	18	1	3
HOM000352	9	9	5	9	13	19	8	35	13	11	7	14	12	8	13	11	10	12	13
HOM000354	8	6	9	10	6	19	5	35	12	7	12	19	7	11	9	14	17	9	10
HOM000355	13	12	10	10	12	31	11	18	16	9	12	17	12	11	10	15	9	13	16
HOM000356	13	12	12	8	6	21	7	23	19	10	15	20	11	16	11	10	21	9	10
HOM000357	14	13	14	8	10	29	9	20	12	15	13	16	9	15	9	13	15	13	12
HOM000358	13	10	7	6	10	25	6	15	14	12	17	12	8	11	10	17	15	6	10
HOM000359	19	14	10	6	10	22	11	32	10	33	13	13	6	8	16	10	7	15	18
HOM000360	9	9	8	10	9	19	9	21	14	14	9	15	14	6	9	8	9	9	9
HOM000361	6	7	13	6	17	21	10	30	16	11	11	18	13	10	12	15	12	7	8
HOM000362	17	9	6	10	9	18	17	27	14	7	6	19	11	3	12	13	8	14	8
HOM000363	12	9	11	9	11	18	9	40	12	5	11	13	8	10	11	9	16	13	14
HOM000364	9	8	13	6	11	9	10	13	10	9	11	14	6	11	8	7	16	5	4
HOM000365	9	9	8	10	10	16	18	16	8	18	8	14	9	8	9	9	9	21	19
HOM000366	11	13	11	8	9	23	5	28	15	9	15	11	9	13	13	10	22	13	10
HOM000367	11	11	10	8	8	29	10	34	14	5	11	15	9	11	8	9	26	12	14
HOM000368	9	8	10	8	14	23	8	20	17	6	12	23	12	12	10	10	12	7	5
HOM000369	7	6	11	5	10	12	10	29	10	6	8	10	5	42	5	12	17	7	4
HOM000370	10	11	10	13	12	21	9	34	11	14	9	16	9	9	9	14	13	15	12
HOM000371	18	18	3	10	12	25	10	27	23	10	9	24	14	7	17	5	5	16	14
HOM000372	13	11	11	7	11	25	7	35	13	9	15	18	8	13	9	6	17	10	9
HOM000373	9	10	9	9	9	15	7	28	12	23	8	17	7	11	9	10	12	10	8
HOM000374	12	10	13	10	9	31	9	23	16	12	13	18	10	10	10	7	16	8	10
HOM000377	9	9	11	9	8	25	5	38	13	9	11	20	9	12	7	15	18	10	6
HOM000378	19	13	9	10	11	15	11	20	11	13	10	15	9	11	14	12	11	9	13
HOM000379	14	12	10	4	8	12	7	35	10	13	13	8	6	13	9	11	12	6	8
HOM000380	9	13	9	8	6	21	8	37	11	12	9	13	8	9	10	9	15	14	9
HOM000381	7	6	18	6	7	23	7	16	10	14	19	8	11	19	8	5	26	2	5
HOM000382	10	5	8	5	7	10	11	19	5	4	6	9	13	5	8	10	7	5	2
HOM000383	11	9	7	14	10	16	17	36	12	13	10	15	10	9	10	15	6	10	6
HOM000384	9	9	16	9	11	22	10	14	10	9	18	9	8	16	10	5	15	10	14
HOM000385	8	7	10	7	9	16	12	31	9	10	9	12	10	8	7	7	12	9	11
HOM000387	11	11	6	11	14	12	7	24	11	8	12	13	9	8	20	15	8	3	3
HOM000389	1	8	22	6	9	9	2	16	5	10	26	4	13	25	6	7	24	20	27
HOM000390	9	8	9	7	8	18	9	25	13	7	9	12	9	4	8	11	15	10	9
HOM000391	9	7	12	10	11	21	17	15	12	27	8	12	8	11	10	10	9	16	19
HOM000392	13	13	10	8	9	20	8	26	16	8	12	16	7	10	15	9	14	8	7
HOM000393	13	13	23	5	7	13	10	16	8	4	21	11	7	17	10	11	14	9	8
HOM000394	13	10	10	5	8	25	16	17	16	11	15	17	6	11	9	8	20	10	11
HOM000395	9	11	8	9	23	18	10	11	13	9	13	16	8	8	6	7	10	9	8
HOM000396	15	13	8	7	9	20	15	42	16	6	8	13	6	6	7	9	12	13	12
HOM000397	10	8	9	13	10	17	14	20	11	9	10	9	10	9	8	5	11	11	13
HOM000398	9	11	8	5	7	23	7	24	17	10	10	16	11	9	11	8	16	11	10
HOM000400	3	3	1	1	1	2	7	2	1	93	2	24	1	1	78	2	2	3	3
HOM000401	11	9	20	8	7	15	11	18	12	9	0	17	10	24	5	11	20	14	20
HOM000402	12	10	9	7	8	19	3	24	9	9	11	15	10	8	8	8	14	14	16
HOM000403	16	7	9	8	15	18	10	16	10	5	11	11	7	9	7	11	16	7	6
HOM000404	10	10	8	11	8	20	15	25	13	18	6	21	10	6	10	11	12	11	12
HOM000405	13	12	7	8	11	27	9	20	19	8	13	15	10	12	9	8	18	3	6
HOM000406	6	7	21	4	9	5	2	12	4	7	26	9	4	33	7	4	34	5	5
HOM000407	15	12	7	7	12	23	11	17	11	9	11	19	10	8	13	8	13	11	11
HOM000408	13	11	8	8	7	29	8	15	15	14	8	21	10	7	8	9	9	10	10
HOM000409	10	9	8	8	11	17	10	22	10	8	11	14	6	7	7	12	16	10	8
HOM000410	4	6	13	3	10	12	10	43	6	9	11	11	10	15	9	11	7	3	3
HOM000411	11	8	9	7	10	16	9	28	12	5	7	13	9	8	8	7	13	9	8
HOM000412	8	9	12	10	10	22	7	17	17	9	12	17	13	9	10	10	18	9	13
HOM000413	3	5	6	13	21	23	11	28	22	38	2	11	19	2	13	5	1	3	3
HOM000414	10	10	11	6	8	21	7	15	12	11	14	11	6	9	10	12	16	9	8
HOM000416	11	12	11	6	9	19	10	19	13	11	10	15	8	22	8	8	17	11	9
HOM000417	8	8	12	6	7	19	6	17	11	10	22	13	8	17	6	10	14	10	14
HOM000418	12	12	10	10	9	25	13	15	10	6	10	12	7	6	7	9	19	12	11
HOM000419	6	6	10	4	4	44	12	6	19	18	11	28	15	10	4	8	10	3	1
HOM000420	11	12	5	10	9	22	10	23	14	20	7	16	8	11	9	7	14	13	9
HOM000421	8	8	13	5	6	22	8	19	9	5	11	14	6	17	7	8	24	10	7
HOM000422	7	8	8	13	11	21	5	25	12	13	10	14	9	8	10	7	11	9	8
HOM000423	11	11	9	7	10	21	7	26	11	7	12	13	8	11	9	7	16	12	13
HOM000424	11	11	8	8	7	22	11	29	13	3	9	17	9	9	9	10	14	9	6
HOM000425	12	10	9	7	7	14	10	21	9	7	8	18	7	9	8	7	14	12	10
HOM000426	4	5	9	5	37	20	9	29	12	6	10	9	8	8	20	5	8	4	5
HOM000427	7	7	4	10	12	13	11	15	8	5	4	9	6	7	9	6	4	7	7
HOM000428	19	14	9	5	11	23	9	17	13	8	13	14	7	8	9	8	13	6	7
HOM000429	11	11	8	8	11	21	11	21	11	6	7	16	7	9	8	8	8	10	7
HOM000431	1	1	1	1	0	31	19	0	2	125	2	9	1	2	15	3	0	1	2
HOM000432	33	26	1	10	14	15	9	24	30	11	1	8	12	1	10	11	1	15	9
HOM000433	9	10	4	5	5	20	79	9	10	11	5	10	5	6	5	5	9	6	8
HOM000434	12	11	13	6	13	20	6	15	10	7	14	11	7	9	10	17	13	15	13
HOM000435	9	9	9	6	8	20	8	24	16	16	12	15	9	7	10	9	14	11	11
HOM000436	15	12	12	7	8	22	9	27	12	10	10	11	6	12	7	7	13	12	13
HOM000437	7	7	16	7	9	12	4	21	7	4	8	16	7	5	12	10	13	6	12
HOM000438	15	15	13	7	7	28	11	13	10	6	15	11	6	11	8	7	15	15	15
HOM000441	23	8	30	0	23	2	29	11	1	29	17	0	1	7	2	1	5	3	3
HOM000442	13	12	11	7	8	18	8	19	15	7	14	14	9	13	10	6	18	6	12
HOM000443	18	15	6	8	8	13	13	50	10	5	5	14	8	8	7	7	8	9	9
HOM000444	11	11	10	7	8	15	13	23	12	9	12	14	8	11	7	10	19	13	12
HOM000445	8	8	13	7	9	23	16	9	9	13	11	8	6	14	11	8	11	11	17
HOM000447	14	13	12	7	9	13	5	21	12	5	15	11	7	14	8	6	19	7	17
HOM000448	9	9	9	8	7	26	11	20	12	12	10	13	6	9	7	7	14	5	4
HOM000449	9	9	8	8	7	26	3	18	13	11	10	13	9	11	9	9	10	10	15
HOM000450	9	9	13	4	8	14	10	20	12	8	10	17	8	12	9	17	13	8	9
HOM000451	12	11	4	10	12	21	9	21	12	3	8	13	8	10	11	6	17	8	12
HOM000452	6	10	7	7	12	13	12	14	10	10	9	12	7	8	8	12	8	6	5
HOM000453	14	7	8	7	6	14	4	26	13	9	10	10	6	8	7	7	17	8	7
HOM000455	7	7	19	7	9	17	8	18	7	5	16	11	8	20	6	5	18	9	8
HOM000456	10	9	11	7	13	18	9	25	13	3	9	16	7	12	6	6	16	8	7
HOM000457	11	12	9	6	6	14	14	16	7	11	11	10	7	12	5	7	14	8	6
HOM000459	10	11	11	8	8	19	8	14	12	8	13	11	9	14	6	11	14	8	8
HOM000460	7	7	8	12	12	13	6	31	10	16	11	12	7	10	8	8	9	7	9
HOM000461	9	9	6	7	6	21	10	19	10	9	8	13	8	7	6	5	15	13	10
HOM000462	9	4	14	7	0	7	34	5	9	14	20	12	8	11	9	6	8	5	1
HOM000463	10	8	9	7	7	19	9	17	11	9	12	16	8	9	8	9	14	8	11
HOM000464	10	8	5	6	11	27	8	17	18	6	10	17	11	10	9	6	11	1	2
HOM000465	7	8	7	8	6	18	7	20	11	7	10	10	8	8	11	7	12	10	4
HOM000466	19	16	9	11	11	7	6	32	10	8	9	9	5	12	3	5	12	9	8
HOM000467	10	10	9	8	6	15	9	19	9	13	14	15	8	6	8	9	12	6	9
HOM000468	9	8	12	6	7	19	15	12	12	6	15	12	7	13	9	9	15	12	12
HOM000469	9	7	8	7	7	13	5	15	6	5	10	13	6	7	7	8	17	8	6
HOM000470	9	9	8	7	10	18	8	31	11	10	7	12	5	8	9	8	12	6	9
HOM000471	8	5	4	2	10	28	9	24	20	24	4	21	6	4	16	8	3	4	4
HOM000472	14	16	7	8	9	23	6	24	9	10	9	12	8	13	10	1	10	13	13
HOM000473	7	9	14	5	6	22	6	14	11	8	16	12	7	16	7	7	20	6	7
HOM000474	8	10	7	12	7	16	13	15	13	4	8	10	6	9	6	11	10	11	13
HOM000475	9	9	11	6	7	17	10	18	6	5	10	11	6	9	13	7	20	11	5
HOM000476	8	11	16	3	2	10	3	6	8	7	21	9	10	22	2	2	19	5	6
HOM000477	8	6	9	5	6	15	12	16	7	10	10	17	9	13	9	9	15	6	12
HOM000478	10	10	7	10	10	21	10	12	14	7	13	14	11	9	10	7	12	7	9
HOM000479	4	9	4	11	21	18	7	47	17	4	5	8	13	6	12	7	5	6	8
HOM000480	11	9	6	8	9	11	8	20	7	19	13	12	9	16	14	9	5	6	6
HOM000481	4	10	6	7	10	20	10	25	17	8	8	13	11	7	10	8	12	6	10
HOM000482	8	5	10	8	4	5	46	10	5	7	17	9	13	8	9	6	16	2	0
HOM000483	13	10	11	7	6	20	5	16	13	6	12	13	8	11	8	8	17	8	12
HOM000485	7	5	8	6	12	11	6	23	6	10	11	9	4	12	7	5	12	6	6
HOM000486	14	9	8	7	10	14	8	18	11	8	9	15	11	7	10	11	10	13	10
HOM000487	10	10	11	5	7	22	9	12	10	7	14	11	7	12	5	9	12	12	14
HOM000488	8	9	12	6	7	15	8	8	13	7	9	10	5	10	4	5	17	6	9
HOM000489	4	4	4	8	7	48	19	7	5	37	3	19	4	5	8	9	4	5	4
HOM000490	10	9	9	6	6	14	5	21	12	4	11	10	6	7	6	6	17	12	11
HOM000491	5	6	5	8	6	12	23	5	8	20	12	7	10	6	10	13	10	6	2
HOM000492	9	9	11	9	6	18	7	9	9	11	11	12	6	12	6	9	15	11	10
HOM000493	2	10	21	6	4	19	7	16	6	5	14	13	7	17	5	5	21	7	9
HOM000494	12	10	11	7	11	13	8	8	10	8	19	12	8	13	8	6	14	2	2
HOM000495	8	10	9	12	6	19	11	14	9	14	9	11	9	11	9	9	9	19	17
HOM000496	8	9	7	5	11	19	4	25	7	6	9	11	10	6	10	8	13	11	13
HOM000497	6	7	8	4	8	17	12	14	9	13	6	18	7	7	16	13	10	4	6
HOM000498	10	10	7	6	5	10	10	20	7	27	7	10	6	7	6	6	6	15	16
HOM000499	12	12	7	10	6	18	8	13	9	6	6	11	5	8	7	7	11	13	12
HOM000500	8	8	6	6	10	26	9	5	16	13	7	14	10	10	7	9	6	5	6
HOM000501	5	5	6	8	9	13	12	19	11	9	9	18	9	10	13	11	11	9	9
HOM000502	11	10	8	9	11	13	11	5	7	3	7	16	8	12	7	11	8	11	16
HOM000504	10	9	5	4	7	20	12	18	7	10	17	8	6	10	10	6	8	8	7
HOM000505	6	8	6	8	4	12	3	16	9	4	9	13	7	9	7	7	11	7	5
HOM000506	13	8	6	5	8	10	6	8	6	7	9	8	4	9	6	5	6	10	11
HOM000507	6	6	7	7	7	15	7	34	9	7	7	11	5	8	5	6	11	4	6
HOM000508	7	5	5	7	7	11	14	21	13	10	6	13	6	6	9	9	8	5	5
HOM000509	13	12	6	8	7	8	12	9	5	7	7	7	10	9	3	9	9	10	16
HOM000510	12	11	7	6	6	22	7	27	10	8	7	13	6	6	9	8	11	5	4
HOM000511	6	5	7	9	8	22	4	17	16	6	8	13	9	9	13	10	10	5	5
HOM000512	9	8	5	5	14	8	5	26	10	4	6	16	14	5	9	15	10	11	9
HOM000513	11	9	10	8	6	18	13	10	11	7	10	14	6	9	7	7	14	10	6
HOM000514	9	7	13	7	9	17	12	19	6	7	11	9	6	13	5	10	15	9	10
HOM000515	8	8	12	5	7	15	4	19	8	7	15	9	6	15	6	3	19	5	5
HOM000516	11	11	15	3	15	19	16	11	7	7	10	5	5	17	6	5	7	8	16
HOM000517	7	8	9	8	9	21	9	15	15	10	5	18	9	5	14	9	6	4	5
HOM000518	7	7	4	9	9	24	10	19	13	6	11	18	9	5	9	7	7	9	8
HOM000519	8	9	8	9	4	25	7	13	12	8	10	17	9	7	10	4	12	8	13
HOM000520	5	6	10	3	9	13	6	20	5	4	10	9	3	7	8	7	7	5	5
HOM000521	7	6	9	5	8	20	16	7	13	7	14	20	17	6	9	5	4	2	2
HOM000522	9	6	7	6	4	13	14	22	7	11	10	9	5	11	6	8	9	6	3
HOM000523	9	9	7	6	11	14	9	11	11	13	7	13	8	7	7	13	11	5	4
HOM000524	8	7	4	5	8	16	4	31	10	15	5	9	7	3	7	10	7	8	7
HOM000525	5	5	9	7	13	17	13	17	6	13	11	10	7	9	7	5	12	8	10
HOM000526	10	9	7	7	6	13	14	20	7	10	5	12	5	5	7	11	7	7	10
HOM000527	1	4	34	8	7	0	10	19	9	7	12	11	9	13	2	4	12	5	6
HOM000528	0	2	0	12	70	5	13	0	12	8	0	18	46	0	1	0	0	1	1
HOM000529	11	9	9	8	7	22	7	15	11	9	10	14	6	8	7	16	10	9	5
HOM000530	8	7	8	7	6	16	5	17	8	9	6	11	6	8	9	6	13	10	8
HOM000531	13	11	11	7	5	13	9	32	8	7	8	12	6	9	8	8	12	12	14
HOM000532	8	7	4	4	5	11	7	26	6	6	4	7	5	2	4	9	8	7	4
HOM000533	8	8	8	7	7	21	5	14	11	6	8	15	7	9	7	7	10	9	8
HOM000534	11	8	8	10	9	18	9	9	12	8	8	11	10	8	8	8	15	10	10
HOM000535	11	10	7	8	8	19	3	28	11	5	7	15	7	6	8	9	9	8	7
HOM000536	9	7	9	7	6	17	7	12	10	13	13	11	6	10	7	5	16	6	4
HOM000537	13	9	7	6	5	16	7	11	10	7	10	12	7	9	7	7	16	14	14
HOM000538	13	11	11	5	7	15	13	5	7	14	11	9	6	9	6	7	8	14	22
HOM000539	9	4	7	7	8	20	8	21	14	11	7	15	7	9	10	7	10	3	2
HOM000540	7	8	9	6	6	14	6	10	8	18	9	8	5	8	30	6	10	3	5
HOM000541	11	10	4	9	11	16	9	22	9	6	9	10	9	7	7	9	4	6	9
HOM000542	7	7	5	12	5	16	5	22	10	8	5	11	6	5	7	7	9	9	9
HOM000543	9	10	19	4	4	7	5	7	6	2	15	16	4	15	8	13	14	7	6
HOM000544	8	8	5	7	10	16	5	10	10	1	13	8	9	12	7	5	7	3	2
HOM000545	9	11	7	8	4	18	6	13	19	4	10	14	7	11	7	4	12	10	21
HOM000546	6	5	11	7	6	20	11	16	10	5	9	8	9	11	6	8	14	5	5
HOM000547	6	6	9	4	10	11	7	10	9	1	17	9	7	25	7	5	16	4	4
HOM000548	7	5	7	4	8	9	14	16	8	7	5	9	4	12	9	5	8	10	9
HOM000549	9	6	3	12	11	12	6	29	10	13	3	16	8	3	14	12	7	11	10
HOM000550	2	3	3	5	5	4	37	6	7	38	7	4	4	16	6	6	5	5	9
HOM000551	13	12	6	10	8	11	8	16	13	15	4	14	8	7	10	19	2	9	17
HOM000552	10	11	11	6	6	10	10	9	10	8	15	8	10	11	7	5	11	11	17
HOM000553	12	10	6	7	6	22	6	17	12	4	11	11	6	8	6	7	15	9	9
HOM000554	4	5	4	3	22	5	5	26	4	14	5	23	1	5	4	34	3	2	2
HOM000555	10	7	6	8	6	16	12	22	9	6	7	8	8	7	6	5	7	6	6
HOM000556	7	7	6	7	9	23	6	23	9	9	5	18	7	7	8	8	10	7	4
HOM000557	16	11	4	8	12	21	12	11	12	7	6	11	7	4	7	9	5	4	5
HOM000558	10	11	6	8	12	15	8	13	9	6	10	10	10	7	7	7	8	13	12
HOM000560	10	10	7	7	5	17	7	17	9	8	9	16	7	7	10	7	9	13	13
HOM000562	11	8	6	4	6	17	8	12	9	4	8	14	7	11	6	9	11	10	8
HOM000563	7	7	7	7	7	11	9	35	8	16	8	12	6	4	7	6	8	15	15
HOM000564	10	10	5	8	9	18	14	15	9	9	5	11	7	4	6	7	6	6	8
HOM000565	9	8	8	5	9	20	8	16	10	9	9	11	7	8	8	9	12	8	9
HOM000566	12	13	11	4	3	24	7	8	9	2	11	16	6	11	8	5	11	6	9
HOM000567	8	7	5	13	5	11	16	21	11	7	6	11	9	6	6	3	8	10	10
HOM000568	8	5	6	2	12	3	8	65	4	3	7	5	6	12	5	4	4	6	9
HOM000569	8	8	7	6	6	16	8	17	9	6	9	15	6	6	6	7	9	16	21
HOM000570	10	7	7	8	7	21	7	19	13	4	7	13	7	6	8	7	10	6	8
HOM000571	8	6	5	6	5	14	8	23	8	6	6	9	6	6	6	6	9	6	4
HOM000572	18	14	11	5	5	16	5	8	7	4	11	11	6	11	6	5	14	10	12
HOM000573	7	5	10	10	3	11	22	19	5	8	9	9	3	8	3	5	8	15	20
HOM000574	11	9	12	5	5	11	13	9	6	15	11	6	5	15	5	2	11	2	7
HOM000575	8	3	7	6	11	5	29	9	7	19	14	10	10	5	5	7	0	3	3
HOM000576	7	9	8	5	5	18	6	19	9	4	8	12	4	7	4	5	14	10	12
HOM000577	8	8	7	7	7	16	8	10	13	7	9	14	7	7	17	7	9	11	7
HOM000578	10	9	7	6	5	21	8	16	7	7	7	10	6	8	6	8	9	13	17
HOM000579	4	4	4	5	8	9	8	14	8	8	8	17	8	6	4	8	4	4	4
HOM000580	7	6	7	7	8	10	7	24	8	6	6	7	8	5	6	7	13	10	11
HOM000581	10	9	8	4	3	14	4	9	7	4	8	30	7	6	6	5	11	18	25
HOM000582	7	11	6	6	7	16	7	14	11	5	9	12	6	9	6	5	12	11	11
HOM000583	11	10	4	10	9	9	10	14	8	12	2	14	8	3	6	7	2	15	14
HOM000584	7	8	7	4	7	9	7	20	6	6	7	8	4	12	4	4	18	9	9
HOM000585	5	6	11	3	10	12	4	14	6	9	11	10	5	14	2	3	11	5	4
HOM000586	10	8	6	4	7	11	6	14	8	4	5	9	9	10	9	4	12	8	6
HOM000587	7	7	4	5	6	20	6	23	10	5	6	12	8	5	11	9	7	6	5
HOM000588	4	4	9	3	6	13	10	16	11	6	9	8	8	7	13	8	10	6	6
HOM000589	8	7	6	8	5	15	7	9	10	11	7	13	6	8	6	11	12	15	17
HOM000590	7	7	8	5	12	16	4	22	11	5	5	7	9	7	9	12	6	6	7
HOM000591	11	9	6	5	7	15	8	17	13	6	6	10	6	6	11	7	8	7	12
HOM000592	6	5	9	5	8	10	6	10	10	10	9	15	10	13	9	5	11	4	3
HOM000593	8	6	8	6	7	17	8	12	10	2	9	12	7	9	6	6	10	7	5
HOM000594	8	4	8	4	6	10	4	21	7	8	8	6	3	11	17	15	6	5	2
HOM000595	8	5	7	7	6	8	5	23	6	6	7	10	4	7	5	5	11	6	6
HOM000596	8	8	9	6	5	17	5	15	11	6	10	10	6	5	7	7	13	6	8
HOM000598	9	11	6	6	6	9	5	20	5	7	10	9	6	11	8	9	8	11	8
HOM000599	5	6	10	4	5	14	3	9	9	7	7	11	5	9	4	3	13	4	3
HOM000601	7	5	8	6	10	11	6	21	8	5	10	9	7	11	6	6	8	8	10
HOM000602	11	10	3	5	6	17	5	11	10	14	5	11	7	5	6	7	8	7	5
HOM000603	7	6	6	6	6	9	6	21	9	5	5	9	6	6	5	7	9	5	2
HOM000604	6	7	7	6	13	19	6	24	9	2	8	10	6	7	9	8	6	9	7
HOM000605	5	5	7	5	4	19	10	15	9	8	12	8	5	9	6	7	10	5	6
HOM000606	9	12	0	2	14	5	7	10	6	86	0	7	5	0	2	2	0	2	6
HOM000607	6	7	5	5	3	13	6	19	10	5	6	9	9	2	7	6	6	9	5
HOM000608	9	9	5	5	5	13	12	9	8	7	6	10	6	8	6	4	5	12	14
HOM000609	11	9	6	3	8	14	6	23	14	7	6	12	7	8	7	8	6	4	7
HOM000610	5	5	4	6	9	12	8	14	10	16	8	17	9	10	8	7	6	5	3
HOM000611	7	7	5	7	8	11	5	22	11	6	5	10	8	5	9	10	7	4	4
HOM000612	8	5	6	7	6	19	4	19	10	13	7	11	6	6	5	5	11	6	2
HOM000613	5	4	8	5	2	8	14	10	6	4	10	5	10	9	3	17	15	5	3
HOM000614	11	6	9	8	3	8	7	6	5	12	17	8	6	7	7	7	6	2	2
HOM000615	4	4	5	5	6	15	7	23	8	4	8	10	5	8	7	6	11	5	2
HOM000616	9	9	6	4	4	20	6	12	8	7	6	7	6	7	16	11	6	7	8
HOM000617	9	10	5	6	5	17	11	18	8	12	5	8	6	6	5	7	7	15	18
HOM000618	7	7	8	10	8	10	1	0	9	8	7	7	8	7	7	7	7	12	23
HOM000619	10	3	6	6	6	7	15	4	6	17	13	16	7	12	6	8	5	1	0
HOM000620	5	4	13	5	8	4	2	19	6	12	15	10	3	16	5	7	15	1	2
HOM000621	6	5	5	6	8	12	5	11	5	24	8	8	7	7	20	5	5	6	4
HOM000622	8	7	7	6	5	20	6	16	11	7	7	11	5	6	6	7	13	5	5
HOM000624	10	11	4	6	7	10	4	20	11	6	4	13	7	5	7	16	7	5	3
HOM000625	7	5	6	5	8	9	6	16	6	6	6	6	7	6	6	7	7	6	7
HOM000626	8	6	7	5	7	13	7	19	11	7	6	10	8	7	7	4	15	8	8
HOM000627	4	3	5	7	8	14	7	24	9	14	5	8	5	5	5	6	5	4	2
HOM000628	6	5	6	6	4	9	3	12	7	2	6	9	10	5	6	6	7	5	3
HOM000629	5	3	6	5	6	11	11	24	7	3	5	10	7	4	6	6	6	3	5
HOM000630	7	4	6	5	5	15	11	20	7	8	10	8	7	6	7	7	5	7	10
HOM000631	10	9	7	6	12	14	6	12	10	5	6	8	7	3	7	7	11	9	9
HOM000632	14	10	10	5	6	15	5	12	9	7	8	10	8	7	6	5	13	7	7
HOM000633	5	5	6	6	5	11	7	16	7	7	6	10	10	5	5	7	7	6	6
HOM000634	10	9	4	5	9	13	2	41	8	4	5	12	7	3	7	6	4	8	7
HOM000635	11	9	6	5	5	13	6	10	10	7	5	7	6	9	6	6	14	7	5
HOM000636	16	8	6	5	5	8	5	14	8	8	6	14	8	4	5	6	9	13	8
HOM000637	7	7	7	5	5	16	8	13	8	5	8	10	5	8	6	6	9	7	6
HOM000638	7	7	7	4	14	17	10	19	7	9	8	7	7	6	11	6	6	4	5
HOM000639	8	4	3	5	5	11	10	15	7	4	5	7	4	3	4	6	7	6	6
HOM000640	4	4	7	9	4	15	4	13	9	4	7	13	8	8	7	9	12	3	3
HOM000641	5	5	4	6	7	23	10	16	10	9	5	6	10	7	6	12	6	5	5
HOM000642	39	26	4	9	11	4	2	24	5	6	0	14	1	3	7	4	2	10	10
HOM000643	7	12	5	4	9	15	5	9	12	5	7	11	10	7	14	3	4	1	1
HOM000644	3	3	5	5	5	7	8	11	9	9	10	5	5	10	6	8	7	3	2
HOM000645	6	6	8	4	10	10	10	13	8	5	5	10	5	7	4	8	9	5	5
HOM000646	10	10	7	8	8	18	9	14	10	2	6	12	7	7	6	5	12	8	7
HOM000647	6	6	7	7	8	15	6	21	6	7	7	7	6	7	5	8	13	6	6
HOM000648	10	8	4	4	5	15	6	10	11	6	8	9	6	6	5	5	8	11	5
HOM000649	8	7	8	5	4	16	9	11	10	6	9	9	6	11	6	7	11	10	9
HOM000650	6	6	8	6	7	19	4	16	9	5	9	10	6	10	5	5	18	5	7
HOM000651	7	7	6	6	5	15	13	8	8	4	6	11	4	6	7	5	7	13	16
HOM000653	12	16	9	3	7	8	7	9	6	3	10	6	5	13	4	12	8	14	10
HOM000654	6	5	8	5	3	13	9	13	6	5	8	7	5	7	5	5	12	6	3
HOM000655	7	6	7	7	12	11	5	16	8	4	6	5	5	8	5	8	11	12	10
HOM000656	9	8	6	4	3	12	7	14	4	4	9	5	4	3	4	4	7	7	6
HOM000657	8	8	4	7	11	13	10	23	10	10	4	10	11	7	5	6	1	4	8
HOM000658	5	5	7	4	7	15	7	21	7	4	8	9	12	6	4	5	8	10	9
HOM000659	8	7	7	5	4	20	6	12	10	8	8	9	5	12	5	5	17	6	6
HOM000660	4	4	8	6	5	8	6	17	8	5	10	7	5	8	7	3	10	5	5
HOM000661	7	7	1	2	15	11	13	36	8	2	2	17	7	1	11	5	2	8	6
HOM000662	8	8	7	6	6	13	4	19	9	9	7	8	7	7	6	6	10	7	8
HOM000663	8	5	5	10	4	9	11	17	6	7	6	7	5	6	6	5	8	18	29
HOM000664	6	6	10	7	5	16	8	12	7	5	10	6	5	7	5	9	9	6	7
HOM000665	12	11	5	5	4	19	12	7	9	6	8	8	5	7	6	6	10	16	18
HOM000666	8	2	0	7	6	4	49	13	1	23	0	9	21	1	6	5	2	1	7
HOM000667	6	7	8	2	3	5	2	12	7	7	9	6	5	11	10	10	12	6	9
HOM000668	7	7	4	9	5	12	3	17	7	7	4	10	5	4	6	10	7	10	14
HOM000670	6	7	5	6	4	10	4	21	3	10	10	5	3	6	4	5	6	7	7
HOM000671	5	5	5	5	5	15	4	18	8	5	6	7	7	4	6	8	13	6	5
HOM000672	47	22	4	3	2	9	5	7	4	16	4	6	3	4	2	3	5	11	14
HOM000673	0	6	8	6	8	16	5	14	10	4	7	14	8	11	8	8	13	5	3
HOM000674	5	6	7	5	9	16	8	14	8	5	6	15	5	6	9	7	13	5	4
HOM000675	7	8	7	8	6	16	5	12	10	5	6	13	6	7	7	6	8	11	13
HOM000676	6	6	8	8	5	17	4	12	13	6	8	12	6	8	9	7	13	5	3
HOM000677	7	7	4	5	7	16	6	17	8	6	5	7	6	4	7	11	8	8	10
HOM000678	6	5	6	10	6	11	4	16	8	8	5	9	7	8	7	8	10	6	6
HOM000679	7	7	3	9	12	17	7	15	9	6	3	8	7	2	6	6	4	9	7
HOM000680	1	11	2	11	11	14	7	20	8	8	3	17	5	3	9	10	4	15	20
HOM000681	0	1	18	0	2	2	2	1	4	0	33	3	1	28	2	1	9	1	1
HOM000682	6	5	5	4	5	11	5	38	7	4	5	10	6	5	4	5	6	6	6
HOM000683	7	7	9	6	5	15	9	5	7	9	8	10	5	8	5	5	12	8	9
HOM000684	0	3	16	0	0	4	1	0	0	3	4	0	0	46	0	0	40	2	2
HOM000685	4	4	4	3	12	14	6	7	6	14	3	14	7	4	12	4	6	3	3
HOM000687	5	2	5	6	5	33	5	15	7	0	5	25	8	6	11	4	5	2	3
HOM000688	6	6	6	4	6	11	7	19	7	4	7	11	5	4	5	6	7	5	4
HOM000690	8	8	7	6	5	15	2	13	9	6	7	12	8	5	8	10	11	9	7
HOM000691	5	6	7	5	12	10	5	10	9	2	16	14	11	8	4	8	6	7	6
HOM000692	4	4	5	4	5	12	8	16	6	5	5	7	15	8	9	7	8	4	4
HOM000693	6	6	5	12	6	14	10	22	10	3	4	10	7	5	8	10	7	9	11
HOM000694	5	4	4	6	10	7	4	22	5	3	3	7	2	10	43	4	7	7	7
HOM000695	7	7	7	4	7	18	3	14	9	5	7	8	7	7	6	5	9	7	5
HOM000696	7	4	3	6	7	9	9	14	20	3	3	17	9	6	6	10	6	3	3
HOM000697	6	5	6	5	4	14	9	12	9	5	5	14	7	3	6	5	10	4	3
HOM000698	7	7	6	5	3	9	9	21	7	9	6	10	6	4	6	5	7	6	4
HOM000699	6	6	6	7	6	16	7	12	7	8	7	9	7	6	5	4	11	10	8
HOM000700	6	6	7	7	4	25	8	12	2	13	7	19	4	5	5	10	6	5	4
HOM000701	8	12	6	7	7	9	7	11	10	3	7	9	5	11	5	4	11	20	27
HOM000702	10	9	7	3	4	13	5	15	6	3	7	8	4	7	7	5	11	12	14
HOM000703	5	4	6	5	6	27	10	8	7	5	4	9	5	3	5	11	10	4	3
HOM000704	9	8	7	6	9	12	4	13	9	5	8	11	6	7	7	7	7	3	5
HOM000705	8	9	11	6	5	11	6	11	9	5	10	4	4	10	6	3	11	2	6
HOM000706	9	7	5	5	3	14	9	17	10	2	5	8	6	4	7	8	7	5	5
HOM000707	8	6	5	9	14	11	9	5	9	11	5	11	6	5	11	7	10	9	9
HOM000708	7	8	4	5	7	9	7	22	9	5	3	12	8	3	9	7	7	6	8
HOM000709	3	3	6	6	9	7	7	17	3	12	2	6	3	7	5	4	5	11	13
HOM000710	11	5	4	5	8	11	7	12	6	7	4	10	5	5	4	8	4	9	13
HOM000711	6	6	4	6	6	16	5	21	9	5	6	11	6	8	6	7	8	4	5
HOM000712	7	7	6	4	4	13	10	14	9	5	7	12	5	11	5	7	13	9	11
HOM000713	7	5	5	4	3	8	7	7	3	12	4	5	4	10	2	14	7	9	14
HOM000715	7	7	4	6	9	13	6	4	7	5	5	6	5	4	7	7	6	7	8
HOM000716	5	5	6	4	5	13	7	23	6	6	7	5	7	6	3	4	6	3	4
HOM000717	6	10	7	4	2	4	8	8	6	3	12	4	11	11	6	6	11	16	20
HOM000719	7	6	6	6	5	14	11	10	8	7	8	8	5	7	7	5	9	10	18
HOM000721	11	10	6	4	3	15	7	18	7	11	7	8	4	9	4	4	6	6	5
HOM000722	11	9	5	3	8	13	15	19	7	5	5	9	3	6	7	4	7	5	8
HOM000723	7	7	3	6	7	12	6	21	8	9	3	10	7	2	6	6	7	7	9
HOM000724	8	6	5	5	5	15	7	15	11	4	5	10	7	5	6	9	10	7	9
HOM000725	8	8	8	4	5	20	7	13	8	5	11	6	5	8	5	4	12	4	6
HOM000726	9	8	7	5	6	16	6	12	10	4	5	7	4	5	5	6	11	9	10
HOM000727	7	8	5	5	4	15	6	10	10	3	6	10	5	9	5	5	12	7	8
HOM000730	8	8	8	6	6	10	6	17	9	4	7	11	4	7	5	5	10	14	14
HOM000731	7	8	7	3	6	16	5	12	9	5	9	10	4	6	6	5	8	5	5
HOM000732	7	7	7	6	5	14	7	9	8	4	7	8	8	13	7	5	10	9	14
HOM000733	8	9	4	10	3	15	10	7	7	11	5	8	6	5	6	7	6	13	11
HOM000734	5	5	7	3	9	9	4	15	4	6	8	7	4	7	3	4	9	7	7
HOM000735	2	1	2	4	1	1	7	3	1	1	81	4	1	1	3	1	9	2	1
HOM000736	3	3	6	5	9	19	9	13	6	5	11	7	4	6	6	5	8	4	3
HOM000737	10	6	7	3	6	9	8	9	6	6	5	8	10	9	3	3	5	4	2
HOM000738	5	5	6	5	4	17	16	6	4	2	6	10	3	5	4	6	9	4	5
HOM000740	3	3	5	6	8	12	4	11	10	3	6	14	6	7	8	9	7	4	6
HOM000741	6	6	6	6	7	13	6	10	6	5	8	7	8	8	6	6	5	6	6
HOM000743	5	3	11	3	3	10	8	7	5	8	14	5	2	14	4	6	11	5	13
HOM000744	12	9	6	7	3	14	4	10	11	6	7	8	7	6	6	9	9	8	9
HOM000745	15	11	5	5	6	6	5	17	4	1	4	6	6	4	8	6	11	4	3
HOM000747	5	5	6	7	5	13	5	17	9	6	6	11	6	6	6	4	7	5	4
HOM000748	5	5	5	6	5	14	4	7	8	7	7	8	5	6	5	6	7	5	5
HOM000749	7	7	7	3	5	12	8	12	7	5	6	8	5	6	6	6	11	6	7
HOM000750	4	4	3	3	3	7	2	36	5	10	11	7	4	4	5	6	11	2	6
HOM000751	6	8	9	5	3	9	3	10	9	6	9	9	6	8	7	5	11	11	11
HOM000752	4	4	2	4	4	8	5	26	6	14	4	18	10	7	6	5	4	6	6
HOM000753	4	2	3	6	10	7	4	27	7	10	3	14	4	4	3	6	7	3	2
HOM000754	7	7	6	5	7	14	9	17	7	4	7	8	6	6	6	7	7	14	15
HOM000755	2	3	17	4	3	16	3	19	5	37	3	3	5	2	2	4	4	1	2
HOM000756	5	5	6	4	3	12	6	18	7	8	7	11	4	8	3	5	10	5	5
HOM000757	12	13	1	16	12	4	9	17	6	11	1	8	18	1	9	2	1	16	27
HOM000758	10	10	6	3	5	13	6	14	8	5	5	11	5	8	5	7	7	4	3
HOM000759	1	1	0	1	1	3	4	1	1	126	0	1	1	0	2	0	0	1	2
HOM000760	3	3	5	5	7	12	4	11	9	2	6	9	6	8	6	5	9	3	1
HOM000762	7	7	4	4	4	18	3	13	9	15	6	5	5	4	4	4	17	7	8
HOM000763	2	2	5	6	5	12	15	11	11	9	6	9	7	5	7	10	5	2	2
HOM000764	1	1	6	3	5	10	7	11	9	4	10	17	6	8	6	7	7	1	1
HOM000765	0	1	0	19	5	2	1	3	15	50	0	2	13	0	31	0	0	3	3
HOM000766	5	6	4	5	4	14	3	13	9	8	6	11	7	5	5	5	10	8	7
HOM000767	7	5	6	4	6	16	10	10	10	4	6	8	7	6	9	7	5	5	7
HOM000768	6	6	5	5	3	13	6	16	6	4	7	5	4	5	5	5	6	4	3
HOM000769	10	7	5	5	4	8	4	22	7	5	3	9	8	2	6	5	5	4	4
HOM000770	4	3	5	3	4	9	21	9	4	13	15	4	2	6	5	3	14	2	1
HOM000771	8	7	5	5	6	12	6	17	11	5	6	11	5	5	6	6	10	7	6
HOM000772	10	8	7	4	4	17	7	7	7	9	8	8	3	7	4	6	8	12	13
HOM000773	7	7	4	13	4	7	9	6	4	2	5	6	4	3	5	6	5	6	5
HOM000774	9	6	4	4	4	11	3	21	10	2	4	11	6	5	6	6	9	4	4
HOM000775	4	4	8	6	5	2	16	6	5	12	10	4	6	9	4	6	20	2	1
HOM000776	7	7	6	6	6	7	7	12	7	1	6	5	5	10	7	5	7	14	18
HOM000778	5	5	5	6	6	15	7	12	9	6	6	11	6	4	6	7	11	5	4
HOM000779	12	16	10	6	1	9	3	9	11	3	13	4	4	13	3	2	9	3	3
HOM000780	6	6	6	4	6	12	4	17	2	16	9	8	4	6	3	3	9	4	2
HOM000781	2	2	5	17	3	1	12	25	11	4	4	7	2	6	6	3	5	13	14
HOM000784	6	7	4	5	3	11	7	14	6	5	5	6	5	3	4	6	14	7	9
HOM000785	11	8	5	3	4	9	3	11	6	6	4	8	6	4	7	6	11	6	6
HOM000786	5	6	1	5	11	12	2	17	12	3	3	21	9	4	11	0	2	1	1
HOM000787	10	9	6	4	5	9	4	13	9	4	6	8	5	6	7	8	9	10	10
HOM000789	9	4	7	4	8	13	7	16	6	4	5	13	6	3	6	5	4	4	4
HOM000790	3	3	0	7	15	25	9	17	8	8	0	18	9	0	6	10	0	4	4
HOM000791	5	5	4	4	5	8	6	16	5	4	4	7	9	1	5	10	14	6	3
HOM000792	5	4	4	6	4	8	16	16	5	5	4	9	5	8	4	11	8	8	5
HOM000793	12	10	4	4	7	13	5	14	9	5	5	9	5	6	5	1	7	4	5
HOM000794	4	4	6	7	5	9	8	18	7	5	7	10	5	8	11	5	7	10	23
HOM000795	5	5	7	7	6	11	4	17	8	4	6	8	5	8	6	8	11	5	5
HOM000796	5	5	7	5	4	12	5	14	7	5	7	9	5	6	6	7	10	6	6
HOM000797	5	5	3	7	5	13	6	10	9	5	3	13	7	3	14	7	6	5	4
HOM000798	7	7	5	6	5	10	4	14	6	3	5	11	4	8	5	4	10	8	4
HOM000799	6	8	6	3	5	5	8	10	5	1	8	8	10	8	6	8	8	4	2
HOM000800	6	5	4	6	8	10	6	13	7	5	4	6	6	8	5	9	8	6	4
HOM000802	6	6	5	6	4	10	2	18	10	4	5	13	5	7	5	6	8	7	4
HOM000803	6	6	6	7	9	10	4	6	9	2	6	7	7	9	6	6	6	7	11
HOM000804	5	5	4	7	8	11	9	14	5	3	4	7	4	4	4	5	7	7	3
HOM000805	5	5	4	2	4	12	15	16	8	5	10	8	4	5	4	5	10	7	6
HOM000806	11	5	6	5	4	8	2	14	7	4	5	10	4	5	4	5	6	5	5
HOM000807	8	8	5	6	8	18	3	14	10	7	4	11	6	4	6	5	5	7	9
HOM000808	8	6	5	6	5	15	5	15	6	4	5	10	5	3	6	8	7	5	4
HOM000809	8	8	3	5	6	14	6	15	10	6	3	8	5	3	5	4	5	9	9
HOM000811	4	5	7	5	8	8	9	15	5	5	9	5	4	7	6	5	9	6	4
HOM000812	7	8	7	5	7	6	5	8	6	3	4	9	6	5	7	6	5	1	1
HOM000813	4	4	7	4	4	11	6	11	6	4	7	10	5	11	4	4	11	3	2
HOM000814	4	4	5	5	5	10	6	14	7	3	5	13	6	5	5	5	7	7	6
HOM000815	14	6	7	6	3	10	3	8	9	4	11	5	4	6	5	4	7	7	7
HOM000816	5	5	4	5	3	12	3	17	6	2	5	8	3	6	4	7	9	6	4
HOM000817	12	6	4	4	4	10	6	8	7	2	5	8	6	4	4	6	7	7	5
HOM000818	7	8	3	6	4	10	1	19	11	2	4	8	5	4	6	7	7	6	5
HOM000819	1	1	1	5	31	7	3	18	9	30	0	6	7	1	6	6	1	2	2
HOM000821	6	5	8	3	7	13	3	8	10	3	8	10	5	12	7	3	7	2	2
HOM000822	4	5	6	5	6	11	6	14	10	3	5	8	5	5	11	4	10	6	4
HOM000823	6	4	3	4	4	16	5	16	7	3	5	8	4	5	4	4	5	4	4
HOM000824	5	6	5	6	5	9	5	10	5	6	5	7	6	4	5	7	7	5	6
HOM000825	11	6	6	4	5	7	9	11	6	5	5	7	3	3	3	4	5	5	2
HOM000826	5	5	7	4	3	10	1	12	6	10	7	7	4	6	5	4	7	5	4
HOM000827	3	3	5	4	3	14	3	19	12	5	5	6	12	6	4	5	6	3	3
HOM000828	5	5	10	3	5	10	8	6	4	7	10	5	4	8	5	8	7	5	7
HOM000829	1	1	1	1	79	1	1	24	1	0	1	7	2	1	2	1	1	1	1
HOM000830	9	8	6	4	6	11	2	15	9	5	6	8	5	7	5	6	8	8	5
HOM000831	7	8	5	5	5	10	6	9	8	5	6	9	5	6	5	10	7	5	6
HOM000832	2	2	4	2	7	7	3	26	8	4	5	11	8	5	6	5	5	3	3
HOM000833	8	8	5	3	12	11	7	11	5	4	4	8	3	4	7	6	7	9	11
HOM000835	7	5	6	4	6	10	6	11	7	4	11	8	10	5	4	4	11	9	10
HOM000836	7	6	5	4	10	10	10	5	6	5	5	8	5	2	4	5	5	7	6
HOM000837	6	6	7	4	8	7	20	9	7	8	5	10	5	5	6	5	6	4	3
HOM000838	5	5	4	5	5	10	5	21	6	3	6	8	5	5	5	6	5	6	4
HOM000839	7	5	7	3	2	10	5	8	9	6	8	8	4	7	5	4	11	6	3
HOM000840	3	3	5	11	9	16	2	12	7	5	4	5	5	6	5	3	6	3	3
HOM000841	7	8	7	4	4	16	7	12	8	5	6	8	5	5	5	5	8	12	9
HOM000842	7	5	6	4	3	12	4	15	8	5	5	9	4	4	5	5	8	4	4
HOM000844	4	6	5	4	6	8	5	9	6	2	7	9	5	5	4	12	9	5	6
HOM000845	4	4	6	7	6	16	8	12	8	8	6	12	5	5	5	5	4	6	6
HOM000846	5	5	6	3	4	13	7	16	5	6	5	10	7	7	3	5	9	7	5
HOM000847	4	2	9	4	7	9	5	18	4	4	6	4	4	7	2	7	5	2	2
HOM000848	6	6	7	5	4	14	6	5	5	3	7	7	5	6	4	4	9	5	6
HOM000849	4	5	6	3	3	11	9	5	7	6	10	6	4	12	5	4	10	5	7
HOM000850	2	3	5	4	5	9	6	10	9	5	5	6	5	5	10	4	8	3	2
HOM000851	6	6	5	4	5	15	8	9	7	6	6	8	4	6	4	4	9	3	4
HOM000852	4	3	4	5	3	7	9	21	6	4	5	5	8	3	6	3	6	3	3
HOM000853	4	5	7	5	5	8	3	15	8	4	7	7	4	6	7	4	15	5	4
HOM000854	6	6	6	3	4	12	3	16	8	6	5	10	4	5	4	4	8	9	7
HOM000855	5	5	5	5	6	9	1	10	9	3	4	10	9	4	8	5	1	3	6
HOM000856	4	4	4	5	3	10	5	8	5	3	5	7	4	6	4	5	4	5	6
HOM000858	3	4	5	4	3	10	8	8	3	10	4	4	5	2	5	2	2	3	2
HOM000859	6	5	5	3	3	9	4	8	5	4	5	5	4	5	4	4	14	3	3
HOM000860	10	9	8	2	4	11	5	4	5	6	10	4	2	9	6	5	8	6	6
HOM000861	5	5	6	5	5	14	6	11	9	5	5	10	7	5	6	6	6	5	5
HOM000862	7	5	6	5	5	15	7	1	9	3	7	7	5	1	7	7	16	4	4
HOM000863	6	5	5	3	5	4	8	26	6	11	6	6	3	4	6	3	6	9	13
HOM000864	7	5	4	6	4	11	5	12	8	2	8	9	5	11	4	6	4	4	4
HOM000865	4	4	3	2	6	6	11	7	13	8	4	15	12	4	8	5	3	2	2
HOM000866	6	5	5	6	4	15	7	12	10	4	5	7	4	5	5	4	8	3	3
HOM000867	5	6	3	4	6	15	5	11	11	9	3	8	8	5	4	3	4	5	5
HOM000868	6	7	5	6	6	13	6	12	7	2	9	7	4	6	6	3	5	7	6
HOM000869	2	2	14	4	7	4	3	13	2	3	7	5	6	9	6	8	8	3	3
HOM000870	6	7	6	3	4	12	5	13	5	4	7	6	3	6	5	5	11	7	7
HOM000871	1	4	4	2	4	8	3	11	17	0	2	45	3	5	2	5	2	13	16
HOM000872	6	6	4	3	7	16	8	13	7	3	4	10	3	7	5	4	9	5	7
HOM000873	5	7	4	4	4	12	8	18	7	8	4	7	4	4	5	4	7	9	10
HOM000874	12	5	6	3	3	10	15	8	6	3	6	5	3	6	5	4	12	8	8
HOM000875	5	5	6	5	4	14	4	13	10	4	6	10	8	10	5	1	9	4	4
HOM000878	6	4	5	5	6	5	4	0	7	14	5	8	3	7	7	8	4	8	7
HOM000879	6	7	2	5	7	14	5	17	11	4	3	10	5	2	6	7	3	8	8
HOM000880	7	5	4	4	3	6	13	18	6	5	4	6	4	7	3	3	4	8	7
HOM000882	5	5	8	4	4	11	3	9	7	4	7	10	4	9	8	4	13	7	8
HOM000883	8	6	4	11	7	8	5	15	4	9	4	9	5	5	5	4	3	2	2
HOM000884	4	4	5	7	5	18	5	10	6	5	5	12	5	4	5	4	5	3	4
HOM000885	7	6	7	3	7	9	3	15	6	4	5	6	4	5	4	6	7	9	8
HOM000886	7	5	4	5	4	21	7	10	7	4	6	7	4	3	6	7	8	7	5
HOM000887	8	5	4	5	4	20	7	11	5	4	5	5	5	6	7	3	5	3	2
HOM000889	6	6	4	4	4	27	1	8	6	4	4	8	4	4	6	5	5	6	4
HOM000890	5	6	4	5	4	10	6	16	5	2	4	6	3	3	3	3	8	5	7
HOM000891	5	5	5	8	7	10	4	8	8	4	6	6	6	4	9	5	5	4	5
HOM000892	4	4	5	4	5	11	6	15	7	5	5	6	5	6	3	3	8	4	2
HOM000893	6	3	5	5	5	10	14	16	5	2	5	6	4	2	4	5	8	5	2
HOM000895	7	6	5	4	4	13	3	4	8	5	5	7	4	4	19	4	6	7	7
HOM000896	5	5	4	5	6	8	5	15	6	3	6	8	5	8	5	4	5	7	10
HOM000897	4	4	5	9	4	11	4	11	6	5	6	11	4	5	5	8	8	9	11
HOM000898	6	5	6	3	5	8	4	2	8	4	6	7	7	7	5	5	10	7	7
HOM000899	4	4	4	6	4	11	7	23	5	1	3	6	3	4	6	3	5	4	4
HOM000900	6	7	5	9	4	7	13	11	6	3	8	5	4	4	4	2	7	5	5
HOM000901	8	5	5	4	4	10	9	13	4	5	5	7	3	5	4	4	6	7	7
HOM000902	5	5	5	4	5	10	6	10	7	7	7	8	4	6	4	5	7	4	4
HOM000903	4	7	6	4	5	10	3	16	7	2	8	5	4	6	3	4	8	4	2
HOM000904	6	4	5	3	5	11	6	14	7	3	5	9	4	7	7	4	10	4	4
HOM000906	5	4	7	3	4	10	3	6	7	4	9	7	4	5	5	6	10	5	2
HOM000907	6	3	3	5	3	5	2	9	4	2	4	6	5	1	3	5	2	4	3
HOM000908	9	5	7	8	5	9	1	6	7	2	6	8	5	5	5	6	8	4	5
HOM000909	10	12	3	4	6	8	11	10	6	4	4	8	4	2	6	3	5	6	7
HOM000910	4	4	7	5	8	7	3	19	5	3	5	7	4	5	4	7	7	4	6
HOM000911	3	3	7	3	3	11	5	10	7	5	7	6	3	9	3	3	12	4	5
HOM000912	5	3	6	5	4	10	4	12	11	5	4	8	7	5	8	4	9	4	4
HOM000913	5	5	6	5	4	10	6	7	5	6	7	8	5	7	4	4	7	5	9
HOM000914	5	5	4	3	3	10	7	8	3	20	4	5	3	4	8	7	6	5	6
HOM000916	5	5	4	5	4	7	2	17	6	6	5	9	6	3	5	5	4	7	6
HOM000917	11	8	4	5	4	10	5	23	7	5	6	8	3	4	4	2	5	7	6
HOM000918	5	5	4	3	7	10	6	10	4	12	6	4	9	5	3	3	3	5	5
HOM000919	8	5	2	3	5	7	5	9	6	4	3	10	5	3	7	2	3	2	1
HOM000920	1	5	12	7	3	14	4	9	7	4	4	8	4	7	4	5	12	12	17
HOM000921	7	8	2	4	5	11	7	17	6	6	4	10	5	2	4	6	5	5	6
HOM000922	9	9	6	4	4	15	8	10	7	7	5	7	5	5	4	3	7	12	10
HOM000924	3	3	6	6	5	11	8	15	8	3	6	9	3	6	4	3	10	5	4
HOM000925	6	5	6	9	2	11	4	12	5	5	7	8	5	6	4	3	8	5	4
HOM000926	4	4	2	5	10	9	7	14	6	6	4	8	5	9	6	6	5	1	2
HOM000927	5	4	7	6	4	8	5	10	7	2	9	6	4	8	4	4	9	8	8
HOM000928	2	2	3	8	7	7	9	12	7	5	2	4	3	2	8	10	2	3	5
HOM000929	7	4	4	4	9	7	4	24	4	7	5	7	2	5	3	4	5	3	3
HOM000930	6	7	7	2	3	7	4	6	6	4	9	10	8	8	6	5	11	3	2
HOM000932	4	4	3	4	6	12	5	19	6	4	5	8	5	2	4	5	5	5	1
HOM000934	3	3	1	2	3	7	2	13	5	4	3	6	2	5	2	3	42	2	0
HOM000935	9	6	3	7	6	8	3	15	4	4	5	7	5	4	3	5	6	5	5
HOM000936	7	9	4	5	3	6	2	5	8	8	3	6	6	4	8	3	5	2	2
HOM000938	5	5	5	4	3	9	6	8	5	7	6	5	4	3	4	6	6	5	4
HOM000940	6	6	2	3	3	13	7	5	7	11	7	9	4	4	8	3	4	5	8
HOM000941	7	6	4	4	5	10	7	2	4	6	4	17	3	2	4	6	6	5	3
HOM000942	3	3	3	2	2	7	7	35	4	0	3	18	2	5	2	4	7	5	4
HOM000943	4	4	7	4	2	11	6	5	5	4	6	7	9	15	4	4	8	3	4
HOM000944	3	3	2	6	3	7	8	18	10	10	2	19	4	4	3	5	2	8	10
HOM000945	6	5	5	5	4	11	5	13	8	7	5	8	5	3	6	4	7	4	5
HOM000946	3	4	4	4	5	12	7	14	8	4	6	8	5	3	5	7	10	4	3
HOM000948	4	4	4	9	4	7	6	1	5	4	4	6	4	4	4	6	5	9	9
HOM000949	8	6	4	4	6	8	5	7	8	3	5	6	8	1	6	3	5	5	4
HOM000950	2	1	4	2	9	4	4	23	8	5	7	5	11	4	2	1	4	1	1
HOM000951	6	5	7	3	6	9	3	10	6	3	7	7	4	5	7	3	8	2	2
HOM000952	6	6	5	3	3	7	6	8	6	2	5	10	3	4	3	3	20	6	7
HOM000953	7	6	5	5	5	10	3	13	10	2	5	9	5	5	5	4	9	8	8
HOM000954	5	5	6	5	3	7	3	5	7	6	5	8	5	6	4	7	7	6	8
HOM000955	10	7	9	2	3	8	4	6	2	2	8	4	3	4	5	2	9	5	6
HOM000956	4	4	6	4	3	9	5	11	3	9	3	11	3	3	4	5	5	5	2
HOM000957	8	5	6	3	5	9	5	17	6	2	2	6	3	6	5	3	5	3	2
HOM000958	3	5	5	6	7	10	7	8	8	7	4	8	8	4	5	5	7	4	5
HOM000959	5	4	5	3	4	12	7	9	5	7	8	6	3	5	6	4	8	4	4
HOM000960	5	4	4	5	4	6	7	7	5	2	7	10	3	4	3	3	7	5	5
HOM000961	3	2	6	5	2	4	11	2	6	23	9	6	7	4	3	7	3	3	3
HOM000962	6	6	7	3	4	12	2	9	7	4	7	7	4	5	4	8	8	6	6
HOM000965	5	5	4	5	2	10	3	12	6	6	4	6	4	4	4	5	11	5	4
HOM000966	6	5	4	1	17	20	10	17	3	9	5	3	2	3	1	0	5	4	4
HOM000967	5	3	4	6	3	5	5	14	5	2	13	5	3	4	7	3	9	3	1
HOM000968	4	4	6	4	3	9	3	8	5	5	7	6	4	6	4	5	7	3	5
HOM000969	11	8	6	4	4	8	6	7	7	3	7	6	5	6	3	3	4	6	9
HOM000971	9	6	5	4	4	10	6	10	7	3	4	10	4	5	4	5	12	7	11
HOM000972	5	5	3	4	4	7	3	13	4	4	4	6	2	4	4	4	3	6	5
HOM000973	5	5	4	6	5	12	10	7	7	1	4	5	3	6	3	16	6	4	4
HOM000974	11	5	4	2	4	8	1	15	4	2	4	5	6	6	4	4	11	4	4
HOM000975	3	3	2	2	4	6	6	6	3	37	2	3	4	2	2	3	3	3	1
HOM000976	4	3	4	2	4	6	2	33	4	0	5	5	3	3	3	3	4	8	10
HOM000977	4	4	5	6	7	11	9	12	5	4	6	5	4	7	5	4	7	7	8
HOM000979	5	6	4	4	3	9	6	7	4	2	4	5	4	4	5	4	4	5	7
HOM000980	7	6	4	5	9	5	5	8	5	6	4	14	2	3	4	5	3	6	7
HOM000981	5	4	3	4	2	6	4	13	5	4	3	6	3	5	3	4	4	4	8
HOM000982	5	3	4	4	16	4	4	14	3	6	5	3	4	3	3	3	3	2	2
HOM000983	6	5	6	4	4	14	7	11	4	4	6	4	3	6	4	4	10	6	7
HOM000984	12	5	3	3	7	2	5	17	6	1	6	2	2	4	10	3	6	5	3
HOM000985	5	5	4	4	5	9	6	13	7	8	4	7	6	5	4	4	7	6	10
HOM000987	5	5	3	4	4	10	3	13	6	7	3	7	4	3	4	6	5	6	4
HOM000988	5	3	5	3	5	11	11	13	5	6	5	6	3	4	4	4	5	3	2
HOM000989	8	6	4	5	2	11	3	4	4	9	7	6	7	4	2	10	4	5	6
HOM000990	6	5	4	5	3	7	7	13	6	4	4	10	6	0	6	6	3	6	6
HOM000991	6	5	3	3	3	7	6	21	4	2	5	6	2	3	3	4	5	4	4
HOM000992	2	2	5	4	4	11	6	13	7	5	6	9	4	7	4	3	8	4	4
HOM000993	6	6	3	4	4	10	9	8	4	3	5	7	3	5	5	4	5	7	9
HOM000994	7	6	5	3	6	8	3	13	4	8	4	5	3	5	4	4	5	5	3
HOM000995	11	10	4	4	3	7	3	15	7	3	6	7	4	6	4	2	8	7	7
HOM000996	3	3	6	4	7	7	8	10	5	3	4	5	7	4	5	5	8	3	2
HOM000997	9	5	5	3	6	9	7	11	3	5	5	8	2	3	4	4	4	3	4
HOM000998	2	2	1	2	42	1	1	45	1	1	1	3	1	1	1	1	1	1	1
HOM000999	5	6	3	5	9	8	1	15	4	0	3	6	6	2	7	8	5	4	2
HOM001000	15	18	3	3	4	9	3	11	6	6	4	7	3	6	5	1	5	7	5
HOM001001	6	5	4	6	5	5	2	18	6	3	4	5	4	3	4	4	6	5	3
HOM001002	3	3	6	3	3	16	6	9	3	1	8	4	3	5	3	4	9	5	4
HOM001003	6	4	3	3	4	8	10	16	4	6	3	5	3	3	3	3	3	3	3
HOM001004	4	5	6	3	3	7	7	12	4	4	4	3	4	4	5	4	4	3	4
HOM001005	5	5	4	4	3	15	7	6	6	12	3	11	6	2	5	5	5	4	3
HOM001006	6	4	7	3	3	7	5	5	6	1	7	7	4	9	3	3	12	5	4
HOM001007	5	4	6	4	8	11	6	3	7	4	4	10	5	5	6	5	6	9	10
HOM001008	6	6	3	4	5	10	3	19	8	4	4	8	3	3	4	5	7	6	6
HOM001009	14	5	4	5	2	4	6	4	5	7	5	6	2	4	3	2	9	5	6
HOM001010	6	4	4	2	4	7	7	11	8	3	3	6	4	3	4	4	5	6	5
HOM001011	4	3	4	5	5	12	5	10	5	3	5	6	5	6	4	3	7	3	2
HOM001012	5	5	5	4	4	14	6	11	6	5	4	6	4	7	5	4	7	4	4
HOM001013	6	5	4	6	3	9	9	9	7	2	7	7	3	4	5	3	6	6	6
HOM001014	5	5	5	10	3	8	5	14	5	4	7	6	4	6	4	4	5	6	6
HOM001016	4	3	1	2	3	2	22	2	3	17	5	3	6	3	6	6	6	3	2
HOM001017	3	3	3	4	6	8	11	10	6	9	4	5	6	4	8	5	6	8	7
HOM001018	5	3	6	8	3	9	6	7	8	7	4	10	4	4	6	6	3	3	3
HOM001019	9	8	3	3	4	10	4	22	5	1	6	6	4	2	3	2	5	14	19
HOM001020	3	4	4	4	4	8	4	10	6	3	4	11	4	4	8	3	4	2	4
HOM001021	4	4	3	4	3	5	3	19	7	4	3	11	4	3	3	5	5	4	3
HOM001022	5	5	5	4	5	9	10	14	7	5	5	5	4	5	4	4	6	8	8
HOM001023	5	5	5	3	5	8	3	11	7	4	5	7	4	4	4	4	5	6	5
HOM001024	7	6	4	5	5	8	7	9	6	7	3	6	4	4	4	4	6	6	6
HOM001025	9	5	5	4	4	8	5	9	5	3	6	5	3	5	3	4	6	4	4
HOM001027	2	6	5	1	4	7	4	7	7	5	10	10	4	5	11	3	5	2	3
HOM001028	2	2	3	5	4	5	4	20	5	2	5	14	3	4	3	6	6	2	2
HOM001029	2	4	1	2	1	4	30	1	4	4	17	3	0	6	4	4	4	1	1
HOM001030	4	4	4	3	4	8	3	11	6	4	6	10	4	4	4	4	4	5	6
HOM001031	4	4	4	5	3	10	5	4	7	5	4	7	4	10	3	4	9	9	9
HOM001032	1	3	2	12	5	8	4	10	4	10	3	7	4	6	2	5	5	4	3
HOM001033	6	6	5	4	2	8	7	12	6	4	4	5	4	3	4	4	6	6	6
HOM001034	7	7	4	2	3	10	5	13	3	5	6	4	2	4	2	3	4	5	3
HOM001035	3	4	4	5	3	8	3	7	5	4	4	5	4	4	6	4	7	6	4
HOM001036	4	4	7	4	4	9	3	10	8	1	6	8	5	6	3	4	9	4	4
HOM001037	8	6	4	3	7	9	4	9	8	4	5	9	3	3	10	4	6	5	8
HOM001038	8	6	7	4	3	10	2	8	6	2	7	10	4	7	5	2	9	6	7
HOM001039	5	5	6	3	3	13	4	10	5	4	8	4	3	4	3	4	7	4	5
HOM001040	7	5	6	5	8	7	3	18	2	0	6	3	3	5	4	4	6	3	2
HOM001041	5	5	4	2	4	9	3	16	5	1	5	5	3	4	4	5	4	3	3
HOM001042	7	4	4	4	4	12	3	4	7	3	5	8	4	11	2	3	7	2	2
HOM001043	5	4	4	4	5	6	6	7	5	3	3	6	5	6	3	12	9	3	3
HOM001044	4	3	5	2	3	9	3	11	6	3	6	7	4	5	4	4	6	4	5
HOM001045	9	6	4	3	3	6	1	8	5	3	5	5	3	4	5	4	8	4	4
HOM001046	3	2	4	1	5	6	7	24	5	3	5	6	2	5	3	5	6	2	2
HOM001047	5	4	3	4	4	6	8	6	7	6	3	9	3	6	4	6	8	10	12
HOM001048	5	5	5	4	6	6	5	5	5	3	6	7	4	4	3	4	8	4	3
HOM001049	3	3	2	3	3	13	8	8	8	6	3	6	4	4	5	9	3	4	4
HOM001050	7	5	5	2	3	6	5	12	4	3	5	7	2	6	4	4	14	4	3
HOM001051	3	3	6	6	2	9	5	18	6	5	7	6	3	4	2	3	5	2	1
HOM001052	5	4	4	4	3	5	3	7	4	2	4	5	3	4	3	4	7	4	4
HOM001053	4	3	3	2	6	3	6	23	3	1	5	5	3	2	4	5	4	5	4
HOM001054	4	3	4	3	4	8	8	20	4	2	5	5	3	5	4	3	6	3	3
HOM001055	4	4	4	4	3	7	5	11	5	7	3	8	4	5	6	3	6	5	4
HOM001056	6	4	5	4	6	13	5	4	6	4	6	7	3	6	4	4	9	2	5
HOM001057	3	3	4	2	3	12	6	16	4	5	5	6	3	4	3	1	5	3	2
HOM001058	3	4	5	3	5	5	3	16	4	8	5	5	3	6	6	4	8	3	3
HOM001059	6	5	3	4	5	8	4	16	4	5	3	7	4	2	5	2	2	5	3
HOM001060	5	5	6	4	5	8	5	7	5	3	6	7	5	6	4	3	8	16	21
HOM001061	5	4	8	3	4	5	3	5	4	2	9	5	3	10	4	3	9	4	4
HOM001062	4	4	5	5	4	6	3	12	3	2	6	4	4	4	3	3	6	4	2
HOM001063	4	3	4	5	5	10	3	8	5	8	5	8	3	4	4	4	7	3	4
HOM001064	4	2	18	1	8	8	3	15	3	18	3	3	0	8	2	1	6	2	1
HOM001065	7	8	7	0	1	5	3	13	2	5	10	3	3	8	4	2	10	5	5
HOM001066	5	5	3	4	5	14	7	9	6	2	3	5	4	3	4	5	4	5	7
HOM001067	7	6	5	5	5	8	4	13	5	4	5	5	2	5	5	3	9	5	4
HOM001068	6	6	5	4	6	8	3	11	7	4	5	7	4	5	5	4	7	2	2
HOM001069	8	13	2	5	11	9	1	6	4	4	5	12	2	7	6	2	3	5	12
HOM001070	2	2	3	3	8	7	1	27	5	11	3	6	3	4	4	3	8	3	5
HOM001071	6	5	3	4	5	10	8	10	5	6	5	7	3	3	4	4	6	4	3
HOM001072	6	5	5	3	5	11	5	4	7	2	6	7	3	5	4	4	11	6	8
HOM001073	1	1	6	2	6	7	4	4	5	3	7	7	4	8	4	4	7	2	2
HOM001074	4	4	4	3	3	7	2	14	5	7	4	11	3	5	3	4	6	3	2
HOM001075	6	6	4	4	4	8	4	10	6	2	5	7	5	5	5	7	5	6	6
HOM001076	4	3	6	3	3	13	7	9	8	12	5	6	4	5	4	2	5	3	4
HOM001077	5	6	6	4	3	11	6	5	7	1	8	9	3	7	3	4	8	5	10
HOM001078	5	4	4	5	4	6	3	9	6	5	5	10	5	5	5	3	10	4	14
HOM001079	3	3	5	5	4	13	10	11	5	4	5	6	4	4	6	5	4	7	12
HOM001080	6	5	5	2	3	5	1	11	4	2	7	9	3	5	3	3	10	6	5
HOM001082	3	3	4	3	5	9	6	11	4	2	4	5	4	2	3	3	7	3	5
HOM001083	3	3	4	5	6	7	2	14	10	5	2	7	5	3	6	5	6	4	3
HOM001084	5	4	3	3	5	8	3	14	4	5	3	5	3	3	3	4	5	4	3
HOM001085	6	7	4	2	5	9	4	7	5	5	7	7	4	7	4	3	6	4	2
HOM001086	43	43	1	1	1	1	1	1	1	1	1	1	1	1	1	1	1	14	11
HOM001087	11	8	3	3	8	8	4	12	4	0	3	6	3	3	3	9	6	3	3
HOM001088	4	3	4	3	5	10	4	11	5	4	4	5	4	4	3	3	14	3	3
HOM001089	4	4	4	4	4	9	4	9	4	7	4	6	4	6	3	4	6	3	4
HOM001090	4	4	4	4	4	11	4	8	5	7	5	10	6	7	5	1	6	3	3
HOM001091	4	4	5	2	2	9	2	7	5	6	8	5	3	5	3	3	11	4	4
HOM001092	5	5	3	6	3	9	4	13	7	3	4	8	3	2	3	4	3	4	5
HOM001093	1	1	0	2	46	0	2	10	3	0	2	10	7	0	16	2	0	1	4
HOM001094	4	3	10	2	8	13	6	3	4	3	5	10	5	5	3	4	3	2	2
HOM001095	4	4	2	2	4	8	4	11	5	3	2	7	3	3	7	3	16	2	2
HOM001096	7	6	4	3	7	7	5	16	7	2	6	6	4	5	3	3	6	5	6
HOM001097	7	6	6	5	3	11	4	7	6	3	6	6	3	4	3	3	6	4	5
HOM001099	5	5	4	2	3	10	5	11	6	5	5	7	3	3	4	3	5	4	3
HOM001100	6	6	6	2	5	8	3	6	10	2	7	7	6	6	5	4	6	6	7
HOM001101	7	5	3	3	4	11	5	11	7	4	3	5	4	5	4	4	8	3	5
HOM001102	3	3	3	4	4	11	3	13	8	6	4	8	5	4	5	5	5	3	4
HOM001104	2	3	3	2	2	4	4	12	4	3	8	3	4	3	3	2	5	2	2
HOM001105	4	5	3	4	3	12	4	14	7	2	4	4	4	3	4	4	9	5	4
HOM001106	4	4	4	5	3	11	4	18	5	4	4	5	5	4	5	5	4	4	6
HOM001107	4	4	4	5	4	8	1	10	8	4	4	9	5	3	5	5	7	3	2
HOM001108	4	4	3	3	4	10	2	11	8	7	5	6	4	6	3	4	7	8	3
HOM001109	5	3	4	1	5	8	4	8	5	5	4	7	3	5	4	6	4	2	4
HOM001110	4	3	4	3	3	5	5	11	6	2	4	6	3	6	3	3	5	5	7
HOM001111	5	4	5	4	5	9	3	8	6	5	5	7	4	7	5	4	7	3	4
HOM001112	8	6	2	3	3	6	3	14	4	5	3	5	4	3	4	8	4	5	4
HOM001113	5	5	4	3	3	6	3	7	6	2	6	5	4	5	3	4	11	6	4
HOM001114	4	3	5	5	5	6	5	9	6	6	5	6	5	4	4	4	7	5	4
HOM001115	4	4	4	4	2	10	8	9	5	3	4	7	3	4	3	5	4	3	6
HOM001116	4	4	4	5	5	7	3	13	5	3	4	6	4	5	2	3	6	5	2
HOM001117	4	4	3	3	3	6	1	28	3	5	3	5	4	3	3	3	5	4	4
HOM001118	8	8	2	2	6	4	3	10	8	7	2	4	3	2	11	5	2	3	2
HOM001119	3	3	4	2	2	6	2	12	5	3	4	6	4	8	4	5	10	3	3
HOM001120	4	4	5	3	3	8	5	6	6	4	6	7	3	8	3	3	9	4	2
HOM001121	2	2	3	4	5	7	3	12	5	7	6	8	4	2	5	4	8	3	1
HOM001122	8	7	3	3	2	10	4	7	6	4	4	14	5	5	5	5	4	6	8
HOM001123	4	4	3	4	4	6	4	10	7	4	3	8	3	3	5	3	6	5	5
HOM001124	4	5	5	3	3	8	3	11	4	5	5	4	2	5	2	2	19	7	6
HOM001126	6	5	8	5	4	6	3	7	5	1	5	6	3	4	3	3	8	4	7
HOM001127	4	3	5	3	5	10	3	10	5	2	5	5	3	4	4	3	6	3	1
HOM001128	6	3	3	2	2	7	4	11	3	1	3	4	3	8	4	5	4	5	3
HOM001130	7	4	5	3	4	8	5	4	7	4	4	5	5	4	5	3	4	5	6
HOM001131	4	4	3	4	4	9	5	5	4	7	11	5	4	7	3	3	3	5	6
HOM001132	7	6	5	2	2	12	1	20	5	0	4	8	4	5	3	3	3	5	4
HOM001133	4	3	5	5	4	8	3	16	5	4	4	10	5	4	4	4	6	3	3
HOM001134	6	5	4	3	6	9	4	8	9	3	5	10	4	3	4	5	6	6	5
HOM001135	4	3	4	4	6	8	1	8	4	7	6	4	6	6	5	4	8	1	2
HOM001136	4	4	5	7	3	7	3	9	6	2	5	8	4	4	4	4	8	3	3
HOM001137	4	4	4	5	4	7	3	6	6	2	6	6	5	5	4	4	5	3	4
HOM001138	6	7	7	3	2	6	3	11	5	6	5	7	3	7	2	2	6	5	4
HOM001139	5	5	4	4	7	11	5	7	7	3	4	7	3	5	5	5	4	4	7
HOM001140	3	3	3	3	4	5	5	10	5	3	5	5	4	4	3	3	6	4	1
HOM001142	4	6	5	4	4	10	0	10	5	5	6	7	5	4	3	4	5	4	3
HOM001143	5	5	4	2	7	8	4	14	7	3	3	4	4	3	4	4	7	4	4
HOM001144	4	4	4	4	6	6	2	14	7	4	4	7	3	5	4	6	5	3	4
HOM001145	4	3	6	6	3	7	7	4	6	1	6	6	6	3	3	5	5	4	5
HOM001146	11	6	3	4	5	14	5	5	5	5	3	8	3	5	5	1	3	2	4
HOM001147	5	4	3	3	5	7	6	7	3	3	5	4	3	4	3	3	3	3	2
HOM001148	7	4	5	5	4	8	1	10	4	3	5	5	3	6	4	4	8	4	3
HOM001149	3	2	8	3	3	8	3	7	5	3	8	5	3	9	3	3	12	2	2
HOM001150	4	2	7	3	3	6	14	2	6	7	8	6	0	2	3	9	5	2	2
HOM001151	3	3	3	3	4	13	7	11	7	5	3	6	4	5	4	4	5	1	0
HOM001153	3	3	4	3	4	9	2	11	8	6	4	8	4	4	5	4	7	3	3
HOM001154	6	4	2	3	2	6	10	10	4	6	3	6	5	4	5	3	9	4	2
HOM001155	5	6	3	3	3	8	5	13	5	3	3	7	4	6	4	5	2	6	12
HOM001156	6	3	2	2	10	4	4	9	4	1	4	3	5	2	3	5	2	7	10
HOM001157	6	6	3	4	3	9	2	13	6	5	3	6	3	4	3	3	5	7	6
HOM001158	5	5	3	4	4	10	7	10	7	8	3	10	5	3	5	2	3	4	5
HOM001159	7	8	3	2	2	26	0	5	4	7	4	9	3	1	5	1	8	3	5
HOM001160	2	2	3	3	5	7	2	7	5	1	4	7	4	5	5	4	5	2	2
HOM001161	16	2	3	1	2	2	5	25	1	6	2	2	2	14	1	1	2	3	2
HOM001162	6	5	4	2	2	10	5	10	5	8	4	6	3	3	3	3	5	8	7
HOM001163	5	3	5	3	3	8	2	6	4	5	6	6	5	4	6	3	4	2	2
HOM001164	7	5	3	3	4	6	5	10	6	2	4	4	3	3	5	4	6	5	5
HOM001166	6	4	3	3	7	10	5	13	4	2	4	5	3	3	4	4	4	3	4
HOM001167	3	3	4	3	2	7	2	14	6	3	4	10	4	5	4	3	10	3	2
HOM001169	6	6	3	4	3	9	7	9	4	4	3	5	3	2	3	3	5	8	8
HOM001170	4	4	2	4	5	3	4	12	4	1	4	8	3	7	2	2	5	4	4
HOM001171	2	3	3	4	2	7	6	13	4	3	4	7	3	3	4	3	3	3	5
HOM001172	5	5	5	3	4	7	4	11	4	3	5	5	3	5	3	3	5	6	6
HOM001173	4	4	5	5	4	5	4	6	6	5	5	6	4	5	5	3	10	2	2
HOM001174	4	3	3	5	5	6	3	22	4	3	4	5	3	1	3	3	6	3	3
HOM001176	2	2	6	4	4	9	2	2	7	3	3	6	3	5	4	4	4	2	1
HOM001177	3	3	3	2	4	10	2	6	5	17	3	7	3	3	2	2	5	2	2
HOM001178	3	3	3	4	3	5	2	20	5	3	2	5	3	2	5	2	4	3	2
HOM001179	3	3	2	3	3	9	2	19	4	2	3	6	3	1	3	8	3	3	3
HOM001180	2	2	3	3	4	7	7	14	7	4	2	6	4	1	4	5	2	2	1
HOM001181	5	3	4	5	6	7	5	10	5	10	4	7	3	4	4	5	2	8	10
HOM001182	5	5	0	3	14	14	5	21	6	11	0	4	5	0	4	0	0	2	2
HOM001183	5	5	4	4	3	6	2	15	4	0	4	6	3	5	3	3	6	3	2
HOM001184	5	4	4	4	3	7	4	11	3	7	4	5	3	4	3	4	8	4	5
HOM001185	7	5	4	6	5	9	4	12	6	1	4	4	3	3	4	3	5	5	5
HOM001186	4	4	3	6	3	7	5	7	4	4	4	3	3	4	5	3	6	7	8
HOM001187	3	3	3	3	5	11	6	4	4	17	3	3	5	3	7	5	5	5	3
HOM001188	2	3	4	2	2	3	2	4	5	5	4	4	2	4	2	2	3	4	4
HOM001189	5	6	6	2	4	7	2	16	4	2	5	4	4	3	4	3	6	2	2
HOM001190	3	3	5	2	3	5	2	6	7	2	4	3	5	4	2	5	4	3	3
HOM001191	8	7	5	5	3	8	3	9	4	3	6	5	2	6	2	2	9	11	12
HOM001192	3	3	4	4	4	10	4	8	5	4	4	5	3	6	3	4	10	3	4
HOM001193	2	1	5	1	2	3	17	4	4	14	2	5	7	5	2	8	4	5	6
HOM001194	4	4	4	4	5	10	6	9	6	3	4	8	3	3	3	5	6	5	3
HOM001195	5	5	4	5	4	12	6	3	4	6	4	8	5	4	5	2	8	1	1
HOM001196	3	4	5	4	2	6	4	6	4	5	7	5	2	3	4	3	4	7	8
HOM001197	3	3	5	4	2	5	10	0	5	7	11	4	0	6	4	6	9	3	3
HOM001199	2	2	1	3	2	9	4	8	5	4	9	10	4	6	4	1	12	1	0
HOM001200	4	3	5	3	8	12	4	8	5	8	5	5	3	5	3	4	5	1	1
HOM001201	3	3	3	3	3	6	2	7	4	4	4	5	9	4	3	3	4	3	3
HOM001202	4	3	3	3	3	10	5	3	5	1	6	5	3	6	3	8	10	4	4
HOM001203	6	3	4	4	2	6	7	5	6	1	4	7	3	4	5	4	5	4	4
HOM001204	2	5	3	5	5	11	5	10	6	1	5	10	5	4	4	4	7	4	6
HOM001205	5	5	4	3	4	8	3	6	8	2	5	7	4	5	4	4	9	6	9
HOM001206	6	5	7	4	6	10	3	8	5	8	4	5	3	2	5	4	6	4	5
HOM001207	4	2	2	7	2	4	6	11	4	10	2	5	2	4	2	2	7	14	19
HOM001208	7	5	2	3	5	7	4	7	6	5	2	4	3	2	3	3	3	3	5
HOM001209	5	4	6	3	3	9	6	8	4	2	4	7	3	5	3	4	4	8	8
HOM001210	6	5	4	4	4	9	4	10	6	7	2	8	4	3	4	4	5	5	7
HOM001211	4	4	4	5	4	13	8	6	5	8	3	5	4	6	3	3	3	7	6
HOM001212	6	5	5	3	3	10	3	6	6	4	6	5	3	5	3	3	8	4	2
HOM001213	4	4	4	4	2	8	4	14	6	4	5	6	4	6	3	3	5	3	3
HOM001214	4	3	2	6	3	4	4	13	3	4	3	4	2	7	2	7	2	2	2
HOM001215	7	7	5	5	5	7	10	4	4	3	2	5	3	1	4	3	2	4	2
HOM001216	6	6	5	4	2	8	4	5	7	5	4	8	3	4	3	5	5	12	13
HOM001217	5	9	1	1	10	6	4	11	4	0	2	5	4	2	6	8	3	2	3
HOM001218	3	3	3	5	4	8	8	10	4	3	3	4	3	2	4	5	5	4	2
HOM001220	4	4	4	5	5	8	3	5	6	4	4	6	3	4	2	5	8	3	3
HOM001221	2	2	2	5	4	5	12	11	2	16	2	9	2	2	2	5	3	4	5
HOM001222	4	4	3	4	3	8	3	7	4	3	3	6	3	4	4	3	5	4	5
HOM001223	9	9	3	2	2	5	3	7	3	4	3	5	3	3	3	3	3	7	8
HOM001224	5	6	4	2	4	10	6	3	6	6	3	7	5	3	5	5	5	4	4
HOM001225	5	6	4	5	4	5	2	7	6	5	6	7	3	3	3	4	9	6	5
HOM001226	5	5	5	3	3	5	2	7	4	7	4	5	4	4	3	4	4	5	4
HOM001227	4	4	4	2	2	6	4	8	3	2	4	4	5	3	2	5	6	4	4
HOM001228	4	4	3	4	3	13	4	7	5	12	3	6	5	3	4	2	4	4	4
HOM001229	2	3	3	6	3	7	10	6	6	4	3	6	4	3	6	4	4	10	11
HOM001230	5	5	3	4	4	10	4	6	5	5	4	5	3	5	5	1	7	3	5
HOM001231	2	2	3	3	4	6	2	16	5	0	3	6	4	2	3	3	8	1	1
HOM001232	6	4	3	5	4	21	2	4	3	1	4	4	3	2	2	14	3	3	5
HOM001233	6	6	4	3	4	6	6	9	5	9	4	3	3	2	4	3	5	4	2
HOM001234	3	3	3	3	3	6	3	9	4	2	3	4	3	4	3	12	8	7	9
HOM001235	3	3	4	4	7	8	2	9	5	2	4	6	3	2	6	4	7	3	1
HOM001239	3	3	9	3	3	10	3	10	6	1	5	5	3	4	3	2	6	2	3
HOM001240	3	3	3	7	5	8	8	8	5	1	1	8	4	4	4	4	5	3	3
HOM001241	3	3	3	2	3	12	9	11	6	3	3	4	3	3	6	3	5	4	3
HOM001242	7	4	6	1	2	7	2	8	3	2	6	5	3	5	3	4	9	4	3
HOM001243	6	4	1	3	2	11	7	15	4	4	2	5	2	1	3	5	1	5	4
HOM001244	6	4	3	2	2	6	4	11	5	1	4	5	4	4	3	2	7	4	7
HOM001245	2	5	5	3	5	5	2	7	3	4	7	4	3	4	4	6	7	3	2
HOM001247	9	9	5	3	3	6	4	1	6	2	5	6	3	5	2	2	15	3	4
HOM001248	3	3	4	2	3	5	4	11	4	1	3	5	2	5	2	2	5	4	3
HOM001249	11	10	3	4	3	9	4	6	5	2	4	5	3	2	3	3	4	4	4
HOM001251	4	5	6	3	3	8	4	5	4	5	4	5	2	7	6	3	5	6	5
HOM001252	8	2	1	0	6	5	4	23	4	3	3	9	4	2	6	0	2	7	9
HOM001253	2	2	1	20	1	32	6	8	3	2	2	3	2	1	2	1	2	1	1
HOM001254	3	3	3	4	4	6	3	10	3	3	3	6	3	4	3	3	3	3	2
HOM001255	6	4	2	3	5	4	2	26	2	3	2	3	2	2	2	5	1	2	0
HOM001257	6	5	4	4	2	5	2	7	5	5	4	4	3	3	2	3	7	6	6
HOM001258	4	4	4	4	3	7	3	8	5	3	4	7	5	4	3	5	6	3	4
HOM001259	2	2	2	4	3	16	4	6	9	5	4	8	5	1	4	9	4	2	2
HOM001260	3	2	5	3	3	4	3	13	3	5	5	3	2	5	2	4	8	3	3
HOM001261	1	1	2	1	2	33	12	7	1	11	1	6	2	1	1	1	1	1	1
HOM001263	3	3	2	3	2	9	4	15	5	3	4	4	4	3	4	4	5	2	2
HOM001264	3	3	3	7	3	8	4	11	5	5	4	4	3	3	3	3	5	4	4
HOM001266	2	2	16	2	1	5	1	4	2	3	9	3	2	14	3	2	7	1	4
HOM001267	4	4	5	3	3	6	6	7	6	4	5	4	3	4	3	4	6	5	5
HOM001268	5	5	4	3	3	8	4	8	6	4	3	4	3	3	5	4	4	6	9
HOM001269	5	4	3	4	5	13	3	9	5	2	4	5	4	5	4	3	4	3	3
HOM001270	3	3	4	3	2	7	3	10	5	4	6	4	3	8	4	4	6	3	3
HOM001271	5	2	3	3	2	3	1	15	4	2	3	4	11	4	3	3	2	2	2
HOM001272	3	4	10	2	2	5	2	7	2	0	11	4	2	9	2	4	11	3	2
HOM001273	1	2	1	1	2	7	8	28	2	7	1	7	2	1	2	12	1	4	5
HOM001274	2	2	3	5	4	6	5	9	3	3	3	4	3	3	6	4	3	3	1
HOM001275	5	5	5	3	3	7	3	11	4	6	5	4	2	4	4	5	3	1	2
HOM001276	11	5	2	3	3	7	4	8	2	4	3	4	3	4	2	2	5	3	2
HOM001278	3	3	3	4	5	7	4	6	5	3	4	8	5	3	3	4	3	2	1
HOM001279	5	5	4	4	4	10	4	10	4	1	4	8	5	5	5	4	5	3	5
HOM001280	7	9	0	1	14	2	1	32	1	1	0	3	1	0	3	1	0	5	8
HOM001281	4	3	4	1	2	4	1	7	4	0	4	7	3	3	4	3	8	2	2
HOM001282	5	5	5	3	4	6	4	9	4	0	5	3	4	5	4	3	4	5	4
HOM001284	3	3	3	3	8	4	4	10	3	3	3	5	3	3	2	3	4	3	3
HOM001285	3	2	5	3	3	4	2	8	4	3	4	4	2	3	2	5	4	2	2
HOM001287	2	2	4	2	2	4	1	9	5	7	4	7	3	4	4	3	6	2	2
HOM001289	2	2	4	2	5	7	3	7	5	7	5	3	6	3	1	11	4	1	1
HOM001292	3	3	3	4	3	9	5	8	5	6	3	5	4	3	3	3	5	4	4
HOM001293	5	6	4	4	8	9	5	3	4	4	3	6	5	3	8	3	3	2	2
HOM001294	1	3	3	2	2	8	7	5	3	9	6	4	2	1	4	11	3	3	3
HOM001295	5	3	4	2	2	9	4	11	3	3	3	4	3	3	6	2	4	3	2
HOM001296	2	3	2	3	3	5	1	12	3	3	10	5	1	6	3	5	3	2	0
HOM001297	3	3	3	3	3	5	4	9	3	3	4	5	4	2	4	3	5	4	3
HOM001298	5	5	3	3	2	7	3	6	5	2	4	7	4	4	3	2	4	4	4
HOM001299	5	4	6	2	2	4	6	5	4	2	6	4	2	2	2	2	9	7	2
HOM001300	3	2	2	2	3	6	4	11	4	4	4	4	5	2	7	3	5	2	2
HOM001301	3	3	5	4	3	2	3	7	3	7	1	4	2	3	2	4	4	3	1
HOM001302	4	3	5	2	4	10	5	6	4	9	4	4	3	3	3	3	6	3	2
HOM001303	5	5	2	3	4	8	2	16	8	4	2	4	4	2	5	1	3	5	7
HOM001304	3	3	3	2	3	5	3	8	6	3	5	4	2	2	2	2	6	3	3
HOM001305	2	2	4	2	5	9	6	9	4	7	4	6	3	1	4	5	4	3	2
HOM001307	5	5	3	3	3	6	3	13	5	3	4	7	2	2	4	3	5	5	7
HOM001308	4	5	3	2	3	12	4	8	3	8	4	2	4	3	3	3	8	3	3
HOM001310	3	2	3	2	4	6	6	9	3	3	5	4	2	2	4	2	5	3	3
HOM001311	4	3	3	3	3	7	3	14	5	1	3	5	5	2	5	3	8	2	2
HOM001312	4	5	3	3	5	2	2	1	11	2	4	6	10	6	8	2	3	2	1
HOM001313	4	4	1	2	3	9	4	8	6	2	9	6	3	6	3	3	3	6	13
HOM001314	5	3	6	3	4	6	3	10	2	5	4	5	2	3	3	3	6	4	2
HOM001315	3	3	3	3	3	6	5	5	5	3	3	4	3	3	3	3	6	7	7
HOM001316	5	5	3	3	4	8	4	6	5	3	2	6	4	4	4	3	5	5	5
HOM001317	2	2	6	2	2	6	4	6	2	18	3	4	2	4	2	3	6	6	4
HOM001318	4	3	3	2	4	4	3	6	4	7	2	4	3	2	4	6	5	2	1
HOM001319	7	4	9	2	4	4	1	6	4	3	4	4	5	8	5	3	5	3	2
HOM001320	4	5	3	3	5	6	5	5	5	4	3	4	3	3	3	3	4	4	4
HOM001321	5	4	8	3	6	5	2	6	3	5	6	5	3	6	4	2	7	5	5
HOM001322	4	4	4	3	4	6	8	10	5	1	4	6	4	4	4	5	4	5	5
HOM001324	2	2	2	2	29	3	2	3	3	1	4	3	3	2	3	12	4	2	1
HOM001325	3	3	5	5	2	15	3	2	6	7	3	4	4	3	5	4	6	2	2
HOM001326	3	3	3	2	2	4	5	8	6	2	3	4	4	4	9	3	3	3	3
HOM001327	3	2	6	1	3	4	5	6	2	3	9	5	2	10	2	4	8	4	4
HOM001328	4	4	3	3	5	8	2	12	7	3	3	4	4	3	5	3	5	3	3
HOM001329	5	3	3	3	4	5	3	8	2	3	3	4	4	3	2	6	7	3	4
HOM001330	5	4	3	3	4	8	4	9	8	2	3	7	4	2	4	4	4	4	4
HOM001331	26	48	0	0	2	0	0	4	0	0	0	0	3	0	5	0	0	2	2
HOM001332	3	2	7	3	3	4	2	11	5	1	5	4	2	11	4	2	10	2	2
HOM001334	2	2	3	4	7	6	1	6	4	4	4	5	3	3	3	3	5	3	3
HOM001335	4	4	4	3	4	5	1	6	5	2	4	7	3	5	4	4	4	3	2
HOM001336	7	7	4	5	7	5	3	6	4	3	3	4	5	5	5	2	5	1	1
HOM001337	2	2	4	2	2	6	1	6	6	5	4	4	2	3	2	2	8	2	2
HOM001338	2	2	4	3	3	5	4	6	4	5	3	3	3	7	2	3	12	5	8
HOM001340	3	3	3	5	2	10	4	5	5	2	4	5	4	2	4	8	3	3	3
HOM001341	5	5	2	3	1	8	4	3	4	4	3	6	3	2	2	5	6	5	5
HOM001342	7	7	3	3	5	8	4	6	6	2	4	5	3	3	3	3	4	7	10
HOM001343	4	4	3	3	3	9	2	8	6	0	3	9	6	3	4	4	7	6	5
HOM001344	4	5	0	0	5	7	3	9	12	5	0	20	4	1	7	5	0	1	2
HOM001345	5	5	7	3	3	9	2	7	4	7	4	3	3	4	2	3	11	4	3
HOM001346	7	6	5	2	3	5	3	7	3	4	4	4	3	4	4	2	6	6	6
HOM001348	1	1	3	3	3	8	3	12	3	9	3	8	3	2	3	3	3	1	1
HOM001350	2	3	3	5	2	8	8	8	6	4	3	7	3	2	7	3	4	7	6
HOM001351	3	3	3	3	2	6	3	5	3	3	4	3	3	3	3	3	4	4	4
HOM001352	6	5	5	4	2	7	2	2	5	1	6	6	4	4	5	5	7	4	4
HOM001354	5	4	4	4	4	6	4	7	5	6	4	4	3	4	3	4	6	3	4
HOM001355	3	2	3	2	4	5	1	14	2	6	4	5	4	3	3	4	5	1	1
HOM001356	2	2	2	5	2	4	5	3	3	7	2	3	2	2	2	2	2	2	5
HOM001357	2	4	2	2	4	6	2	6	2	2	5	4	2	5	3	2	4	4	5
HOM001358	5	4	1	3	5	11	5	12	7	1	1	11	4	1	5	3	2	3	3
HOM001359	4	3	4	3	1	3	3	9	4	3	4	2	2	5	7	2	5	3	2
HOM001360	9	5	4	4	3	7	1	14	6	2	3	5	3	2	3	3	4	6	6
HOM001361	4	3	4	3	2	7	3	9	4	3	3	7	3	4	2	3	7	5	6
HOM001362	2	3	3	3	4	5	7	5	3	1	4	4	5	3	4	3	5	7	7
HOM001363	4	4	3	1	3	6	3	10	2	2	4	5	2	6	3	5	6	7	5
HOM001364	5	4	3	3	3	6	5	8	6	3	3	6	3	3	3	3	5	4	4
HOM001365	5	3	3	2	2	8	3	9	4	3	3	3	3	3	2	4	5	3	1
HOM001366	5	3	3	3	5	6	0	10	6	2	2	8	4	2	4	4	7	5	2
HOM001367	3	3	3	3	3	5	3	6	3	3	3	4	4	3	3	3	3	4	5
HOM001370	6	4	0	2	1	6	13	4	7	20	0	11	1	0	3	7	0	4	3
HOM001371	5	5	5	2	2	2	1	10	3	2	5	5	3	8	3	4	11	7	5
HOM001373	7	6	4	2	2	6	8	8	2	3	4	4	2	8	3	2	4	2	3
HOM001375	7	6	2	4	5	8	3	9	5	4	2	5	4	2	5	3	2	4	7
HOM001376	3	4	4	4	4	11	6	7	6	11	2	4	4	2	3	3	5	5	6
HOM001377	2	2	1	1	4	8	7	16	2	5	3	3	1	1	3	3	8	2	2
HOM001378	1	1	4	2	5	7	4	11	4	3	5	4	3	2	3	2	10	1	1
HOM001380	3	4	2	2	3	9	4	11	5	2	2	6	3	3	3	3	4	3	3
HOM001381	2	3	6	2	3	5	7	13	2	0	4	4	3	3	3	7	4	3	3
HOM001382	3	3	2	5	3	8	5	11	4	4	2	5	4	2	5	4	4	4	6
HOM001383	3	3	4	3	3	7	5	5	3	7	3	6	4	3	2	3	3	1	2
HOM001384	3	4	4	4	1	5	4	7	5	1	4	4	3	2	3	3	8	4	3
HOM001386	2	2	2	3	8	9	2	9	3	4	5	4	2	3	2	3	8	1	1
HOM001387	6	6	2	5	4	6	7	7	6	6	2	10	3	1	5	2	2	5	6
HOM001388	3	5	2	6	6	6	4	9	7	8	4	7	4	2	2	5	3	4	4
HOM001389	4	4	5	4	3	10	3	1	5	4	6	7	2	4	4	5	5	4	2
HOM001390	4	4	4	4	3	10	3	7	3	2	5	4	4	7	4	4	5	7	4
HOM001391	3	3	3	1	5	7	2	21	3	2	3	4	2	3	4	2	4	3	2
HOM001392	7	5	1	4	1	6	5	5	4	3	1	4	3	1	6	2	3	3	4
HOM001393	0	1	0	0	1	2	1	3	2	0	0	4	1	0	1	1	0	2	3
HOM001394	4	3	4	3	2	4	3	7	2	0	4	7	3	4	4	5	5	3	3
HOM001395	4	3	4	2	1	4	1	1	1	1	11	2	1	7	1	1	7	6	5
HOM001396	2	2	6	3	3	5	3	5	5	2	5	4	3	4	3	3	6	2	2
HOM001397	4	3	3	1	3	9	4	8	5	5	3	12	3	3	3	3	2	5	3
HOM001398	3	3	5	4	5	6	2	13	4	2	5	4	2	4	2	4	6	2	2
HOM001399	4	3	4	2	3	5	1	11	9	2	4	5	3	3	3	3	6	2	2
HOM001400	4	4	4	4	2	5	5	8	5	2	4	3	3	4	4	4	4	3	3
HOM001401	4	3	4	4	2	6	0	7	4	4	3	3	3	2	5	3	8	3	2
HOM001402	3	3	6	3	4	6	3	5	3	0	5	6	3	6	3	3	6	4	4
HOM001403	3	3	3	4	4	7	3	7	7	3	4	6	3	5	3	3	6	3	2
HOM001404	47	37	0	0	0	0	0	0	0	0	0	0	0	0	0	0	0	7	8
HOM001405	5	5	3	3	3	7	6	7	4	3	3	4	4	3	4	4	4	5	9
HOM001407	4	3	3	2	1	9	9	7	4	2	5	4	2	4	4	4	5	4	6
HOM001408	4	4	8	3	2	6	4	2	4	5	5	6	5	8	1	3	7	1	1
HOM001410	3	4	2	5	6	7	3	12	4	2	3	4	3	2	5	3	3	5	5
HOM001413	2	2	6	2	1	4	2	5	2	1	10	3	2	9	2	2	5	2	2
HOM001415	3	3	3	4	3	10	5	7	7	4	3	10	4	3	4	2	5	1	1
HOM001416	3	4	3	3	5	4	10	7	4	1	5	4	4	3	3	4	4	5	5
HOM001417	3	3	3	3	2	5	7	10	3	3	3	4	3	2	3	4	5	4	2
HOM001418	2	2	3	2	14	5	3	10	4	3	2	6	2	2	2	5	2	3	3
HOM001420	5	5	3	4	6	12	5	5	6	3	1	10	3	1	4	3	2	3	6
HOM001421	2	2	4	3	2	6	4	9	4	2	3	5	9	3	3	3	3	3	3
HOM001422	4	4	3	4	3	8	3	7	6	2	4	4	3	1	3	4	5	7	6
HOM001424	8	10	1	1	9	8	2	11	4	4	2	5	3	1	2	1	3	6	6
HOM001425	3	3	5	3	3	9	1	7	8	4	4	6	4	4	4	3	6	4	5
HOM001426	3	3	7	2	2	2	2	7	8	3	6	5	8	6	3	1	3	4	2
HOM001427	2	2	3	4	3	6	3	14	4	4	3	5	5	3	3	5	4	2	3
HOM001428	4	4	5	4	4	7	5	6	4	1	3	8	5	3	4	3	5	5	5
HOM001429	3	3	3	3	3	7	4	17	2	3	2	3	2	2	2	2	6	4	4
HOM001430	5	3	3	5	5	6	7	4	7	4	2	7	3	3	3	3	3	9	13
HOM001432	6	5	3	1	3	6	5	9	4	3	2	5	3	2	3	2	4	7	8
HOM001433	5	4	3	4	3	5	2	9	3	3	4	4	3	4	4	4	3	8	7
HOM001434	5	5	6	3	3	8	4	5	3	8	4	3	3	4	3	3	4	4	5
HOM001435	3	3	3	3	3	10	7	9	3	3	3	7	3	3	3	4	5	5	7
HOM001437	2	2	3	1	3	5	1	9	6	9	5	4	3	3	5	3	3	3	3
HOM001438	2	2	4	2	2	6	5	4	4	2	5	3	3	4	4	3	6	2	2
HOM001439	3	2	5	4	1	8	3	2	1	10	8	4	1	8	1	1	9	1	1
HOM001440	1	1	1	3	2	2	4	7	1	6	3	2	1	1	1	1	36	2	2
HOM001441	3	3	9	2	2	5	19	5	3	4	3	4	2	2	3	3	3	3	2
HOM001442	3	3	4	2	6	5	2	6	5	1	5	4	3	4	3	3	5	1	2
HOM001443	3	3	3	3	3	10	3	7	7	2	3	6	4	2	3	3	5	3	3
HOM001444	3	3	3	3	3	8	1	5	4	1	3	3	3	3	3	3	5	4	4
HOM001445	3	3	4	3	4	9	5	6	5	2	7	6	3	5	3	3	3	6	5
HOM001446	3	2	6	2	3	8	1	9	5	4	6	3	3	6	3	4	7	1	1
HOM001447	3	3	3	1	3	5	4	6	4	1	3	4	3	3	4	3	2	3	4
HOM001448	2	3	4	4	4	5	3	6	3	3	3	4	3	3	3	4	3	3	2
HOM001449	3	3	2	3	2	5	2	9	5	2	4	3	4	1	4	3	2	4	3
HOM001450	4	5	3	3	5	5	0	14	4	3	3	7	2	8	3	3	3	4	1
HOM001451	3	3	2	3	2	6	2	9	3	2	2	4	2	2	2	3	2	4	2
HOM001452	6	6	2	2	3	6	5	9	3	7	3	6	3	3	3	2	6	3	3
HOM001453	2	2	2	2	2	3	7	23	4	2	2	4	2	2	2	2	4	2	2
HOM001454	2	2	3	2	2	4	3	26	3	1	3	2	2	3	2	2	5	5	7
HOM001455	3	2	4	2	5	6	3	10	5	1	5	3	2	3	3	2	4	2	2
HOM001456	4	4	3	2	2	6	3	11	4	2	3	2	2	2	2	3	6	2	3
HOM001457	6	6	4	2	2	9	6	6	6	1	4	4	2	9	2	2	5	3	4
HOM001458	7	4	3	4	3	9	4	0	6	7	3	8	3	4	3	3	3	3	3
HOM001459	2	2	2	4	2	8	3	8	3	3	2	5	3	2	3	5	3	3	3
HOM001460	6	2	2	4	5	7	4	6	4	4	2	8	3	1	4	5	5	3	3
HOM001461	2	3	3	4	3	5	2	5	3	3	2	4	3	2	4	3	7	2	1
HOM001462	2	2	3	3	1	7	3	4	4	1	4	5	2	3	2	2	5	2	2
HOM001463	2	2	6	2	1	5	3	4	4	2	15	2	2	4	3	3	2	4	4
HOM001464	3	3	3	3	3	6	6	8	4	1	2	8	3	4	3	3	4	6	6
HOM001465	6	5	2	3	6	10	6	10	3	3	3	3	5	3	4	1	4	1	0
HOM001468	4	4	2	4	3	4	6	6	4	4	2	4	3	4	4	3	3	2	6
HOM001469	4	4	3	4	2	9	3	2	9	5	3	7	2	3	2	7	3	3	4
HOM001470	5	5	2	2	3	8	3	5	4	4	1	5	5	3	3	5	5	3	4
HOM001471	5	4	6	2	4	6	1	19	4	2	3	4	2	3	2	2	3	2	2
HOM001472	1	2	0	0	14	3	8	24	2	21	0	2	2	0	1	0	0	2	4
HOM001473	3	3	5	2	2	4	1	8	6	8	5	4	3	3	2	3	4	3	3
HOM001475	3	2	4	1	3	6	3	9	4	2	6	5	3	4	3	3	4	1	1
HOM001476	8	4	2	3	6	9	5	12	5	1	2	5	2	1	3	3	2	4	5
HOM001477	4	4	3	3	4	9	5	5	4	2	3	5	3	2	5	3	5	3	3
HOM001478	2	2	2	2	2	5	2	6	3	4	2	4	1	1	2	3	3	1	1
HOM001479	3	4	3	3	4	9	2	4	3	4	3	4	3	4	3	3	8	4	4
HOM001480	1	3	2	5	1	7	4	9	5	6	3	3	4	2	2	4	4	3	3
HOM001481	5	5	3	4	3	4	2	11	4	4	5	6	3	3	3	3	3	6	8
HOM001482	2	2	1	2	6	6	5	19	3	2	2	3	4	0	3	2	2	1	1
HOM001483	3	3	3	3	2	4	1	5	3	2	2	3	3	3	2	3	8	4	4
HOM001484	7	5	2	3	3	8	4	7	6	3	2	6	3	1	3	3	1	4	4
HOM001485	3	3	2	3	5	4	5	6	3	5	2	3	2	3	7	2	2	3	4
HOM001486	2	3	2	2	4	4	2	14	3	3	4	4	1	3	2	2	5	2	2
HOM001487	5	4	5	4	4	10	3	6	4	2	3	5	4	6	4	3	4	5	4
HOM001488	3	3	6	2	3	16	2	4	4	4	4	5	2	5	3	1	7	2	2
HOM001489	3	3	2	3	3	8	6	8	4	3	5	4	3	1	3	3	3	3	3
HOM001490	5	4	3	2	3	7	2	7	3	3	3	6	5	3	4	4	4	4	4
HOM001492	6	5	3	3	3	9	4	10	7	1	2	9	4	2	4	3	2	5	5
HOM001493	2	2	3	2	3	8	4	3	4	3	3	4	2	4	4	3	6	2	2
HOM001494	3	3	2	3	7	5	3	6	4	1	2	8	4	3	5	2	3	2	2
HOM001495	4	5	4	3	3	7	2	11	5	1	5	5	5	3	5	5	3	3	2
HOM001497	32	2	2	3	2	1	3	7	4	1	1	6	1	1	2	1	1	5	8
HOM001498	2	2	5	3	2	10	5	5	3	3	6	3	1	5	2	2	7	7	7
HOM001499	3	3	3	3	4	5	2	8	4	4	3	7	2	3	3	3	4	2	2
HOM001500	3	3	4	2	2	8	1	10	4	4	4	5	4	5	2	2	5	3	3
HOM001501	1	1	9	1	1	2	1	5	3	1	10	2	1	15	1	2	5	1	1
HOM001502	3	3	2	1	3	5	3	15	5	3	4	6	3	2	3	3	2	3	3
HOM001503	4	4	4	3	4	6	3	8	4	2	2	5	5	3	0	2	2	4	4
HOM001505	5	5	3	2	6	6	2	6	3	3	3	4	2	3	4	3	6	11	12
HOM001506	2	2	5	2	4	5	3	6	3	0	3	4	2	5	3	2	5	2	2
HOM001507	4	3	2	3	2	8	8	8	2	6	2	4	4	2	2	3	4	5	7
HOM001508	3	4	4	1	3	10	2	6	2	3	4	3	3	3	2	4	4	2	2
HOM001509	1	2	1	2	5	10	3	7	1	26	1	1	6	2	1	1	2	1	0
HOM001510	3	3	3	4	1	3	3	8	5	2	7	5	2	3	2	2	2	3	3
HOM001511	4	4	3	4	3	6	3	4	5	3	3	5	3	3	4	2	4	4	1
HOM001512	4	4	2	3	4	2	2	15	4	2	7	3	4	1	2	3	2	4	4
HOM001514	2	2	3	4	2	2	1	14	2	15	2	2	1	6	1	2	5	1	1
HOM001515	4	5	6	3	2	5	3	4	7	2	3	5	7	2	4	1	10	4	4
HOM001517	4	3	5	3	4	8	4	7	3	7	1	6	4	4	2	3	4	9	16
HOM001518	4	4	3	2	3	5	5	5	3	0	4	3	2	2	2	2	7	3	2
HOM001519	2	2	2	2	3	7	4	10	5	2	3	4	2	3	2	2	9	2	2
HOM001520	5	2	2	2	3	6	5	5	3	2	3	4	2	3	2	7	3	4	5
HOM001521	6	6	3	2	6	8	1	3	4	2	3	4	5	2	4	3	5	7	7
HOM001522	3	3	2	2	3	5	3	6	3	2	2	7	2	2	2	3	4	4	3
HOM001523	3	4	3	2	3	5	2	11	3	4	3	4	2	3	3	6	4	7	6
HOM001524	3	3	2	2	2	6	4	11	6	8	4	5	2	0	2	3	2	2	2
HOM001525	2	2	3	2	1	4	2	22	2	1	3	4	2	3	2	2	5	2	1
HOM001526	3	3	2	2	4	6	2	11	4	6	2	4	2	2	2	5	3	2	0
HOM001527	5	4	2	3	3	5	3	7	3	2	4	4	3	3	3	3	5	6	5
HOM001528	5	4	3	3	2	6	3	6	4	2	3	3	2	6	5	5	10	4	4
HOM001529	6	5	2	2	2	7	4	22	3	0	2	4	2	6	2	2	4	8	8
HOM001530	4	3	3	3	6	4	1	12	5	2	4	4	3	3	3	2	7	3	2
HOM001532	3	3	3	3	2	9	3	5	5	3	3	6	2	3	3	4	3	3	2
HOM001533	3	3	5	4	3	7	3	6	2	2	5	5	2	5	3	3	5	3	2
HOM001535	4	5	0	5	6	2	2	13	7	4	0	9	5	0	3	1	0	2	1
HOM001536	8	6	4	3	2	8	3	6	5	4	3	4	4	3	3	2	4	4	4
HOM001537	2	2	4	0	6	5	2	15	4	1	6	5	3	4	4	1	3	1	1
HOM001538	3	3	2	2	5	4	1	13	4	2	2	3	2	2	2	2	3	2	2
HOM001539	3	3	2	4	2	6	3	7	3	5	2	3	2	3	3	3	4	3	3
HOM001540	3	3	3	2	5	7	2	13	5	4	3	6	2	3	4	3	3	3	3
HOM001541	3	3	3	2	4	4	4	4	2	1	3	4	4	3	4	2	5	2	3
HOM001542	1	1	2	1	1	4	2	23	3	1	3	5	2	2	3	5	3	1	0
HOM001543	3	3	2	2	2	6	2	8	5	1	2	5	3	1	4	5	4	2	3
HOM001544	4	4	2	2	2	8	4	6	3	3	2	3	3	3	3	2	4	4	4
HOM001545	3	2	3	3	2	7	4	5	5	1	4	4	5	3	3	5	4	1	0
HOM001546	3	3	3	3	2	4	1	8	5	6	4	4	2	1	3	3	6	2	1
HOM001547	3	3	2	3	4	8	5	11	3	3	2	6	4	3	3	2	4	3	4
HOM001548	3	3	4	3	2	7	8	6	5	1	4	4	3	4	2	2	4	2	1
HOM001549	1	4	5	5	3	5	4	12	5	2	4	5	3	4	3	3	3	3	3
HOM001550	2	3	3	3	2	8	1	4	5	8	3	9	6	3	5	3	5	2	1
HOM001551	4	4	3	4	2	5	3	8	3	5	3	6	3	1	3	3	3	4	2
HOM001553	4	4	5	3	4	6	4	4	4	3	4	4	4	4	3	3	5	4	4
HOM001555	3	3	3	3	2	5	1	7	3	1	4	3	4	4	5	2	4	3	3
HOM001556	2	4	4	7	2	8	6	8	4	3	2	4	2	3	3	3	3	8	6
HOM001557	4	3	3	3	4	6	2	5	3	2	4	8	5	3	2	3	7	4	4
HOM001558	3	3	2	7	4	6	4	8	2	5	2	3	4	3	2	2	3	6	10
HOM001559	3	3	2	3	2	7	4	7	7	5	2	6	3	3	3	3	3	4	3
HOM001560	1	1	1	1	3	8	8	20	2	11	1	2	5	1	3	2	1	1	1
HOM001561	1	2	1	1	51	4	2	2	2	2	1	2	1	1	1	0	1	1	0
HOM001562	5	5	3	3	2	10	2	2	6	2	4	7	3	3	4	3	4	5	5
HOM001563	3	3	2	2	2	5	4	9	4	2	2	4	2	2	2	3	3	2	4
HOM001564	3	2	3	3	3	8	3	8	5	3	3	4	3	3	3	2	7	3	3
HOM001566	3	3	4	2	2	7	3	14	3	2	4	3	3	2	2	2	3	4	4
HOM001567	4	4	1	2	3	8	4	21	6	2	1	4	2	1	2	2	3	3	6
HOM001568	4	3	2	2	4	7	4	11	3	3	2	5	3	3	4	3	2	3	3
HOM001569	3	3	2	2	2	6	5	6	6	4	3	10	4	2	3	3	5	4	3
HOM001570	3	4	3	2	3	6	3	6	3	3	4	4	2	3	2	2	4	4	3
HOM001571	2	3	2	2	3	5	4	10	6	3	4	7	3	3	3	3	4	2	2
HOM001572	2	2	4	2	3	4	3	6	4	4	4	5	2	5	3	3	5	2	2
HOM001573	3	3	3	4	6	6	3	5	4	2	3	5	3	3	3	3	5	3	3
HOM001574	3	4	2	4	2	3	2	9	3	1	4	4	2	3	2	4	3	3	2
HOM001575	7	5	1	1	6	6	5	6	4	0	8	9	3	1	3	1	1	3	3
HOM001576	3	1	2	2	12	7	1	7	2	2	5	2	6	7	4	3	3	3	8
HOM001577	3	3	3	3	3	3	1	7	3	2	3	4	4	2	3	3	3	3	2
HOM001579	3	3	3	2	2	4	6	19	3	4	2	3	2	2	3	2	3	2	2
HOM001580	4	3	4	2	2	5	3	6	3	2	4	3	2	4	2	2	9	2	3
HOM001581	3	1	2	2	3	6	2	15	6	1	2	5	5	2	4	4	3	1	1
HOM001582	2	2	7	3	3	5	5	7	4	4	3	2	3	4	6	2	2	2	2
HOM001583	3	3	5	2	2	7	2	4	3	2	6	3	8	3	2	2	7	4	4
HOM001584	3	2	2	3	2	6	7	6	3	4	3	4	2	3	2	3	4	3	4
HOM001585	3	2	4	1	2	10	4	0	2	8	2	5	1	4	2	2	10	1	0
HOM001586	2	2	3	3	2	4	1	6	2	2	3	3	6	3	6	2	3	2	2
HOM001587	8	6	3	2	3	8	4	7	4	2	2	5	2	2	3	3	2	6	6
HOM001588	3	2	2	4	2	6	2	7	4	3	2	5	3	2	3	3	3	3	3
HOM001589	6	2	3	2	1	4	4	9	2	2	3	3	2	3	2	3	5	3	4
HOM001590	3	3	3	2	3	6	1	5	5	3	3	6	2	3	3	2	6	3	2
HOM001591	3	3	3	2	2	5	2	15	4	1	3	3	2	3	2	2	4	2	2
HOM001592	3	3	3	3	2	8	2	5	6	2	6	3	4	4	3	2	4	2	2
HOM001593	3	2	2	2	15	3	4	9	2	8	2	2	2	2	2	3	2	4	8
HOM001594	3	3	3	3	3	4	3	9	5	1	4	5	3	4	4	3	4	3	4
HOM001595	3	3	3	2	1	4	1	5	4	5	3	4	3	3	3	3	5	3	2
HOM001597	4	4	2	2	2	4	1	11	1	0	1	2	2	1	2	2	1	5	6
HOM001598	2	2	7	3	3	7	4	10	3	3	3	3	2	3	2	2	3	3	6
HOM001599	0	1	1	1	0	1	3	1	2	46	3	1	0	2	1	6	1	1	1
HOM001600	2	2	4	2	2	5	0	6	3	1	9	2	2	3	2	2	3	2	2
HOM001601	7	10	5	1	2	4	5	6	3	4	5	6	4	2	3	2	1	2	2
HOM001603	3	3	2	4	3	6	2	13	6	3	2	2	3	2	3	3	2	2	3
HOM001604	4	4	5	6	2	3	2	6	5	2	4	5	3	4	3	4	4	7	6
HOM001605	3	3	2	2	2	7	2	5	4	4	2	5	3	5	3	4	4	2	2
HOM001606	7	5	2	3	2	7	5	7	3	2	2	6	2	2	4	2	5	8	8
HOM001607	3	2	4	2	2	4	2	9	6	2	3	4	1	5	3	1	6	2	2
HOM001608	3	3	3	3	4	8	3	4	4	3	3	4	2	3	2	2	4	2	2
HOM001609	7	4	3	5	4	6	2	7	4	3	3	7	4	3	3	3	2	3	6
HOM001610	3	3	3	2	2	6	2	5	2	4	4	4	3	4	3	2	7	3	3
HOM001611	3	3	2	1	1	2	2	15	3	0	4	2	1	4	2	2	9	2	2
HOM001612	3	3	2	3	2	7	2	9	5	3	2	4	2	2	3	3	4	3	3
HOM001613	5	5	3	2	2	8	3	2	4	4	3	4	2	3	2	2	3	5	9
HOM001614	2	2	2	6	2	2	5	5	2	1	2	4	3	3	4	2	5	3	2
HOM001615	4	3	3	2	3	6	3	3	2	4	3	4	3	1	2	2	2	2	2
HOM001616	3	3	2	2	2	4	1	8	2	4	2	2	2	2	2	2	3	3	3
HOM001617	2	2	2	4	3	6	3	8	3	4	2	6	3	2	3	2	1	3	2
HOM001618	1	1	2	2	5	8	7	8	4	3	2	6	2	1	2	2	7	1	1
HOM001619	8	6	4	3	1	8	2	6	4	3	3	5	1	5	3	1	3	7	12
HOM001620	2	2	2	1	2	12	2	10	5	1	2	10	3	2	2	5	3	2	0
HOM001621	2	2	5	2	4	7	1	6	5	2	3	5	3	2	3	3	5	2	2
HOM001622	3	3	3	4	3	6	3	10	4	0	2	3	3	4	3	3	2	2	2
HOM001623	3	3	2	2	1	9	2	5	3	2	4	4	4	4	3	2	6	1	3
HOM001624	1	1	2	4	1	5	6	13	3	5	3	4	1	3	1	1	6	4	4
HOM001626	3	4	3	3	2	9	4	7	4	2	3	7	3	3	3	3	3	5	6
HOM001627	2	2	2	2	4	5	6	6	2	4	4	3	2	2	2	2	2	3	3
HOM001628	2	2	3	2	4	6	3	7	3	4	2	5	5	3	2	2	3	3	2
HOM001629	3	3	3	4	4	9	4	7	3	4	3	2	2	2	2	5	2	4	4
HOM001630	1	1	4	1	3	6	4	2	3	2	4	3	3	3	3	3	11	1	1
HOM001631	5	3	1	21	2	2	1	3	4	0	2	5	4	1	2	2	2	1	1
HOM001632	3	3	3	3	5	5	4	8	4	1	3	4	3	3	3	3	2	4	4
HOM001633	2	3	2	1	4	4	4	4	5	0	3	6	2	5	5	2	3	1	0
HOM001634	24	8	2	2	2	4	2	7	1	1	1	2	1	2	1	3	2	3	3
HOM001635	3	3	2	2	4	8	2	6	2	4	4	4	4	3	4	2	3	3	2
HOM001636	3	3	3	4	4	5	5	3	3	5	4	3	3	5	2	2	4	3	5
HOM001638	4	4	3	3	3	9	2	5	6	0	2	5	3	4	6	4	4	4	3
HOM001639	3	3	2	4	5	6	2	7	4	4	2	2	3	4	2	15	2	2	5
HOM001640	2	2	3	2	2	11	3	7	4	4	3	3	2	3	2	2	8	2	1
HOM001641	4	3	2	3	3	10	3	5	5	2	2	6	4	2	3	3	4	2	2
HOM001642	16	6	2	3	2	6	5	7	2	4	2	4	2	0	1	2	1	2	2
HOM001643	2	2	2	2	4	4	2	13	4	4	2	4	2	3	4	2	4	1	1
HOM001644	2	2	2	2	2	4	3	11	3	5	2	3	3	2	2	2	3	4	3
HOM001645	3	4	3	2	1	7	2	4	3	6	6	3	3	3	2	1	3	3	2
HOM001646	3	6	2	3	1	5	5	7	2	1	4	4	2	6	2	1	3	3	3
HOM001647	3	4	3	3	3	5	2	5	4	2	3	3	3	3	3	3	3	2	2
HOM001648	2	2	4	3	3	9	2	4	4	4	5	4	2	4	3	3	3	1	1
HOM001649	3	4	3	2	3	7	3	7	5	3	2	6	4	5	3	2	7	3	1
HOM001650	3	2	2	1	3	7	7	4	2	3	2	2	3	2	2	2	5	2	1
HOM001651	3	3	6	2	2	8	2	6	4	2	5	4	1	6	2	2	8	3	3
HOM001652	3	3	2	3	3	8	4	7	5	4	2	4	3	2	3	6	3	5	6
HOM001653	2	2	4	3	4	7	4	6	2	3	6	4	3	3	3	3	5	2	3
HOM001654	2	2	3	3	3	10	0	7	4	8	3	5	3	4	3	1	4	2	1
HOM001655	2	3	3	3	1	4	2	5	6	0	3	4	2	2	3	6	3	6	0
HOM001656	3	2	2	2	4	3	2	4	4	2	4	7	2	2	2	3	2	2	2
HOM001657	3	3	3	2	3	4	5	10	3	5	3	4	2	3	2	2	3	3	2
HOM001658	3	3	3	2	2	8	6	3	4	4	3	4	2	3	2	2	7	3	3
HOM001660	6	6	4	3	1	2	1	6	6	0	2	4	1	4	3	2	4	3	3
HOM001661	2	3	2	2	2	8	4	7	4	7	2	6	2	2	3	7	3	3	2
HOM001662	1	1	3	3	3	6	5	3	2	4	4	3	5	3	2	2	4	1	1
HOM001663	4	4	2	3	3	7	4	7	5	1	3	6	3	3	3	2	4	3	3
HOM001664	4	4	4	2	2	9	1	4	4	5	5	2	2	5	2	3	8	3	3
HOM001666	2	3	2	2	3	7	4	4	4	4	3	4	2	2	3	5	2	2	0
HOM001667	2	2	3	3	2	4	2	8	2	3	2	5	2	3	2	7	5	2	2
HOM001668	3	3	3	4	0	3	3	1	3	2	3	8	3	4	3	2	5	5	9
HOM001669	3	3	2	4	1	4	4	10	4	3	3	3	2	3	4	2	3	3	3
HOM001670	3	3	2	2	3	5	4	12	2	2	3	3	3	2	2	3	2	2	2
HOM001671	4	4	2	1	4	8	4	7	6	3	2	5	4	3	3	3	3	3	6
HOM001672	3	1	2	2	3	7	1	4	5	1	5	8	3	5	7	3	5	2	2
HOM001674	2	2	3	2	2	4	6	6	4	4	2	2	3	2	2	3	4	2	1
HOM001675	3	3	3	2	3	3	1	7	2	4	2	7	3	1	3	2	5	2	2
HOM001677	4	3	3	1	3	5	3	12	3	1	3	5	2	3	3	2	1	2	4
HOM001678	2	2	2	3	3	11	5	9	5	1	2	7	2	2	3	3	3	3	3
HOM001679	4	3	3	5	3	4	5	6	3	3	2	2	3	3	3	5	3	8	10
HOM001680	4	2	4	2	2	5	4	5	6	2	4	4	3	4	3	5	4	2	2
HOM001681	3	2	3	2	3	3	5	3	2	12	2	3	2	2	1	2	4	2	1
HOM001683	2	2	9	1	1	2	1	2	2	0	14	2	1	6	1	3	6	3	0
HOM001684	5	4	2	2	4	7	2	8	3	3	2	4	1	2	4	4	2	4	4
HOM001685	4	4	2	5	3	5	4	7	3	2	3	3	2	2	2	3	2	5	4
HOM001686	3	4	2	3	3	8	1	9	6	3	3	7	3	2	2	4	5	2	2
HOM001687	4	4	4	2	2	6	1	4	3	4	4	4	2	5	2	2	7	4	4
HOM001688	4	4	0	3	4	10	4	13	6	4	0	6	3	0	3	3	1	2	1
HOM001690	2	2	2	1	2	4	2	5	2	2	8	4	3	6	2	3	4	2	2
HOM001691	3	4	2	2	4	6	1	9	3	2	3	3	3	2	3	11	2	4	2
HOM001692	1	1	3	1	2	7	7	6	3	12	4	2	1	4	1	1	3	1	1
HOM001693	1	1	2	0	1	2	1	3	2	1	1	2	1	2	1	1	1	1	3
HOM001694	3	3	3	2	2	4	2	5	4	3	4	4	3	5	3	5	9	2	2
HOM001695	4	4	5	3	3	5	2	4	4	3	4	4	3	5	3	3	3	2	2
HOM001696	3	3	3	3	1	8	2	2	2	2	3	2	2	10	3	2	4	4	3
HOM001697	3	4	2	2	1	4	4	10	2	5	2	4	2	2	2	2	2	3	8
HOM001698	3	3	4	3	2	6	2	7	6	6	3	4	2	3	1	2	4	11	5
HOM001700	3	2	1	2	2	8	9	9	3	5	1	4	2	2	2	5	2	4	7
HOM001701	5	5	3	2	2	4	4	5	3	4	3	2	2	5	2	2	7	3	2
HOM001702	1	1	2	2	3	7	2	6	4	2	5	5	3	4	4	2	5	1	1
HOM001703	4	3	2	2	2	6	9	8	3	3	3	4	2	3	2	3	3	14	17
HOM001705	3	2	5	1	2	4	2	3	3	6	4	3	2	4	2	3	5	2	2
HOM001706	6	5	4	1	2	4	4	5	1	4	0	4	2	4	2	3	4	2	3
HOM001708	6	2	2	2	2	7	4	8	3	3	3	4	2	2	2	4	2	2	2
HOM001709	3	3	2	2	2	7	1	8	4	4	2	3	2	3	2	2	3	6	6
HOM001710	2	4	3	4	3	8	3	4	6	5	2	6	3	4	4	1	4	8	6
HOM001711	3	2	2	3	2	7	4	10	2	1	2	3	2	3	2	4	3	3	4
HOM001712	3	3	3	4	3	6	3	8	6	2	3	6	3	3	3	3	3	3	2
HOM001713	2	2	2	3	2	7	2	8	2	3	2	2	2	3	2	4	6	4	4
HOM001714	6	4	2	2	2	7	4	8	3	1	2	4	2	3	2	4	7	4	7
HOM001715	6	4	4	4	5	4	2	5	5	1	3	4	2	3	2	3	4	6	6
HOM001716	5	5	3	2	2	6	2	2	4	3	2	3	3	2	4	4	1	4	3
HOM001717	3	3	2	2	5	6	3	7	5	2	2	6	3	1	4	2	5	3	3
HOM001718	3	3	3	3	2	4	1	18	5	2	3	4	3	3	2	2	2	3	4
HOM001721	3	2	2	4	4	4	6	6	3	5	2	3	4	2	3	3	2	1	3
HOM001722	4	3	2	3	3	4	4	7	4	3	3	4	2	3	4	2	3	2	2
HOM001723	5	3	3	2	4	6	0	8	3	2	3	4	2	3	2	3	4	2	1
HOM001725	2	2	3	1	5	2	1	2	3	1	11	6	2	4	2	1	5	5	3
HOM001726	8	3	2	2	2	4	5	10	4	2	1	5	2	2	1	1	4	2	1
HOM001728	3	5	4	2	2	5	6	2	4	1	4	4	2	5	3	2	8	7	5
HOM001730	1	1	3	1	13	3	2	5	3	3	4	3	7	2	2	1	4	1	1
HOM001731	4	3	2	2	2	4	4	6	4	2	2	6	5	2	2	5	1	5	5
HOM001732	4	4	3	3	3	8	2	6	4	6	3	5	3	3	3	3	2	4	5
HOM001734	2	2	2	1	2	6	5	8	3	6	3	3	2	2	2	2	9	3	1
HOM001735	6	4	4	2	3	6	1	11	3	1	2	4	2	0	2	2	5	4	3
HOM001736	4	3	4	2	2	4	3	4	3	1	4	2	3	4	5	5	6	3	3
HOM001737	4	4	2	3	2	4	2	4	3	2	3	4	2	3	2	6	8	5	2
HOM001738	3	3	4	2	2	6	2	13	4	4	3	3	2	3	2	3	5	4	5
HOM001739	1	1	2	4	5	4	4	11	3	5	2	4	3	1	3	6	1	1	1
HOM001740	5	2	3	3	4	6	5	8	4	1	2	5	2	1	2	2	2	3	4
HOM001741	3	3	4	4	2	6	4	6	4	3	3	4	3	2	4	3	4	2	1
HOM001742	3	3	2	2	3	4	2	8	2	4	2	3	2	3	2	2	5	4	3
HOM001743	2	2	3	2	3	7	3	9	3	2	2	3	2	2	2	2	2	2	2
HOM001744	3	3	2	2	5	5	1	7	5	2	2	4	2	3	2	3	6	2	1
HOM001745	4	3	5	3	2	6	1	5	3	0	4	5	3	5	3	2	4	3	3
HOM001746	2	2	5	2	2	7	2	8	4	2	3	5	2	2	2	3	7	2	2
HOM001747	7	5	2	1	4	2	1	9	1	5	4	4	2	3	2	2	1	4	2
HOM001748	2	2	1	1	5	4	2	16	2	2	1	3	3	1	2	5	2	4	4
HOM001749	5	4	1	1	4	7	6	11	3	1	2	1	2	2	1	1	3	6	3
HOM001750	4	2	2	2	1	5	3	8	2	3	2	3	4	4	2	3	2	3	2
HOM001751	5	3	2	2	2	8	1	4	4	3	2	7	3	2	3	2	2	3	3
HOM001752	3	2	0	1	43	3	0	2	2	1	0	2	1	0	1	1	0	2	2
HOM001753	2	2	2	3	2	7	4	5	4	2	2	5	5	1	3	3	4	2	1
HOM001754	0	2	3	2	4	3	7	1	2	3	5	3	2	5	2	2	8	3	4
HOM001755	3	2	3	2	1	5	1	4	2	6	5	4	2	3	3	2	5	1	0
HOM001756	2	2	2	3	3	4	1	15	3	1	2	4	2	2	2	2	2	2	1
HOM001757	4	3	3	4	4	5	2	4	4	3	3	8	2	3	3	3	2	4	5
HOM001758	2	2	4	3	2	7	2	7	2	3	5	5	2	5	2	2	6	3	2
HOM001759	4	2	2	5	3	4	4	8	4	2	2	5	3	2	3	4	2	4	5
HOM001760	7	3	2	2	2	4	3	8	2	1	2	4	3	2	3	4	2	4	3
HOM001761	3	4	1	3	3	5	11	7	4	3	2	4	3	1	4	3	1	2	2
HOM001762	2	2	4	2	1	2	1	4	4	7	5	3	3	3	2	1	4	3	2
HOM001763	3	3	3	3	4	4	1	7	5	0	3	4	3	3	3	2	5	2	1
HOM001764	3	4	2	4	2	5	5	9	4	1	2	2	2	2	3	2	2	3	3
HOM001765	7	5	2	3	3	6	0	9	3	2	2	7	5	2	2	3	2	5	7
HOM001766	4	5	1	2	2	8	2	7	11	5	1	7	3	1	2	2	2	4	3
HOM001767	3	3	3	2	2	5	2	4	3	1	3	3	2	3	2	2	9	3	3
HOM001768	3	3	1	3	2	5	5	13	3	2	2	5	3	1	3	6	1	3	6
HOM001769	3	3	2	3	1	4	4	3	4	2	2	8	4	2	2	3	3	5	5
HOM001770	5	3	2	2	2	4	8	8	3	6	1	3	2	1	2	3	3	2	2
HOM001771	6	6	2	3	4	1	3	2	2	2	3	9	4	4	1	4	4	5	8
HOM001772	2	3	2	4	3	7	3	3	5	0	2	6	5	2	4	3	1	3	3
HOM001773	4	3	3	2	3	6	2	6	2	3	5	3	2	3	3	2	3	3	2
HOM001774	2	2	4	2	3	5	4	5	4	3	4	4	3	5	2	3	5	1	2
HOM001776	4	4	2	0	2	6	1	7	4	6	3	4	2	2	3	2	4	2	1
HOM001777	2	2	3	2	3	3	4	5	5	5	3	4	2	1	1	1	3	3	3
HOM001778	3	3	3	3	6	7	3	6	5	2	2	5	3	2	3	2	3	2	2
HOM001779	1	1	3	2	2	5	2	5	3	3	2	3	2	3	2	4	2	1	1
HOM001780	1	1	2	3	1	4	5	3	2	2	2	1	1	1	1	1	1	2	2
HOM001781	7	7	2	3	5	6	1	8	5	1	2	4	3	2	3	3	2	3	2
HOM001782	4	4	1	2	9	2	3	11	2	5	3	2	2	2	2	1	2	2	2
HOM001783	2	2	2	3	3	6	3	6	6	1	2	5	3	3	3	4	6	5	6
HOM001784	3	3	4	1	9	4	2	6	3	0	5	4	1	6	2	1	4	4	3
HOM001785	21	6	1	2	2	5	3	6	3	0	1	5	1	2	3	2	2	5	6
HOM001787	7	4	2	4	2	4	1	13	4	3	2	4	2	2	2	2	5	3	1
HOM001788	2	3	3	6	3	6	3	5	4	2	3	5	2	3	3	3	4	2	1
HOM001789	2	2	1	10	2	4	3	9	2	5	1	4	2	1	4	3	1	5	5
HOM001790	2	3	3	3	3	5	2	5	4	4	3	5	2	2	3	3	4	5	3
HOM001791	7	4	2	2	1	4	2	13	4	2	4	2	4	3	4	2	4	2	2
HOM001792	3	2	0	2	4	5	2	9	6	4	0	9	3	6	2	4	3	2	2
HOM001793	1	1	3	1	6	4	1	6	2	0	6	3	3	3	2	3	4	1	1
HOM001794	2	2	2	2	2	4	4	6	4	14	2	5	2	5	2	2	2	2	5
HOM001795	5	2	2	3	2	5	3	7	1	3	2	4	2	2	2	3	2	2	3
HOM001796	4	3	5	3	2	2	7	11	3	4	2	2	2	2	1	1	3	3	4
HOM001797	2	2	3	2	3	4	3	4	4	3	2	4	3	3	3	2	2	3	2
HOM001798	2	2	4	2	8	6	5	5	2	1	3	2	3	4	4	1	2	1	2
HOM001799	4	4	3	2	2	3	1	6	3	3	3	5	3	4	3	2	5	6	7
HOM001800	3	3	3	3	2	3	1	18	2	1	3	3	2	2	2	1	5	2	2
HOM001801	3	3	2	3	2	6	2	2	4	2	4	5	2	2	3	3	4	3	1
HOM001802	4	4	3	2	2	8	2	3	4	4	3	4	2	3	3	5	5	6	8
HOM001803	3	6	3	2	2	4	1	6	3	1	3	3	2	3	2	2	3	4	3
HOM001804	13	14	3	1	1	4	2	2	1	12	2	2	1	2	1	1	2	6	7
HOM001805	2	3	2	3	2	5	6	8	2	2	2	7	2	2	2	2	3	8	9
HOM001806	2	2	2	3	5	3	4	2	3	1	3	4	2	2	4	2	3	3	2
HOM001807	2	2	2	3	2	4	7	5	3	2	2	2	3	2	2	2	3	2	2
HOM001808	5	4	2	2	4	10	0	5	5	2	2	5	3	0	3	3	3	6	4
HOM001810	2	2	2	3	3	5	3	14	3	2	2	5	2	3	3	2	4	3	3
HOM001811	5	5	2	3	3	8	4	6	3	2	3	4	3	2	3	3	2	9	14
HOM001812	3	3	2	2	2	9	8	4	2	7	2	4	2	3	2	2	3	5	8
HOM001813	3	4	2	2	2	4	2	3	3	2	2	2	3	1	2	2	3	4	4
HOM001814	3	3	3	1	3	6	4	7	5	4	3	5	3	1	2	4	4	2	2
HOM001815	4	4	2	2	3	8	4	6	4	1	3	4	4	3	3	3	3	6	8
HOM001817	6	6	1	3	4	8	4	6	5	1	1	9	3	1	3	2	1	8	8
HOM001818	3	3	1	6	5	5	1	8	5	3	3	7	4	1	3	3	1	4	6
HOM001819	6	3	3	2	2	5	2	5	4	4	3	3	2	3	3	3	3	2	2
HOM001820	1	1	3	0	1	2	1	6	1	1	14	2	1	9	1	1	9	1	1
HOM001821	4	4	2	3	5	9	1	4	7	2	2	4	4	2	4	4	4	5	5
HOM001822	3	2	3	2	2	6	3	9	3	4	4	4	2	3	2	1	6	2	2
HOM001823	2	2	2	3	2	10	6	4	4	4	5	4	3	4	3	1	4	3	2
HOM001824	1	1	4	1	1	2	6	3	1	2	2	3	2	2	1	1	2	2	2
HOM001825	2	2	3	3	2	4	4	6	2	0	3	4	2	4	2	2	4	2	2
HOM001826	8	4	2	2	2	7	4	7	5	4	2	4	3	0	2	2	5	4	4
HOM001827	2	2	2	2	2	4	5	7	3	2	3	5	2	2	2	2	5	1	1
HOM001828	5	3	2	2	2	3	4	12	3	4	2	4	2	2	2	2	3	2	1
HOM001829	7	3	2	2	3	4	3	7	3	0	2	2	3	1	2	2	3	3	2
HOM001830	1	1	4	0	3	2	2	4	4	0	3	7	3	4	2	2	12	1	1
HOM001831	1	1	2	2	2	12	1	5	4	1	2	4	2	2	2	1	2	1	1
HOM001832	4	4	4	2	4	7	1	5	4	1	5	4	2	4	2	1	7	4	4
HOM001833	4	3	2	2	2	3	1	13	3	1	2	4	1	2	3	2	2	3	5
HOM001834	2	1	2	2	3	11	2	13	5	2	1	4	2	7	3	4	2	1	1
HOM001835	2	2	2	3	2	3	2	3	5	5	2	4	2	2	3	3	3	1	3
HOM001837	6	3	4	3	2	5	4	6	3	2	3	3	3	3	2	4	4	4	3
HOM001839	4	4	3	1	3	4	4	6	3	4	3	3	2	2	2	3	3	2	2
HOM001841	3	3	3	2	2	4	3	7	2	1	3	4	2	3	2	2	3	3	2
HOM001842	3	3	1	4	6	5	7	3	2	1	5	5	2	3	1	2	3	3	0
HOM001843	2	2	2	3	4	7	3	7	3	10	2	5	3	2	3	3	3	5	11
HOM001846	3	2	2	2	2	6	3	10	3	5	2	4	2	1	4	2	5	2	1
HOM001847	7	3	2	3	2	2	5	6	2	1	2	1	2	4	3	4	2	3	6
HOM001848	6	4	1	2	5	7	3	10	3	1	1	5	2	0	7	3	1	4	3
HOM001849	4	2	4	3	2	14	1	5	0	0	7	2	2	4	2	3	2	3	6
HOM001850	4	3	5	3	3	6	5	9	2	0	3	2	2	3	1	2	3	5	4
HOM001851	3	3	2	3	2	6	3	5	3	1	4	4	2	2	2	2	3	7	7
HOM001852	8	6	2	4	3	3	7	2	2	2	2	2	4	2	3	2	3	5	3
HOM001854	1	1	6	1	1	4	1	1	1	2	16	1	1	5	3	0	4	1	0
HOM001855	4	4	3	3	3	3	3	7	3	0	3	4	2	3	2	2	5	4	3
HOM001856	2	2	4	1	4	6	3	8	5	1	2	5	4	4	1	4	3	4	3
HOM001858	2	1	2	1	2	4	2	3	4	4	4	4	3	1	1	7	2	1	0
HOM001859	1	1	2	4	2	3	5	6	4	1	2	8	2	2	2	3	2	3	10
HOM001860	1	1	3	4	5	0	1	12	3	2	3	5	3	1	4	4	4	1	1
HOM001861	3	3	1	3	3	5	4	10	4	3	1	6	3	1	3	4	1	5	9
HOM001862	4	3	4	2	2	3	1	4	3	2	3	4	2	4	3	2	8	3	3
HOM001863	4	3	1	3	2	8	5	10	3	3	1	5	3	1	3	3	1	3	2
HOM001864	4	2	3	1	4	5	2	4	4	3	4	2	2	3	2	2	3	3	3
HOM001865	6	3	2	2	1	5	4	9	3	4	2	4	3	0	2	1	2	3	4
HOM001866	3	4	3	1	2	9	3	6	4	3	3	4	2	1	2	2	8	3	3
HOM001867	4	3	3	2	4	7	5	6	3	3	2	4	2	0	2	4	3	3	2
HOM001868	4	3	4	2	2	5	6	5	5	3	2	2	3	2	2	3	1	2	3
HOM001869	3	3	2	2	3	5	2	5	4	4	2	4	4	2	3	2	3	3	1
HOM001870	1	1	2	1	1	5	1	4	2	3	2	1	1	3	2	2	4	1	1
HOM001871	2	2	2	2	3	12	1	5	4	2	5	4	2	4	3	4	2	1	3
HOM001872	3	3	2	3	3	8	3	5	4	1	5	6	2	4	2	2	3	3	3
HOM001873	13	7	2	3	2	4	2	4	2	1	2	5	2	2	2	2	2	6	11
HOM001874	3	2	3	2	1	2	2	5	2	6	5	3	1	6	2	3	3	2	1
HOM001876	3	3	2	2	2	14	3	4	5	8	3	6	2	2	2	0	3	1	1
HOM001877	3	3	4	3	2	4	1	2	4	3	5	4	2	6	1	2	3	2	2
HOM001878	1	1	3	2	2	4	2	11	4	1	2	6	3	4	2	3	3	1	1
HOM001879	4	5	2	2	1	10	2	4	4	3	2	5	2	2	3	3	3	4	4
HOM001880	3	2	2	2	2	3	4	7	4	1	3	5	2	2	2	4	4	2	1
HOM001881	7	2	2	2	2	7	3	5	3	0	3	4	4	2	3	3	3	1	1
HOM001882	3	3	2	3	3	8	4	6	4	1	2	4	3	2	3	2	4	1	1
HOM001883	3	5	0	3	3	5	4	7	5	1	3	5	4	2	4	4	0	3	4
HOM001884	3	3	2	2	1	4	4	8	1	1	2	2	1	4	1	2	7	3	2
HOM001885	2	2	2	2	4	6	5	5	3	5	2	3	2	4	2	4	3	2	2
HOM001886	3	3	3	3	2	4	3	4	3	3	4	5	3	4	3	3	5	3	3
HOM001887	1	1	5	1	0	2	0	2	4	2	4	7	4	5	2	1	6	2	2
HOM001888	3	3	3	2	1	4	3	2	3	2	3	3	2	2	2	5	4	4	3
HOM001889	3	3	3	1	2	4	2	11	3	1	3	3	3	3	2	2	3	3	3
HOM001891	2	2	2	2	1	2	3	8	1	0	2	1	1	2	1	1	25	1	0
HOM001892	3	4	2	3	3	6	5	5	4	2	2	4	2	1	3	2	3	7	7
HOM001893	5	3	2	2	1	3	2	13	3	0	2	2	2	1	2	3	4	2	0
HOM001894	3	4	2	3	4	4	2	10	2	0	2	4	4	2	3	3	4	3	3
HOM001895	2	2	2	3	2	6	1	8	3	1	3	6	2	4	3	3	5	5	5
HOM001896	5	4	3	3	2	6	2	4	3	1	3	4	2	2	2	2	4	3	3
HOM001897	3	4	2	3	2	4	4	9	3	1	2	7	2	2	2	2	2	3	3
HOM001898	2	1	3	4	4	5	2	5	3	0	2	9	4	7	3	3	4	1	1
HOM001899	3	2	2	2	2	4	2	10	2	1	2	4	3	2	4	2	2	2	3
HOM001900	3	4	2	2	2	5	3	5	2	1	2	4	2	3	3	1	5	2	2
HOM001901	4	3	3	2	3	6	2	2	6	0	4	5	5	3	3	2	4	4	5
HOM001902	3	3	3	2	4	7	1	5	4	5	4	3	1	0	3	2	3	1	1
HOM001903	4	3	3	2	2	2	1	16	2	1	3	4	1	2	2	1	6	3	4
HOM001905	2	2	1	2	2	4	2	3	8	0	3	6	2	1	6	3	2	2	3
HOM001906	2	1	1	36	2	2	3	4	1	0	1	1	1	2	1	1	1	2	1
HOM001908	11	5	2	4	3	4	4	5	2	2	2	1	4	2	2	2	2	1	0
HOM001909	1	1	5	2	2	4	2	8	3	2	4	6	5	1	1	2	3	1	1
HOM001910	4	4	2	6	2	3	2	1	3	3	2	4	2	3	2	3	2	2	2
HOM001911	2	2	3	2	2	6	2	3	4	3	3	4	2	3	2	2	6	4	3
HOM001913	3	3	4	2	3	7	2	1	4	2	4	6	2	3	6	3	4	2	3
HOM001914	4	2	3	2	2	3	2	8	3	4	2	3	2	3	3	2	3	4	3
HOM001915	2	2	2	2	2	3	3	10	4	0	2	3	2	2	2	3	3	3	3
HOM001916	3	3	3	1	2	8	1	4	7	4	3	6	2	5	3	1	6	1	1
HOM001917	1	2	2	1	2	6	3	3	4	3	2	2	2	2	5	6	4	2	2
HOM001918	1	2	3	5	2	4	2	9	2	3	2	4	2	1	3	3	4	2	2
HOM001919	2	2	2	3	2	3	1	6	4	2	3	2	3	4	2	2	3	1	1
HOM001921	2	2	2	4	2	5	2	10	3	1	2	3	2	2	4	2	2	2	0
HOM001922	2	2	3	2	2	10	2	4	4	3	3	3	2	3	2	2	12	5	5
HOM001923	2	2	3	3	2	3	3	9	6	0	4	3	2	4	2	2	10	1	1
HOM001924	5	3	2	2	1	2	2	9	2	4	2	2	1	2	1	1	4	3	3
HOM001925	2	5	3	4	3	5	3	6	3	3	3	5	3	3	3	2	4	6	14
HOM001926	4	4	2	2	3	5	1	1	4	1	4	3	3	1	1	3	4	3	3
HOM001927	3	2	2	3	3	8	2	3	4	4	2	4	3	2	4	3	4	3	3
HOM001928	2	2	2	2	3	3	1	7	3	3	3	3	2	3	2	2	3	2	2
HOM001930	3	3	2	2	5	5	2	3	4	2	2	3	2	2	2	2	3	3	3
HOM001931	6	4	2	2	2	4	3	10	3	1	3	3	3	4	2	3	5	6	7
HOM001932	2	2	2	2	2	4	0	18	4	1	2	2	2	2	2	3	1	2	2
HOM001933	2	2	2	5	3	4	3	11	2	1	3	4	2	2	2	4	5	2	1
HOM001934	1	1	1	2	2	2	1	3	2	1	1	2	1	2	2	1	30	1	1
HOM001935	2	3	3	3	2	7	5	4	3	2	2	4	3	2	2	2	3	2	1
HOM001936	5	2	2	3	2	4	3	5	5	2	2	3	2	1	2	3	7	2	1
HOM001937	6	5	3	2	1	6	3	5	3	3	3	2	2	3	2	3	2	4	6
HOM001938	3	1	2	1	7	2	4	5	2	2	3	2	3	7	4	2	2	1	1
HOM001940	2	2	3	2	2	5	4	9	3	3	0	3	3	3	2	2	3	2	3
HOM001941	3	2	2	2	4	4	2	9	3	1	2	3	2	1	2	1	2	2	2
HOM001942	4	4	4	1	2	6	1	4	2	1	4	3	3	2	3	4	3	3	3
HOM001944	2	3	3	3	2	4	1	4	3	1	3	4	4	2	3	2	5	2	1
HOM001945	4	3	2	2	2	4	3	4	3	2	3	4	3	5	3	2	2	2	1
HOM001946	4	5	3	2	2	4	0	6	3	1	3	2	3	2	2	2	3	2	2
HOM001947	3	3	4	2	2	7	3	2	3	0	4	4	4	2	2	4	4	3	3
HOM001948	2	3	2	6	2	6	2	5	3	1	3	3	2	3	2	2	2	4	4
HOM001949	5	6	1	2	1	15	3	4	3	4	1	5	2	1	2	0	0	4	4
HOM001950	4	3	2	2	2	5	1	2	4	1	2	4	4	2	2	2	4	4	6
HOM001951	13	11	0	1	7	5	2	4	3	4	0	3	2	0	8	0	0	5	6
HOM001952	2	2	3	1	2	4	2	3	3	2	3	3	2	5	3	4	4	2	2
HOM001953	6	2	1	1	1	6	6	11	3	5	1	2	1	1	1	7	2	2	1
HOM001954	2	2	4	2	2	4	2	6	2	2	3	3	3	3	2	2	2	2	1
HOM001955	4	2	2	3	1	6	6	5	5	2	2	5	3	1	3	3	3	2	2
HOM001956	2	2	5	2	2	6	2	3	3	3	5	3	2	5	2	1	9	2	2
HOM001957	4	4	2	2	3	8	2	3	6	3	2	3	3	2	4	2	4	4	4
HOM001958	4	4	2	3	6	6	5	4	2	2	2	4	2	2	3	2	3	6	11
HOM001959	2	2	2	2	1	2	2	12	1	2	2	2	2	3	3	2	2	2	2
HOM001960	4	2	1	4	7	2	3	4	2	2	2	3	2	6	1	4	2	3	4
HOM001961	3	3	2	2	2	5	2	3	4	3	2	4	2	3	3	3	2	4	2
HOM001962	3	3	1	2	1	4	4	20	2	8	1	2	2	1	4	1	2	2	2
HOM001963	4	4	3	4	2	5	1	0	4	1	3	5	3	3	2	2	6	12	16
HOM001964	4	3	3	2	3	8	4	3	4	3	3	4	2	3	2	2	3	3	5
HOM001965	5	4	2	1	2	5	1	4	3	1	3	3	2	4	3	2	3	2	1
HOM001966	4	4	2	3	6	5	5	2	4	3	2	6	5	2	3	3	3	6	8
HOM001967	6	3	4	2	3	6	1	3	2	2	3	5	2	4	2	3	6	6	5
HOM001968	2	2	2	3	2	4	2	9	4	2	2	3	2	2	3	2	3	2	2
HOM001969	2	2	2	2	3	3	2	6	3	0	1	3	6	1	3	1	1	3	3
HOM001972	3	4	0	3	3	9	4	4	4	4	1	5	6	1	4	4	1	2	1
HOM001973	8	5	3	2	2	4	1	3	7	1	3	2	2	3	4	2	4	3	5
HOM001974	4	4	4	2	1	8	2	5	4	1	4	4	1	4	2	3	6	4	4
HOM001975	3	3	2	1	3	4	1	11	2	3	3	3	2	3	3	2	2	2	2
HOM001976	4	3	4	2	3	6	1	4	3	1	4	4	2	3	2	2	4	3	4
HOM001977	7	7	0	3	2	13	2	6	6	2	0	5	3	0	3	4	0	9	9
HOM001978	4	4	2	2	4	4	4	7	4	3	2	3	3	2	2	1	2	3	3
HOM001979	2	2	2	2	2	4	3	14	3	3	2	2	2	2	2	2	4	4	4
HOM001980	3	2	1	3	1	6	2	4	2	3	2	4	1	6	2	3	4	1	1
HOM001981	4	4	2	1	2	4	3	5	3	4	2	4	3	3	3	2	5	10	15
HOM001982	1	1	2	2	3	4	2	4	3	3	2	3	2	2	3	2	3	1	0
HOM001983	2	2	4	5	1	3	3	6	3	3	3	3	2	1	2	2	3	2	2
HOM001984	2	2	3	3	2	4	2	7	3	3	3	3	1	5	2	2	4	2	2
HOM001985	2	2	3	2	2	7	2	4	4	3	3	3	2	4	2	5	3	2	2
HOM001986	3	3	2	1	2	4	2	5	3	2	2	5	2	2	2	3	6	3	2
HOM001987	5	2	2	1	3	7	4	4	5	4	2	5	3	3	2	2	3	2	3
HOM001988	2	1	6	1	2	4	3	8	2	2	3	4	1	5	2	1	6	2	2
HOM001989	3	3	2	1	2	6	2	3	5	2	4	5	3	4	2	1	5	3	3
HOM001990	2	2	2	4	3	4	0	2	2	4	2	2	6	1	2	3	10	5	8
HOM001991	3	3	3	2	3	4	0	16	3	2	1	3	3	1	3	2	0	2	1
HOM001992	3	3	1	3	2	4	1	4	5	2	3	4	3	2	2	3	2	4	5
HOM001993	2	2	3	3	2	4	0	4	2	4	2	3	2	3	3	4	2	3	3
HOM001994	2	2	3	2	2	4	5	3	3	0	3	3	4	3	2	2	2	3	3
HOM001995	2	2	2	3	3	4	1	2	3	3	3	5	2	5	2	2	8	3	2
HOM001996	0	2	2	2	1	4	4	3	2	3	3	5	2	3	4	2	3	6	4
HOM001997	4	3	3	2	2	6	5	4	3	4	2	5	2	2	3	4	2	5	6
HOM001998	2	2	2	2	2	8	2	5	3	3	2	6	2	2	2	2	6	2	2
HOM001999	1	1	3	1	1	4	7	8	2	2	3	1	1	2	2	3	3	1	1
HOM002000	3	3	2	1	2	4	2	7	3	2	3	4	4	2	3	2	2	3	1
HOM002001	3	4	2	2	1	5	3	9	2	0	2	3	2	2	2	2	7	4	4
HOM002002	1	3	4	4	2	6	5	4	3	2	3	4	2	3	3	3	6	4	5
HOM002003	2	2	3	2	3	3	2	6	3	2	5	4	2	7	3	2	4	1	1
HOM002004	2	2	2	3	3	4	2	10	4	2	3	3	3	2	3	3	3	2	1
HOM002005	2	2	2	3	2	7	1	6	2	3	3	4	2	5	2	2	5	3	2
HOM002006	3	2	3	1	3	5	2	8	3	2	2	3	2	2	2	4	3	1	1
HOM002007	1	2	2	2	2	4	3	8	4	1	2	6	2	1	2	2	4	2	1
HOM002008	0	1	2	8	2	2	6	4	2	4	2	1	1	4	1	2	3	5	11
HOM002009	2	2	1	4	1	4	3	4	3	1	2	2	5	3	3	4	4	6	6
HOM002010	4	1	1	7	1	6	6	0	2	1	1	8	2	6	1	3	3	10	11
HOM002011	2	2	3	2	2	7	2	3	4	3	4	3	2	4	2	3	5	1	1
HOM002012	2	2	2	2	3	4	1	9	2	0	2	5	2	2	2	3	2	2	2
HOM002014	3	4	2	2	3	6	2	2	4	1	2	5	2	2	2	4	4	2	2
HOM002015	2	4	2	4	3	6	2	6	5	4	2	5	3	2	2	3	3	6	6
HOM002016	1	1	2	3	3	3	3	6	1	6	3	6	2	1	4	4	2	1	1
HOM002017	3	3	2	2	2	2	0	4	3	1	2	4	2	1	2	2	7	3	2
HOM002018	4	4	2	2	2	8	2	5	4	4	2	4	2	3	2	2	4	7	5
HOM002019	2	2	2	2	2	4	1	4	2	4	2	4	2	4	4	2	2	4	3
HOM002020	1	1	5	1	1	4	0	2	4	2	6	5	2	5	3	2	10	1	1
HOM002021	2	1	2	3	8	2	3	10	2	5	2	1	3	1	1	4	3	1	1
HOM002022	2	2	3	2	1	7	2	8	4	4	3	4	2	4	2	2	6	3	2
HOM002023	2	2	2	2	2	3	2	4	3	1	1	2	1	2	2	2	5	3	2
HOM002024	5	2	2	2	3	4	2	5	3	2	3	4	2	2	2	7	4	2	3
HOM002025	2	2	2	2	3	5	1	7	4	3	3	5	2	1	2	2	4	3	3
HOM002026	1	1	4	0	1	1	1	0	0	0	16	2	0	4	1	1	1	1	1
HOM002028	2	2	2	1	2	4	1	6	4	1	3	3	2	2	2	2	7	2	3
HOM002029	2	2	1	1	1	4	5	19	2	7	1	2	2	1	2	1	2	1	1
HOM002030	3	3	3	2	2	7	1	4	2	1	3	3	1	2	2	3	7	2	2
HOM002031	8	9	1	3	5	8	1	8	3	1	1	4	3	1	3	0	1	2	4
HOM002032	2	2	3	6	1	4	4	5	4	2	3	4	2	4	3	1	4	2	2
HOM002033	1	1	2	2	4	4	3	5	4	4	2	5	2	3	2	4	2	2	2
HOM002034	1	1	1	1	1	2	0	33	2	1	1	1	1	3	1	1	1	1	1
HOM002035	2	2	2	2	2	6	4	5	2	5	0	8	2	2	3	3	1	2	2
HOM002037	3	3	1	3	2	6	5	8	2	1	2	4	7	3	2	3	2	3	2
HOM002038	2	3	3	3	2	6	4	4	3	1	2	4	2	3	2	3	6	4	6
HOM002039	3	1	2	2	1	7	5	3	4	2	2	6	2	3	2	2	2	7	7
HOM002040	3	3	3	2	3	6	3	6	3	1	3	4	1	4	2	5	5	6	12
HOM002041	3	3	2	3	3	4	3	6	4	1	3	4	2	3	3	2	4	3	3
HOM002042	2	3	1	2	2	8	3	9	3	2	2	4	2	1	2	2	2	3	4
HOM002043	2	2	3	2	1	6	5	8	2	1	4	3	2	3	2	2	4	3	4
HOM002045	2	2	2	3	2	4	4	5	3	0	2	4	2	2	3	2	3	3	3
HOM002046	5	4	3	1	1	3	3	4	3	1	4	2	1	5	1	2	7	2	1
HOM002047	3	2	3	2	1	4	5	4	2	3	2	3	2	4	2	3	5	2	2
HOM002048	4	4	0	4	5	4	4	6	4	3	0	6	4	0	7	4	0	2	6
HOM002049	8	2	1	2	2	4	4	10	2	5	2	1	2	1	1	0	2	1	1
HOM002050	2	2	3	2	1	4	2	3	4	2	5	4	2	3	2	1	5	1	0
HOM002051	6	2	2	2	3	4	3	4	2	2	2	2	2	2	2	2	2	2	2
HOM002052	2	2	6	1	2	5	2	9	2	8	1	3	2	3	2	2	2	1	1
HOM002053	3	3	2	1	5	7	5	3	3	2	2	2	2	1	4	1	1	3	2
HOM002054	4	4	2	1	2	3	1	3	3	1	3	3	2	3	2	2	2	3	4
HOM002055	3	3	3	2	3	6	3	3	3	4	4	5	3	3	3	3	3	3	3
HOM002057	5	4	2	2	2	10	2	6	4	2	3	4	2	3	2	0	5	4	4
HOM002058	3	2	3	1	1	4	3	8	1	1	2	4	0	2	1	1	2	1	4
HOM002059	5	4	4	1	2	4	1	4	3	1	4	3	2	3	2	2	7	5	6
HOM002060	0	1	3	1	2	7	4	7	2	0	6	2	2	3	2	3	6	1	1
HOM002061	3	3	2	2	2	4	3	8	3	2	2	5	2	2	3	2	3	2	2
HOM002062	3	4	2	2	2	2	5	2	3	0	2	3	5	3	2	15	2	3	1
HOM002063	2	2	2	2	2	6	5	14	3	1	2	5	2	2	2	2	2	2	2
HOM002064	3	1	2	2	1	4	1	3	2	1	3	3	2	2	2	2	4	1	1
HOM002065	2	2	3	2	4	6	3	9	3	2	2	6	3	2	3	2	4	2	1
HOM002066	2	2	3	3	2	6	4	4	2	3	4	4	2	3	2	2	3	3	3
HOM002067	3	2	3	2	3	3	3	7	3	2	2	3	2	3	2	2	3	2	3
HOM002068	4	2	2	1	2	7	1	9	2	2	2	4	2	2	2	2	4	2	2
HOM002069	3	2	1	1	1	4	3	5	2	1	2	4	1	3	1	2	3	3	2
HOM002070	2	2	2	2	2	4	1	11	3	3	2	3	2	2	2	4	4	2	1
HOM002071	2	2	2	2	2	4	1	10	2	1	2	4	3	7	2	2	3	4	7
HOM002072	3	2	2	0	2	5	3	7	4	3	2	4	2	2	2	2	4	2	2
HOM002073	13	2	2	1	3	2	1	12	2	2	2	1	1	1	2	1	2	2	2
HOM002074	2	2	2	3	2	8	2	6	4	2	6	3	2	2	2	4	2	4	4
HOM002075	2	2	2	1	1	2	5	10	2	1	3	2	1	1	2	1	7	2	1
HOM002076	4	3	2	2	3	4	2	8	4	3	2	4	5	3	3	1	3	3	3
HOM002077	3	2	2	4	2	3	3	4	1	2	2	1	2	2	2	2	2	4	4
HOM002078	2	2	2	4	2	2	3	7	2	3	2	5	2	2	2	2	2	4	8
HOM002079	2	2	1	2	3	6	4	8	4	3	1	3	2	2	2	2	3	2	1
HOM002080	2	2	3	2	3	2	2	5	3	3	3	4	2	3	2	2	5	2	1
HOM002081	4	3	2	2	3	4	4	2	3	1	3	2	2	2	2	2	4	3	5
HOM002082	3	2	4	1	3	8	0	2	0	5	4	3	3	4	3	2	4	2	2
HOM002083	5	3	2	1	1	4	5	5	2	2	2	4	1	2	2	1	6	1	0
HOM002084	7	5	0	4	3	10	1	6	7	5	0	5	2	0	2	3	0	5	5
HOM002085	8	9	1	1	1	3	1	5	2	2	2	2	1	5	1	1	1	1	2
HOM002086	6	2	2	7	4	1	3	7	2	1	1	2	1	3	6	1	1	7	18
HOM002087	2	2	2	2	4	4	2	10	2	5	2	3	2	0	1	2	2	1	0
HOM002088	4	4	2	2	3	2	2	16	2	2	2	6	2	2	2	1	2	5	7
HOM002089	4	5	4	2	2	10	3	1	4	1	3	4	2	3	2	2	4	7	8
HOM002090	3	2	2	4	2	2	1	3	4	3	2	3	2	3	3	4	3	1	1
HOM002091	2	2	3	3	2	4	2	4	3	1	3	5	1	7	2	2	4	2	1
HOM002093	3	2	1	5	3	7	3	5	5	4	1	6	4	1	3	3	1	4	4
HOM002094	3	4	1	2	1	6	3	6	3	3	2	3	2	3	2	3	3	3	3
HOM002095	3	3	2	2	2	4	1	7	4	5	2	4	2	2	2	1	3	1	0
HOM002096	2	2	3	2	2	3	2	9	3	2	3	3	2	2	2	2	5	2	2
HOM002097	2	2	3	2	3	4	3	2	4	4	3	5	3	3	3	2	6	6	6
HOM002098	2	2	2	4	5	5	2	3	2	3	2	2	2	2	2	4	2	2	2
HOM002099	3	3	0	1	4	3	2	10	2	2	0	15	1	0	5	9	0	2	2
HOM002100	2	2	1	2	2	5	3	4	3	2	2	13	2	1	2	2	3	3	3
HOM002101	2	2	6	2	2	5	2	2	3	2	5	3	2	5	2	1	9	1	1
HOM002102	2	5	2	3	3	9	3	5	4	1	2	5	3	0	3	3	3	8	6
HOM002103	7	6	1	3	5	6	1	7	5	3	1	3	3	1	4	2	1	4	9
HOM002104	3	3	2	2	2	4	1	4	3	1	2	2	2	2	2	3	3	3	2
HOM002105	2	2	6	1	6	2	0	2	2	1	6	3	1	5	1	1	2	3	3
HOM002106	3	4	3	2	2	5	2	3	6	3	3	4	2	3	2	2	6	4	3
HOM002107	1	2	2	4	2	5	1	7	2	3	2	4	6	2	2	2	2	2	2
HOM002108	3	2	2	3	2	4	2	6	2	2	2	2	2	1	3	5	3	4	4
HOM002109	1	3	1	2	1	6	3	2	4	0	2	4	3	1	3	4	2	4	3
HOM002111	1	1	1	1	2	1	3	20	1	0	2	2	5	1	1	3	1	1	1
HOM002112	1	2	3	2	3	4	2	5	3	0	3	3	1	2	2	1	5	3	3
HOM002113	2	2	2	2	2	4	5	7	2	3	2	3	2	2	2	2	2	2	2
HOM002114	3	2	2	2	3	6	2	4	5	3	2	4	2	4	2	2	3	3	3
HOM002115	3	2	3	1	4	2	3	6	1	5	3	5	3	1	3	2	4	3	2
HOM002116	2	2	3	2	2	6	2	5	2	1	3	5	3	3	1	2	6	2	2
HOM002117	2	3	2	3	3	5	5	3	3	2	2	3	3	1	2	4	3	5	6
HOM002118	1	1	2	2	4	3	1	7	1	4	2	2	2	5	1	2	6	1	1
HOM002119	4	3	5	2	2	6	1	5	2	1	4	4	2	4	2	3	4	2	1
HOM002120	3	2	2	2	2	5	0	7	3	2	3	4	2	2	2	2	2	2	2
HOM002121	1	1	2	2	18	2	2	1	1	0	1	1	16	1	1	1	1	1	1
HOM002122	7	4	2	2	2	9	1	5	3	3	3	2	2	3	2	2	3	4	4
HOM002123	3	3	2	3	2	3	2	5	4	7	1	5	3	2	2	4	3	4	4
HOM002124	2	2	2	3	2	6	4	5	4	3	2	6	2	1	3	3	5	2	1
HOM002125	1	1	3	1	1	4	0	4	2	3	3	2	7	3	1	1	4	4	0
HOM002126	2	2	1	1	3	2	3	3	3	5	1	4	3	1	2	2	1	2	1
HOM002127	2	3	2	2	2	3	4	4	3	3	4	4	1	3	2	1	3	3	2
HOM002128	18	15	1	1	1	2	0	3	1	0	2	1	1	1	1	1	0	3	6
HOM002129	2	2	3	1	2	5	4	8	3	1	2	3	2	4	2	3	3	5	7
HOM002130	27	20	0	0	2	0	0	3	3	0	0	0	3	0	1	0	0	10	11
HOM002131	3	4	3	2	2	4	2	4	3	1	4	2	2	4	2	3	6	2	0
HOM002132	1	2	2	3	3	7	3	9	4	2	2	5	2	2	2	2	2	3	3
HOM002133	4	3	2	2	3	7	2	3	2	0	2	4	2	2	2	2	5	4	3
HOM002134	2	2	3	2	2	4	1	5	3	2	2	2	2	2	2	2	5	2	2
HOM002135	4	4	2	3	2	10	4	5	4	2	1	5	1	2	3	3	2	2	2
HOM002136	1	1	2	1	3	4	3	11	2	4	5	4	1	2	1	1	2	2	2
HOM002137	3	4	3	2	2	4	2	4	4	2	3	6	4	4	4	2	3	3	5
HOM002138	4	2	1	2	4	4	2	3	4	2	2	3	2	3	1	3	3	3	4
HOM002139	4	3	4	4	2	5	1	4	2	3	2	3	2	2	1	1	4	3	3
HOM002140	4	5	2	2	2	6	2	2	2	1	3	6	2	5	2	2	2	5	2
HOM002141	2	2	2	3	2	5	1	11	3	5	2	4	4	2	2	2	1	1	1
HOM002142	2	2	1	1	2	7	2	6	4	16	1	4	1	2	2	3	2	2	1
HOM002143	4	2	2	3	2	4	2	2	4	5	2	4	3	2	1	2	2	2	2
HOM002145	1	1	1	2	4	10	8	7	4	5	2	3	2	0	3	3	3	2	0
HOM002146	4	3	3	2	3	3	5	1	1	0	4	2	1	3	2	2	4	4	4
HOM002147	3	3	2	2	3	7	2	3	4	6	2	4	2	2	2	2	2	2	2
HOM002148	2	2	4	2	2	4	2	10	4	2	2	3	2	2	2	2	3	2	2
HOM002149	2	2	3	3	1	5	2	3	3	1	3	3	3	3	3	3	5	1	4
HOM002150	3	2	2	3	2	4	1	5	4	3	2	5	3	1	4	2	3	2	1
HOM002151	3	2	2	2	4	5	1	12	3	1	3	3	1	3	2	2	5	4	6
HOM002153	6	4	2	2	2	3	1	5	2	1	2	4	1	2	3	3	4	2	2
HOM002154	4	1	2	1	1	6	3	3	1	1	1	2	5	2	1	6	2	1	1
HOM002155	3	3	2	1	2	4	4	5	0	3	2	5	2	2	1	1	6	2	2
HOM002156	1	1	3	2	4	4	2	4	2	3	5	3	2	5	2	2	3	1	1
HOM002157	2	2	2	4	3	7	3	7	2	5	2	4	1	2	1	2	2	1	1
HOM002158	4	3	2	2	2	4	2	7	2	2	3	5	2	2	2	2	4	4	10
HOM002159	2	2	3	2	4	5	1	6	3	1	2	5	2	3	2	2	3	2	1
HOM002160	2	2	0	3	3	10	2	8	3	4	1	7	3	2	4	1	2	2	2
HOM002161	4	4	3	3	2	9	2	4	3	2	2	5	2	0	2	4	4	3	3
HOM002162	2	2	2	2	1	4	5	5	2	2	3	2	1	2	1	1	6	2	4
HOM002163	1	1	2	1	3	3	4	5	2	2	2	2	1	3	1	1	2	1	1
HOM002164	2	2	2	3	2	3	3	3	2	1	2	2	5	2	1	2	5	3	4
HOM002165	2	2	5	1	2	2	0	2	2	1	5	2	1	4	2	1	5	2	1
HOM002166	2	1	1	2	2	5	1	7	6	3	2	11	3	3	3	1	2	1	1
HOM002167	2	2	2	1	1	11	2	3	2	10	2	3	1	2	1	1	8	1	1
HOM002168	1	1	2	2	2	5	3	9	4	2	3	4	2	1	2	3	2	1	0
HOM002169	2	2	2	3	2	4	2	6	2	0	2	4	2	2	2	3	3	4	8
HOM002170	2	3	2	2	6	2	3	4	2	3	3	2	1	5	1	1	3	2	0
HOM002171	3	3	4	2	2	6	3	4	3	2	3	4	2	2	2	2	3	1	1
HOM002172	2	3	3	4	6	3	3	5	2	3	3	1	2	2	2	2	1	4	9
HOM002173	2	2	2	3	2	3	1	6	4	3	2	3	2	2	2	2	4	1	1
HOM002175	3	3	3	3	4	6	2	4	4	0	4	2	2	3	3	2	5	3	3
HOM002176	3	3	1	2	3	6	4	9	2	1	2	3	2	2	2	2	3	3	2
HOM002177	2	2	2	2	2	4	2	6	2	4	2	3	1	3	2	4	4	3	1
HOM002179	1	1	1	5	1	2	3	8	3	1	1	4	2	1	4	1	2	2	2
HOM002180	4	3	2	2	2	7	4	6	4	4	3	3	2	2	2	2	2	3	5
HOM002181	6	6	0	2	3	9	1	7	5	3	0	5	3	0	5	3	0	1	1
HOM002182	5	4	2	1	3	2	3	2	2	2	2	2	4	3	2	8	2	3	4
HOM002183	2	2	5	2	5	2	1	4	2	0	5	2	1	4	1	1	6	4	4
HOM002184	6	6	2	2	2	4	2	5	2	5	2	3	3	2	2	2	2	3	4
HOM002185	1	2	1	1	2	5	2	12	8	1	2	7	2	0	2	5	3	2	2
HOM002186	3	3	2	2	1	3	2	6	3	2	4	4	2	2	2	2	3	3	3
HOM002187	2	2	3	2	4	6	1	3	3	3	3	3	2	2	2	1	3	2	2
HOM002188	3	3	1	3	2	2	1	6	1	3	3	3	1	4	1	7	1	1	3
HOM002189	3	3	1	2	1	6	3	5	2	4	1	4	3	1	4	1	2	3	4
HOM002190	3	3	2	1	2	4	2	5	4	0	2	2	2	2	2	2	5	2	5
HOM002191	2	3	2	2	1	6	5	5	2	2	2	4	2	3	2	2	3	2	2
HOM002192	3	3	3	2	2	5	2	2	4	3	3	1	2	4	2	1	7	2	2
HOM002193	1	1	1	3	1	5	2	5	2	4	1	1	2	1	1	19	1	2	3
HOM002194	2	2	3	3	2	4	3	4	3	1	2	7	2	2	3	2	3	2	2
HOM002196	2	3	2	2	2	4	1	4	2	2	3	4	2	2	2	2	2	2	2
HOM002197	3	3	3	2	2	4	2	5	3	1	3	4	2	3	2	2	3	6	7
HOM002198	3	2	4	2	4	4	0	3	4	1	3	3	4	1	3	3	2	2	1
HOM002200	6	3	1	1	1	2	3	8	2	5	1	3	1	3	3	1	1	4	3
HOM002201	2	2	1	5	2	5	5	5	4	2	1	3	2	1	2	3	1	5	4
HOM002202	3	3	2	2	2	6	4	2	3	4	3	3	2	2	4	4	1	2	3
HOM002203	4	4	2	2	1	4	3	3	2	0	2	3	2	3	2	2	4	1	1
HOM002204	1	1	1	3	2	4	0	12	3	3	2	5	4	2	2	2	1	3	4
HOM002205	2	2	1	2	2	5	4	5	3	8	1	4	2	1	3	3	1	2	2
HOM002206	2	2	2	2	2	3	2	3	3	8	2	4	2	2	3	2	3	2	2
HOM002207	3	3	4	1	2	4	1	3	3	3	4	2	2	5	2	2	7	1	1
HOM002208	2	2	2	2	4	4	2	4	4	6	3	4	2	4	2	1	5	2	2
HOM002209	1	1	3	2	2	4	4	7	2	3	3	3	2	1	2	2	4	2	2
HOM002210	3	2	2	1	2	5	3	2	3	1	2	4	3	2	4	2	8	3	3
[truncated: 4,571 more rows]

## Sheet: a.thaliana.increase
	AL	AT	BD	CP	FV	GM	LJ	MD	ME	MT	OS	PT	RC	SB	SM	TC	VV	ZM	At_reclustering	At_oases			AL	AT	BD	CP	FV	GM	LJ	MD	ME	MT	OS	PT	RC	SB	SM	TC	VV	ZM
HOM000011	97	90	85	71	135	221	131	263	130	147	94	157	107	102	53	116	142	87	54	51		At_reclustering	0.908897	0.933869	0.773518	0.87565	0.804433	0.902543	0.822557	0.810301	0.902981	0.744457	0.657763	0.889492	0.869268	0.70199	0.696708	0.851546	0.832937	0.800357
HOM000014	106	98	90	62	68	185	79	172	110	76	97	115	64	89	93	64	64	130	77	73		At_oases	0.90243	0.929167	0.765001	0.872552	0.800543	0.899478	0.818276	0.807245	0.898103	0.733578	0.648244	0.884657	0.863983	0.695828	0.699084	0.846707	0.822695	0.795948
HOM000019	62	73	80	59	59	145	91	152	76	70	84	96	60	81	52	48	58	133	76	74
HOM000024	25	20	185	10	45	70	8	87	45	49	297	52	53	207	0	52	58	66	17	12
HOM000032	90	80	57	50	58	135	62	144	94	55	60	91	51	61	13	57	60	79	68	64
HOM000036	61	57	56	50	66	112	24	14	62	70	53	77	59	52	38	48	60	71	76	63
HOM000037	68	58	68	40	62	125	55	63	58	61	102	68	50	96	27	54	44	91	53	49
HOM000039	64	60	52	93	59	127	53	125	82	62	55	92	45	55	13	58	51	81	38	34
HOM000055	52	39	62	33	66	79	37	106	52	58	56	67	38	60	14	54	32	56	18	16
HOM000057	61	55	41	38	42	84	40	113	54	34	44	71	36	37	15	39	44	58	53	43
HOM000059	46	46	51	32	41	119	60	17	57	66	56	51	41	59	14	58	47	46	46	39
HOM000061	46	41	41	31	30	75	41	79	54	26	47	59	33	47	38	40	39	58	33	29
HOM000064	62	50	32	30	35	63	42	123	66	36	41	46	32	42	20	31	44	33	38	30
HOM000068	41	38	42	29	42	71	25	107	54	25	35	55	31	30	16	37	38	60	34	29
HOM000075	45	46	37	34	28	91	34	60	56	31	43	59	34	41	15	31	34	60	49	43
HOM000077	30	28	40	27	44	63	30	62	44	33	51	70	40	61	24	46	54	41	16	15
HOM000079	39	40	34	39	92	59	22	79	46	36	45	54	41	31	6	53	18	42	31	29
HOM000082	36	28	29	30	31	63	42	97	36	37	36	50	28	38	7	43	71	43	31	27
HOM000083	29	19	32	13	70	46	57	96	22	88	32	33	17	35	10	24	26	40	23	16
HOM000085	41	34	31	27	37	81	36	74	40	34	35	54	35	40	12	31	31	37	23	12
HOM000086	21	25	46	17	20	42	31	59	42	33	64	38	23	57	45	33	30	52	17	15
HOM000094	33	32	32	24	28	62	30	70	40	31	27	48	24	26	10	26	36	44	33	26
HOM000096	21	21	36	24	60	64	34	59	32	28	34	64	32	36	15	41	62	29	20	17
HOM000099	35	36	27	21	24	79	24	57	44	26	30	44	22	29	26	24	22	46	30	29
HOM000102	22	27	37	18	20	54	19	54	31	28	38	40	19	45	1	20	21	53	33	27
HOM000103	26	28	23	24	26	87	29	40	34	36	38	37	21	44	4	19	23	44	19	16
HOM000105	23	25	26	21	20	60	40	50	32	40	31	43	19	27	14	27	30	43	25	17
HOM000107	28	22	31	19	33	59	22	56	34	21	36	42	26	44	18	30	22	37	19	18
HOM000108	27	25	24	27	24	56	33	42	34	21	25	33	22	22	16	22	23	31	38	36
HOM000110	33	29	24	23	21	66	42	61	30	20	27	40	20	28	10	23	24	38	40	35
HOM000111	30	22	20	25	21	45	19	53	27	15	20	34	21	22	10	18	18	33	21	18
HOM000113	32	25	18	16	21	51	23	53	34	20	23	35	17	26	10	22	25	27	21	18
HOM000120	20	15	29	26	19	38	25	56	28	18	29	41	20	35	10	22	24	38	21	18
HOM000122	30	27	29	15	26	34	21	56	29	30	33	35	11	33	6	8	17	25	20	9
HOM000125	21	22	21	17	21	38	16	55	19	17	15	24	16	16	5	16	18	29	17	12
HOM000128	20	19	15	17	14	36	20	60	23	16	15	35	18	14	59	19	24	39	17	9
HOM000131	33	28	26	21	19	60	17	45	36	20	31	32	18	25	4	21	23	39	22	21
HOM000134	22	21	28	15	19	32	19	60	29	31	29	36	19	32	5	22	20	30	26	25
HOM000146	24	23	21	17	19	54	21	35	32	19	22	39	20	25	8	21	22	27	20	18
HOM000147	21	19	18	16	16	45	24	45	24	25	19	36	17	20	3	20	14	24	16	12
HOM000148	6	12	9	7	32	11	8	57	5	46	17	26	11	153	0	7	9	26	11	10
HOM000150	18	18	21	19	17	61	21	45	32	22	21	30	19	20	8	19	18	27	16	15
HOM000152	15	17	18	15	17	47	19	40	22	11	19	31	16	21	10	16	20	33	19	15
HOM000154	23	20	26	26	10	26	11	24	29	8	33	31	34	36	4	25	25	29	11	10
HOM000156	19	14	13	17	14	26	27	38	20	17	14	28	13	16	12	18	24	16	19	18
HOM000159	14	13	24	14	16	50	22	29	21	26	31	33	17	29	1	15	27	27	15	10
HOM000164	23	25	19	16	16	45	14	32	28	22	20	28	16	23	5	17	14	29	24	23
HOM000172	26	22	19	12	16	32	21	36	19	14	20	24	15	18	7	21	20	23	16	15
HOM000174	14	14	20	19	15	42	20	31	20	15	20	32	17	19	7	20	19	27	19	15
HOM000175	22	13	13	11	12	26	15	41	20	31	15	18	12	23	5	13	15	29	13	9
HOM000176	24	21	18	19	13	39	20	28	23	24	14	24	20	20	8	20	15	20	18	16
HOM000179	18	18	15	12	14	37	27	50	19	9	18	21	12	13	5	14	14	35	15	14
HOM000183	19	14	14	13	14	28	16	30	15	29	19	22	15	13	10	13	14	20	13	12
HOM000184	6	6	21	4	6	10	6	18	8	4	12	10	5	40	4	7	4	197	7	5
HOM000185	33	20	31	9	10	18	16	25	15	20	26	19	12	48	6	14	19	18	15	14
HOM000187	21	19	16	11	17	32	15	44	21	25	15	20	12	13	3	18	10	33	16	11
HOM000188	23	16	20	12	11	37	14	43	21	16	23	26	12	21	3	14	16	31	18	17
HOM000191	44	35	10	15	19	25	15	32	17	38	12	25	14	11	4	10	11	18	22	21
HOM000192	20	21	18	13	18	25	8	19	19	4	24	20	28	25	4	21	30	13	16	10
HOM000197	14	13	17	12	15	32	19	34	21	14	20	23	12	15	1	16	11	26	17	11
HOM000202	12	10	14	12	9	22	31	38	17	16	15	20	16	9	10	10	15	17	10	9
HOM000205	15	23	22	8	10	36	16	18	18	21	32	15	14	24	0	22	6	29	17	14
HOM000208	13	11	17	12	14	28	8	40	19	16	16	20	12	16	3	13	11	20	10	9
HOM000211	22	9	24	8	12	16	29	23	12	35	30	12	11	17	9	10	12	27	6	1
HOM000215	12	12	14	10	10	24	31	15	20	29	26	16	20	21	5	17	13	13	10	6
HOM000217	10	8	11	8	8	23	24	70	15	12	11	30	14	13	12	9	10	14	13	12
HOM000220	16	13	16	11	20	26	20	26	16	19	17	24	13	13	6	14	19	18	18	17
HOM000222	9	9	8	15	20	19	8	58	20	19	12	24	10	13	9	13	36	8	9	8
HOM000225	16	13	16	12	11	39	14	36	18	14	13	21	14	14	7	15	16	19	8	7
HOM000228	19	17	12	14	10	39	15	29	22	14	14	27	15	10	6	15	17	14	21	18
HOM000229	14	13	14	10	9	32	23	28	15	13	24	18	10	13	6	12	19	20	13	10
HOM000231	22	13	13	14	10	28	18	27	15	14	14	20	10	12	7	12	17	19	23	22
HOM000239	15	15	17	8	12	18	8	16	11	26	23	17	8	24	6	17	31	22	18	14
HOM000241	12	13	9	22	17	34	13	32	21	32	20	17	19	10	0	24	7	8	7	6
HOM000245	17	20	13	10	21	10	12	36	9	31	29	12	9	11	2	13	6	18	6	5
HOM000246	26	16	14	10	11	21	19	25	12	18	17	19	14	17	7	12	10	17	14	13
HOM000248	13	9	12	7	10	20	13	33	14	25	11	20	13	11	3	11	16	20	5	4
HOM000249	14	14	18	10	8	34	14	39	17	12	18	16	11	20	3	10	10	23	11	5
HOM000252	19	11	11	10	8	23	17	38	13	8	12	18	8	13	2	11	12	14	10	7
HOM000253	17	14	9	13	9	25	13	42	18	6	11	20	12	10	4	12	14	13	13	11
HOM000260	14	13	16	7	13	29	15	32	11	35	23	26	8	17	0	15	6	10	8	6
HOM000261	12	13	11	10	12	23	7	25	16	8	13	19	9	14	0	11	14	23	12	8
HOM000265	6	5	11	11	10	26	15	29	24	44	15	20	25	10	2	12	12	9	5	4
HOM000267	10	14	10	10	16	18	19	57	15	10	12	24	15	12	1	13	15	11	10	9
HOM000268	20	16	15	16	9	23	10	19	13	30	16	20	10	11	5	11	12	15	6	3
HOM000269	15	13	14	7	12	21	10	19	10	14	13	15	9	14	7	8	7	20	9	6
HOM000273	11	11	13	11	13	23	12	39	15	12	17	24	11	15	8	13	15	13	8	5
HOM000275	13	11	19	10	10	34	10	1	16	18	17	20	11	17	6	10	11	27	13	11
HOM000276	7	7	5	6	4	21	12	13	12	127	6	17	6	7	3	6	14	7	13	9
HOM000279	14	13	14	9	8	25	13	33	18	10	15	17	10	16	3	12	8	24	11	10
HOM000289	13	13	9	9	8	22	9	17	11	19	12	15	9	12	5	9	9	9	9	8
HOM000292	13	15	13	13	12	18	7	18	22	9	13	19	14	12	7	15	15	16	12	7
HOM000293	16	12	10	13	16	26	7	50	16	12	10	19	11	9	3	16	9	17	14	11
HOM000294	12	9	8	12	10	25	16	33	15	9	12	16	9	9	7	13	15	14	9	6
HOM000295	13	11	12	12	12	25	18	24	19	14	11	13	11	11	4	8	9	15	12	9
HOM000298	8	8	12	10	12	33	13	32	17	8	15	23	8	10	5	9	12	16	10	7
HOM000308	20	17	17	8	10	22	7	25	20	8	10	14	13	15	4	12	7	22	29	27
HOM000309	16	9	21	11	14	15	16	24	9	9	12	10	9	12	6	7	8	12	9	8
HOM000310	19	15	12	7	11	23	9	20	12	11	17	16	8	17	1	10	7	22	12	10
HOM000312	12	11	6	11	15	30	11	34	17	16	10	15	13	8	5	15	12	8	11	10
HOM000316	12	11	11	9	9	22	10	43	9	16	13	14	7	9	23	11	7	11	10	9
HOM000322	24	21	13	17	11	21	17	13	13	7	12	13	10	14	6	18	7	16	11	9
HOM000328	15	13	9	11	7	24	11	28	13	9	9	13	7	12	8	13	8	13	16	12
HOM000329	17	14	12	10	11	21	9	18	17	6	14	19	11	13	8	12	18	15	17	14
HOM000341	16	15	7	8	8	18	12	45	16	9	8	13	8	6	5	8	9	21	11	8
HOM000342	10	10	9	8	30	20	9	25	14	10	12	18	14	8	8	10	12	13	10	9
HOM000346	10	8	8	6	11	23	15	30	20	14	15	22	10	7	7	10	21	7	10	8
HOM000350	9	8	11	8	7	14	5	33	9	6	10	12	9	9	38	7	8	12	10	8
HOM000357	14	13	14	8	10	29	9	20	12	15	13	16	9	15	3	9	13	15	13	12
HOM000362	17	9	6	10	9	18	17	27	14	7	6	19	11	3	10	12	13	8	14	8
HOM000364	9	8	13	6	11	9	10	13	10	9	11	14	6	11	1	8	7	16	5	4
HOM000365	9	9	8	10	10	16	18	16	8	18	8	14	9	8	12	9	9	9	21	19
HOM000366	11	13	11	8	9	23	5	28	15	9	15	11	9	13	1	13	10	22	13	10
HOM000368	9	8	10	8	14	23	8	20	17	6	12	23	12	12	6	10	10	12	7	5
HOM000369	7	6	11	5	10	12	10	29	10	6	8	10	5	42	3	5	12	17	7	4
HOM000370	10	11	10	13	12	21	9	34	11	14	9	16	9	9	5	9	14	13	15	12
HOM000371	18	18	3	10	12	25	10	27	23	10	9	24	14	7	0	17	5	5	16	14
HOM000372	13	11	11	7	11	25	7	35	13	9	15	18	8	13	1	9	6	17	10	9
HOM000373	9	10	9	9	9	15	7	28	12	23	8	17	7	11	6	9	10	12	10	8
HOM000377	9	9	11	9	8	25	5	38	13	9	11	20	9	12	1	7	15	18	10	6
HOM000380	9	13	9	8	6	21	8	37	11	12	9	13	8	9	2	10	9	15	14	9
HOM000382	10	5	8	5	7	10	11	19	5	4	6	9	13	5	2	8	10	7	5	2
HOM000383	11	9	7	14	10	16	17	36	12	13	10	15	10	9	5	10	15	6	10	6
HOM000390	9	8	9	7	8	18	9	25	13	7	9	12	9	4	2	8	11	15	10	9
HOM000392	13	13	10	8	9	20	8	26	16	8	12	16	7	10	1	15	9	14	8	7
HOM000393	13	13	23	5	7	13	10	16	8	4	21	11	7	17	0	10	11	14	9	8
HOM000395	9	11	8	9	23	18	10	11	13	9	13	16	8	8	6	6	7	10	9	8
HOM000396	15	13	8	7	9	20	15	42	16	6	8	13	6	6	1	7	9	12	13	12
HOM000398	9	11	8	5	7	23	7	24	17	10	10	16	11	9	2	11	8	16	11	10
HOM000403	16	7	9	8	15	18	10	16	10	5	11	11	7	9	2	7	11	16	7	6
HOM000409	10	9	8	8	11	17	10	22	10	8	11	14	6	7	3	7	12	16	10	8
HOM000411	11	8	9	7	10	16	9	28	12	5	7	13	9	8	8	8	7	13	9	8
HOM000414	10	10	11	6	8	21	7	15	12	11	14	11	6	9	5	10	12	16	9	8
HOM000416	11	12	11	6	9	19	10	19	13	11	10	15	8	22	1	8	8	17	11	9
HOM000418	12	12	10	10	9	25	13	15	10	6	10	12	7	6	6	7	9	19	12	11
HOM000419	6	6	10	4	4	44	12	6	19	18	11	28	15	10	0	4	8	10	3	1
HOM000420	11	12	5	10	9	22	10	23	14	20	7	16	8	11	6	9	7	14	13	9
HOM000421	8	8	13	5	6	22	8	19	9	5	11	14	6	17	1	7	8	24	10	7
HOM000422	7	8	8	13	11	21	5	25	12	13	10	14	9	8	1	10	7	11	9	8
HOM000424	11	11	8	8	7	22	11	29	13	3	9	17	9	9	1	9	10	14	9	6
HOM000425	12	10	9	7	7	14	10	21	9	7	8	18	7	9	5	8	7	14	12	10
HOM000429	11	11	8	8	11	21	11	21	11	6	7	16	7	9	4	8	8	8	10	7
HOM000432	33	26	1	10	14	15	9	24	30	11	1	8	12	1	1	10	11	1	15	9
HOM000434	12	11	13	6	13	20	6	15	10	7	14	11	7	9	4	10	17	13	15	13
HOM000444	11	11	10	7	8	15	13	23	12	9	12	14	8	11	1	7	10	19	13	12
HOM000448	9	9	9	8	7	26	11	20	12	12	10	13	6	9	7	7	7	14	5	4
HOM000452	6	10	7	7	12	13	12	14	10	10	9	12	7	8	7	8	12	8	6	5
HOM000453	14	7	8	7	6	14	4	26	13	9	10	10	6	8	4	7	7	17	8	7
HOM000455	7	7	19	7	9	17	8	18	7	5	16	11	8	20	2	6	5	18	9	8
HOM000456	10	9	11	7	13	18	9	25	13	3	9	16	7	12	5	6	6	16	8	7
HOM000457	11	12	9	6	6	14	14	16	7	11	11	10	7	12	4	5	7	14	8	6
HOM000461	9	9	6	7	6	21	10	19	10	9	8	13	8	7	5	6	5	15	13	10
HOM000462	9	4	14	7	0	7	34	5	9	14	20	12	8	11	3	9	6	8	5	1
HOM000465	7	8	7	8	6	18	7	20	11	7	10	10	8	8	7	11	7	12	10	4
HOM000466	19	16	9	11	11	7	6	32	10	8	9	9	5	12	1	3	5	12	9	8
HOM000469	9	7	8	7	7	13	5	15	6	5	10	13	6	7	5	7	8	17	8	6
HOM000475	9	9	11	6	7	17	10	18	6	5	10	11	6	9	5	13	7	20	11	5
HOM000482	8	5	10	8	4	5	46	10	5	7	17	9	13	8	3	9	6	16	2	0
HOM000486	14	9	8	7	10	14	8	18	11	8	9	15	11	7	2	10	11	10	13	10
HOM000489	4	4	4	8	7	48	19	7	5	37	3	19	4	5	1	8	9	4	5	4
HOM000490	10	9	9	6	6	14	5	21	12	4	11	10	6	7	2	6	6	17	12	11
HOM000491	5	6	5	8	6	12	23	5	8	20	12	7	10	6	7	10	13	10	6	2
HOM000492	9	9	11	9	6	18	7	9	9	11	11	12	6	12	9	6	9	15	11	10
HOM000495	8	10	9	12	6	19	11	14	9	14	9	11	9	11	4	9	9	9	19	17
HOM000499	12	12	7	10	6	18	8	13	9	6	6	11	5	8	6	7	7	11	13	12
HOM000504	10	9	5	4	7	20	12	18	7	10	17	8	6	10	9	10	6	8	8	7
HOM000505	6	8	6	8	4	12	3	16	9	4	9	13	7	9	4	7	7	11	7	5
HOM000510	12	11	7	6	6	22	7	27	10	8	7	13	6	6	0	9	8	11	5	4
HOM000512	9	8	5	5	14	8	5	26	10	4	6	16	14	5	5	9	15	10	11	9
HOM000513	11	9	10	8	6	18	13	10	11	7	10	14	6	9	5	7	7	14	10	6
HOM000518	7	7	4	9	9	24	10	19	13	6	11	18	9	5	4	9	7	7	9	8
HOM000522	9	6	7	6	4	13	14	22	7	11	10	9	5	11	5	6	8	9	6	3
HOM000523	9	9	7	6	11	14	9	11	11	13	7	13	8	7	4	7	13	11	5	4
HOM000524	8	7	4	5	8	16	4	31	10	15	5	9	7	3	2	7	10	7	8	7
HOM000529	11	9	9	8	7	22	7	15	11	9	10	14	6	8	0	7	16	10	9	5
HOM000530	8	7	8	7	6	16	5	17	8	9	6	11	6	8	5	9	6	13	10	8
HOM000532	8	7	4	4	5	11	7	26	6	6	4	7	5	2	2	4	9	8	7	4
HOM000533	8	8	8	7	7	21	5	14	11	6	8	15	7	9	4	7	7	10	9	8
HOM000535	11	10	7	8	8	19	3	28	11	5	7	15	7	6	3	8	9	9	8	7
HOM000536	9	7	9	7	6	17	7	12	10	13	13	11	6	10	2	7	5	16	6	4
HOM000539	9	4	7	7	8	20	8	21	14	11	7	15	7	9	2	10	7	10	3	2
HOM000543	9	10	19	4	4	7	5	7	6	2	15	16	4	15	2	8	13	14	7	6
HOM000544	8	8	5	7	10	16	5	10	10	1	13	8	9	12	21	7	5	7	3	2
HOM000548	7	5	7	4	8	9	14	16	8	7	5	9	4	12	4	9	5	8	10	9
HOM000549	9	6	3	12	11	12	6	29	10	13	3	16	8	3	2	14	12	7	11	10
HOM000556	7	7	6	7	9	23	6	23	9	9	5	18	7	7	2	8	8	10	7	4
HOM000558	10	11	6	8	12	15	8	13	9	6	10	10	10	7	3	7	7	8	13	12
HOM000562	11	8	6	4	6	17	8	12	9	4	8	14	7	11	2	6	9	11	10	8
HOM000571	8	6	5	6	5	14	8	23	8	6	6	9	6	6	3	6	6	9	6	4
HOM000577	8	8	7	7	7	16	8	10	13	7	9	14	7	7	0	17	7	9	11	7
HOM000583	11	10	4	10	9	9	10	14	8	12	2	14	8	3	6	6	7	2	15	14
HOM000585	5	6	11	3	10	12	4	14	6	9	11	10	5	14	2	2	3	11	5	4
HOM000586	10	8	6	4	7	11	6	14	8	4	5	9	9	10	7	9	4	12	8	6
HOM000587	7	7	4	5	6	20	6	23	10	5	6	12	8	5	4	11	9	7	6	5
HOM000592	6	5	9	5	8	10	6	10	10	10	9	15	10	13	3	9	5	11	4	3
HOM000593	8	6	8	6	7	17	8	12	10	2	9	12	7	9	1	6	6	10	7	5
HOM000594	8	4	8	4	6	10	4	21	7	8	8	6	3	11	3	17	15	6	5	2
HOM000598	9	11	6	6	6	9	5	20	5	7	10	9	6	11	4	8	9	8	11	8
HOM000599	5	6	10	4	5	14	3	9	9	7	7	11	5	9	5	4	3	13	4	3
HOM000602	11	10	3	5	6	17	5	11	10	14	5	11	7	5	2	6	7	8	7	5
HOM000603	7	6	6	6	6	9	6	21	9	5	5	9	6	6	4	5	7	9	5	2
HOM000604	6	7	7	6	13	19	6	24	9	2	8	10	6	7	2	9	8	6	9	7
HOM000607	6	7	5	5	3	13	6	19	10	5	6	9	9	2	4	7	6	6	9	5
HOM000610	5	5	4	6	9	12	8	14	10	16	8	17	9	10	3	8	7	6	5	3
HOM000612	8	5	6	7	6	19	4	19	10	13	7	11	6	6	0	5	5	11	6	2
HOM000613	5	4	8	5	2	8	14	10	6	4	10	5	10	9	1	3	17	15	5	3
HOM000615	4	4	5	5	6	15	7	23	8	4	8	10	5	8	1	7	6	11	5	2
HOM000619	10	3	6	6	6	7	15	4	6	17	13	16	7	12	3	6	8	5	1	0
HOM000621	6	5	5	6	8	12	5	11	5	24	8	8	7	7	2	20	5	5	6	4
HOM000624	10	11	4	6	7	10	4	20	11	6	4	13	7	5	2	7	16	7	5	3
HOM000627	4	3	5	7	8	14	7	24	9	14	5	8	5	5	8	5	6	5	4	2
HOM000628	6	5	6	6	4	9	3	12	7	2	6	9	10	5	4	6	6	7	5	3
HOM000634	10	9	4	5	9	13	2	41	8	4	5	12	7	3	2	7	6	4	8	7
HOM000635	11	9	6	5	5	13	6	10	10	7	5	7	6	9	3	6	6	14	7	5
HOM000636	16	8	6	5	5	8	5	14	8	8	6	14	8	4	1	5	6	9	13	8
HOM000637	7	7	7	5	5	16	8	13	8	5	8	10	5	8	2	6	6	9	7	6
HOM000644	3	3	5	5	5	7	8	11	9	9	10	5	5	10	5	6	8	7	3	2
HOM000646	10	10	7	8	8	18	9	14	10	2	6	12	7	7	2	6	5	12	8	7
HOM000648	10	8	4	4	5	15	6	10	11	6	8	9	6	6	1	5	5	8	11	5
HOM000649	8	7	8	5	4	16	9	11	10	6	9	9	6	11	2	6	7	11	10	9
HOM000653	12	16	9	3	7	8	7	9	6	3	10	6	5	13	3	4	12	8	14	10
HOM000654	6	5	8	5	3	13	9	13	6	5	8	7	5	7	3	5	5	12	6	3
HOM000655	7	6	7	7	12	11	5	16	8	4	6	5	5	8	3	5	8	11	12	10
HOM000656	9	8	6	4	3	12	7	14	4	4	9	5	4	3	1	4	4	7	7	6
HOM000658	5	5	7	4	7	15	7	21	7	4	8	9	12	6	3	4	5	8	10	9
HOM000661	7	7	1	2	15	11	13	36	8	2	2	17	7	1	0	11	5	2	8	6
HOM000671	5	5	5	5	5	15	4	18	8	5	6	7	7	4	2	6	8	13	6	5
HOM000673	0	6	8	6	8	16	5	14	10	4	7	14	8	11	0	8	8	13	5	3
HOM000674	5	6	7	5	9	16	8	14	8	5	6	15	5	6	1	9	7	13	5	4
HOM000676	6	6	8	8	5	17	4	12	13	6	8	12	6	8	0	9	7	13	5	3
HOM000679	7	7	3	9	12	17	7	15	9	6	3	8	7	2	4	6	6	4	9	7
HOM000688	6	6	6	4	6	11	7	19	7	4	7	11	5	4	3	5	6	7	5	4
HOM000690	8	8	7	6	5	15	2	13	9	6	7	12	8	5	2	8	10	11	9	7
HOM000691	5	6	7	5	12	10	5	10	9	2	16	14	11	8	1	4	8	6	7	6
HOM000695	7	7	7	4	7	18	3	14	9	5	7	8	7	7	1	6	5	9	7	5
HOM000697	6	5	6	5	4	14	9	12	9	5	5	14	7	3	1	6	5	10	4	3
HOM000698	7	7	6	5	3	9	9	21	7	9	6	10	6	4	3	6	5	7	6	4
HOM000699	6	6	6	7	6	16	7	12	7	8	7	9	7	6	5	5	4	11	10	8
HOM000700	6	6	7	7	4	25	8	12	2	13	7	19	4	5	0	5	10	6	5	4
HOM000703	5	4	6	5	6	27	10	8	7	5	4	9	5	3	2	5	11	10	4	3
HOM000721	11	10	6	4	3	15	7	18	7	11	7	8	4	9	2	4	4	6	6	5
HOM000733	8	9	4	10	3	15	10	7	7	11	5	8	6	5	2	6	7	6	13	11
HOM000735	2	1	2	4	1	1	7	3	1	1	81	4	1	1	1	3	1	9	2	1
HOM000736	3	3	6	5	9	19	9	13	6	5	11	7	4	6	1	6	5	8	4	3
HOM000737	10	6	7	3	6	9	8	9	6	6	5	8	10	9	8	3	3	5	4	2
HOM000745	15	11	5	5	6	6	5	17	4	1	4	6	6	4	3	8	6	11	4	3
HOM000747	5	5	6	7	5	13	5	17	9	6	6	11	6	6	3	6	4	7	5	4
HOM000753	4	2	3	6	10	7	4	27	7	10	3	14	4	4	0	3	6	7	3	2
HOM000758	10	10	6	3	5	13	6	14	8	5	5	11	5	8	2	5	7	7	4	3
HOM000760	3	3	5	5	7	12	4	11	9	2	6	9	6	8	7	6	5	9	3	1
HOM000766	5	6	4	5	4	14	3	13	9	8	6	11	7	5	0	5	5	10	8	7
HOM000768	6	6	5	5	3	13	6	16	6	4	7	5	4	5	3	5	5	6	4	3
HOM000770	4	3	5	3	4	9	21	9	4	13	15	4	2	6	3	5	3	14	2	1
HOM000771	8	7	5	5	6	12	6	17	11	5	6	11	5	5	2	6	6	10	7	6
HOM000773	7	7	4	13	4	7	9	6	4	2	5	6	4	3	2	5	6	5	6	5
HOM000775	4	4	8	6	5	2	16	6	5	12	10	4	6	9	1	4	6	20	2	1
HOM000778	5	5	5	6	6	15	7	12	9	6	6	11	6	4	1	6	7	11	5	4
HOM000780	6	6	6	4	6	12	4	17	2	16	9	8	4	6	4	3	3	9	4	2
HOM000791	5	5	4	4	5	8	6	16	5	4	4	7	9	1	2	5	10	14	6	3
HOM000792	5	4	4	6	4	8	16	16	5	5	4	9	5	8	4	4	11	8	8	5
HOM000797	5	5	3	7	5	13	6	10	9	5	3	13	7	3	2	14	7	6	5	4
HOM000798	7	7	5	6	5	10	4	14	6	3	5	11	4	8	1	5	4	10	8	4
HOM000799	6	8	6	3	5	5	8	10	5	1	8	8	10	8	3	6	8	8	4	2
HOM000800	6	5	4	6	8	10	6	13	7	5	4	6	6	8	3	5	9	8	6	4
HOM000802	6	6	5	6	4	10	2	18	10	4	5	13	5	7	5	5	6	8	7	4
HOM000804	5	5	4	7	8	11	9	14	5	3	4	7	4	4	3	4	5	7	7	3
HOM000805	5	5	4	2	4	12	15	16	8	5	10	8	4	5	1	4	5	10	7	6
HOM000808	8	6	5	6	5	15	5	15	6	4	5	10	5	3	1	6	8	7	5	4
HOM000811	4	5	7	5	8	8	9	15	5	5	9	5	4	7	1	6	5	9	6	4
HOM000813	4	4	7	4	4	11	6	11	6	4	7	10	5	11	2	4	4	11	3	2
HOM000814	4	4	5	5	5	10	6	14	7	3	5	13	6	5	5	5	5	7	7	6
HOM000816	5	5	4	5	3	12	3	17	6	2	5	8	3	6	5	4	7	9	6	4
HOM000817	12	6	4	4	4	10	6	8	7	2	5	8	6	4	1	4	6	7	7	5
HOM000818	7	8	3	6	4	10	1	19	11	2	4	8	5	4	2	6	7	7	6	5
HOM000822	4	5	6	5	6	11	6	14	10	3	5	8	5	5	0	11	4	10	6	4
HOM000825	11	6	6	4	5	7	9	11	6	5	5	7	3	3	6	3	4	5	5	2
HOM000826	5	5	7	4	3	10	1	12	6	10	7	7	4	6	5	5	4	7	5	4
HOM000830	9	8	6	4	6	11	2	15	9	5	6	8	5	7	2	5	6	8	8	5
HOM000836	7	6	5	4	10	10	10	5	6	5	5	8	5	2	3	4	5	5	7	6
HOM000837	6	6	7	4	8	7	20	9	7	8	5	10	5	5	0	6	5	6	4	3
HOM000838	5	5	4	5	5	10	5	21	6	3	6	8	5	5	4	5	6	5	6	4
HOM000839	7	5	7	3	2	10	5	8	9	6	8	8	4	7	1	5	4	11	6	3
HOM000841	7	8	7	4	4	16	7	12	8	5	6	8	5	5	2	5	5	8	12	9
HOM000846	5	5	6	3	4	13	7	16	5	6	5	10	7	7	1	3	5	9	7	5
HOM000850	2	3	5	4	5	9	6	10	9	5	5	6	5	5	1	10	4	8	3	2
HOM000853	4	5	7	5	5	8	3	15	8	4	7	7	4	6	0	7	4	15	5	4
HOM000854	6	6	6	3	4	12	3	16	8	6	5	10	4	5	3	4	4	8	9	7
HOM000858	3	4	5	4	3	10	8	8	3	10	4	4	5	2	1	5	2	2	3	2
HOM000868	6	7	5	6	6	13	6	12	7	2	9	7	4	6	4	6	3	5	7	6
HOM000878	6	4	5	5	6	5	4	0	7	14	5	8	3	7	2	7	8	4	8	7
HOM000880	7	5	4	4	3	6	13	18	6	5	4	6	4	7	1	3	3	4	8	7
HOM000885	7	6	7	3	7	9	3	15	6	4	5	6	4	5	2	4	6	7	9	8
HOM000886	7	5	4	5	4	21	7	10	7	4	6	7	4	3	0	6	7	8	7	5
HOM000887	8	5	4	5	4	20	7	11	5	4	5	5	5	6	5	7	3	5	3	2
HOM000889	6	6	4	4	4	27	1	8	6	4	4	8	4	4	8	6	5	5	6	4
HOM000892	4	4	5	4	5	11	6	15	7	5	5	6	5	6	2	3	3	8	4	2
HOM000893	6	3	5	5	5	10	14	16	5	2	5	6	4	2	2	4	5	8	5	2
HOM000903	4	7	6	4	5	10	3	16	7	2	8	5	4	6	2	3	4	8	4	2
HOM000906	5	4	7	3	4	10	3	6	7	4	9	7	4	5	1	5	6	10	5	2
HOM000907	6	3	3	5	3	5	2	9	4	2	4	6	5	1	2	3	5	2	4	3
HOM000916	5	5	4	5	4	7	2	17	6	6	5	9	6	3	3	5	5	4	7	6
HOM000917	11	8	4	5	4	10	5	23	7	5	6	8	3	4	0	4	2	5	7	6
HOM000919	8	5	2	3	5	7	5	9	6	4	3	10	5	3	0	7	2	3	2	1
HOM000922	9	9	6	4	4	15	8	10	7	7	5	7	5	5	0	4	3	7	12	10
HOM000924	3	3	6	6	5	11	8	15	8	3	6	9	3	6	2	4	3	10	5	4
HOM000925	6	5	6	9	2	11	4	12	5	5	7	8	5	6	3	4	3	8	5	4
HOM000930	6	7	7	2	3	7	4	6	6	4	9	10	8	8	1	6	5	11	3	2
HOM000932	4	4	3	4	6	12	5	19	6	4	5	8	5	2	1	4	5	5	5	1
HOM000934	3	3	1	2	3	7	2	13	5	4	3	6	2	5	0	2	3	42	2	0
HOM000938	5	5	5	4	3	9	6	8	5	7	6	5	4	3	4	4	6	6	5	4
HOM000941	7	6	4	4	5	10	7	2	4	6	4	17	3	2	1	4	6	6	5	3
HOM000942	3	3	3	2	2	7	7	35	4	0	3	18	2	5	1	2	4	7	5	4
HOM000946	3	4	4	4	5	12	7	14	8	4	6	8	5	3	1	5	7	10	4	3
HOM000949	8	6	4	4	6	8	5	7	8	3	5	6	8	1	2	6	3	5	5	4
HOM000956	4	4	6	4	3	9	5	11	3	9	3	11	3	3	3	4	5	5	5	2
HOM000957	8	5	6	3	5	9	5	17	6	2	2	6	3	6	2	5	3	5	3	2
HOM000965	5	5	4	5	2	10	3	12	6	6	4	6	4	4	2	4	5	11	5	4
HOM000967	5	3	4	6	3	5	5	14	5	2	13	5	3	4	0	7	3	9	3	1
HOM000972	5	5	3	4	4	7	3	13	4	4	4	6	2	4	4	4	4	3	6	5
HOM000975	3	3	2	2	4	6	6	6	3	37	2	3	4	2	1	2	3	3	3	1
HOM000984	12	5	3	3	7	2	5	17	6	1	6	2	2	4	0	10	3	6	5	3
HOM000987	5	5	3	4	4	10	3	13	6	7	3	7	4	3	2	4	6	5	6	4
HOM000988	5	3	5	3	5	11	11	13	5	6	5	6	3	4	1	4	4	5	3	2
HOM000994	7	6	5	3	6	8	3	13	4	8	4	5	3	5	2	4	4	5	5	3
HOM000996	3	3	6	4	7	7	8	10	5	3	4	5	7	4	0	5	5	8	3	2
HOM000999	5	6	3	5	9	8	1	15	4	0	3	6	6	2	5	7	8	5	4	2
HOM001000	15	18	3	3	4	9	3	11	6	6	4	7	3	6	0	5	1	5	7	5
HOM001001	6	5	4	6	5	5	2	18	6	3	4	5	4	3	2	4	4	6	5	3
HOM001002	3	3	6	3	3	16	6	9	3	1	8	4	3	5	0	3	4	9	5	4
HOM001005	5	5	4	4	3	15	7	6	6	12	3	11	6	2	0	5	5	5	4	3
HOM001006	6	4	7	3	3	7	5	5	6	1	7	7	4	9	1	3	3	12	5	4
HOM001010	6	4	4	2	4	7	7	11	8	3	3	6	4	3	4	4	4	5	6	5
HOM001011	4	3	4	5	5	12	5	10	5	3	5	6	5	6	3	4	3	7	3	2
HOM001016	4	3	1	2	3	2	22	2	3	17	5	3	6	3	3	6	6	6	3	2
HOM001017	3	3	3	4	6	8	11	10	6	9	4	5	6	4	2	8	5	6	8	7
HOM001021	4	4	3	4	3	5	3	19	7	4	3	11	4	3	2	3	5	5	4	3
HOM001023	5	5	5	3	5	8	3	11	7	4	5	7	4	4	5	4	4	5	6	5
HOM001032	1	3	2	12	5	8	4	10	4	10	3	7	4	6	0	2	5	5	4	3
HOM001034	7	7	4	2	3	10	5	13	3	5	6	4	2	4	0	2	3	4	5	3
HOM001035	3	4	4	5	3	8	3	7	5	4	4	5	4	4	4	6	4	7	6	4
HOM001040	7	5	6	5	8	7	3	18	2	0	6	3	3	5	0	4	4	6	3	2
HOM001048	5	5	5	4	6	6	5	5	5	3	6	7	4	4	0	3	4	8	4	3
HOM001050	7	5	5	2	3	6	5	12	4	3	5	7	2	6	1	4	4	14	4	3
HOM001051	3	3	6	6	2	9	5	18	6	5	7	6	3	4	2	2	3	5	2	1
HOM001053	4	3	3	2	6	3	6	23	3	1	5	5	3	2	1	4	5	4	5	4
HOM001055	4	4	4	4	3	7	5	11	5	7	3	8	4	5	5	6	3	6	5	4
HOM001057	3	3	4	2	3	12	6	16	4	5	5	6	3	4	2	3	1	5	3	2
HOM001059	6	5	3	4	5	8	4	16	4	5	3	7	4	2	2	5	2	2	5	3
HOM001062	4	4	5	5	4	6	3	12	3	2	6	4	4	4	2	3	3	6	4	2
HOM001064	4	2	18	1	8	8	3	15	3	18	3	3	0	8	0	2	1	6	2	1
HOM001067	7	6	5	5	5	8	4	13	5	4	5	5	2	5	0	5	3	9	5	4
HOM001071	6	5	3	4	5	10	8	10	5	6	5	7	3	3	1	4	4	6	4	3
HOM001074	4	4	4	3	3	7	2	14	5	7	4	11	3	5	2	3	4	6	3	2
HOM001080	6	5	5	2	3	5	1	11	4	2	7	9	3	5	3	3	3	10	6	5
HOM001083	3	3	4	5	6	7	2	14	10	5	2	7	5	3	1	6	5	6	4	3
HOM001084	5	4	3	3	5	8	3	14	4	5	3	5	3	3	3	3	4	5	4	3
HOM001085	6	7	4	2	5	9	4	7	5	5	7	7	4	7	1	4	3	6	4	2
HOM001086	43	43	1	1	1	1	1	1	1	1	1	1	1	1	1	1	1	1	14	11
HOM001099	5	5	4	2	3	10	5	11	6	5	5	7	3	3	2	4	3	5	4	3
HOM001105	4	5	3	4	3	12	4	14	7	2	4	4	4	3	1	4	4	9	5	4
HOM001107	4	4	4	5	4	8	1	10	8	4	4	9	5	3	0	5	5	7	3	2
HOM001108	4	4	3	3	4	10	2	11	8	7	5	6	4	6	2	3	4	7	8	3
HOM001112	8	6	2	3	3	6	3	14	4	5	3	5	4	3	2	4	8	4	5	4
HOM001113	5	5	4	3	3	6	3	7	6	2	6	5	4	5	4	3	4	11	6	4
HOM001114	4	3	5	5	5	6	5	9	6	6	5	6	5	4	3	4	4	7	5	4
HOM001116	4	4	4	5	5	7	3	13	5	3	4	6	4	5	5	2	3	6	5	2
HOM001118	8	8	2	2	6	4	3	10	8	7	2	4	3	2	1	11	5	2	3	2
HOM001120	4	4	5	3	3	8	5	6	6	4	6	7	3	8	0	3	3	9	4	2
HOM001121	2	2	3	4	5	7	3	12	5	7	6	8	4	2	0	5	4	8	3	1
HOM001124	4	5	5	3	3	8	3	11	4	5	5	4	2	5	2	2	2	19	7	6
HOM001127	4	3	5	3	5	10	3	10	5	2	5	5	3	4	0	4	3	6	3	1
HOM001128	6	3	3	2	2	7	4	11	3	1	3	4	3	8	7	4	5	4	5	3
HOM001132	7	6	5	2	2	12	1	20	5	0	4	8	4	5	2	3	3	3	5	4
HOM001134	6	5	4	3	6	9	4	8	9	3	5	10	4	3	0	4	5	6	6	5
HOM001138	6	7	7	3	2	6	3	11	5	6	5	7	3	7	2	2	2	6	5	4
HOM001140	3	3	3	3	4	5	5	10	5	3	5	5	4	4	1	3	3	6	4	1
HOM001142	4	6	5	4	4	10	0	10	5	5	6	7	5	4	0	3	4	5	4	3
HOM001147	5	4	3	3	5	7	6	7	3	3	5	4	3	4	2	3	3	3	3	2
HOM001148	7	4	5	5	4	8	1	10	4	3	5	5	3	6	1	4	4	8	4	3
HOM001151	3	3	3	3	4	13	7	11	7	5	3	6	4	5	2	4	4	5	1	0
HOM001154	6	4	2	3	2	6	10	10	4	6	3	6	5	4	1	5	3	9	4	2
HOM001157	6	6	3	4	3	9	2	13	6	5	3	6	3	4	2	3	3	5	7	6
HOM001161	16	2	3	1	2	2	5	25	1	6	2	2	2	14	2	1	1	2	3	2
HOM001162	6	5	4	2	2	10	5	10	5	8	4	6	3	3	1	3	3	5	8	7
HOM001167	3	3	4	3	2	7	2	14	6	3	4	10	4	5	1	4	3	10	3	2
HOM001176	2	2	6	4	4	9	2	2	7	3	3	6	3	5	5	4	4	4	2	1
HOM001178	3	3	3	4	3	5	2	20	5	3	2	5	3	2	4	5	2	4	3	2
HOM001180	2	2	3	3	4	7	7	14	7	4	2	6	4	1	0	4	5	2	2	1
HOM001183	5	5	4	4	3	6	2	15	4	0	4	6	3	5	1	3	3	6	3	2
HOM001187	3	3	3	3	5	11	6	4	4	17	3	3	5	3	1	7	5	5	5	3
HOM001194	4	4	4	4	5	10	6	9	6	3	4	8	3	3	3	3	5	6	5	3
HOM001199	2	2	1	3	2	9	4	8	5	4	9	10	4	6	2	4	1	12	1	0
HOM001211	4	4	4	5	4	13	8	6	5	8	3	5	4	6	0	3	3	3	7	6
HOM001212	6	5	5	3	3	10	3	6	6	4	6	5	3	5	1	3	3	8	4	2
HOM001215	7	7	5	5	5	7	10	4	4	3	2	5	3	1	1	4	3	2	4	2
HOM001218	3	3	3	5	4	8	8	10	4	3	3	4	3	2	1	4	5	5	4	2
HOM001225	5	6	4	5	4	5	2	7	6	5	6	7	3	3	0	3	4	9	6	5
HOM001226	5	5	5	3	3	5	2	7	4	7	4	5	4	4	0	3	4	4	5	4
HOM001233	6	6	4	3	4	6	6	9	5	9	4	3	3	2	0	4	3	5	4	2
HOM001235	3	3	4	4	7	8	2	9	5	2	4	6	3	2	0	6	4	7	3	1
HOM001241	3	3	3	2	3	12	9	11	6	3	3	4	3	3	0	6	3	5	4	3
HOM001242	7	4	6	1	2	7	2	8	3	2	6	5	3	5	1	3	4	9	4	3
HOM001243	6	4	1	3	2	11	7	15	4	4	2	5	2	1	1	3	5	1	5	4
HOM001245	2	5	5	3	5	5	2	7	3	4	7	4	3	4	3	4	6	7	3	2
HOM001248	3	3	4	2	3	5	4	11	4	1	3	5	2	5	2	2	2	5	4	3
HOM001251	4	5	6	3	3	8	4	5	4	5	4	5	2	7	2	6	3	5	6	5
HOM001254	3	3	3	4	4	6	3	10	3	3	3	6	3	4	3	3	3	3	3	2
HOM001255	6	4	2	3	5	4	2	26	2	3	2	3	2	2	2	2	5	1	2	0
HOM001272	3	4	10	2	2	5	2	7	2	0	11	4	2	9	1	2	4	11	3	2
HOM001274	2	2	3	5	4	6	5	9	3	3	3	4	3	3	2	6	4	3	3	1
HOM001276	11	5	2	3	3	7	4	8	2	4	3	4	3	4	3	2	2	5	3	2
HOM001278	3	3	3	4	5	7	4	6	5	3	4	8	5	3	3	3	4	3	2	1
HOM001282	5	5	5	3	4	6	4	9	4	0	5	3	4	5	1	4	3	4	5	4
HOM001295	5	3	4	2	2	9	4	11	3	3	3	4	3	3	2	6	2	4	3	2
HOM001296	2	3	2	3	3	5	1	12	3	3	10	5	1	6	3	3	5	3	2	0
HOM001297	3	3	3	3	3	5	4	9	3	3	4	5	4	2	3	4	3	5	4	3
HOM001299	5	4	6	2	2	4	6	5	4	2	6	4	2	2	1	2	2	9	7	2
HOM001301	3	3	5	4	3	2	3	7	3	7	1	4	2	3	4	2	4	4	3	1
HOM001302	4	3	5	2	4	10	5	6	4	9	4	4	3	3	1	3	3	6	3	2
HOM001305	2	2	4	2	5	9	6	9	4	7	4	6	3	1	1	4	5	4	3	2
HOM001312	4	5	3	3	5	2	2	1	11	2	4	6	10	6	0	8	2	3	2	1
HOM001314	5	3	6	3	4	6	3	10	2	5	4	5	2	3	2	3	3	6	4	2
HOM001317	2	2	6	2	2	6	4	6	2	18	3	4	2	4	0	2	3	6	6	4
HOM001318	4	3	3	2	4	4	3	6	4	7	2	4	3	2	4	4	6	5	2	1
HOM001319	7	4	9	2	4	4	1	6	4	3	4	4	5	8	1	5	3	5	3	2
HOM001324	2	2	2	2	29	3	2	3	3	1	4	3	3	2	0	3	12	4	2	1
HOM001335	4	4	4	3	4	5	1	6	5	2	4	7	3	5	3	4	4	4	3	2
HOM001343	4	4	3	3	3	9	2	8	6	0	3	9	6	3	2	4	4	7	6	5
HOM001345	5	5	7	3	3	9	2	7	4	7	4	3	3	4	1	2	3	11	4	3
HOM001350	2	3	3	5	2	8	8	8	6	4	3	7	3	2	1	7	3	4	7	6
HOM001359	4	3	4	3	1	3	3	9	4	3	4	2	2	5	3	7	2	5	3	2
HOM001363	4	4	3	1	3	6	3	10	2	2	4	5	2	6	1	3	5	6	7	5
HOM001365	5	3	3	2	2	8	3	9	4	3	3	3	3	3	7	2	4	5	3	1
HOM001366	5	3	3	3	5	6	0	10	6	2	2	8	4	2	2	4	4	7	5	2
HOM001370	6	4	0	2	1	6	13	4	7	20	0	11	1	0	0	3	7	0	4	3
HOM001371	5	5	5	2	2	2	1	10	3	2	5	5	3	8	4	3	4	11	7	5
HOM001384	3	4	4	4	1	5	4	7	5	1	4	4	3	2	2	3	3	8	4	3
HOM001389	4	4	5	4	3	10	3	1	5	4	6	7	2	4	0	4	5	5	4	2
HOM001390	4	4	4	4	3	10	3	7	3	2	5	4	4	7	1	4	4	5	7	4
HOM001391	3	3	3	1	5	7	2	21	3	2	3	4	2	3	2	4	2	4	3	2
HOM001395	4	3	4	2	1	4	1	1	1	1	11	2	1	7	14	1	1	7	6	5
HOM001397	4	3	3	1	3	9	4	8	5	5	3	12	3	3	3	3	3	2	5	3
HOM001401	4	3	4	4	2	6	0	7	4	4	3	3	3	2	2	5	3	8	3	2
HOM001403	3	3	3	4	4	7	3	7	7	3	4	6	3	5	3	3	3	6	3	2
HOM001417	3	3	3	3	2	5	7	10	3	3	3	4	3	2	2	3	4	5	4	2
HOM001422	4	4	3	4	3	8	3	7	6	2	4	4	3	1	1	3	4	5	7	6
HOM001426	3	3	7	2	2	2	2	7	8	3	6	5	8	6	2	3	1	3	4	2
HOM001433	5	4	3	4	3	5	2	9	3	3	4	4	3	4	1	4	4	3	8	7
HOM001441	3	3	9	2	2	5	19	5	3	4	3	4	2	2	1	3	3	3	3	2
HOM001445	3	3	4	3	4	9	5	6	5	2	7	6	3	5	0	3	3	3	6	5
HOM001448	2	3	4	4	4	5	3	6	3	3	3	4	3	3	0	3	4	3	3	2
HOM001449	3	3	2	3	2	5	2	9	5	2	4	3	4	1	4	4	3	2	4	3
HOM001450	4	5	3	3	5	5	0	14	4	3	3	7	2	8	0	3	3	3	4	1
HOM001451	3	3	2	3	2	6	2	9	3	2	2	4	2	2	1	2	3	2	4	2
HOM001461	2	3	3	4	3	5	2	5	3	3	2	4	3	2	4	4	3	7	2	1
HOM001465	6	5	2	3	6	10	6	10	3	3	3	3	5	3	0	4	1	4	1	0
HOM001487	5	4	5	4	4	10	3	6	4	2	3	5	4	6	0	4	3	4	5	4
HOM001495	4	5	4	3	3	7	2	11	5	1	5	5	5	3	0	5	5	3	3	2
HOM001509	1	2	1	2	5	10	3	7	1	26	1	1	6	2	2	1	1	2	1	0
HOM001511	4	4	3	4	3	6	3	4	5	3	3	5	3	3	4	4	2	4	4	1
HOM001518	4	4	3	2	3	5	5	5	3	0	4	3	2	2	7	2	2	7	3	2
HOM001522	3	3	2	2	3	5	3	6	3	2	2	7	2	2	1	2	3	4	4	3
HOM001523	3	4	3	2	3	5	2	11	3	4	3	4	2	3	1	3	6	4	7	6
HOM001525	2	2	3	2	1	4	2	22	2	1	3	4	2	3	0	2	2	5	2	1
HOM001526	3	3	2	2	4	6	2	11	4	6	2	4	2	2	0	2	5	3	2	0
HOM001527	5	4	2	3	3	5	3	7	3	2	4	4	3	3	1	3	3	5	6	5
HOM001530	4	3	3	3	6	4	1	12	5	2	4	4	3	3	1	3	2	7	3	2
HOM001532	3	3	3	3	2	9	3	5	5	3	3	6	2	3	3	3	4	3	3	2
HOM001533	3	3	5	4	3	7	3	6	2	2	5	5	2	5	1	3	3	5	3	2
HOM001535	4	5	0	5	6	2	2	13	7	4	0	9	5	0	11	3	1	0	2	1
HOM001542	1	1	2	1	1	4	2	23	3	1	3	5	2	2	0	3	5	3	1	0
HOM001545	3	2	3	3	2	7	4	5	5	1	4	4	5	3	1	3	5	4	1	0
HOM001546	3	3	3	3	2	4	1	8	5	6	4	4	2	1	2	3	3	6	2	1
HOM001548	3	3	4	3	2	7	8	6	5	1	4	4	3	4	1	2	2	4	2	1
HOM001550	2	3	3	3	2	8	1	4	5	8	3	9	6	3	0	5	3	5	2	1
HOM001551	4	4	3	4	2	5	3	8	3	5	3	6	3	1	1	3	3	3	4	2
HOM001556	2	4	4	7	2	8	6	8	4	3	2	4	2	3	0	3	3	3	8	6
HOM001559	3	3	2	3	2	7	4	7	7	5	2	6	3	3	6	3	3	3	4	3
HOM001561	1	2	1	1	51	4	2	2	2	2	1	2	1	1	0	1	0	1	1	0
HOM001569	3	3	2	2	2	6	5	6	6	4	3	10	4	2	1	3	3	5	4	3
HOM001570	3	4	3	2	3	6	3	6	3	3	4	4	2	3	4	2	2	4	4	3
HOM001574	3	4	2	4	2	3	2	9	3	1	4	4	2	3	1	2	4	3	3	2
HOM001577	3	3	3	3	3	3	1	7	3	2	3	4	4	2	2	3	3	3	3	2
HOM001585	3	2	4	1	2	10	4	0	2	8	2	5	1	4	2	2	2	10	1	0
HOM001590	3	3	3	2	3	6	1	5	5	3	3	6	2	3	1	3	2	6	3	2
HOM001595	3	3	3	2	1	4	1	5	4	5	3	4	3	3	3	3	3	5	3	2
HOM001604	4	4	5	6	2	3	2	6	5	2	4	5	3	4	1	3	4	4	7	6
HOM001614	2	2	2	6	2	2	5	5	2	1	2	4	3	3	2	4	2	5	3	2
HOM001617	2	2	2	4	3	6	3	8	3	4	2	6	3	2	2	3	2	1	3	2
HOM001620	2	2	2	1	2	12	2	10	5	1	2	10	3	2	1	2	5	3	2	0
HOM001628	2	2	3	2	4	6	3	7	3	4	2	5	5	3	3	2	2	3	3	2
HOM001633	2	3	2	1	4	4	4	4	5	0	3	6	2	5	15	5	2	3	1	0
HOM001635	3	3	2	2	4	8	2	6	2	4	4	4	4	3	1	4	2	3	3	2
HOM001638	4	4	3	3	3	9	2	5	6	0	2	5	3	4	0	6	4	4	4	3
HOM001640	2	2	3	2	2	11	3	7	4	4	3	3	2	3	0	2	2	8	2	1
HOM001644	2	2	2	2	2	4	3	11	3	5	2	3	3	2	2	2	2	3	4	3
HOM001645	3	4	3	2	1	7	2	4	3	6	6	3	3	3	4	2	1	3	3	2
HOM001649	3	4	3	2	3	7	3	7	5	3	2	6	4	5	2	3	2	7	3	1
HOM001650	3	2	2	1	3	7	7	4	2	3	2	2	3	2	2	2	2	5	2	1
HOM001654	2	2	3	3	3	10	0	7	4	8	3	5	3	4	2	3	1	4	2	1
HOM001655	2	3	3	3	1	4	2	5	6	0	3	4	2	2	5	3	6	3	6	0
HOM001657	3	3	3	2	3	4	5	10	3	5	3	4	2	3	0	2	2	3	3	2
HOM001661	2	3	2	2	2	8	4	7	4	7	2	6	2	2	2	3	7	3	3	2
HOM001666	2	3	2	2	3	7	4	4	4	4	3	4	2	2	0	3	5	2	2	0
HOM001674	2	2	3	2	2	4	6	6	4	4	2	2	3	2	2	2	3	4	2	1
HOM001681	3	2	3	2	3	3	5	3	2	12	2	3	2	2	2	1	2	4	2	1
HOM001683	2	2	9	1	1	2	1	2	2	0	14	2	1	6	0	1	3	6	3	0
HOM001685	4	4	2	5	3	5	4	7	3	2	3	3	2	2	2	2	3	2	5	4
HOM001688	4	4	0	3	4	10	4	13	6	4	0	6	3	0	2	3	3	1	2	1
HOM001691	3	4	2	2	4	6	1	9	3	2	3	3	3	2	0	3	11	2	4	2
HOM001696	3	3	3	3	1	8	2	2	2	2	3	2	2	10	1	3	2	4	4	3
HOM001698	3	3	4	3	2	6	2	7	6	6	3	4	2	3	3	1	2	4	11	5
HOM001701	5	5	3	2	2	4	4	5	3	4	3	2	2	5	1	2	2	7	3	2
HOM001710	2	4	3	4	3	8	3	4	6	5	2	6	3	4	0	4	1	4	8	6
HOM001712	3	3	3	4	3	6	3	8	6	2	3	6	3	3	0	3	3	3	3	2
HOM001716	5	5	3	2	2	6	2	2	4	3	2	3	3	2	2	4	4	1	4	3
HOM001723	5	3	3	2	4	6	0	8	3	2	3	4	2	3	1	2	3	4	2	1
HOM001725	2	2	3	1	5	2	1	2	3	1	11	6	2	4	1	2	1	5	5	3
HOM001726	8	3	2	2	2	4	5	10	4	2	1	5	2	2	0	1	1	4	2	1
HOM001728	3	5	4	2	2	5	6	2	4	1	4	4	2	5	1	3	2	8	7	5
HOM001734	2	2	2	1	2	6	5	8	3	6	3	3	2	2	0	2	2	9	3	1
HOM001735	6	4	4	2	3	6	1	11	3	1	2	4	2	0	2	2	2	5	4	3
HOM001737	4	4	2	3	2	4	2	4	3	2	3	4	2	3	0	2	6	8	5	2
HOM001741	3	3	4	4	2	6	4	6	4	3	3	4	3	2	0	4	3	4	2	1
HOM001742	3	3	2	2	3	4	2	8	2	4	2	3	2	3	2	2	2	5	4	3
HOM001744	3	3	2	2	5	5	1	7	5	2	2	4	2	3	0	2	3	6	2	1
HOM001747	7	5	2	1	4	2	1	9	1	5	4	4	2	3	0	2	2	1	4	2
HOM001749	5	4	1	1	4	7	6	11	3	1	2	1	2	2	3	1	1	3	6	3
HOM001750	4	2	2	2	1	5	3	8	2	3	2	3	4	4	1	2	3	2	3	2
HOM001753	2	2	2	3	2	7	4	5	4	2	2	5	5	1	0	3	3	4	2	1
HOM001755	3	2	3	2	1	5	1	4	2	6	5	4	2	3	3	3	2	5	1	0
HOM001756	2	2	2	3	3	4	1	15	3	1	2	4	2	2	0	2	2	2	2	1
HOM001758	2	2	4	3	2	7	2	7	2	3	5	5	2	5	0	2	2	6	3	2
HOM001760	7	3	2	2	2	4	3	8	2	1	2	4	3	2	2	3	4	2	4	3
HOM001762	2	2	4	2	1	2	1	4	4	7	5	3	3	3	3	2	1	4	3	2
HOM001763	3	3	3	3	4	4	1	7	5	0	3	4	3	3	1	3	2	5	2	1
HOM001766	4	5	1	2	2	8	2	7	11	5	1	7	3	1	1	2	2	2	4	3
HOM001773	4	3	3	2	3	6	2	6	2	3	5	3	2	3	0	3	2	3	3	2
HOM001776	4	4	2	0	2	6	1	7	4	6	3	4	2	2	2	3	2	4	2	1
HOM001781	7	7	2	3	5	6	1	8	5	1	2	4	3	2	0	3	3	2	3	2
HOM001784	3	3	4	1	9	4	2	6	3	0	5	4	1	6	1	2	1	4	4	3
HOM001787	7	4	2	4	2	4	1	13	4	3	2	4	2	2	1	2	2	5	3	1
HOM001788	2	3	3	6	3	6	3	5	4	2	3	5	2	3	2	3	3	4	2	1
HOM001790	2	3	3	3	3	5	2	5	4	4	3	5	2	2	2	3	3	4	5	3
HOM001797	2	2	3	2	3	4	3	4	4	3	2	4	3	3	2	3	2	2	3	2
HOM001801	3	3	2	3	2	6	2	2	4	2	4	5	2	2	0	3	3	4	3	1
HOM001803	3	6	3	2	2	4	1	6	3	1	3	3	2	3	2	2	2	3	4	3
HOM001806	2	2	2	3	5	3	4	2	3	1	3	4	2	2	2	4	2	3	3	2
HOM001808	5	4	2	2	4	10	0	5	5	2	2	5	3	0	1	3	3	3	6	4
HOM001823	2	2	2	3	2	10	6	4	4	4	5	4	3	4	0	3	1	4	3	2
HOM001828	5	3	2	2	2	3	4	12	3	4	2	4	2	2	1	2	2	3	2	1
HOM001829	7	3	2	2	3	4	3	7	3	0	2	2	3	1	0	2	2	3	3	2
HOM001837	6	3	4	3	2	5	4	6	3	2	3	3	3	3	0	2	4	4	4	3
HOM001841	3	3	3	2	2	4	3	7	2	1	3	4	2	3	2	2	2	3	3	2
HOM001842	3	3	1	4	6	5	7	3	2	1	5	5	2	3	1	1	2	3	3	0
HOM001846	3	2	2	2	2	6	3	10	3	5	2	4	2	1	1	4	2	5	2	1
HOM001848	6	4	1	2	5	7	3	10	3	1	1	5	2	0	1	7	3	1	4	3
HOM001850	4	3	5	3	3	6	5	9	2	0	3	2	2	3	2	1	2	3	5	4
HOM001852	8	6	2	4	3	3	7	2	2	2	2	2	4	2	3	3	2	3	5	3
HOM001854	1	1	6	1	1	4	1	1	1	2	16	1	1	5	1	3	0	4	1	0
HOM001855	4	4	3	3	3	3	3	7	3	0	3	4	2	3	2	2	2	5	4	3
HOM001856	2	2	4	1	4	6	3	8	5	1	2	5	4	4	3	1	4	3	4	3
HOM001858	2	1	2	1	2	4	2	3	4	4	4	4	3	1	3	1	7	2	1	0
HOM001863	4	3	1	3	2	8	5	10	3	3	1	5	3	1	1	3	3	1	3	2
HOM001867	4	3	3	2	4	7	5	6	3	3	2	4	2	0	0	2	4	3	3	2
HOM001869	3	3	2	2	3	5	2	5	4	4	2	4	4	2	1	3	2	3	3	1
HOM001874	3	2	3	2	1	2	2	5	2	6	5	3	1	6	3	2	3	3	2	1
HOM001880	3	2	2	2	2	3	4	7	4	1	3	5	2	2	0	2	4	4	2	1
HOM001884	3	3	2	2	1	4	4	8	1	1	2	2	1	4	2	1	2	7	3	2
HOM001888	3	3	3	2	1	4	3	2	3	2	3	3	2	2	1	2	5	4	4	3
HOM001891	2	2	2	2	1	2	3	8	1	0	2	1	1	2	1	1	1	25	1	0
HOM001893	5	3	2	2	1	3	2	13	3	0	2	2	2	1	6	2	3	4	2	0
HOM001906	2	1	1	36	2	2	3	4	1	0	1	1	1	2	0	1	1	1	2	1
HOM001908	11	5	2	4	3	4	4	5	2	2	2	1	4	2	1	2	2	2	1	0
HOM001911	2	2	3	2	2	6	2	3	4	3	3	4	2	3	1	2	2	6	4	3
HOM001914	4	2	3	2	2	3	2	8	3	4	2	3	2	3	2	3	2	3	4	3
HOM001921	2	2	2	4	2	5	2	10	3	1	2	3	2	2	1	4	2	2	2	0
HOM001933	2	2	2	5	3	4	3	11	2	1	3	4	2	2	1	2	4	5	2	1
HOM001935	2	3	3	3	2	7	5	4	3	2	2	4	3	2	0	2	2	3	2	1
HOM001936	5	2	2	3	2	4	3	5	5	2	2	3	2	1	0	2	3	7	2	1
HOM001944	2	3	3	3	2	4	1	4	3	1	3	4	4	2	1	3	2	5	2	1
HOM001945	4	3	2	2	2	4	3	4	3	2	3	4	3	5	1	3	2	2	2	1
HOM001953	6	2	1	1	1	6	6	11	3	5	1	2	1	1	4	1	7	2	2	1
HOM001954	2	2	4	2	2	4	2	6	2	2	3	3	3	3	1	2	2	2	2	1
HOM001961	3	3	2	2	2	5	2	3	4	3	2	4	2	3	5	3	3	2	4	2
HOM001965	5	4	2	1	2	5	1	4	3	1	3	3	2	4	1	3	2	3	2	1
HOM001967	6	3	4	2	3	6	1	3	2	2	3	5	2	4	0	2	3	6	6	5
HOM001972	3	4	0	3	3	9	4	4	4	4	1	5	6	1	0	4	4	1	2	1
HOM001982	1	1	2	2	3	4	2	4	3	3	2	3	2	2	18	3	2	3	1	0
HOM001986	3	3	2	1	2	4	2	5	3	2	2	5	2	2	2	2	3	6	3	2
HOM001991	3	3	3	2	3	4	0	16	3	2	1	3	3	1	0	3	2	0	2	1
HOM001995	2	2	2	3	3	4	1	2	3	3	3	5	2	5	2	2	2	8	3	2
HOM001996	0	2	2	2	1	4	4	3	2	3	3	5	2	3	1	4	2	3	6	4
HOM002000	3	3	2	1	2	4	2	7	3	2	3	4	4	2	1	3	2	2	3	1
HOM002004	2	2	2	3	3	4	2	10	4	2	3	3	3	2	1	3	3	3	2	1
HOM002005	2	2	2	3	2	7	1	6	2	3	3	4	2	5	1	2	2	5	3	2
HOM002007	1	2	2	2	2	4	3	8	4	1	2	6	2	1	1	2	2	4	2	1
HOM002017	3	3	2	2	2	2	0	4	3	1	2	4	2	1	0	2	2	7	3	2
HOM002018	4	4	2	2	2	8	2	5	4	4	2	4	2	3	0	2	2	4	7	5
HOM002019	2	2	2	2	2	4	1	4	2	4	2	4	2	4	3	4	2	2	4	3
HOM002022	2	2	3	2	1	7	2	8	4	4	3	4	2	4	0	2	2	6	3	2
HOM002023	2	2	2	2	2	3	2	4	3	1	1	2	1	2	11	2	2	5	3	2
HOM002037	3	3	1	3	2	6	5	8	2	1	2	4	7	3	0	2	3	2	3	2
HOM002046	5	4	3	1	1	3	3	4	3	1	4	2	1	5	1	1	2	7	2	1
HOM002050	2	2	3	2	1	4	2	3	4	2	5	4	2	3	1	2	1	5	1	0
HOM002053	3	3	2	1	5	7	5	3	3	2	2	2	2	1	1	4	1	1	3	2
HOM002062	3	4	2	2	2	2	5	2	3	0	2	3	5	3	1	2	15	2	3	1
HOM002065	2	2	3	2	4	6	3	9	3	2	2	6	3	2	0	3	2	4	2	1
HOM002069	3	2	1	1	1	4	3	5	2	1	2	4	1	3	2	1	2	3	3	2
HOM002070	2	2	2	2	2	4	1	11	3	3	2	3	2	2	1	2	4	4	2	1
HOM002075	2	2	2	1	1	2	5	10	2	1	3	2	1	1	1	2	1	7	2	1
HOM002079	2	2	1	2	3	6	4	8	4	3	1	3	2	2	1	2	2	3	2	1
HOM002080	2	2	3	2	3	2	2	5	3	3	3	4	2	3	1	2	2	5	2	1
HOM002083	5	3	2	1	1	4	5	5	2	2	2	4	1	2	3	2	1	6	1	0
HOM002087	2	2	2	2	4	4	2	10	2	5	2	3	2	0	1	1	2	2	1	0
HOM002091	2	2	3	3	2	4	2	4	3	1	3	5	1	7	0	2	2	4	2	1
HOM002095	3	3	2	2	2	4	1	7	4	5	2	4	2	2	0	2	1	3	1	0
HOM002102	2	5	2	3	3	9	3	5	4	1	2	5	3	0	1	3	3	3	8	6
HOM002104	3	3	2	2	2	4	1	4	3	1	2	2	2	2	1	2	3	3	3	2
HOM002106	3	4	3	2	2	5	2	3	6	3	3	4	2	3	1	2	2	6	4	3
HOM002109	1	3	1	2	1	6	3	2	4	0	2	4	3	1	2	3	4	2	4	3
HOM002115	3	2	3	1	4	2	3	6	1	5	3	5	3	1	0	3	2	4	3	2
HOM002119	4	3	5	2	2	6	1	5	2	1	4	4	2	4	1	2	3	4	2	1
HOM002124	2	2	2	3	2	6	4	5	4	3	2	6	2	1	0	3	3	5	2	1
HOM002125	1	1	3	1	1	4	0	4	2	3	3	2	7	3	0	1	1	4	4	0
HOM002126	2	2	1	1	3	2	3	3	3	5	1	4	3	1	6	2	2	1	2	1
HOM002127	2	3	2	2	2	3	4	4	3	3	4	4	1	3	2	2	1	3	3	2
HOM002131	3	4	3	2	2	4	2	4	3	1	4	2	2	4	1	2	3	6	2	0
HOM002133	4	3	2	2	3	7	2	3	2	0	2	4	2	2	2	2	2	5	4	3
HOM002140	4	5	2	2	2	6	2	2	2	1	3	6	2	5	2	2	2	2	5	2
HOM002142	2	2	1	1	2	7	2	6	4	16	1	4	1	2	0	2	3	2	2	1
HOM002145	1	1	1	2	4	10	8	7	4	5	2	3	2	0	0	3	3	3	2	0
HOM002150	3	2	2	3	2	4	1	5	4	3	2	5	3	1	1	4	2	3	2	1
HOM002159	2	2	3	2	4	5	1	6	3	1	2	5	2	3	1	2	2	3	2	1
HOM002165	2	2	5	1	2	2	0	2	2	1	5	2	1	4	2	2	1	5	2	1
HOM002168	1	1	2	2	2	5	3	9	4	2	3	4	2	1	1	2	3	2	1	0
HOM002170	2	3	2	2	6	2	3	4	2	3	3	2	1	5	0	1	1	3	2	0
HOM002176	3	3	1	2	3	6	4	9	2	1	2	3	2	2	1	2	2	3	3	2
HOM002177	2	2	2	2	2	4	2	6	2	4	2	3	1	3	0	2	4	4	3	1
HOM002198	3	2	4	2	4	4	0	3	4	1	3	3	4	1	2	3	3	2	2	1
HOM002200	6	3	1	1	1	2	3	8	2	5	1	3	1	3	2	3	1	1	4	3
HOM002201	2	2	1	5	2	5	5	5	4	2	1	3	2	1	1	2	3	1	5	4
HOM002216	4	3	2	1	2	6	2	5	3	2	3	4	1	2	1	2	2	4	7	5
HOM002217	3	3	2	3	2	4	4	6	3	6	2	4	1	3	1	2	2	1	2	1
HOM002221	4	4	1	1	3	6	2	9	3	4	1	2	2	1	1	3	2	2	3	2
HOM002222	5	2	2	3	2	4	4	5	1	3	2	3	1	1	0	2	2	4	1	0
HOM002225	2	2	3	2	2	6	2	4	2	1	4	5	2	2	0	2	2	4	3	2
HOM002228	3	2	1	1	4	4	2	11	3	2	2	3	1	2	0	2	0	3	1	0
HOM002231	3	2	2	2	1	4	2	7	3	4	2	3	1	3	2	3	2	4	1	0
HOM002235	3	3	2	1	2	6	3	7	2	3	1	3	2	2	2	1	2	3	2	1
HOM002243	2	2	2	5	2	3	2	3	3	0	2	4	2	2	1	2	1	4	7	6
HOM002258	2	2	1	2	2	3	9	7	4	2	1	1	1	1	1	1	2	2	3	1
HOM002259	4	3	2	2	1	3	3	5	3	0	2	3	2	2	0	2	2	3	3	2
HOM002261	2	2	1	2	3	8	3	8	2	2	2	3	3	2	1	3	4	3	2	1
HOM002267	2	3	2	2	2	5	2	3	4	1	2	3	2	0	1	2	3	6	4	3
HOM002276	5	3	2	6	3	4	3	1	2	3	2	3	2	4	0	1	4	3	7	5
HOM002280	2	2	2	2	3	4	3	3	2	1	2	4	2	3	2	2	2	3	2	1
HOM002283	2	2	2	1	2	5	1	2	2	1	2	4	2	2	2	2	2	3	2	1
HOM002288	2	2	2	1	3	4	1	13	2	1	3	2	1	3	1	2	2	2	3	2
HOM002289	2	2	2	1	4	2	1	12	4	1	2	3	2	2	1	2	2	3	2	1
HOM002306	3	3	3	2	3	4	2	3	4	2	4	3	2	3	2	2	2	3	5	3
HOM002311	1	1	1	1	2	3	5	1	1	17	2	3	1	1	1	1	3	3	2	1
HOM002313	3	3	3	2	1	5	2	2	3	3	3	2	4	2	1	2	2	5	6	5
HOM002328	2	2	4	3	2	8	4	2	3	3	4	4	2	3	0	1	2	3	3	2
HOM002335	4	2	2	1	1	2	1	3	2	3	2	3	1	2	1	2	7	4	2	1
HOM002340	2	2	2	2	2	7	3	6	5	2	2	4	3	2	1	2	1	3	2	1
HOM002351	2	2	2	3	1	6	6	5	3	1	2	2	3	2	1	1	2	6	2	1
HOM002354	2	2	1	6	4	2	5	5	2	0	1	3	1	2	1	2	1	3	1	0
HOM002355	2	2	2	2	2	4	2	6	3	2	3	3	2	2	0	2	2	5	3	2
HOM002382	3	1	1	1	1	4	2	6	2	8	2	2	2	1	3	1	1	4	2	1
HOM002384	2	2	3	1	0	2	9	0	2	11	6	1	2	1	1	2	3	0	4	1
HOM002387	2	1	1	1	3	4	1	13	2	0	1	4	3	0	1	1	3	5	1	0
HOM002394	3	3	1	2	2	4	4	6	3	2	2	4	2	1	0	2	2	2	6	4
HOM002395	3	2	1	1	6	4	1	3	3	3	1	2	1	6	1	1	1	2	2	1
HOM002396	1	1	7	2	1	4	0	2	4	1	6	2	3	6	0	1	2	6	1	0
HOM002399	1	2	2	1	5	3	5	7	1	4	1	3	2	1	0	2	4	1	2	1
HOM002412	1	1	2	1	4	2	4	4	2	1	1	1	4	1	0	1	2	3	1	0
HOM002418	4	4	2	1	2	8	3	4	4	2	1	4	2	2	1	2	2	2	6	5
HOM002420	2	2	2	3	2	5	3	6	4	1	2	3	2	2	1	3	2	2	2	1
HOM002421	6	4	1	3	2	5	3	6	4	0	2	4	2	1	1	2	2	3	6	1
HOM002431	2	2	1	1	2	2	0	6	5	3	2	4	2	0	0	2	2	2	3	1
HOM002435	3	2	2	2	2	4	0	4	2	4	2	2	2	1	5	2	2	3	3	1
HOM002438	2	2	1	4	1	3	3	8	2	4	1	2	1	0	0	2	3	2	5	2
HOM002449	4	4	0	3	3	10	1	5	6	2	0	7	3	0	0	3	1	0	6	5
HOM002452	3	3	2	2	2	4	1	4	2	2	3	4	2	3	1	2	1	2	2	1
HOM002454	3	2	2	2	2	5	1	6	3	0	3	4	2	1	0	2	2	2	2	1
HOM002458	2	1	1	1	1	2	0	8	1	1	3	1	1	1	1	6	2	2	2	1
HOM002459	3	2	0	3	3	6	4	7	6	2	0	5	3	2	0	3	3	0	2	1
HOM002468	3	2	2	2	2	6	2	3	2	1	4	4	1	2	2	2	1	2	2	1
HOM002480	2	2	1	1	6	5	3	1	2	3	1	3	1	3	2	1	2	2	2	1
HOM002483	5	4	2	1	1	3	4	4	2	4	4	2	1	3	0	1	1	5	7	5
HOM002485	1	2	2	2	1	5	2	2	1	3	2	3	1	2	2	1	1	2	3	2
HOM002493	3	4	1	2	2	4	1	3	4	5	1	4	2	1	1	2	1	3	3	1
HOM002496	2	2	1	2	3	2	2	9	4	1	2	2	2	2	1	2	2	3	3	2
HOM002499	1	1	1	1	2	5	4	1	2	6	1	2	2	0	0	1	2	4	2	1
HOM002534	2	2	2	2	2	3	2	4	2	3	2	3	2	2	1	2	1	0	2	1
HOM002542	2	2	1	2	2	3	0	9	3	1	1	3	2	2	1	4	0	3	2	1
HOM002546	1	1	3	1	1	1	1	2	1	1	3	1	1	1	9	1	2	1	1	0
HOM002551	1	1	1	1	1	2	1	4	2	0	1	4	1	1	9	1	3	1	1	0
HOM002555	2	2	1	1	2	4	3	7	2	2	1	4	2	3	0	2	4	1	3	2
HOM002560	3	2	2	1	1	2	1	3	4	2	3	3	3	6	0	1	3	2	2	1
HOM002562	3	3	3	2	1	4	3	4	4	1	2	2	2	0	0	2	2	2	2	0
HOM002564	2	1	0	2	2	4	4	18	2	3	0	5	2	0	0	2	3	0	3	2
HOM002573	3	2	2	1	1	3	3	1	1	3	3	3	3	2	1	1	1	3	3	2
HOM002584	1	1	2	1	1	6	1	3	3	1	2	2	1	1	6	1	2	2	1	0
HOM002593	3	3	1	3	1	3	2	1	3	2	1	3	1	2	0	1	3	3	3	2
HOM002602	2	1	3	1	1	3	2	4	2	1	3	2	1	3	1	1	2	5	2	1
HOM002603	1	1	1	1	2	4	3	7	1	2	1	5	2	2	0	2	2	2	1	0
HOM002604	3	2	1	2	3	4	3	6	2	4	3	1	1	3	1	1	0	1	2	0
HOM002614	2	2	2	0	1	4	1	4	2	1	1	2	3	1	1	1	1	1	2	0
HOM002621	1	1	1	3	3	6	1	7	2	3	1	4	2	2	1	2	2	2	1	0
HOM002624	3	2	3	1	1	2	1	2	2	2	6	2	1	5	1	6	1	2	2	1
HOM002625	3	3	1	2	3	2	2	13	2	0	1	2	1	1	1	2	1	2	3	0
HOM002629	3	5	1	3	1	3	2	2	3	2	2	3	4	2	1	3	3	2	4	3
HOM002630	6	5	1	2	2	4	2	3	4	3	2	3	2	1	2	3	2	1	2	1
HOM002633	2	2	2	1	1	4	2	2	2	1	2	2	1	2	2	2	1	3	3	0
HOM002639	1	1	2	1	1	2	1	4	3	1	2	1	4	2	0	1	1	2	1	0
HOM002644	2	2	0	3	1	6	1	8	7	3	0	7	3	0	0	4	1	0	2	1
HOM002652	3	3	1	1	1	4	1	12	1	3	1	2	1	1	0	1	1	1	2	1
HOM002655	2	1	1	2	1	2	1	9	1	1	2	2	1	1	1	1	1	4	3	2
HOM002657	1	1	1	1	1	2	3	12	2	3	2	2	1	1	5	1	1	2	1	0
HOM002664	4	3	1	1	1	5	3	4	2	4	1	2	1	1	2	1	2	1	1	0
HOM002670	3	3	2	1	1	4	2	4	2	3	4	2	1	4	0	1	3	3	3	0
HOM002679	2	2	2	1	1	3	7	4	2	1	3	2	1	2	0	2	1	3	2	1
HOM002682	4	3	1	2	1	4	2	2	2	1	1	3	2	2	1	2	2	3	4	3
HOM002693	1	1	2	1	6	2	0	6	1	3	1	2	1	3	1	3	2	2	2	1
HOM002695	2	2	1	2	2	6	1	3	2	6	1	4	2	1	2	2	2	4	4	2
HOM002709	4	2	1	2	1	4	3	4	4	3	1	3	2	2	0	3	2	2	2	1
HOM002718	32	15	0	0	0	0	0	0	0	0	0	0	0	0	0	0	0	0	2	1
HOM002721	2	2	2	1	1	5	3	1	2	3	2	4	1	4	1	2	1	2	3	2
HOM002723	2	1	1	2	1	4	4	1	1	2	1	8	1	4	0	2	1	2	1	0
HOM002727	10	7	2	1	1	2	1	2	1	1	2	2	1	2	2	1	1	2	7	5
HOM002742	2	1	2	1	0	1	14	0	1	5	4	1	0	1	2	3	2	0	1	0
HOM002752	2	1	2	1	6	3	3	4	2	2	2	2	1	2	3	1	2	1	2	1
HOM002755	1	2	0	0	0	0	6	1	0	1	6	3	5	2	2	1	2	4	1	0
HOM002757	3	3	2	1	2	3	1	7	0	2	2	3	2	2	1	2	1	4	3	0
HOM002758	2	2	1	1	1	5	4	3	2	0	1	2	1	0	10	1	1	2	4	3
HOM002776	2	1	3	1	4	2	0	7	2	2	1	2	2	2	1	1	2	2	1	0
HOM002792	3	3	2	5	2	3	1	4	3	1	2	4	2	1	1	2	3	1	3	1
HOM002793	4	2	1	2	2	5	4	7	2	0	1	3	2	1	1	3	2	2	4	2
HOM002796	4	3	2	1	1	1	1	2	1	1	3	2	2	3	1	2	2	4	3	2
HOM002806	2	2	3	2	1	2	1	4	2	6	2	2	1	1	1	1	2	4	5	4
HOM002809	5	2	1	1	3	2	2	10	1	1	1	2	1	1	0	1	3	3	2	1
HOM002816	2	2	2	1	2	4	2	4	2	2	1	2	1	3	0	2	2	4	2	1
HOM002817	2	2	2	3	2	4	2	2	3	3	2	4	3	3	0	2	1	3	4	2
HOM002825	2	2	2	1	4	4	4	2	2	1	2	2	1	2	0	1	2	2	2	0
HOM002830	1	1	1	2	2	4	3	8	3	2	1	4	3	2	0	2	2	1	1	0
HOM002838	1	1	3	2	1	3	3	2	7	6	1	4	2	2	0	1	1	2	1	0
HOM002841	4	2	2	1	1	4	3	3	1	2	2	2	1	2	0	1	1	3	2	1
HOM002843	2	3	1	2	1	2	3	5	1	2	1	2	2	1	1	1	1	1	5	4
HOM002848	3	3	2	1	1	4	4	6	1	1	3	1	1	1	1	1	1	3	3	2
HOM002849	1	3	1	1	1	2	3	1	3	3	1	3	3	2	2	1	1	4	2	1
HOM002856	1	1	1	1	1	2	1	9	2	1	2	2	1	1	0	1	2	3	1	0
HOM002857	2	2	1	1	1	5	2	7	1	2	2	2	1	1	0	1	2	1	2	0
HOM002862	3	2	3	3	3	2	1	1	4	1	1	2	1	1	1	0	1	3	2	1
HOM002867	2	2	2	2	3	2	0	2	3	1	2	4	2	2	1	3	5	3	3	2
HOM002878	2	2	1	4	2	7	0	4	2	0	1	3	2	1	1	2	6	1	3	1
HOM002887	2	2	1	1	2	10	2	5	2	1	1	2	1	1	0	2	1	2	1	0
HOM002892	1	1	1	3	1	4	4	4	2	1	2	4	1	1	1	1	1	1	1	0
HOM002895	2	3	2	1	0	6	1	5	3	4	2	4	2	1	0	2	3	2	1	0
HOM002898	2	1	1	1	2	2	3	3	2	3	3	3	3	2	2	2	1	1	2	0
HOM002901	1	1	2	1	1	4	2	2	2	0	3	2	1	2	0	2	1	6	2	1
HOM002916	2	2	2	2	3	2	1	5	3	0	1	5	2	2	0	2	2	2	2	1
HOM002918	1	1	2	1	1	3	1	11	2	2	2	1	1	3	1	1	2	4	1	0
HOM002927	2	2	1	1	1	4	1	2	2	5	2	2	2	0	0	2	2	2	1	0
HOM002930	4	3	1	1	2	3	2	3	2	5	1	0	3	1	1	2	1	1	1	0
HOM002933	3	2	1	3	5	3	1	5	3	3	1	2	2	1	0	1	1	0	7	6
HOM002937	1	1	1	4	1	3	2	3	1	1	1	1	2	1	6	1	1	1	1	0
HOM002942	2	1	2	1	2	4	4	2	2	3	1	4	1	1	2	1	1	2	3	2
HOM002946	3	2	1	1	1	2	4	2	1	2	1	2	2	1	8	1	2	2	1	0
HOM002947	2	2	2	2	2	4	1	5	2	1	2	2	1	1	2	2	2	4	3	1
HOM002949	2	3	1	1	1	2	1	5	3	0	4	2	1	1	0	1	1	3	1	0
HOM002950	4	3	1	1	1	4	4	2	2	3	1	2	1	0	1	1	1	2	3	2
HOM002955	1	4	0	1	0	3	3	1	0	3	3	1	1	2	1	2	3	7	4	3
HOM002973	2	1	2	1	1	3	0	6	2	0	2	2	2	2	0	1	2	6	1	0
HOM002977	2	2	1	1	1	2	1	5	2	1	1	2	1	0	1	2	2	8	2	1
HOM002983	1	1	2	2	3	2	2	1	2	1	1	7	1	1	1	4	3	5	1	0
HOM002990	2	3	1	2	1	6	2	3	2	2	1	4	3	0	0	3	3	1	2	1
HOM002993	1	1	3	2	2	4	1	3	2	2	1	2	2	2	0	2	2	3	1	0
HOM002997	3	1	1	1	1	5	2	6	1	1	1	4	1	1	1	1	2	2	1	0
HOM003008	2	2	2	1	1	4	1	4	2	1	2	1	1	4	1	1	1	1	3	2
HOM003022	1	1	3	2	1	4	2	5	3	1	3	3	2	3	0	2	2	2	1	0
HOM003027	2	2	2	1	1	4	5	2	3	1	2	2	1	2	1	1	1	5	4	3
HOM003032	1	1	2	1	1	2	2	5	1	0	2	3	2	2	3	1	1	3	1	0
HOM003033	2	2	0	2	1	5	1	4	4	4	0	3	3	0	1	3	3	0	2	1
HOM003040	1	1	1	2	2	3	0	4	3	2	1	2	2	1	2	2	1	2	2	0
HOM003042	2	2	2	1	0	2	3	2	2	1	2	4	2	2	1	1	2	3	2	1
HOM003044	2	2	3	1	1	2	4	2	2	0	2	2	1	3	0	1	1	3	3	2
HOM003058	3	6	2	1	1	7	1	2	2	1	3	3	1	1	0	3	1	1	3	1
HOM003060	4	2	2	1	1	3	4	2	1	1	3	2	1	2	0	1	1	4	3	1
HOM003067	2	2	1	2	2	4	1	2	3	2	1	4	2	1	2	1	2	5	3	1
HOM003070	2	1	1	1	1	2	1	6	2	5	2	3	1	2	1	1	1	3	3	1
HOM003075	1	3	1	2	1	2	1	12	1	1	1	2	1	1	1	1	1	2	2	1
HOM003078	2	2	4	1	2	3	2	5	1	2	1	1	1	2	1	2	1	1	2	1
HOM003080	3	3	1	1	2	2	0	8	2	0	2	1	0	1	1	1	1	2	4	0
HOM003081	2	2	1	3	1	4	3	3	5	3	1	4	2	1	0	2	2	2	2	1
HOM003092	2	2	1	2	2	4	1	3	2	2	1	2	1	0	1	2	1	1	3	0
HOM003096	1	1	1	1	2	8	2	6	3	6	0	2	2	1	1	2	2	1	2	1
HOM003097	0	1	1	2	1	3	1	3	2	10	1	1	1	1	2	1	1	0	2	1
HOM003101	2	2	1	2	1	2	4	2	2	1	1	2	1	1	0	1	5	2	2	1
HOM003109	3	1	1	3	1	2	1	7	1	0	1	6	1	1	0	1	1	3	2	1
HOM003110	1	1	1	3	3	2	1	6	4	0	1	5	2	1	0	3	2	2	1	0
HOM003114	1	1	2	1	1	2	3	4	3	1	2	2	1	1	1	1	4	2	3	2
HOM003119	1	1	2	1	1	2	1	7	2	3	3	2	1	1	1	1	1	2	2	1
HOM003120	2	2	1	2	2	3	0	4	3	0	1	4	2	1	1	2	3	1	2	1
HOM003128	1	1	2	2	1	2	1	0	2	0	4	2	3	3	1	1	2	3	1	0
HOM003129	3	2	1	0	1	0	2	1	0	4	3	0	2	3	1	2	3	6	1	0
HOM003149	3	2	1	1	1	2	2	2	1	1	3	4	1	1	1	1	1	4	2	1
HOM003150	1	4	1	3	2	2	3	4	2	1	1	2	1	1	1	1	1	1	2	1
HOM003154	3	2	1	1	1	2	2	2	3	1	1	3	2	0	1	1	1	2	4	3
HOM003157	1	1	2	1	5	2	1	4	2	1	2	3	1	2	1	2	2	4	2	1
HOM003159	1	1	1	1	2	5	1	4	1	1	1	2	1	0	1	1	2	1	2	1
HOM003162	1	1	1	2	2	4	3	5	3	1	1	3	1	1	0	1	1	1	3	1
HOM003180	2	2	0	1	3	2	1	16	3	1	1	3	1	1	0	1	1	1	3	2
HOM003181	4	2	1	1	1	2	1	3	1	1	3	1	1	2	1	1	2	2	2	1
HOM003186	5	2	1	1	3	2	2	1	1	1	2	2	1	1	5	1	1	1	2	0
HOM003199	3	2	1	1	1	2	4	4	1	1	1	3	1	1	4	1	1	1	3	2
HOM003202	2	2	2	1	1	1	3	4	1	1	1	1	1	2	1	1	1	2	2	1
HOM003209	1	1	2	1	2	2	0	3	2	3	2	3	1	2	1	1	2	5	2	1
HOM003213	4	3	1	1	1	4	1	1	1	2	1	2	1	1	0	1	1	10	2	1
HOM003215	1	1	2	1	1	2	1	5	1	1	1	2	1	2	3	1	1	4	2	1
HOM003226	1	1	1	1	1	5	1	6	2	1	2	2	1	1	1	1	1	1	2	1
HOM003262	1	1	2	1	1	2	0	4	2	4	1	3	1	1	2	1	1	2	3	1
HOM003268	3	3	1	1	1	4	3	3	1	3	1	2	1	0	1	1	1	1	4	2
HOM003277	2	2	2	1	1	3	2	3	1	1	3	2	1	0	1	1	1	3	2	0
HOM003280	2	2	1	1	1	1	2	6	1	2	1	2	2	1	0	2	1	2	4	2
HOM003297	1	1	3	2	1	2	1	3	2	2	3	4	1	2	1	1	1	1	1	0
HOM003307	2	3	1	1	1	2	1	2	1	2	1	1	2	1	8	2	1	1	3	2
HOM003308	4	2	2	1	2	2	1	3	2	1	2	1	1	2	0	1	1	3	2	1
HOM003309	1	1	1	1	1	5	2	2	2	1	1	2	1	1	0	1	1	2	2	1
HOM003310	1	2	3	2	1	4	1	2	2	2	2	2	2	3	0	2	2	5	3	2
HOM003321	1	1	1	1	4	2	1	2	2	1	2	2	1	2	4	1	1	2	3	2
HOM003339	3	2	1	1	2	6	0	5	2	1	1	1	1	2	4	1	1	1	2	1
HOM003344	3	2	2	1	1	2	4	5	3	0	2	2	1	1	1	1	1	2	3	2
HOM003347	2	2	1	1	3	2	1	9	1	0	2	2	1	1	2	1	1	2	2	1
HOM003348	2	2	1	1	1	4	4	2	2	1	1	2	1	1	1	1	1	2	6	1
HOM003349	1	1	1	1	1	3	1	9	2	0	1	2	3	2	0	1	1	2	2	1
HOM003350	3	3	2	2	1	4	0	2	4	1	2	4	2	2	0	2	1	2	2	1
HOM003357	1	1	2	1	1	3	0	5	2	3	2	1	1	1	1	1	4	2	1	0
HOM003362	3	1	2	1	1	2	2	4	1	1	2	2	1	2	0	1	1	2	2	1
HOM003381	1	1	1	1	2	2	1	2	1	4	1	2	1	1	1	4	4	3	1	0
HOM003382	2	3	1	4	2	2	1	4	3	1	1	3	1	2	0	2	3	3	2	1
HOM003393	1	1	1	1	1	3	1	7	1	4	1	2	1	0	1	1	1	1	1	0
HOM003397	2	2	1	1	1	4	0	7	2	1	1	1	1	0	1	2	1	2	3	1
HOM003402	2	2	2	2	1	2	1	5	2	0	1	2	1	1	3	1	1	2	3	2
HOM003407	3	2	1	1	1	2	1	3	2	2	2	3	2	0	0	1	1	1	2	1
HOM003415	5	5	0	1	0	9	6	0	2	2	0	3	4	0	0	1	1	0	3	2
HOM003420	1	1	1	1	1	2	5	2	2	4	1	2	1	1	0	1	1	4	2	0
HOM003432	3	3	2	1	2	2	1	5	2	1	1	2	1	0	1	1	1	2	6	5
HOM003438	1	1	1	1	0	4	1	1	3	4	1	2	1	1	1	1	2	2	2	1
HOM003451	2	2	3	1	4	2	2	2	3	1	1	2	1	2	1	1	0	1	3	2
HOM003453	4	2	1	1	1	2	3	2	1	1	1	1	1	1	1	1	1	2	3	2
HOM003468	2	2	1	1	1	2	2	2	3	3	1	2	1	1	1	1	1	2	2	1
HOM003482	2	2	2	1	1	3	0	3	1	1	2	2	2	1	1	1	1	2	1	0
HOM003483	2	2	3	1	1	4	2	4	2	1	3	2	1	2	0	1	0	3	3	2
HOM003484	0	1	1	3	3	3	2	1	2	1	2	4	2	1	3	2	3	0	1	0
HOM003491	1	1	1	1	1	2	1	10	1	1	1	2	2	1	1	1	1	1	1	0
HOM003492	1	2	2	1	1	3	0	4	1	0	2	1	2	3	1	2	1	1	2	1
HOM003497	4	3	2	1	1	3	2	4	3	2	1	2	2	1	1	2	2	1	3	2
HOM003502	1	1	2	1	2	2	0	2	2	0	2	2	1	2	0	1	1	4	2	1
HOM003506	2	2	1	1	2	2	2	2	3	1	1	2	3	1	1	2	1	0	2	1
HOM003513	1	2	2	1	1	2	1	4	1	2	2	2	2	2	2	1	1	1	3	2
HOM003514	2	2	1	1	1	5	4	2	2	2	1	2	1	1	0	1	1	2	1	0
HOM003524	4	2	1	2	2	2	2	1	4	0	1	3	3	2	1	1	1	2	2	1
HOM003531	1	1	2	1	2	3	2	2	4	1	2	2	1	1	0	1	0	3	3	0
HOM003543	4	4	1	1	4	3	0	2	1	1	1	1	1	1	1	1	1	2	2	1
HOM003544	1	1	2	1	1	3	0	5	1	1	1	1	1	2	1	1	2	3	1	0
HOM003553	3	2	1	1	1	2	2	1	2	0	4	2	1	2	0	1	1	3	3	2
HOM003557	5	2	2	1	2	2	0	1	2	0	2	2	1	2	1	1	2	2	3	1
HOM003567	1	1	1	2	1	2	2	5	2	0	1	4	1	1	0	3	5	3	1	0
HOM003568	1	1	1	0	1	4	3	7	1	1	1	3	1	0	1	1	1	2	1	0
HOM003570	1	1	1	1	1	2	1	6	2	2	1	2	1	1	2	1	1	1	1	0
HOM003571	5	2	2	1	1	2	0	5	1	1	2	2	1	2	1	1	2	2	2	1
HOM003572	1	1	1	1	1	3	3	5	2	1	1	2	1	2	2	1	1	2	2	1
HOM003578	1	1	1	1	2	2	0	9	1	0	1	2	1	3	1	1	1	1	1	0
HOM003579	1	1	1	1	1	2	2	4	1	1	2	2	1	1	2	1	1	1	1	0
HOM003583	2	2	0	2	3	6	1	7	4	2	0	2	2	0	0	2	2	0	2	1
HOM003588	2	2	1	1	1	5	1	4	2	1	2	2	1	2	1	1	1	1	2	1
HOM003589	2	2	1	3	1	3	0	3	1	1	1	3	1	1	0	2	2	3	1	0
HOM003599	3	3	0	2	2	6	2	5	3	3	0	3	2	0	0	2	1	0	3	2
HOM003607	0	1	1	1	1	2	1	4	2	1	3	2	1	2	0	1	1	4	1	0
HOM003613	1	1	1	1	2	3	0	3	1	2	1	2	1	1	1	1	2	4	1	0
HOM003616	1	1	2	1	2	4	1	3	1	4	3	1	1	3	0	4	1	1	2	1
HOM003618	1	1	1	3	1	2	5	2	2	2	1	2	1	1	2	1	1	2	3	2
HOM003622	1	1	1	1	1	2	4	3	2	3	1	3	1	1	1	1	2	1	1	0
HOM003627	1	1	1	1	2	3	1	3	1	1	3	1	2	0	2	1	2	2	2	1
HOM003630	3	2	0	1	1	2	1	5	2	1	1	2	2	1	1	1	1	2	2	1
HOM003641	1	1	2	1	0	4	2	2	3	0	1	2	2	2	1	3	2	1	1	0
HOM003644	1	1	2	1	1	2	1	2	3	1	2	2	2	2	1	2	2	2	2	1
HOM003647	1	1	1	1	2	1	0	1	2	0	1	1	2	1	1	1	3	2	2	1
HOM003653	2	2	2	1	2	2	1	3	1	1	2	1	1	2	1	1	2	2	2	0
HOM003663	2	2	1	1	2	2	1	2	2	1	1	2	1	2	1	1	1	2	2	1
HOM003666	2	2	1	1	1	3	1	4	2	1	1	1	2	1	1	1	1	1	4	2
HOM003674	1	1	1	1	0	3	2	3	2	0	1	2	1	1	2	1	1	4	1	0
HOM003684	2	1	2	1	3	3	0	4	2	1	0	2	1	2	2	1	1	1	4	1
HOM003687	3	2	2	1	2	2	2	0	2	0	2	1	1	1	0	1	1	3	4	2
HOM003690	2	2	1	1	1	2	2	6	2	3	1	2	1	1	0	2	1	2	4	3
HOM003698	2	2	2	1	2	2	1	1	1	3	2	1	2	1	0	1	1	2	2	1
HOM003706	1	2	1	1	2	2	2	3	1	0	1	2	1	2	1	3	3	3	3	1
HOM003713	2	1	1	1	0	2	2	8	1	1	1	2	1	1	2	1	1	2	1	0
HOM003715	1	1	1	1	1	2	4	4	2	1	1	2	4	1	0	1	1	1	1	0
HOM003717	1	1	1	1	1	3	1	11	1	1	1	1	1	1	0	1	1	1	2	1
HOM003720	1	1	1	4	1	2	3	4	1	2	1	2	1	1	1	1	1	3	2	1
HOM003730	7	7	0	2	1	4	2	3	3	1	0	2	2	0	0	1	1	0	7	6
HOM003731	1	1	1	4	1	2	2	1	1	0	1	1	2	1	0	8	1	1	2	1
HOM003734	4	2	1	1	1	2	1	3	2	1	1	2	1	1	1	1	2	3	3	2
HOM003737	2	2	2	3	1	2	2	2	2	2	2	2	1	2	1	1	1	2	5	4
HOM003745	6	1	1	1	1	1	1	1	3	1	1	3	1	1	1	2	1	2	2	1
HOM003747	1	1	1	1	1	2	2	2	1	1	1	9	1	1	1	1	1	1	2	0
HOM003754	3	2	1	1	2	2	3	3	1	1	1	2	1	1	2	1	1	1	4	2
HOM003758	2	2	1	1	3	2	1	3	1	1	2	2	1	2	0	1	2	2	1	0
HOM003761	3	2	1	1	1	2	3	3	2	0	1	3	1	1	0	0	1	1	2	1
HOM003766	2	2	2	1	1	4	0	4	0	2	1	2	1	2	0	1	0	10	1	0
HOM003767	2	2	1	1	2	2	0	4	1	3	1	2	1	2	0	3	1	2	2	0
HOM003769	1	1	1	1	1	2	8	5	1	1	0	1	1	1	0	1	1	2	1	0
HOM003775	2	2	2	3	1	2	2	2	1	0	3	1	1	2	1	1	1	2	5	1
HOM003789	1	1	1	2	1	2	2	3	1	1	1	1	1	1	2	2	1	2	1	0
HOM003800	1	1	1	1	1	2	3	2	4	1	1	3	1	2	0	2	1	1	1	0
HOM003802	1	1	0	1	1	8	1	10	1	2	0	2	1	0	3	2	1	0	1	0
HOM003810	1	1	1	1	1	2	5	1	2	1	1	2	1	1	0	1	1	2	2	1
HOM003819	1	1	1	1	1	2	1	5	3	1	2	2	3	1	1	2	0	1	1	0
HOM003823	1	1	1	1	1	4	0	3	2	1	2	2	1	1	0	1	0	8	2	1
HOM003825	1	1	2	1	1	1	1	1	2	2	2	1	2	1	1	2	2	1	4	2
HOM003832	3	2	1	1	1	4	0	2	2	3	1	2	1	0	1	1	1	2	2	1
HOM003841	4	2	1	1	1	3	2	2	1	1	1	3	1	1	0	1	1	1	2	1
HOM003845	2	2	1	1	3	3	2	2	1	1	1	0	2	1	1	1	1	1	2	1
HOM003854	1	1	1	1	1	2	1	3	2	0	1	3	1	1	1	1	1	1	1	0
HOM003875	2	2	1	1	1	2	1	2	3	0	1	4	1	1	0	1	1	3	2	1
HOM003882	2	2	1	1	1	4	0	2	2	1	1	3	1	1	1	1	1	3	2	1
HOM003905	2	1	1	1	1	3	1	4	1	0	2	2	3	1	1	1	1	1	1	0
HOM003918	2	3	1	2	1	5	1	3	3	1	1	3	1	2	0	3	1	1	3	2
HOM003920	1	2	1	1	1	5	2	3	2	1	1	1	1	1	0	1	1	1	2	0
HOM003946	2	2	2	1	1	3	0	2	0	1	2	2	1	2	0	1	1	2	2	1
HOM003949	1	1	2	1	1	2	0	2	2	1	2	1	1	3	1	1	1	2	3	2
HOM003957	1	1	1	1	1	2	0	7	1	1	1	2	1	0	0	1	2	3	1	0
HOM003958	2	2	2	1	1	2	0	1	2	0	2	3	1	2	2	1	1	4	2	1
HOM003962	2	2	1	1	0	2	1	2	2	1	1	2	1	1	2	2	1	3	2	0
HOM003966	1	5	1	1	1	3	3	3	1	0	1	1	1	1	1	1	1	1	1	0
HOM003968	1	1	2	1	1	2	0	4	2	1	1	2	2	1	0	1	2	1	1	0
HOM003969	1	1	1	1	1	3	2	3	2	0	2	1	1	2	0	1	1	7	1	0
HOM003981	1	1	1	3	1	2	2	2	1	1	1	1	1	1	2	1	1	3	4	3
HOM004002	1	1	1	1	1	2	1	6	1	1	1	2	2	1	1	1	1	1	1	0
HOM004010	1	1	1	1	1	4	2	2	2	2	3	2	1	2	0	2	2	2	2	1
HOM004018	1	1	1	1	1	2	1	6	1	1	1	0	1	1	2	1	1	4	1	0
HOM004024	1	1	1	1	1	2	2	4	1	1	1	2	1	1	1	1	1	1	1	0
HOM004025	2	2	2	1	1	2	2	2	2	1	2	2	1	2	0	1	1	4	3	2
HOM004029	2	2	1	2	1	2	1	4	2	1	1	2	1	4	0	1	1	2	3	1
HOM004044	2	2	1	2	0	3	1	3	2	1	1	2	1	0	1	1	1	2	3	2
HOM004051	1	1	2	1	1	2	2	3	1	1	0	2	1	2	2	1	1	2	3	1
HOM004057	2	2	1	1	1	2	1	5	2	1	1	1	1	1	0	1	1	1	2	1
HOM004062	2	2	2	1	1	2	1	2	2	1	2	3	1	2	1	1	1	2	2	1
HOM004068	2	2	1	1	1	2	1	5	1	1	1	3	1	1	1	1	1	1	4	3
HOM004077	2	1	1	1	1	2	1	3	2	1	1	2	1	1	0	1	1	1	2	1
HOM004080	1	1	2	0	1	2	2	2	2	1	2	2	0	2	0	1	2	3	1	0
HOM004084	1	1	2	1	1	2	3	0	1	2	2	1	1	3	1	1	1	1	1	0
HOM004095	2	3	0	2	2	6	1	2	4	3	0	4	2	0	0	2	1	0	3	2
HOM004102	1	1	1	1	1	3	3	3	1	1	1	3	1	1	1	1	2	1	3	2
HOM004125	1	1	1	2	2	2	0	4	1	0	1	1	1	1	1	2	2	1	1	0
HOM004126	2	2	1	2	2	3	2	2	3	1	1	3	2	1	0	2	2	1	1	0
HOM004136	1	1	1	0	1	2	5	7	2	0	1	2	1	1	1	1	1	2	2	1
HOM004138	1	1	0	0	0	2	2	4	0	2	2	2	3	2	1	2	2	2	4	2
HOM004148	1	1	1	1	1	3	0	3	2	1	1	1	1	1	1	1	1	3	2	1
HOM004162	3	2	2	1	2	1	2	1	1	2	1	1	1	1	1	2	1	2	2	0
HOM004164	1	1	1	1	1	2	0	8	1	1	1	2	1	0	1	1	1	1	1	0
HOM004165	2	1	1	1	4	2	0	2	1	0	1	2	1	1	1	1	1	1	1	0
HOM004171	4	2	1	1	1	2	1	7	2	0	1	2	1	1	1	1	1	1	2	1
HOM004173	1	1	0	1	2	7	1	4	3	3	0	4	2	0	0	2	2	0	2	1
HOM004185	1	1	1	1	3	5	1	3	2	0	1	4	1	1	0	2	2	1	1	0
HOM004196	2	2	1	1	1	2	1	5	1	1	1	4	1	1	1	1	1	1	2	1
HOM004200	3	3	1	3	1	0	0	1	1	0	2	2	1	1	1	1	2	1	3	1
HOM004202	2	2	2	1	1	2	1	5	2	1	2	1	1	1	0	1	1	3	5	0
HOM004219	2	4	0	3	1	4	3	3	5	0	0	3	2	0	0	2	1	0	3	1
HOM004222	1	1	1	2	1	2	3	3	2	1	1	1	1	1	1	1	1	1	1	0
HOM004232	5	2	1	2	1	2	1	4	1	1	2	3	1	1	1	1	1	1	1	0
HOM004235	2	2	1	1	1	3	1	4	2	1	1	2	1	1	1	1	1	1	2	1
HOM004254	2	1	1	1	1	4	3	3	2	3	1	1	1	1	1	1	1	1	1	0
HOM004266	1	1	1	0	1	2	1	3	1	1	1	2	1	3	0	2	1	3	1	0
HOM004268	1	1	2	1	1	2	1	1	2	1	4	2	0	1	1	1	2	2	1	0
HOM004284	1	1	2	1	0	2	1	2	1	4	2	2	1	2	0	2	1	1	1	0
HOM004286	2	2	1	1	2	2	0	0	3	2	2	3	1	1	0	1	1	1	2	1
HOM004289	1	2	1	1	1	2	1	1	1	1	1	2	1	1	7	1	1	1	1	0
HOM004298	1	1	1	1	2	2	2	2	3	0	1	2	2	1	1	1	1	1	2	1
HOM004299	2	3	1	1	1	2	1	5	1	1	1	1	2	3	0	2	1	2	4	3
HOM004300	2	2	1	1	4	2	0	0	1	0	1	1	1	1	4	1	1	1	2	1
HOM004304	2	2	1	1	1	2	3	1	2	1	1	2	1	1	1	2	1	1	2	1
HOM004317	2	1	1	1	2	1	5	4	1	1	1	1	3	1	0	1	1	1	1	0
HOM004345	1	1	1	1	2	2	1	2	1	0	1	3	1	1	0	1	1	2	1	0
HOM004351	2	2	1	1	1	2	3	1	1	0	1	1	1	1	2	1	1	1	3	2
HOM004359	1	1	2	1	1	2	0	2	1	3	1	1	1	1	1	1	1	1	1	0
HOM004372	2	2	1	1	1	3	1	3	2	1	1	2	1	1	1	1	1	2	3	2
HOM004381	4	2	1	1	2	2	0	2	1	3	1	2	1	1	1	1	1	2	2	1
HOM004382	1	1	1	2	1	1	2	5	1	1	1	1	1	1	1	2	1	1	2	0
HOM004386	2	3	2	1	1	2	1	3	1	2	1	0	1	2	1	2	1	1	3	2
HOM004397	1	1	2	4	1	2	1	2	1	1	1	1	1	1	1	1	1	1	2	1
HOM004419	1	1	1	2	1	4	1	2	2	0	1	2	1	1	1	1	1	1	1	0
HOM004425	1	3	1	0	2	2	2	0	1	1	1	2	2	2	1	1	1	2	2	0
HOM004435	1	1	1	1	1	2	1	3	1	1	1	2	1	1	2	1	0	1	1	0
HOM004442	1	1	1	1	1	2	1	3	2	1	1	1	2	1	3	1	1	1	1	0
HOM004453	1	1	1	3	1	4	2	2	3	2	1	2	1	1	0	1	1	2	3	2
HOM004454	1	1	1	1	1	2	1	3	1	1	1	2	1	1	2	1	1	1	1	0
HOM004457	1	2	2	1	1	2	1	2	2	0	2	2	1	2	1	1	0	3	2	0
HOM004482	1	1	1	2	1	2	2	2	2	1	1	3	1	0	0	1	1	1	2	1
HOM004485	1	1	1	1	1	2	1	3	2	0	1	3	1	0	0	3	2	4	1	0
HOM004501	1	1	1	1	1	1	0	2	1	1	1	2	1	1	2	1	0	1	1	0
HOM004504	1	1	1	1	1	2	2	2	1	2	1	2	1	1	0	2	1	3	1	0
HOM004521	3	2	1	1	1	2	1	4	1	1	1	2	1	1	0	1	1	2	6	5
HOM004531	1	1	1	1	1	2	0	6	2	1	1	2	1	1	0	1	1	3	1	0
HOM004535	2	2	1	1	2	2	0	3	2	1	1	2	1	1	0	1	1	2	2	1
HOM004565	2	1	1	1	1	2	1	4	1	1	1	2	2	1	1	1	1	1	2	1
HOM004572	1	1	1	1	1	4	2	4	2	1	1	2	2	1	0	1	0	2	1	0
HOM004577	2	2	1	1	1	2	1	4	2	1	1	2	1	1	1	1	1	2	2	1
HOM004582	1	1	1	1	1	3	2	2	2	1	2	1	1	1	0	1	1	1	1	0
HOM004597	1	1	1	1	1	2	1	3	2	5	1	1	1	1	1	2	2	1	2	1
HOM004604	2	2	1	1	1	2	1	3	1	0	1	3	1	1	0	1	1	2	2	1
HOM004610	1	1	1	3	1	2	1	3	2	1	1	2	1	1	0	1	1	1	1	0
HOM004613	1	1	1	1	1	2	3	2	1	2	1	3	2	1	1	1	1	3	1	0
HOM004624	3	1	1	2	1	2	3	2	1	1	1	1	3	1	0	1	2	2	2	1
HOM004633	1	1	1	1	1	4	1	2	2	1	1	1	1	1	1	1	1	2	1	0
HOM004637	1	1	1	1	1	2	2	3	1	1	1	2	1	1	1	0	1	2	2	0
HOM004649	1	1	1	1	1	3	0	3	1	2	1	1	1	1	1	1	1	1	1	0
HOM004656	1	1	1	1	1	4	0	3	2	1	1	2	1	1	1	2	2	3	1	0
HOM004662	1	1	1	1	2	2	1	3	2	2	1	4	1	1	1	1	2	1	2	1
HOM004680	1	2	0	1	2	5	1	4	3	1	0	3	2	0	0	3	2	0	2	1
HOM004688	1	1	1	1	1	2	3	1	1	1	1	1	2	1	1	1	1	2	2	1
HOM004704	2	2	0	1	2	3	2	3	4	3	0	2	2	0	0	2	2	0	4	2
HOM004706	1	1	1	1	1	2	0	5	1	1	2	2	1	1	1	1	1	2	1	0
HOM004708	1	1	1	1	1	1	4	4	2	1	2	1	2	3	0	1	1	1	1	0
HOM004710	1	1	1	1	1	2	3	2	2	1	1	2	1	0	0	1	1	2	1	0
HOM004732	1	1	1	0	2	2	0	4	1	1	1	2	1	1	1	2	1	1	1	0
HOM004757	1	1	1	2	1	2	1	2	2	0	1	2	1	1	2	2	1	1	1	0
HOM004758	1	1	1	1	1	1	0	3	1	3	1	1	1	1	1	1	1	2	2	1
HOM004767	1	1	1	1	1	2	1	4	1	1	1	2	1	1	1	1	1	2	1	0
HOM004776	1	1	1	1	1	4	0	1	1	1	1	1	1	1	1	1	1	2	1	0
HOM004806	1	1	1	1	1	1	3	2	1	2	1	1	1	1	1	1	2	1	4	3
HOM004822	1	1	1	1	1	4	1	2	2	0	1	1	1	1	0	1	1	2	1	0
HOM004825	1	1	1	0	1	2	1	1	2	0	1	2	2	1	4	1	1	1	2	1
HOM004834	1	1	1	2	1	1	1	2	2	2	1	2	1	1	1	1	1	2	1	0
HOM004841	2	2	1	1	1	2	1	3	2	2	1	2	1	1	0	1	1	4	2	1
HOM004845	1	1	1	1	1	1	1	3	1	0	1	1	1	2	1	1	1	2	1	0
HOM004871	1	1	1	1	0	2	0	4	1	2	1	1	1	1	1	1	1	2	1	0
HOM004880	1	1	1	1	3	1	1	1	1	1	1	1	1	1	1	1	1	1	1	0
HOM004912	2	2	1	1	1	2	0	3	1	2	0	1	2	1	1	1	1	1	4	3
HOM004922	1	1	2	1	1	4	1	2	2	1	3	2	1	2	0	1	1	1	2	0
HOM004938	2	2	1	1	1	2	0	2	1	0	1	3	1	1	0	1	1	2	4	2
HOM004944	1	1	1	1	1	2	1	3	1	1	1	1	1	1	1	1	1	1	1	0
HOM004946	1	1	2	1	1	2	0	2	2	1	2	1	1	2	1	1	1	2	1	0
HOM004949	1	1	1	1	1	2	1	2	1	2	1	1	2	2	0	1	1	2	1	0
HOM004952	0	1	2	1	2	2	1	1	1	9	2	0	1	1	0	1	0	2	2	1
HOM004976	1	1	1	1	1	2	1	2	1	1	1	2	1	1	1	1	1	2	1	0
HOM004979	1	1	1	1	0	3	1	3	1	0	1	2	1	0	1	1	1	3	1	0
HOM004982	1	1	1	1	1	3	6	2	1	1	1	2	1	1	2	1	1	1	1	0
HOM004988	1	1	0	2	1	5	2	1	3	5	0	3	2	0	0	2	1	0	1	0
HOM004989	0	3	0	0	0	3	3	1	0	1	3	1	1	1	1	2	2	1	3	2
HOM005008	2	2	1	1	1	4	2	3	2	2	2	2	1	1	0	1	0	1	2	1
HOM005011	4	1	1	1	1	3	1	0	1	1	1	1	1	2	0	1	0	1	2	0
HOM005014	1	1	1	1	2	3	2	4	2	1	1	1	1	1	0	1	1	3	2	0
HOM005025	2	1	1	1	1	2	0	2	2	0	1	1	1	1	1	1	1	2	1	0
HOM005052	1	1	2	1	1	2	2	1	1	0	2	1	1	4	1	1	1	3	2	1
HOM005058	1	1	1	1	1	2	2	1	1	1	2	2	3	0	0	1	1	1	2	1
HOM005074	1	2	1	1	1	1	0	5	1	1	1	1	1	3	1	1	1	3	2	1
HOM005075	1	1	1	1	1	2	1	2	2	1	1	2	2	1	0	1	1	2	2	1
HOM005081	1	2	1	1	1	2	2	1	1	2	0	1	1	1	2	1	1	1	2	1
HOM005099	1	1	1	1	1	1	1	3	1	1	1	1	1	0	2	1	1	1	1	0
HOM005113	1	1	1	1	1	2	1	4	2	0	1	2	1	2	0	1	1	4	2	1
HOM005123	1	1	1	1	1	1	0	2	2	1	1	1	1	4	0	1	1	2	1	0
HOM005139	1	1	2	1	1	2	1	3	2	0	2	1	2	2	1	1	1	2	3	1
HOM005147	1	1	1	1	1	4	2	2	1	0	1	2	1	2	0	1	1	2	2	1
HOM005173	1	1	1	1	2	2	0	0	1	1	1	1	1	3	2	1	1	1	2	1
HOM005180	1	1	1	2	1	2	5	1	2	1	1	1	1	1	1	1	1	3	1	0
HOM005189	1	1	1	1	1	2	1	2	2	0	1	2	1	1	1	1	1	1	1	0
HOM005194	1	2	1	1	1	3	1	2	2	1	1	2	1	1	1	1	1	2	3	2
HOM005195	1	1	1	1	1	2	0	1	2	2	1	2	1	1	1	1	1	1	1	0
HOM005230	1	1	1	1	1	1	1	1	2	1	1	1	2	1	1	1	3	1	1	0
HOM005236	1	1	1	1	1	1	1	2	2	1	1	1	1	1	1	1	1	1	1	0
HOM005237	1	1	1	2	1	2	2	3	1	0	1	2	0	1	0	1	2	0	2	1
HOM005241	2	2	1	1	1	2	0	1	2	2	2	3	1	0	0	1	1	1	4	1
HOM005251	2	2	1	1	1	4	1	2	1	0	2	2	1	1	1	1	1	2	3	2
HOM005255	1	1	1	2	1	2	1	7	1	1	1	1	1	1	0	1	1	1	3	2
HOM005279	1	1	1	1	1	3	0	3	1	1	1	2	1	1	0	1	1	5	1	0
HOM005280	1	1	1	1	1	3	1	4	1	0	1	2	1	0	0	1	1	1	1	0
HOM005307	1	2	1	1	1	2	1	1	1	1	1	1	1	1	0	5	1	1	6	5
HOM005313	1	1	1	2	1	4	0	1	1	1	1	1	1	1	0	1	1	2	2	1
HOM005318	1	1	0	1	1	2	0	2	1	0	1	1	1	1	2	1	1	1	1	0
HOM005320	4	3	0	1	1	2	1	2	2	6	0	2	1	0	0	1	1	0	3	0
HOM005330	1	1	1	1	1	2	1	3	1	1	1	2	1	1	1	1	1	2	2	1
HOM005334	1	1	1	1	1	2	1	0	1	1	1	1	1	1	0	1	2	4	1	0
HOM005340	1	1	1	1	1	2	1	6	2	0	1	1	1	1	1	1	1	1	1	0
HOM005343	1	1	1	1	1	1	1	5	1	1	1	1	1	0	3	1	1	1	4	3
HOM005363	1	1	1	1	2	2	1	2	1	1	1	2	1	1	0	1	1	1	1	0
HOM005375	1	2	1	1	1	2	1	1	1	0	1	1	2	3	1	1	1	1	1	0
HOM005400	1	1	1	2	2	2	3	2	1	0	1	2	1	0	0	2	1	1	2	1
HOM005415	3	2	1	1	1	2	1	3	1	1	2	1	1	1	0	1	0	1	2	0
HOM005442	1	1	1	1	1	2	1	4	2	1	1	2	1	1	0	1	1	1	1	0
HOM005443	2	2	1	1	1	3	1	3	2	0	1	2	1	1	0	1	1	3	2	1
HOM005468	1	1	1	0	1	2	1	2	2	3	1	2	1	1	1	1	1	2	1	0
HOM005470	1	1	1	1	1	1	1	1	1	1	1	2	1	1	2	1	1	1	2	1
HOM005471	1	1	1	1	1	2	1	1	1	2	1	1	2	2	0	1	1	1	2	1
HOM005486	1	1	1	0	1	2	2	2	2	2	1	2	1	1	1	1	1	1	2	1
HOM005493	1	1	1	2	1	2	1	2	1	1	1	1	1	0	1	1	1	1	1	0
HOM005565	1	1	1	1	2	2	0	0	1	0	1	1	1	1	1	1	1	7	1	0
HOM005595	1	1	1	1	1	3	3	2	1	2	1	2	1	1	1	1	1	1	1	0
HOM005600	1	1	1	1	1	1	1	1	1	1	1	2	1	1	3	1	1	1	2	1
HOM005608	2	1	1	1	1	2	1	1	1	0	2	1	1	1	1	1	1	1	1	0
HOM005620	1	1	1	1	1	1	1	1	2	1	1	2	1	2	0	1	1	1	1	0
HOM005622	1	1	1	1	1	1	1	2	1	2	1	0	1	1	2	1	0	1	1	0
HOM005630	2	2	1	1	1	2	0	0	1	2	1	2	1	1	1	1	1	2	2	0
HOM005643	1	1	1	0	1	2	1	4	1	1	1	1	1	1	1	1	1	1	1	0
HOM005665	1	1	1	1	1	2	3	1	1	1	1	2	1	1	0	1	1	2	2	1
HOM005708	1	1	1	1	1	2	1	5	1	1	2	1	1	1	0	1	1	1	1	0
HOM005713	1	1	1	2	1	2	0	3	2	1	2	1	1	2	0	0	0	1	1	0
HOM005722	1	1	1	2	1	3	1	3	1	0	1	2	2	1	0	1	1	2	1	0
HOM005741	1	1	1	1	1	2	1	2	1	2	1	3	1	1	1	1	1	1	2	1
HOM005762	1	1	1	1	0	2	1	0	2	1	1	1	4	0	1	1	1	1	1	0
HOM005764	1	1	1	1	1	2	2	1	1	1	1	2	1	1	1	1	1	1	1	0
HOM005782	2	2	0	2	1	2	2	1	3	1	0	3	2	0	0	2	2	0	2	1
HOM005796	1	1	2	1	1	3	1	2	1	0	2	1	2	1	1	1	1	2	2	1
HOM005806	2	1	1	0	1	2	1	1	1	0	2	1	1	1	0	1	1	2	1	0
HOM005825	1	1	1	2	1	2	0	2	1	0	1	2	1	1	0	1	1	1	1	0
HOM005831	1	2	1	0	1	1	1	1	2	2	1	1	1	2	0	1	2	1	2	1
HOM005847	1	1	1	1	1	2	1	3	1	0	1	1	1	1	1	1	1	1	1	0
HOM005852	1	1	1	1	1	2	1	1	1	3	1	1	1	0	1	1	1	1	3	2
HOM005856	9	7	0	0	0	1	0	0	1	0	0	1	1	0	0	4	0	0	2	1
HOM005857	1	1	1	1	1	2	1	1	1	2	1	1	1	1	1	1	1	1	1	0
HOM005863	1	1	1	2	1	2	3	0	1	1	1	4	1	1	0	1	1	1	2	1
HOM005878	1	1	1	1	1	2	1	1	1	1	1	3	2	0	0	2	2	2	2	0
HOM005880	1	1	1	1	2	2	1	4	1	1	1	2	1	1	1	1	1	1	2	1
HOM005906	1	1	1	1	1	2	0	2	2	0	1	1	2	1	1	1	1	1	1	0
HOM005915	1	3	0	1	5	2	1	3	1	2	0	1	1	0	0	1	1	0	3	2
HOM005918	1	1	1	1	1	2	0	6	1	1	2	1	1	1	0	1	1	1	1	0
HOM005920	0	2	1	0	2	3	4	1	0	1	2	0	1	0	0	2	1	1	1	0
HOM005936	1	1	1	1	1	1	1	2	1	1	1	1	1	0	1	1	1	1	2	1
HOM005944	1	1	1	1	2	2	1	3	2	0	1	1	1	1	0	1	1	1	2	1
HOM005948	1	1	2	1	1	1	1	1	1	1	2	2	1	2	0	1	1	1	1	0
HOM005991	1	2	0	1	2	3	2	4	2	1	0	1	1	0	0	1	1	0	5	4
HOM006016	1	1	1	1	1	4	0	0	1	1	1	2	1	1	1	1	1	1	1	0
HOM006017	1	1	1	1	1	2	1	2	1	1	1	1	1	1	1	1	1	1	1	0
HOM006021	1	1	1	1	1	1	1	2	1	0	2	1	1	1	1	1	1	1	3	1
HOM006024	1	1	1	1	1	1	1	2	1	0	1	2	1	1	0	1	0	1	1	0
HOM006044	1	1	1	1	1	1	1	3	1	1	1	4	1	0	0	1	1	1	1	0
HOM006046	1	1	2	1	1	2	1	2	2	1	1	2	1	1	0	1	1	1	1	0
HOM006049	1	1	1	1	1	2	1	1	1	0	1	1	1	0	1	1	1	2	1	0
HOM006059	0	2	1	1	1	2	1	5	1	1	0	2	1	1	0	1	1	2	3	1
HOM006089	1	1	0	0	1	4	1	6	1	3	0	1	1	0	0	2	1	0	1	0
HOM006090	1	1	1	1	1	2	2	2	1	1	2	1	1	0	1	1	1	1	1	0
HOM006094	1	1	1	1	1	1	0	2	2	0	1	2	1	0	1	1	1	3	1	0
HOM006098	1	1	1	1	2	2	0	4	1	0	1	2	1	1	0	1	1	1	1	0
HOM006115	1	1	1	1	2	0	1	2	2	0	2	2	1	1	0	1	1	2	1	0
HOM006136	0	2	0	0	0	1	4	4	0	2	1	1	1	1	0	1	2	1	3	2
HOM006137	2	2	0	2	0	2	1	2	3	0	0	2	2	0	1	2	2	0	3	2
HOM006151	3	4	1	0	1	4	0	0	1	1	1	1	1	1	0	1	0	2	3	2
HOM006158	1	1	1	0	2	1	1	2	1	1	1	2	1	0	1	1	1	2	1	0
HOM006198	1	1	1	1	1	1	1	3	1	1	1	2	1	1	1	1	1	1	2	1
HOM006201	1	1	1	1	1	1	1	2	1	0	1	2	1	1	1	1	1	2	1	0
HOM006213	2	1	1	1	0	4	1	1	1	2	1	1	1	1	0	1	1	1	1	0
HOM006217	0	1	1	1	1	2	1	1	1	1	1	1	1	0	1	1	1	1	1	0
HOM006229	1	1	1	1	1	2	1	1	1	1	1	2	1	1	1	1	1	2	2	0
HOM006274	19	3	0	0	0	0	0	0	0	0	0	0	0	0	0	0	0	0	5	4
HOM006287	2	1	0	1	1	2	1	2	1	2	0	3	1	0	0	1	1	0	2	1
HOM006334	1	1	1	1	0	2	2	0	1	3	1	1	1	1	0	1	2	1	1	0
HOM006340	1	1	0	1	1	5	2	3	2	2	0	2	1	0	0	1	0	0	1	0
HOM006351	1	1	1	1	1	1	1	1	1	2	1	1	1	1	0	1	1	2	1	0
HOM006356	1	1	1	1	1	2	1	0	1	1	1	1	1	1	0	1	1	4	1	0
HOM006357	1	1	1	1	1	2	0	3	1	1	1	1	0	1	1	1	1	1	1	0
HOM006362	1	1	1	1	1	2	0	1	1	1	1	1	1	1	1	1	1	2	1	0
HOM006369	2	2	0	1	1	4	1	3	2	2	0	2	1	0	0	1	0	0	3	1
HOM006417	2	2	1	1	1	2	0	0	1	0	1	2	1	1	0	1	1	2	7	3
HOM006424	1	1	1	1	1	3	1	1	1	1	1	1	1	1	0	1	1	1	4	2
HOM006425	1	1	1	1	1	2	1	3	1	1	1	1	1	1	0	1	1	1	2	1
HOM006426	1	1	1	1	1	2	0	1	1	0	1	1	1	1	0	1	1	1	2	1
HOM006465	2	2	1	1	1	2	1	2	1	0	1	1	1	0	1	1	1	1	2	1
HOM006466	1	1	1	1	1	1	1	2	1	0	1	1	1	1	1	2	1	1	1	0
HOM006570	1	1	0	1	2	2	1	2	1	0	1	1	2	0	0	1	1	1	2	1
HOM006614	1	1	1	1	1	3	0	1	2	1	0	1	1	1	1	1	1	1	1	0
HOM006632	1	1	0	1	1	4	1	2	2	2	0	2	1	0	0	1	1	0	1	0
HOM006636	1	1	1	0	1	2	0	0	1	1	1	2	1	1	1	1	1	1	3	2
HOM006649	1	1	1	1	1	1	1	1	1	0	1	1	1	1	0	1	1	2	1	0
HOM006653	1	1	1	1	1	2	1	2	1	0	1	1	1	1	0	1	1	1	2	1
HOM006662	1	1	1	1	1	2	0	2	1	1	0	0	1	0	1	1	1	1	1	0
HOM006680	1	1	1	1	1	2	0	4	1	0	1	1	1	1	0	1	1	1	1	0
HOM006727	1	1	1	0	1	1	1	2	2	1	0	1	1	1	0	1	1	2	1	0
HOM006728	3	1	0	1	1	4	1	1	1	1	0	2	1	0	0	1	1	0	2	1
HOM006729	1	1	1	0	1	1	1	2	1	1	1	1	1	1	0	1	0	1	1	0
HOM006737	2	2	0	1	1	4	1	2	2	1	0	1	1	0	0	1	0	0	2	1
HOM006742	1	1	0	1	1	2	0	3	1	1	0	3	1	0	1	1	1	0	1	0
HOM006750	1	1	1	1	0	0	0	2	1	0	1	1	1	1	0	1	0	3	2	1
HOM006775	2	2	0	1	1	4	0	2	1	0	0	3	1	0	0	1	1	0	4	3
HOM006796	1	1	1	1	1	1	1	0	1	1	1	1	1	1	1	1	1	1	1	0
HOM006801	1	1	1	1	1	2	1	2	1	0	1	1	1	1	0	1	1	1	3	2
HOM006899	1	1	1	1	1	2	0	1	1	0	1	1	1	0	1	1	1	1	2	1
HOM006904	2	2	0	2	0	1	1	2	2	0	0	1	1	0	0	4	0	0	1	0
HOM006957	1	1	1	1	0	2	0	1	0	0	1	1	1	1	1	1	1	1	2	1
HOM007005	2	2	0	1	1	2	0	4	0	0	0	2	1	0	0	1	1	0	3	2
HOM007062	2	2	0	1	1	2	1	2	2	0	0	2	1	0	0	1	0	0	1	0
HOM007089	1	1	0	1	2	2	1	2	1	0	0	2	1	0	0	1	1	0	3	1
HOM007102	1	1	0	1	1	5	0	1	1	1	0	2	1	0	0	1	0	0	2	1
HOM007239	2	2	0	2	0	2	0	0	2	1	0	2	1	0	0	1	0	0	3	0
HOM007324	1	1	0	1	1	2	0	2	2	0	0	1	1	0	0	1	1	0	2	1
HOM007341	2	1	0	1	1	2	0	1	1	2	0	1	1	0	0	1	1	0	1	0
HOM007351	1	2	0	0	1	2	1	1	0	1	0	2	0	0	0	1	1	0	1	0
HOM007405	8	6	0	0	0	0	0	0	0	0	0	0	0	0	0	0	0	0	5	4
HOM007547	1	1	1	1	0	2	0	1	1	1	0	2	1	0	0	0	1	0	1	0
HOM007614	1	1	0	1	1	2	0	0	2	1	0	2	1	0	0	1	0	0	1	0
HOM007641	7	6	0	0	0	0	0	0	0	0	0	0	0	0	0	0	0	0	5	3
HOM007773	1	1	0	1	0	2	0	0	1	1	0	1	1	0	0	1	1	0	1	0
HOM007791	3	2	0	0	0	0	0	2	1	1	0	2	1	0	0	0	0	0	2	0
HOM007831	11	1	0	0	0	0	0	0	0	0	0	0	0	0	0	0	0	0	1	0
HOM008012	1	1	0	1	1	2	0	1	0	1	0	2	0	0	0	0	0	0	2	1
HOM009041	1	1	0	1	1	0	0	2	0	1	0	0	0	0	0	1	0	0	1	0
HOM009063	1	1	0	0	1	0	0	0	0	0	0	0	2	0	0	0	2	1	1	0
HOM009558	4	3	0	0	0	0	0	0	0	0	0	0	0	0	0	0	0	0	2	1
HOM009728	2	1	0	0	0	1	0	1	0	1	0	1	0	0	0	0	0	0	1	0
HOM009731	3	4	0	0	0	0	0	0	0	0	0	0	0	0	0	0	0	0	4	2
HOM010288	2	2	0	1	1	0	0	0	0	0	0	0	0	0	0	0	0	0	2	1
HOM011135	1	1	0	0	0	0	0	0	1	0	0	1	1	0	0	0	0	0	2	1
HOM011526	3	2	0	0	0	0	0	0	0	0	0	0	0	0	0	0	0	0	1	0
HOM012133	3	2	0	0	0	0	0	0	0	0	0	0	0	0	0	0	0	0	2	1
HOM012876	3	1	0	0	0	0	0	0	0	0	0	0	0	0	0	0	0	0	6	5
HOM012989	2	2	0	0	0	0	0	0	0	0	0	0	0	0	0	0	0	0	1	0
HOM013005	0	4	0	0	0	0	0	0	0	0	0	0	0	0	0	0	0	0	1	0
HOM013035	0	3	0	0	0	0	0	0	0	0	0	0	0	0	0	1	0	0	1	0
HOM013085	2	2	0	0	0	0	0	0	0	0	0	0	0	0	0	0	0	0	1	0
HOM013342	2	2	0	0	0	0	0	0	0	0	0	0	0	0	0	0	0	0	2	0
HOM013361	1	3	0	0	0	0	0	0	0	0	0	0	0	0	0	0	0	0	2	1
HOM013365	2	2	0	0	0	0	0	0	0	0	0	0	0	0	0	0	0	0	2	1
HOM013369	2	2	0	0	0	0	0	0	0	0	0	0	0	0	0	0	0	0	3	1
HOM013731	2	2	0	0	0	0	0	0	0	0	0	0	0	0	0	0	0	0	4	2
HOM013780	1	3	0	0	0	0	0	0	0	0	0	0	0	0	0	0	0	0	1	0
HOM014133	2	2	0	0	0	0	0	0	0	0	0	0	0	0	0	0	0	0	3	0
HOM014137	2	2	0	0	0	0	0	0	0	0	0	0	0	0	0	0	0	0	1	0
HOM015166	2	1	0	0	0	0	0	0	0	0	0	0	0	0	0	0	0	0	2	1
HOM015602	2	1	0	0	0	0	0	0	0	0	0	0	0	0	0	0	0	0	2	1
HOM016239	1	1	0	1	0	0	0	0	0	0	0	0	0	0	0	0	0	0	2	1
HOM017001	2	1	0	0	0	0	0	0	0	0	0	0	0	0	0	0	0	0	1	0
HOM017303	2	1	0	0	0	0	0	0	0	0	0	0	0	0	0	0	0	0	1	0
HOM017306	0	3	0	0	0	0	0	0	0	0	0	0	0	0	0	0	0	0	1	0
HOM017773	0	3	0	0	0	0	0	0	0	0	0	0	0	0	0	0	0	0	4	1
HOM017982	2	1	0	0	0	0	0	0	0	0	0	0	0	0	0	0	0	0	1	0
HOM018520	1	2	0	0	0	0	0	0	0	0	0	0	0	0	0	0	0	0	1	0
HOM020362	1	1	0	0	0	0	0	0	0	0	0	0	0	0	0	0	0	0	1	0
HOM020596	1	1	0	0	0	0	0	0	0	0	0	0	0	0	0	0	0	0	1	0
HOM020753	1	1	0	0	0	0	0	0	0	0	0	0	0	0	0	0	0	0	1	0
HOM020773	1	1	0	0	0	0	0	0	0	0	0	0	0	0	0	0	0	0	1	0
HOM020787	1	1	0	0	0	0	0	0	0	0	0	0	0	0	0	0	0	0	1	0
HOM020798	1	1	0	0	0	0	0	0	0	0	0	0	0	0	0	0	0	0	1	0
HOM020951	1	1	0	0	0	0	0	0	0	0	0	0	0	0	0	0	0	0	1	0
HOM021872	1	1	0	0	0	0	0	0	0	0	0	0	0	0	0	0	0	0	1	0
HOM022010	1	1	0	0	0	0	0	0	0	0	0	0	0	0	0	0	0	0	3	1
HOM022116	1	1	0	0	0	0	0	0	0	0	0	0	0	0	0	0	0	0	1	0
HOM023024	1	1	0	0	0	0	0	0	0	0	0	0	0	0	0	0	0	0	1	0
HOM023765	1	1	0	0	0	0	0	0	0	0	0	0	0	0	0	0	0	0	1	0
HOM023886	1	1	0	0	0	0	0	0	0	0	0	0	0	0	0	0	0	0	4	1
HOM024647	0	2	0	0	0	0	0	0	0	0	0	0	0	0	0	0	0	0	2	0
HOM024657	1	1	0	0	0	0	0	0	0	0	0	0	0	0	0	0	0	0	1	0
HOM025294	1	1	0	0	0	0	0	0	0	0	0	0	0	0	0	0	0	0	1	0
HOM025301	1	1	0	0	0	0	0	0	0	0	0	0	0	0	0	0	0	0	1	0
HOM025425	1	1	0	0	0	0	0	0	0	0	0	0	0	0	0	0	0	0	1	0
HOM025509	1	1	0	0	0	0	0	0	0	0	0	0	0	0	0	0	0	0	1	0
HOM025988	1	1	0	0	0	0	0	0	0	0	0	0	0	0	0	0	0	0	1	0
HOM026584	1	1	0	0	0	0	0	0	0	0	0	0	0	0	0	0	0	0	3	1
HOM026588	1	1	0	0	0	0	0	0	0	0	0	0	0	0	0	0	0	0	2	0
HOM027665	1	1	0	0	0	0	0	0	0	0	0	0	0	0	0	0	0	0	2	1
HOM028001	1	1	0	0	0	0	0	0	0	0	0	0	0	0	0	0	0	0	2	1
HOM028158	1	1	0	0	0	0	0	0	0	0	0	0	0	0	0	0	0	0	1	0
HOM028603	1	1	0	0	0	0	0	0	0	0	0	0	0	0	0	0	0	0	1	0
HOM028605	0	2	0	0	0	0	0	0	0	0	0	0	0	0	0	0	0	0	1	0
HOM029430	1	1	0	0	0	0	0	0	0	0	0	0	0	0	0	0	0	0	2	1
HOM030405	1	1	0	0	0	0	0	0	0	0	0	0	0	0	0	0	0	0	1	0
HOM030978	1	1	0	0	0	0	0	0	0	0	0	0	0	0	0	0	0	0	2	0
HOM031590	1	1	0	0	0	0	0	0	0	0	0	0	0	0	0	0	0	0	1	0
HOM032240	1	1	0	0	0	0	0	0	0	0	0	0	0	0	0	0	0	0	1	0
HOM032241	1	1	0	0	0	0	0	0	0	0	0	0	0	0	0	0	0	0	2	1
HOM034292	0	1	0	0	0	0	0	0	0	0	0	0	0	0	0	0	0	0	2	1
HOM034296	0	1	0	0	0	0	0	0	0	0	0	0	0	0	0	0	0	0	2	1
HOM042390	0	1	0	0	0	0	0	0	0	0	0	0	0	0	0	0	0	0	1	0
HOM042409	0	1	0	0	0	0	0	0	0	0	0	0	0	0	0	0	0	0	1	0
HOM046586	0	1	0	0	0	0	0	0	0	0	0	0	0	0	0	0	0	0	1	0
HOM046601	0	1	0	0	0	0	0	0	0	0	0	0	0	0	0	0	0	0	1	0
HOM050695	0	1	0	0	0	0	0	0	0	0	0	0	0	0	0	0	0	0	1	0
HOM052722	0	1	0	0	0	0	0	0	0	0	0	0	0	0	0	0	0	0	1	0
HOM060966	0	1	0	0	0	0	0	0	0	0	0	0	0	0	0	0	0	0	1	0
HOM062997	0	1	0	0	0	0	0	0	0	0	0	0	0	0	0	0	0	0	1	0
HOM065075	0	1	0	0	0	0	0	0	0	0	0	0	0	0	0	0	0	0	2	1
HOM067144	0	1	0	0	0	0	0	0	0	0	0	0	0	0	0	0	0	0	1	0
HOM067165	0	1	0	0	0	0	0	0	0	0	0	0	0	0	0	0	0	0	2	1
HOM069252	0	1	0	0	0	0	0	0	0	0	0	0	0	0	0	0	0	0	1	0
HOM071353	0	1	0	0	0	0	0	0	0	0	0	0	0	0	0	0	0	0	3	0
HOM071359	0	1	0	0	0	0	0	0	0	0	0	0	0	0	0	0	0	0	2	1
HOM073424	0	1	0	0	0	0	0	0	0	0	0	0	0	0	0	0	0	0	2	0
HOM075529	0	1	0	0	0	0	0	0	0	0	0	0	0	0	0	0	0	0	1	0
HOM079703	0	1	0	0	0	0	0	0	0	0	0	0	0	0	0	0	0	0	1	0
HOM079720	0	1	0	0	0	0	0	0	0	0	0	0	0	0	0	0	0	0	4	2
HOM085952	0	1	0	0	0	0	0	0	0	0	0	0	0	0	0	0	0	0	1	0
HOM088040	0	1	0	0	0	0	0	0	0	0	0	0	0	0	0	0	0	0	1	0
HOM090074	0	1	0	0	0	0	0	0	0	0	0	0	0	0	0	0	0	0	2	1
HOM090077	0	1	0	0	0	0	0	0	0	0	0	0	0	0	0	0	0	0	1	0
HOM094649	0	1	0	0	0	0	0	0	0	0	0	0	0	0	0	0	0	0	2	1
HOM096429	0	1	0	0	0	0	0	0	0	0	0	0	0	0	0	0	0	0	1	0
HOM103569	0	1	0	0	0	0	0	0	0	0	0	0	0	0	0	0	0	0	2	1
HOM104496	0	1	0	0	0	0	0	0	0	0	0	0	0	0	0	0	0	0	1	0
HOM108327	0	1	0	0	0	0	0	0	0	0	0	0	0	0	0	0	0	0	1	0
HOM110547	0	1	0	0	0	0	0	0	0	0	0	0	0	0	0	0	0	0	2	0
HOM121889	0	1	0	0	0	0	0	0	0	0	0	0	0	0	0	0	0	0	2	0
HOM124991	0	1	0	0	0	0	0	0	0	0	0	0	0	0	0	0	0	0	2	0
HOM125049	0	1	0	0	0	0	0	0	0	0	0	0	0	0	0	0	0	0	1	0

## Sheet: a.thaliana.decrease
	AL	AT	BD	CP	FV	GM	LJ	MD	ME	MT	OS	PT	RC	SB	SM	TC	VV	ZM	At_reclustering	At_oases			AL	AT	BD	CP	FV	GM	LJ	MD	ME	MT	OS	PT	RC	SB	SM	TC	VV	ZM
HOM000001	265	242	277	354	290	490	251	746	304	274	293	313	292	270	1171	309	315	272	179	347		At_reclustering	0.916781	0.910292	0.841579	0.855456	0.912272	0.89523	0.922533	0.885968	0.877623	0.824366	0.811635	0.880034	0.887271	0.80577	0.505861	0.832832	0.849684	0.849267
HOM000002	156	122	202	123	230	317	167	760	232	300	307	359	187	256	164	282	209	191	191	230		At_oases	0.888493	0.893758	0.829665	0.890512	0.894581	0.863996	0.894925	0.853065	0.843068	0.777162	0.791965	0.836664	0.881586	0.784653	0.610776	0.825604	0.834779	0.826775
HOM000003	214	219	192	197	247	369	234	471	207	257	203	280	206	233	156	212	165	238	282	461
HOM000004	192	179	175	147	166	409	197	346	335	191	184	295	180	181	83	165	160	248	189	203
HOM000005	152	157	140	95	167	240	154	388	200	203	208	241	179	224	154	207	178	149	109	113
HOM000006	145	116	125	59	156	235	125	496	148	423	157	324	103	141	22	165	179	99	103	108
HOM000007	151	143	107	102	119	312	105	293	197	109	127	211	132	122	36	138	153	185	96	108
HOM000008	202	145	3	19	203	197	183	788	65	422	2	213	73	5	8	54	111	4	189	205
HOM000010	119	117	108	76	97	298	125	199	159	110	122	172	92	127	39	96	77	175	72	79
HOM000012	74	74	142	57	67	185	99	168	104	105	149	117	75	148	82	80	76	144	37	44
HOM000013	109	111	129	63	73	198	76	168	115	98	148	113	75	158	39	95	40	170	68	72
HOM000015	14	21	83	37	53	120	58	301	90	136	158	162	71	96	99	115	68	84	29	34
HOM000017	80	94	86	57	82	169	83	208	96	75	118	121	69	81	29	109	72	73	89	121
HOM000018	102	96	75	61	84	159	92	188	113	67	94	141	79	88	18	85	68	117	69	87
HOM000020	96	69	72	68	69	141	88	204	85	108	77	97	85	75	83	68	96	74	56	70
HOM000021	110	95	83	63	80	150	61	170	90	76	86	125	61	75	60	66	58	94	71	87
HOM000022	31	47	34	13	88	199	46	322	117	140	70	168	52	42	9	179	84	18	57	65
HOM000023	65	55	72	39	97	105	48	246	87	83	96	133	71	91	111	72	83	80	44	49
HOM000025	80	60	68	70	66	129	105	137	74	72	56	111	56	62	43	60	53	78	76	77
HOM000027	56	50	54	52	46	98	63	149	68	50	49	79	42	52	31	45	50	63	62	67
HOM000028	78	71	82	53	54	177	64	142	106	82	95	106	62	85	18	58	59	122	57	64
HOM000029	82	84	70	52	75	148	91	123	69	93	60	126	80	70	74	75	71	65	43	45
HOM000030	69	62	54	79	57	135	80	146	75	63	55	94	52	59	60	58	73	83	122	165
HOM000031	65	59	87	59	71	131	75	157	79	84	100	87	66	99	44	69	55	85	51	64
HOM000033	49	47	49	49	50	118	79	103	68	88	67	89	64	69	51	77	94	64	50	66
HOM000040	52	51	55	58	60	99	66	153	63	66	65	74	60	79	25	52	47	66	47	53
HOM000041	82	54	72	23	47	94	44	124	57	61	116	62	46	80	16	52	44	58	44	54
HOM000042	41	37	49	46	56	112	52	119	77	66	58	94	49	78	48	44	42	88	39	45
HOM000043	65	62	51	58	52	98	48	119	77	41	50	83	46	47	23	57	52	70	56	68
HOM000044	56	55	54	30	40	109	53	111	56	45	60	65	34	55	19	36	43	87	60	66
HOM000045	16	27	90	37	90	103	16	132	28	82	33	65	30	211	0	39	37	22	42	44
HOM000046	54	51	43	37	53	105	74	111	63	43	50	70	49	51	15	64	66	44	49	63
HOM000047	64	53	45	39	46	117	47	127	63	42	54	78	42	53	24	42	37	68	63	78
HOM000049	58	61	26	35	53	244	52	70	85	106	24	74	17	31	15	68	42	38	31	33
HOM000050	49	47	47	42	43	122	61	92	59	49	66	70	48	63	16	55	44	59	48	52
HOM000051	21	37	27	23	41	63	32	57	50	130	74	104	61	103	12	80	24	21	10	13
HOM000052	31	26	7	12	65	49	14	124	99	84	19	193	40	7	0	137	110	5	35	53
HOM000054	50	54	58	26	38	80	49	78	47	60	56	66	44	53	22	47	59	48	33	35
HOM000058	39	33	40	36	44	99	35	132	46	61	50	48	29	45	34	29	25	56	27	28
HOM000062	23	20	62	22	29	76	36	63	33	43	81	49	29	63	74	35	26	72	22	29
HOM000063	49	44	40	37	38	89	55	105	56	35	47	64	42	42	10	35	32	51	54	65
HOM000065	34	35	61	27	32	83	36	77	42	23	58	38	26	79	15	28	31	93	22	23
HOM000066	32	34	24	36	59	30	25	94	54	41	54	66	51	47	18	47	96	37	15	24
HOM000067	12	39	35	24	35	49	12	79	47	32	78	64	41	51	3	102	78	22	26	32
HOM000069	25	25	37	25	31	52	37	111	42	38	55	56	31	67	19	44	68	46	16	20
HOM000071	30	31	36	22	39	59	43	73	41	61	36	55	51	33	28	39	33	35	35	47
HOM000072	41	30	29	44	52	57	43	86	45	28	40	82	46	34	34	48	58	28	23	26
HOM000073	26	18	21	26	44	65	21	102	47	39	44	126	32	29	14	42	77	28	22	31
HOM000074	19	20	53	28	36	62	32	84	41	33	68	67	36	53	18	32	38	61	19	22
HOM000076	39	36	30	54	34	68	52	86	43	24	37	50	26	30	14	28	28	50	42	47
HOM000078	17	21	42	22	54	54	22	81	54	23	48	59	26	50	38	38	54	42	13	15
HOM000080	42	34	41	29	31	79	27	68	53	30	41	63	36	38	12	38	38	53	32	40
HOM000081	20	25	30	6	60	54	12	99	45	84	52	133	31	23	0	54	12	10	7	16
HOM000084	33	33	36	31	44	67	24	37	47	44	42	55	32	47	33	40	40	50	11	13
HOM000087	29	28	28	29	31	65	37	58	35	26	28	39	27	31	20	26	27	39	35	42
HOM000088	34	34	31	38	27	71	25	92	46	39	31	53	29	29	20	32	29	44	39	46
HOM000089	39	33	32	23	33	70	36	55	39	37	30	42	53	37	20	36	36	35	22	23
HOM000090	33	27	28	23	25	53	29	89	28	18	26	33	22	19	31	23	24	35	36	40
HOM000092	31	35	27	27	31	78	34	91	44	33	38	47	28	34	13	30	29	37	43	57
HOM000093	43	35	36	20	38	42	26	69	30	50	50	44	25	42	17	42	27	39	29	32
HOM000097	20	17	22	10	20	54	29	95	38	39	46	41	46	55	17	29	43	29	8	12
HOM000098	39	37	20	31	30	70	38	52	49	28	30	43	29	27	12	29	37	35	11	14
HOM000100	8	7	80	5	5	22	6	13	12	4	131	12	6	135	0	5	6	40	8	9
HOM000101	24	23	29	37	18	47	28	11	30	28	26	44	22	32	19	25	22	34	52	55
HOM000104	16	22	23	26	29	37	33	35	31	33	29	38	20	44	14	23	22	34	28	35
HOM000106	29	30	22	23	19	46	38	50	27	30	34	32	23	32	8	17	42	38	48	52
HOM000109	20	20	19	20	20	49	19	49	32	19	18	40	24	20	18	29	21	48	20	21
HOM000112	33	29	22	21	23	56	19	51	39	22	23	39	24	18	12	21	24	29	18	23
HOM000114	14	10	1	15	54	52	14	98	32	57	1	62	16	1	1	46	96	7	6	9
HOM000115	86	76	4	4	54	21	56	48	3	162	5	6	3	7	0	9	4	15	28	37
HOM000116	28	20	21	13	55	37	17	78	20	33	25	76	22	23	1	33	33	11	33	39
HOM000121	18	17	21	23	30	42	39	46	18	37	18	38	20	22	25	29	37	15	33	41
HOM000123	29	20	17	17	67	40	33	114	29	24	17	33	16	15	6	17	15	18	18	21
HOM000124	29	29	24	20	18	63	14	56	39	19	28	37	21	24	5	19	19	42	18	26
HOM000127	4	5	22	2	20	14	4	33	1	12	12	80	7	85	0	128	2	13	3	6
HOM000129	39	25	27	19	16	56	19	55	35	26	25	33	19	22	7	19	19	28	18	23
HOM000130	24	23	22	26	28	38	11	19	22	33	19	28	23	21	23	22	15	21	57	59
HOM000133	30	28	15	29	27	46	32	51	28	50	20	33	33	18	3	27	19	16	12	29
HOM000135	26	23	20	15	16	46	20	40	25	59	40	29	18	30	2	15	14	30	24	39
HOM000136	20	15	16	23	24	34	31	70	28	17	18	35	23	19	5	27	25	26	26	30
HOM000137	25	25	24	20	26	39	24	48	25	24	26	33	20	25	11	18	21	32	24	31
HOM000138	45	36	20	19	32	40	32	44	21	18	27	29	22	30	5	26	11	23	36	42
HOM000141	11	7	23	14	28	26	21	29	33	30	20	29	20	27	40	27	25	28	6	11
HOM000142	23	25	12	25	13	31	14	71	25	18	43	28	19	20	10	40	40	15	14	19
HOM000143	15	10	11	18	17	38	31	47	21	18	13	22	40	10	52	19	21	18	10	11
HOM000145	31	22	15	28	21	44	31	50	33	28	16	23	24	19	3	24	30	18	26	27
HOM000149	32	27	20	13	20	50	18	46	26	25	22	32	18	27	5	17	11	27	16	18
HOM000153	32	27	13	23	18	52	16	6	20	24	21	76	18	15	0	44	19	16	18	32
HOM000155	28	27	26	16	19	47	17	35	30	14	28	25	17	26	3	15	10	50	14	17
HOM000158	18	17	19	15	17	55	19	55	24	41	17	24	15	25	5	12	17	28	16	21
HOM000160	25	17	18	15	17	52	16	34	28	18	23	27	18	21	15	22	17	24	18	22
HOM000161	20	18	16	14	18	42	26	43	27	14	19	27	14	24	12	20	17	33	18	28
HOM000163	26	26	8	18	17	39	24	51	30	33	12	29	17	10	11	16	18	15	25	31
HOM000165	26	23	19	14	13	38	14	45	16	32	21	24	12	22	5	15	18	26	25	42
HOM000166	26	24	23	20	18	37	14	42	19	20	25	29	21	27	3	15	11	22	10	21
HOM000167	11	7	34	14	7	8	2	7	6	3	74	49	7	42	0	22	21	24	7	21
HOM000168	14	14	27	16	12	48	16	29	29	16	25	34	17	28	1	21	10	42	10	13
HOM000169	31	23	13	10	23	25	8	24	20	27	40	17	16	14	13	14	20	21	7	8
HOM000170	14	14	34	13	27	38	20	31	15	18	29	22	13	28	21	25	12	19	6	7
HOM000171	18	17	19	16	15	31	21	23	27	12	20	32	17	17	6	19	16	25	15	17
HOM000173	20	17	14	23	22	39	14	48	24	19	13	28	16	15	14	23	20	16	14	17
HOM000178	22	14	13	39	13	24	29	51	24	21	17	16	10	15	7	17	13	23	30	46
HOM000181	6	6	11	17	20	45	27	56	19	39	16	22	14	10	8	26	14	13	9	11
HOM000182	47	141	0	24	9	4	2	12	12	2	0	27	12	0	0	111	2	0	32	68
HOM000186	24	23	20	14	15	31	19	26	15	17	19	27	15	22	5	18	16	29	20	24
HOM000190	10	9	17	8	23	22	9	63	15	7	18	41	16	22	7	18	31	21	8	9
HOM000193	16	16	8	15	20	44	10	35	20	19	15	39	19	9	8	30	22	9	17	21
HOM000194	19	16	17	18	15	31	24	38	25	14	22	25	15	21	4	16	16	23	22	29
HOM000198	21	17	17	12	14	33	18	29	20	34	19	20	11	18	7	11	9	26	20	21
HOM000199	27	20	13	15	12	22	18	46	17	18	17	27	17	12	17	17	16	14	18	31
HOM000200	11	10	18	10	20	23	17	40	13	19	21	17	13	25	6	20	15	31	13	17
HOM000201	16	14	9	11	13	29	12	24	16	11	16	17	11	11	44	10	12	13	12	13
HOM000203	21	21	11	10	18	24	14	24	29	22	19	29	20	14	11	17	17	15	17	18
HOM000204	15	13	15	24	16	21	14	27	18	18	15	15	13	20	25	14	12	23	30	35
HOM000207	15	18	23	2	12	10	8	19	14	22	36	39	27	18	0	33	19	5	11	13
HOM000212	11	13	16	14	11	28	16	46	21	15	14	28	15	24	13	14	14	16	12	17
HOM000213	16	15	8	16	14	13	14	46	9	12	13	19	13	30	2	14	57	15	8	10
HOM000214	23	16	27	9	22	25	19	28	29	9	21	29	13	24	1	16	9	15	13	14
HOM000216	16	17	15	12	10	51	19	28	25	17	14	18	11	16	9	16	11	21	15	16
HOM000219	12	12	16	12	9	27	25	36	17	21	18	16	11	18	2	11	11	19	15	16
HOM000226	13	17	12	10	14	26	15	27	12	14	13	29	24	15	26	14	11	14	19	20
HOM000227	22	20	15	13	14	25	12	27	18	11	15	24	14	14	4	13	13	21	24	25
HOM000230	3	18	15	13	12	34	29	35	13	34	15	17	9	29	1	15	11	19	17	21
HOM000232	10	9	0	13	46	14	14	75	25	8	0	42	41	0	1	30	7	0	2	6
HOM000234	19	17	16	13	14	28	24	26	17	17	15	25	12	10	5	15	14	17	23	34
HOM000235	21	17	14	13	12	21	9	35	16	13	14	22	18	16	12	14	14	14	17	28
HOM000236	13	12	13	9	17	24	9	26	20	10	25	16	18	26	9	19	15	24	6	10
HOM000238	4	4	11	4	6	18	21	17	11	21	34	18	6	39	5	8	25	16	3	4
HOM000240	12	10	13	13	11	37	14	44	20	12	14	23	14	14	4	13	14	24	11	19
HOM000243	13	13	15	11	15	29	14	33	20	7	7	30	11	14	8	14	11	19	15	20
HOM000244	18	19	10	14	15	33	22	36	21	20	11	20	12	11	4	15	15	17	16	19
HOM000251	17	17	12	13	13	34	12	35	19	14	15	20	11	13	1	13	10	18	16	19
HOM000254	27	20	9	15	21	15	15	28	14	9	11	16	11	12	5	11	20	13	9	10
HOM000255	18	15	17	9	11	23	9	27	18	10	20	18	12	17	6	10	10	18	14	16
HOM000256	12	12	11	12	8	24	13	35	16	23	12	18	10	13	4	10	11	21	20	21
HOM000259	14	13	12	18	9	28	21	35	13	14	13	21	10	14	6	10	10	17	25	28
HOM000262	15	15	13	11	11	43	20	25	20	14	15	22	11	14	4	11	6	21	5	7
HOM000263	12	12	15	10	9	40	15	21	16	17	20	17	11	15	6	13	8	24	10	12
HOM000264	14	15	15	14	19	27	10	20	17	15	17	15	16	15	9	19	13	15	18	32
HOM000266	13	15	8	13	19	35	20	25	18	9	12	22	13	11	3	17	15	11	14	17
HOM000270	12	11	15	10	10	31	12	10	22	16	16	20	11	15	17	14	13	15	8	9
HOM000271	15	17	15	11	11	30	16	23	25	33	12	23	11	8	2	10	9	16	18	28
HOM000272	15	14	13	7	9	16	7	27	19	9	18	23	9	18	23	11	15	19	12	14
HOM000274	10	9	13	11	10	16	19	26	10	11	11	14	9	13	13	9	13	14	20	25
HOM000278	14	12	12	8	11	21	17	25	17	12	13	21	16	15	7	12	11	14	12	13
HOM000280	13	3	25	0	19	5	27	17	0	68	1	10	1	25	0	0	0	3	2	4
HOM000281	20	13	16	10	19	20	12	20	14	13	17	16	10	19	9	9	9	16	12	15
HOM000282	17	12	12	10	11	33	24	21	20	15	11	16	11	9	6	10	11	19	14	19
HOM000283	19	11	10	8	19	17	12	29	17	23	15	17	8	9	3	11	9	10	14	16
HOM000284	24	19	12	7	21	19	29	28	8	30	12	14	9	11	0	14	13	7	7	10
HOM000288	10	18	12	13	9	24	20	14	14	13	9	25	13	11	6	15	15	13	24	26
HOM000290	15	13	24	3	23	2	45	41	3	29	20	8	6	18	0	3	1	5	1	2
HOM000291	19	20	9	10	9	26	12	21	13	11	16	14	10	16	21	21	9	13	14	20
HOM000297	17	13	11	10	12	35	18	25	16	20	11	15	12	11	5	8	10	14	15	16
HOM000299	10	6	5	5	5	18	16	14	10	10	7	11	23	3	24	5	9	9	8	10
HOM000300	14	14	11	10	11	33	13	24	16	14	11	16	9	12	0	12	9	18	12	14
HOM000302	17	15	6	13	10	37	11	27	18	23	8	21	14	10	6	16	14	7	8	9
HOM000303	17	16	12	12	11	31	9	22	16	12	15	18	9	10	3	11	13	20	15	16
HOM000305	14	10	17	5	10	27	10	20	15	10	20	15	11	22	4	8	5	26	6	8
HOM000306	15	14	13	7	10	25	16	27	12	7	18	13	6	16	1	8	9	20	19	21
HOM000314	5	12	11	9	11	25	19	36	14	6	11	16	9	14	2	9	13	17	13	15
HOM000315	13	13	9	11	9	23	12	17	14	11	12	21	13	9	6	15	10	11	8	9
HOM000317	11	10	10	12	10	23	22	23	14	11	10	19	11	11	3	10	12	12	11	14
HOM000318	12	14	13	10	8	18	11	30	16	11	18	17	12	15	4	10	9	15	11	12
HOM000319	13	11	11	10	8	28	16	35	14	13	10	17	8	15	1	8	7	18	24	29
HOM000323	13	11	13	8	12	16	7	26	14	10	14	14	10	15	10	10	5	24	7	11
HOM000324	16	13	12	13	7	24	10	16	17	9	15	18	12	16	6	15	9	18	9	10
HOM000325	14	14	11	13	13	22	12	18	16	10	10	16	9	11	2	10	9	9	21	22
HOM000326	7	8	9	11	8	15	17	33	11	18	10	16	21	11	4	17	20	10	10	12
HOM000327	14	11	10	12	8	22	18	23	10	12	11	13	10	14	16	9	10	17	7	8
HOM000331	12	9	9	15	9	22	13	22	14	10	12	12	8	15	6	9	8	20	19	20
HOM000335	15	14	11	15	9	27	12	24	19	10	10	18	12	16	1	13	6	17	9	11
HOM000339	11	10	8	17	17	19	14	22	15	19	10	15	12	14	3	10	9	15	12	15
HOM000340	15	15	13	10	9	22	9	16	15	10	13	15	9	13	5	12	17	17	21	25
HOM000347	11	9	12	10	7	26	13	21	14	11	12	21	10	14	7	10	8	23	9	11
HOM000348	16	11	14	7	9	14	10	34	11	9	16	16	9	14	5	9	9	14	3	6
HOM000349	13	11	11	10	12	29	15	30	13	11	12	16	9	12	2	9	10	14	15	16
HOM000351	11	11	16	9	10	25	12	15	15	9	15	11	11	17	5	8	10	18	1	3
HOM000352	9	9	5	9	13	19	8	35	13	11	7	14	12	8	8	13	11	10	12	13
HOM000354	8	6	9	10	6	19	5	35	12	7	12	19	7	11	3	9	14	17	9	10
HOM000355	13	12	10	10	12	31	11	18	16	9	12	17	12	11	2	10	15	9	13	16
HOM000356	13	12	12	8	6	21	7	23	19	10	15	20	11	16	2	11	10	21	9	10
HOM000358	13	10	7	6	10	25	6	15	14	12	17	12	8	11	10	10	17	15	6	10
HOM000359	19	14	10	6	10	22	11	32	10	33	13	13	6	8	2	16	10	7	15	18
HOM000361	6	7	13	6	17	21	10	30	16	11	11	18	13	10	5	12	15	12	7	8
HOM000363	12	9	11	9	11	18	9	40	12	5	11	13	8	10	2	11	9	16	13	14
HOM000367	11	11	10	8	8	29	10	34	14	5	11	15	9	11	3	8	9	26	12	14
HOM000374	12	10	13	10	9	31	9	23	16	12	13	18	10	10	2	10	7	16	8	10
HOM000378	19	13	9	10	11	15	11	20	11	13	10	15	9	11	4	14	12	11	9	13
HOM000379	14	12	10	4	8	12	7	35	10	13	13	8	6	13	3	9	11	12	6	8
HOM000381	7	6	18	6	7	23	7	16	10	14	19	8	11	19	3	8	5	26	2	5
HOM000384	9	9	16	9	11	22	10	14	10	9	18	9	8	16	10	10	5	15	10	14
HOM000385	8	7	10	7	9	16	12	31	9	10	9	12	10	8	3	7	7	12	9	11
HOM000389	1	8	22	6	9	9	2	16	5	10	26	4	13	25	2	6	7	24	20	27
HOM000391	9	7	12	10	11	21	17	15	12	27	8	12	8	11	1	10	10	9	16	19
HOM000394	13	10	10	5	8	25	16	17	16	11	15	17	6	11	2	9	8	20	10	11
HOM000397	10	8	9	13	10	17	14	20	11	9	10	9	10	9	11	8	5	11	11	13
HOM000401	11	9	20	8	7	15	11	18	12	9	0	17	10	24	0	5	11	20	14	20
HOM000402	12	10	9	7	8	19	3	24	9	9	11	15	10	8	8	8	8	14	14	16
HOM000404	10	10	8	11	8	20	15	25	13	18	6	21	10	6	3	10	11	12	11	12
HOM000405	13	12	7	8	11	27	9	20	19	8	13	15	10	12	0	9	8	18	3	6
HOM000412	8	9	12	10	10	22	7	17	17	9	12	17	13	9	3	10	10	18	9	13
HOM000417	8	8	12	6	7	19	6	17	11	10	22	13	8	17	1	6	10	14	10	14
HOM000423	11	11	9	7	10	21	7	26	11	7	12	13	8	11	4	9	7	16	12	13
HOM000426	4	5	9	5	37	20	9	29	12	6	10	9	8	8	1	20	5	8	4	5
HOM000428	19	14	9	5	11	23	9	17	13	8	13	14	7	8	5	9	8	13	6	7
HOM000431	1	1	1	1	0	31	19	0	2	125	2	9	1	2	1	15	3	0	1	2
HOM000433	9	10	4	5	5	20	79	9	10	11	5	10	5	6	4	5	5	9	6	8
HOM000436	15	12	12	7	8	22	9	27	12	10	10	11	6	12	5	7	7	13	12	13
HOM000437	7	7	16	7	9	12	4	21	7	4	8	16	7	5	4	12	10	13	6	12
HOM000442	13	12	11	7	8	18	8	19	15	7	14	14	9	13	2	10	6	18	6	12
HOM000445	8	8	13	7	9	23	16	9	9	13	11	8	6	14	4	11	8	11	11	17
HOM000447	14	13	12	7	9	13	5	21	12	5	15	11	7	14	5	8	6	19	7	17
HOM000449	9	9	8	8	7	26	3	18	13	11	10	13	9	11	13	9	9	10	10	15
HOM000450	9	9	13	4	8	14	10	20	12	8	10	17	8	12	5	9	17	13	8	9
HOM000451	12	11	4	10	12	21	9	21	12	3	8	13	8	10	5	11	6	17	8	12
HOM000460	7	7	8	12	12	13	6	31	10	16	11	12	7	10	2	8	8	9	7	9
HOM000463	10	8	9	7	7	19	9	17	11	9	12	16	8	9	5	8	9	14	8	11
HOM000464	10	8	5	6	11	27	8	17	18	6	10	17	11	10	2	9	6	11	1	2
HOM000467	10	10	9	8	6	15	9	19	9	13	14	15	8	6	3	8	9	12	6	9
HOM000470	9	9	8	7	10	18	8	31	11	10	7	12	5	8	5	9	8	12	6	9
HOM000473	7	9	14	5	6	22	6	14	11	8	16	12	7	16	1	7	7	20	6	7
HOM000474	8	10	7	12	7	16	13	15	13	4	8	10	6	9	8	6	11	10	11	13
HOM000476	8	11	16	3	2	10	3	6	8	7	21	9	10	22	10	2	2	19	5	6
HOM000477	8	6	9	5	6	15	12	16	7	10	10	17	9	13	6	9	9	15	6	12
HOM000478	10	10	7	10	10	21	10	12	14	7	13	14	11	9	3	10	7	12	7	9
HOM000479	4	9	4	11	21	18	7	47	17	4	5	8	13	6	0	12	7	5	6	8
HOM000481	4	10	6	7	10	20	10	25	17	8	8	13	11	7	5	10	8	12	6	10
HOM000483	13	10	11	7	6	20	5	16	13	6	12	13	8	11	3	8	8	17	8	12
HOM000487	10	10	11	5	7	22	9	12	10	7	14	11	7	12	2	5	9	12	12	14
HOM000488	8	9	12	6	7	15	8	8	13	7	9	10	5	10	7	4	5	17	6	9
HOM000493	2	10	21	6	4	19	7	16	6	5	14	13	7	17	3	5	5	21	7	9
HOM000496	8	9	7	5	11	19	4	25	7	6	9	11	10	6	5	10	8	13	11	13
HOM000497	6	7	8	4	8	17	12	14	9	13	6	18	7	7	4	16	13	10	4	6
HOM000498	10	10	7	6	5	10	10	20	7	27	7	10	6	7	6	6	6	6	15	16
HOM000500	8	8	6	6	10	26	9	5	16	13	7	14	10	10	3	7	9	6	5	6
HOM000502	11	10	8	9	11	13	11	5	7	3	7	16	8	12	11	7	11	8	11	16
HOM000506	13	8	6	5	8	10	6	8	6	7	9	8	4	9	40	6	5	6	10	11
HOM000507	6	6	7	7	7	15	7	34	9	7	7	11	5	8	2	5	6	11	4	6
HOM000509	13	12	6	8	7	8	12	9	5	7	7	7	10	9	5	3	9	9	10	16
HOM000514	9	7	13	7	9	17	12	19	6	7	11	9	6	13	1	5	10	15	9	10
HOM000516	11	11	15	3	15	19	16	11	7	7	10	5	5	17	0	6	5	7	8	16
HOM000517	7	8	9	8	9	21	9	15	15	10	5	18	9	5	1	14	9	6	4	5
HOM000519	8	9	8	9	4	25	7	13	12	8	10	17	9	7	3	10	4	12	8	13
HOM000525	5	5	9	7	13	17	13	17	6	13	11	10	7	9	2	7	5	12	8	10
HOM000526	10	9	7	7	6	13	14	20	7	10	5	12	5	5	5	7	11	7	7	10
HOM000527	1	4	34	8	7	0	10	19	9	7	12	11	9	13	9	2	4	12	5	6
HOM000531	13	11	11	7	5	13	9	32	8	7	8	12	6	9	0	8	8	12	12	14
HOM000538	13	11	11	5	7	15	13	5	7	14	11	9	6	9	1	6	7	8	14	22
HOM000540	7	8	9	6	6	14	6	10	8	18	9	8	5	8	0	30	6	10	3	5
HOM000541	11	10	4	9	11	16	9	22	9	6	9	10	9	7	1	7	9	4	6	9
HOM000545	9	11	7	8	4	18	6	13	19	4	10	14	7	11	3	7	4	12	10	21
HOM000550	2	3	3	5	5	4	37	6	7	38	7	4	4	16	8	6	6	5	5	9
HOM000551	13	12	6	10	8	11	8	16	13	15	4	14	8	7	2	10	19	2	9	17
HOM000552	10	11	11	6	6	10	10	9	10	8	15	8	10	11	3	7	5	11	11	17
HOM000557	16	11	4	8	12	21	12	11	12	7	6	11	7	4	2	7	9	5	4	5
HOM000564	10	10	5	8	9	18	14	15	9	9	5	11	7	4	5	6	7	6	6	8
HOM000565	9	8	8	5	9	20	8	16	10	9	9	11	7	8	2	8	9	12	8	9
HOM000566	12	13	11	4	3	24	7	8	9	2	11	16	6	11	0	8	5	11	6	9
HOM000568	8	5	6	2	12	3	8	65	4	3	7	5	6	12	4	5	4	4	6	9
HOM000569	8	8	7	6	6	16	8	17	9	6	9	15	6	6	5	6	7	9	16	21
HOM000570	10	7	7	8	7	21	7	19	13	4	7	13	7	6	1	8	7	10	6	8
HOM000572	18	14	11	5	5	16	5	8	7	4	11	11	6	11	2	6	5	14	10	12
HOM000573	7	5	10	10	3	11	22	19	5	8	9	9	3	8	6	3	5	8	15	20
HOM000574	11	9	12	5	5	11	13	9	6	15	11	6	5	15	3	5	2	11	2	7
HOM000576	7	9	8	5	5	18	6	19	9	4	8	12	4	7	4	4	5	14	10	12
HOM000578	10	9	7	6	5	21	8	16	7	7	7	10	6	8	5	6	8	9	13	17
HOM000580	7	6	7	7	8	10	7	24	8	6	6	7	8	5	5	6	7	13	10	11
HOM000581	10	9	8	4	3	14	4	9	7	4	8	30	7	6	6	6	5	11	18	25
HOM000589	8	7	6	8	5	15	7	9	10	11	7	13	6	8	1	6	11	12	15	17
HOM000590	7	7	8	5	12	16	4	22	11	5	5	7	9	7	3	9	12	6	6	7
HOM000591	11	9	6	5	7	15	8	17	13	6	6	10	6	6	2	11	7	8	7	12
HOM000596	8	8	9	6	5	17	5	15	11	6	10	10	6	5	5	7	7	13	6	8
HOM000601	7	5	8	6	10	11	6	21	8	5	10	9	7	11	5	6	6	8	8	10
HOM000605	5	5	7	5	4	19	10	15	9	8	12	8	5	9	2	6	7	10	5	6
HOM000606	9	12	0	2	14	5	7	10	6	86	0	7	5	0	0	2	2	0	2	6
HOM000608	9	9	5	5	5	13	12	9	8	7	6	10	6	8	3	6	4	5	12	14
HOM000609	11	9	6	3	8	14	6	23	14	7	6	12	7	8	2	7	8	6	4	7
HOM000616	9	9	6	4	4	20	6	12	8	7	6	7	6	7	11	16	11	6	7	8
HOM000617	9	10	5	6	5	17	11	18	8	12	5	8	6	6	3	5	7	7	15	18
HOM000618	7	7	8	10	8	10	1	0	9	8	7	7	8	7	6	7	7	7	12	23
HOM000620	5	4	13	5	8	4	2	19	6	12	15	10	3	16	0	5	7	15	1	2
HOM000625	7	5	6	5	8	9	6	16	6	6	6	6	7	6	3	6	7	7	6	7
HOM000629	5	3	6	5	6	11	11	24	7	3	5	10	7	4	5	6	6	6	3	5
HOM000630	7	4	6	5	5	15	11	20	7	8	10	8	7	6	3	7	7	5	7	10
HOM000638	7	7	7	4	14	17	10	19	7	9	8	7	7	6	2	11	6	6	4	5
HOM000650	6	6	8	6	7	19	4	16	9	5	9	10	6	10	1	5	5	18	5	7
HOM000651	7	7	6	6	5	15	13	8	8	4	6	11	4	6	3	7	5	7	13	16
HOM000657	8	8	4	7	11	13	10	23	10	10	4	10	11	7	4	5	6	1	4	8
HOM000662	8	8	7	6	6	13	4	19	9	9	7	8	7	7	2	6	6	10	7	8
HOM000663	8	5	5	10	4	9	11	17	6	7	6	7	5	6	5	6	5	8	18	29
HOM000664	6	6	10	7	5	16	8	12	7	5	10	6	5	7	2	5	9	9	6	7
HOM000665	12	11	5	5	4	19	12	7	9	6	8	8	5	7	1	6	6	10	16	18
HOM000666	8	2	0	7	6	4	49	13	1	23	0	9	21	1	0	6	5	2	1	7
HOM000667	6	7	8	2	3	5	2	12	7	7	9	6	5	11	12	10	10	12	6	9
HOM000668	7	7	4	9	5	12	3	17	7	7	4	10	5	4	3	6	10	7	10	14
HOM000672	47	22	4	3	2	9	5	7	4	16	4	6	3	4	5	2	3	5	11	14
HOM000675	7	8	7	8	6	16	5	12	10	5	6	13	6	7	4	7	6	8	11	13
HOM000677	7	7	4	5	7	16	6	17	8	6	5	7	6	4	4	7	11	8	8	10
HOM000680	1	11	2	11	11	14	7	20	8	8	3	17	5	3	2	9	10	4	15	20
HOM000683	7	7	9	6	5	15	9	5	7	9	8	10	5	8	3	5	5	12	8	9
HOM000687	5	2	5	6	5	33	5	15	7	0	5	25	8	6	0	11	4	5	2	3
HOM000693	6	6	5	12	6	14	10	22	10	3	4	10	7	5	3	8	10	7	9	11
HOM000701	8	12	6	7	7	9	7	11	10	3	7	9	5	11	7	5	4	11	20	27
HOM000702	10	9	7	3	4	13	5	15	6	3	7	8	4	7	0	7	5	11	12	14
HOM000704	9	8	7	6	9	12	4	13	9	5	8	11	6	7	2	7	7	7	3	5
HOM000705	8	9	11	6	5	11	6	11	9	5	10	4	4	10	2	6	3	11	2	6
HOM000708	7	8	4	5	7	9	7	22	9	5	3	12	8	3	3	9	7	7	6	8
HOM000709	3	3	6	6	9	7	7	17	3	12	2	6	3	7	3	5	4	5	11	13
HOM000710	11	5	4	5	8	11	7	12	6	7	4	10	5	5	9	4	8	4	9	13
HOM000711	6	6	4	6	6	16	5	21	9	5	6	11	6	8	3	6	7	8	4	5
HOM000712	7	7	6	4	4	13	10	14	9	5	7	12	5	11	0	5	7	13	9	11
HOM000713	7	5	5	4	3	8	7	7	3	12	4	5	4	10	25	2	14	7	9	14
HOM000715	7	7	4	6	9	13	6	4	7	5	5	6	5	4	3	7	7	6	7	8
HOM000716	5	5	6	4	5	13	7	23	6	6	7	5	7	6	4	3	4	6	3	4
HOM000717	6	10	7	4	2	4	8	8	6	3	12	4	11	11	5	6	6	11	16	20
HOM000719	7	6	6	6	5	14	11	10	8	7	8	8	5	7	3	7	5	9	10	18
HOM000722	11	9	5	3	8	13	15	19	7	5	5	9	3	6	3	7	4	7	5	8
HOM000723	7	7	3	6	7	12	6	21	8	9	3	10	7	2	2	6	6	7	7	9
HOM000724	8	6	5	5	5	15	7	15	11	4	5	10	7	5	4	6	9	10	7	9
HOM000725	8	8	8	4	5	20	7	13	8	5	11	6	5	8	0	5	4	12	4	6
HOM000726	9	8	7	5	6	16	6	12	10	4	5	7	4	5	2	5	6	11	9	10
HOM000727	7	8	5	5	4	15	6	10	10	3	6	10	5	9	2	5	5	12	7	8
HOM000732	7	7	7	6	5	14	7	9	8	4	7	8	8	13	2	7	5	10	9	14
HOM000738	5	5	6	5	4	17	16	6	4	2	6	10	3	5	3	4	6	9	4	5
HOM000740	3	3	5	6	8	12	4	11	10	3	6	14	6	7	5	8	9	7	4	6
HOM000743	5	3	11	3	3	10	8	7	5	8	14	5	2	14	4	4	6	11	5	13
HOM000744	12	9	6	7	3	14	4	10	11	6	7	8	7	6	0	6	9	9	8	9
HOM000749	7	7	7	3	5	12	8	12	7	5	6	8	5	6	3	6	6	11	6	7
HOM000750	4	4	3	3	3	7	2	36	5	10	11	7	4	4	4	5	6	11	2	6
HOM000754	7	7	6	5	7	14	9	17	7	4	7	8	6	6	2	6	7	7	14	15
HOM000755	2	3	17	4	3	16	3	19	5	37	3	3	5	2	0	2	4	4	1	2
HOM000757	12	13	1	16	12	4	9	17	6	11	1	8	18	1	1	9	2	1	16	27
HOM000759	1	1	0	1	1	3	4	1	1	126	0	1	1	0	0	2	0	0	1	2
HOM000762	7	7	4	4	4	18	3	13	9	15	6	5	5	4	5	4	4	17	7	8
HOM000767	7	5	6	4	6	16	10	10	10	4	6	8	7	6	4	9	7	5	5	7
HOM000772	10	8	7	4	4	17	7	7	7	9	8	8	3	7	1	4	6	8	12	13
HOM000776	7	7	6	6	6	7	7	12	7	1	6	5	5	10	12	7	5	7	14	18
HOM000781	2	2	5	17	3	1	12	25	11	4	4	7	2	6	7	6	3	5	13	14
HOM000784	6	7	4	5	3	11	7	14	6	5	5	6	5	3	2	4	6	14	7	9
HOM000793	12	10	4	4	7	13	5	14	9	5	5	9	5	6	8	5	1	7	4	5
HOM000794	4	4	6	7	5	9	8	18	7	5	7	10	5	8	2	11	5	7	10	23
HOM000803	6	6	6	7	9	10	4	6	9	2	6	7	7	9	3	6	6	6	7	11
HOM000807	8	8	5	6	8	18	3	14	10	7	4	11	6	4	2	6	5	5	7	9
HOM000824	5	6	5	6	5	9	5	10	5	6	5	7	6	4	3	5	7	7	5	6
HOM000828	5	5	10	3	5	10	8	6	4	7	10	5	4	8	6	5	8	7	5	7
HOM000831	7	8	5	5	5	10	6	9	8	5	6	9	5	6	2	5	10	7	5	6
HOM000833	8	8	5	3	12	11	7	11	5	4	4	8	3	4	1	7	6	7	9	11
HOM000835	7	5	6	4	6	10	6	11	7	4	11	8	10	5	1	4	4	11	9	10
HOM000844	4	6	5	4	6	8	5	9	6	2	7	9	5	5	8	4	12	9	5	6
HOM000848	6	6	7	5	4	14	6	5	5	3	7	7	5	6	2	4	4	9	5	6
HOM000849	4	5	6	3	3	11	9	5	7	6	10	6	4	12	4	5	4	10	5	7
HOM000851	6	6	5	4	5	15	8	9	7	6	6	8	4	6	1	4	4	9	3	4
HOM000855	5	5	5	5	6	9	1	10	9	3	4	10	9	4	15	8	5	1	3	6
HOM000856	4	4	4	5	3	10	5	8	5	3	5	7	4	6	2	4	5	4	5	6
HOM000863	6	5	5	3	5	4	8	26	6	11	6	6	3	4	0	6	3	6	9	13
HOM000871	1	4	4	2	4	8	3	11	17	0	2	45	3	5	0	2	5	2	13	16
HOM000872	6	6	4	3	7	16	8	13	7	3	4	10	3	7	3	5	4	9	5	7
HOM000873	5	7	4	4	4	12	8	18	7	8	4	7	4	4	0	5	4	7	9	10
HOM000882	5	5	8	4	4	11	3	9	7	4	7	10	4	9	1	8	4	13	7	8
HOM000884	4	4	5	7	5	18	5	10	6	5	5	12	5	4	1	5	4	5	3	4
HOM000890	5	6	4	5	4	10	6	16	5	2	4	6	3	3	2	3	3	8	5	7
HOM000891	5	5	5	8	7	10	4	8	8	4	6	6	6	4	3	9	5	5	4	5
HOM000896	5	5	4	5	6	8	5	15	6	3	6	8	5	8	6	5	4	5	7	10
HOM000897	4	4	5	9	4	11	4	11	6	5	6	11	4	5	1	5	8	8	9	11
HOM000908	9	5	7	8	5	9	1	6	7	2	6	8	5	5	0	5	6	8	4	5
HOM000909	10	12	3	4	6	8	11	10	6	4	4	8	4	2	5	6	3	5	6	7
HOM000910	4	4	7	5	8	7	3	19	5	3	5	7	4	5	3	4	7	7	4	6
HOM000911	3	3	7	3	3	11	5	10	7	5	7	6	3	9	2	3	3	12	4	5
HOM000913	5	5	6	5	4	10	6	7	5	6	7	8	5	7	3	4	4	7	5	9
HOM000914	5	5	4	3	3	10	7	8	3	20	4	5	3	4	1	8	7	6	5	6
HOM000920	1	5	12	7	3	14	4	9	7	4	4	8	4	7	0	4	5	12	12	17
HOM000921	7	8	2	4	5	11	7	17	6	6	4	10	5	2	3	4	6	5	5	6
HOM000926	4	4	2	5	10	9	7	14	6	6	4	8	5	9	3	6	6	5	1	2
HOM000928	2	2	3	8	7	7	9	12	7	5	2	4	3	2	8	8	10	2	3	5
HOM000940	6	6	2	3	3	13	7	5	7	11	7	9	4	4	0	8	3	4	5	8
HOM000943	4	4	7	4	2	11	6	5	5	4	6	7	9	15	1	4	4	8	3	4
HOM000944	3	3	2	6	3	7	8	18	10	10	2	19	4	4	1	3	5	2	8	10
HOM000945	6	5	5	5	4	11	5	13	8	7	5	8	5	3	2	6	4	7	4	5
HOM000952	6	6	5	3	3	7	6	8	6	2	5	10	3	4	2	3	3	20	6	7
HOM000954	5	5	6	5	3	7	3	5	7	6	5	8	5	6	2	4	7	7	6	8
HOM000955	10	7	9	2	3	8	4	6	2	2	8	4	3	4	18	5	2	9	5	6
HOM000958	3	5	5	6	7	10	7	8	8	7	4	8	8	4	5	5	5	7	4	5
HOM000968	4	4	6	4	3	9	3	8	5	5	7	6	4	6	3	4	5	7	3	5
HOM000969	11	8	6	4	4	8	6	7	7	3	7	6	5	6	1	3	3	4	6	9
HOM000971	9	6	5	4	4	10	6	10	7	3	4	10	4	5	0	4	5	12	7	11
HOM000976	4	3	4	2	4	6	2	33	4	0	5	5	3	3	8	3	3	4	8	10
HOM000977	4	4	5	6	7	11	9	12	5	4	6	5	4	7	1	5	4	7	7	8
HOM000979	5	6	4	4	3	9	6	7	4	2	4	5	4	4	7	5	4	4	5	7
HOM000980	7	6	4	5	9	5	5	8	5	6	4	14	2	3	1	4	5	3	6	7
HOM000981	5	4	3	4	2	6	4	13	5	4	3	6	3	5	7	3	4	4	4	8
HOM000983	6	5	6	4	4	14	7	11	4	4	6	4	3	6	1	4	4	10	6	7
HOM000985	5	5	4	4	5	9	6	13	7	8	4	7	6	5	6	4	4	7	6	10
HOM000989	8	6	4	5	2	11	3	4	4	9	7	6	7	4	0	2	10	4	5	6
HOM000993	6	6	3	4	4	10	9	8	4	3	5	7	3	5	2	5	4	5	7	9
HOM000997	9	5	5	3	6	9	7	11	3	5	5	8	2	3	0	4	4	4	3	4
HOM001004	4	5	6	3	3	7	7	12	4	4	4	3	4	4	3	5	4	4	3	4
HOM001007	5	4	6	4	8	11	6	3	7	4	4	10	5	5	3	6	5	6	9	10
HOM001009	14	5	4	5	2	4	6	4	5	7	5	6	2	4	1	3	2	9	5	6
HOM001019	9	8	3	3	4	10	4	22	5	1	6	6	4	2	4	3	2	5	14	19
HOM001020	3	4	4	4	4	8	4	10	6	3	4	11	4	4	3	8	3	4	2	4
HOM001027	2	6	5	1	4	7	4	7	7	5	10	10	4	5	0	11	3	5	2	3
HOM001030	4	4	4	3	4	8	3	11	6	4	6	10	4	4	1	4	4	4	5	6
HOM001037	8	6	4	3	7	9	4	9	8	4	5	9	3	3	0	10	4	6	5	8
HOM001038	8	6	7	4	3	10	2	8	6	2	7	10	4	7	1	5	2	9	6	7
HOM001039	5	5	6	3	3	13	4	10	5	4	8	4	3	4	0	3	4	7	4	5
HOM001044	4	3	5	2	3	9	3	11	6	3	6	7	4	5	1	4	4	6	4	5
HOM001047	5	4	3	4	4	6	8	6	7	6	3	9	3	6	0	4	6	8	10	12
HOM001056	6	4	5	4	6	13	5	4	6	4	6	7	3	6	2	4	4	9	2	5
HOM001060	5	5	6	4	5	8	5	7	5	3	6	7	5	6	2	4	3	8	16	21
HOM001063	4	3	4	5	5	10	3	8	5	8	5	8	3	4	2	4	4	7	3	4
HOM001066	5	5	3	4	5	14	7	9	6	2	3	5	4	3	3	4	5	4	5	7
HOM001069	8	13	2	5	11	9	1	6	4	4	5	12	2	7	0	6	2	3	5	12
HOM001070	2	2	3	3	8	7	1	27	5	11	3	6	3	4	0	4	3	8	3	5
HOM001072	6	5	5	3	5	11	5	4	7	2	6	7	3	5	2	4	4	11	6	8
HOM001076	4	3	6	3	3	13	7	9	8	12	5	6	4	5	0	4	2	5	3	4
HOM001077	5	6	6	4	3	11	6	5	7	1	8	9	3	7	0	3	4	8	5	10
HOM001078	5	4	4	5	4	6	3	9	6	5	5	10	5	5	1	5	3	10	4	14
HOM001079	3	3	5	5	4	13	10	11	5	4	5	6	4	4	2	6	5	4	7	12
HOM001082	3	3	4	3	5	9	6	11	4	2	4	5	4	2	4	3	3	7	3	5
HOM001089	4	4	4	4	4	9	4	9	4	7	4	6	4	6	1	3	4	6	3	4
HOM001092	5	5	3	6	3	9	4	13	7	3	4	8	3	2	3	3	4	3	4	5
HOM001093	1	1	0	2	46	0	2	10	3	0	2	10	7	0	0	16	2	0	1	4
HOM001096	7	6	4	3	7	7	5	16	7	2	6	6	4	5	0	3	3	6	5	6
HOM001097	7	6	6	5	3	11	4	7	6	3	6	6	3	4	1	3	3	6	4	5
HOM001100	6	6	6	2	5	8	3	6	10	2	7	7	6	6	0	5	4	6	6	7
HOM001101	7	5	3	3	4	11	5	11	7	4	3	5	4	5	2	4	4	8	3	5
HOM001102	3	3	3	4	4	11	3	13	8	6	4	8	5	4	1	5	5	5	3	4
HOM001106	4	4	4	5	3	11	4	18	5	4	4	5	5	4	2	5	5	4	4	6
HOM001109	5	3	4	1	5	8	4	8	5	5	4	7	3	5	2	4	6	4	2	4
HOM001110	4	3	4	3	3	5	5	11	6	2	4	6	3	6	2	3	3	5	5	7
HOM001111	5	4	5	4	5	9	3	8	6	5	5	7	4	7	1	5	4	7	3	4
HOM001115	4	4	4	4	2	10	8	9	5	3	4	7	3	4	2	3	5	4	3	6
HOM001122	8	7	3	3	2	10	4	7	6	4	4	14	5	5	1	5	5	4	6	8
HOM001126	6	5	8	5	4	6	3	7	5	1	5	6	3	4	1	3	3	8	4	7
HOM001130	7	4	5	3	4	8	5	4	7	4	4	5	5	4	3	5	3	4	5	6
HOM001131	4	4	3	4	4	9	5	5	4	7	11	5	4	7	4	3	3	3	5	6
HOM001135	4	3	4	4	6	8	1	8	4	7	6	4	6	6	1	5	4	8	1	2
HOM001137	4	4	4	5	4	7	3	6	6	2	6	6	5	5	3	4	4	5	3	4
HOM001139	5	5	4	4	7	11	5	7	7	3	4	7	3	5	2	5	5	4	4	7
HOM001144	4	4	4	4	6	6	2	14	7	4	4	7	3	5	1	4	6	5	3	4
HOM001145	4	3	6	6	3	7	7	4	6	1	6	6	6	3	8	3	5	5	4	5
HOM001146	11	6	3	4	5	14	5	5	5	5	3	8	3	5	2	5	1	3	2	4
HOM001155	5	6	3	3	3	8	5	13	5	3	3	7	4	6	2	4	5	2	6	12
HOM001156	6	3	2	2	10	4	4	9	4	1	4	3	5	2	10	3	5	2	7	10
HOM001158	5	5	3	4	4	10	7	10	7	8	3	10	5	3	1	5	2	3	4	5
HOM001159	7	8	3	2	2	26	0	5	4	7	4	9	3	1	0	5	1	8	3	5
HOM001166	6	4	3	3	7	10	5	13	4	2	4	5	3	3	2	4	4	4	3	4
HOM001171	2	3	3	4	2	7	6	13	4	3	4	7	3	3	1	4	3	3	3	5
HOM001181	5	3	4	5	6	7	5	10	5	10	4	7	3	4	1	4	5	2	8	10
HOM001184	5	4	4	4	3	7	4	11	3	7	4	5	3	4	4	3	4	8	4	5
HOM001186	4	4	3	6	3	7	5	7	4	4	4	3	3	4	0	5	3	6	7	8
HOM001191	8	7	5	5	3	8	3	9	4	3	6	5	2	6	1	2	2	9	11	12
HOM001192	3	3	4	4	4	10	4	8	5	4	4	5	3	6	1	3	4	10	3	4
HOM001193	2	1	5	1	2	3	17	4	4	14	2	5	7	5	1	2	8	4	5	6
HOM001196	3	4	5	4	2	6	4	6	4	5	7	5	2	3	3	4	3	4	7	8
HOM001204	2	5	3	5	5	11	5	10	6	1	5	10	5	4	0	4	4	7	4	6
HOM001205	5	5	4	3	4	8	3	6	8	2	5	7	4	5	2	4	4	9	6	9
HOM001206	6	5	7	4	6	10	3	8	5	8	4	5	3	2	0	5	4	6	4	5
HOM001207	4	2	2	7	2	4	6	11	4	10	2	5	2	4	3	2	2	7	14	19
HOM001208	7	5	2	3	5	7	4	7	6	5	2	4	3	2	2	3	3	3	3	5
HOM001210	6	5	4	4	4	9	4	10	6	7	2	8	4	3	3	4	4	5	5	7
HOM001216	6	6	5	4	2	8	4	5	7	5	4	8	3	4	0	3	5	5	12	13
HOM001217	5	9	1	1	10	6	4	11	4	0	2	5	4	2	4	6	8	3	2	3
HOM001221	2	2	2	5	4	5	12	11	2	16	2	9	2	2	2	2	5	3	4	5
HOM001222	4	4	3	4	3	8	3	7	4	3	3	6	3	4	3	4	3	5	4	5
HOM001223	9	9	3	2	2	5	3	7	3	4	3	5	3	3	4	3	3	3	7	8
HOM001229	2	3	3	6	3	7	10	6	6	4	3	6	4	3	3	6	4	4	10	11
HOM001230	5	5	3	4	4	10	4	6	5	5	4	5	3	5	1	5	1	7	3	5
HOM001232	6	4	3	5	4	21	2	4	3	1	4	4	3	2	1	2	14	3	3	5
HOM001234	3	3	3	3	3	6	3	9	4	2	3	4	3	4	2	3	12	8	7	9
HOM001239	3	3	9	3	3	10	3	10	6	1	5	5	3	4	4	3	2	6	2	3
HOM001244	6	4	3	2	2	6	4	11	5	1	4	5	4	4	2	3	2	7	4	7
HOM001247	9	9	5	3	3	6	4	1	6	2	5	6	3	5	0	2	2	15	3	4
HOM001252	8	2	1	0	6	5	4	23	4	3	3	9	4	2	1	6	0	2	7	9
HOM001258	4	4	4	4	3	7	3	8	5	3	4	7	5	4	4	3	5	6	3	4
HOM001266	2	2	16	2	1	5	1	4	2	3	9	3	2	14	1	3	2	7	1	4
HOM001268	5	5	4	3	3	8	4	8	6	4	3	4	3	3	7	5	4	4	6	9
HOM001273	1	2	1	1	2	7	8	28	2	7	1	7	2	1	1	2	12	1	4	5
HOM001275	5	5	5	3	3	7	3	11	4	6	5	4	2	4	2	4	5	3	1	2
HOM001279	5	5	4	4	4	10	4	10	4	1	4	8	5	5	1	5	4	5	3	5
HOM001280	7	9	0	1	14	2	1	32	1	1	0	3	1	0	1	3	1	0	5	8
HOM001303	5	5	2	3	4	8	2	16	8	4	2	4	4	2	3	5	1	3	5	7
HOM001307	5	5	3	3	3	6	3	13	5	3	4	7	2	2	3	4	3	5	5	7
HOM001313	4	4	1	2	3	9	4	8	6	2	9	6	3	6	1	3	3	3	6	13
HOM001329	5	3	3	3	4	5	3	8	2	3	3	4	4	3	2	2	6	7	3	4
HOM001338	2	2	4	3	3	5	4	6	4	5	3	3	3	7	3	2	3	12	5	8
HOM001342	7	7	3	3	5	8	4	6	6	2	4	5	3	3	3	3	3	4	7	10
HOM001344	4	5	0	0	5	7	3	9	12	5	0	20	4	1	0	7	5	0	1	2
HOM001354	5	4	4	4	4	6	4	7	5	6	4	4	3	4	2	3	4	6	3	4
HOM001356	2	2	2	5	2	4	5	3	3	7	2	3	2	2	10	2	2	2	2	5
HOM001357	2	4	2	2	4	6	2	6	2	2	5	4	2	5	1	3	2	4	4	5
HOM001361	4	3	4	3	2	7	3	9	4	3	3	7	3	4	2	2	3	7	5	6
HOM001367	3	3	3	3	3	5	3	6	3	3	3	4	4	3	3	3	3	3	4	5
HOM001373	7	6	4	2	2	6	8	8	2	3	4	4	2	8	0	3	2	4	2	3
HOM001375	7	6	2	4	5	8	3	9	5	4	2	5	4	2	1	5	3	2	4	7
HOM001376	3	4	4	4	4	11	6	7	6	11	2	4	4	2	0	3	3	5	5	6
HOM001382	3	3	2	5	3	8	5	11	4	4	2	5	4	2	2	5	4	4	4	6
HOM001383	3	3	4	3	3	7	5	5	3	7	3	6	4	3	1	2	3	3	1	2
HOM001387	6	6	2	5	4	6	7	7	6	6	2	10	3	1	1	5	2	2	5	6
HOM001392	7	5	1	4	1	6	5	5	4	3	1	4	3	1	14	6	2	3	3	4
HOM001393	0	1	0	0	1	2	1	3	2	0	0	4	1	0	64	1	1	0	2	3
HOM001404	47	37	0	0	0	0	0	0	0	0	0	0	0	0	0	0	0	0	7	8
HOM001405	5	5	3	3	3	7	6	7	4	3	3	4	4	3	1	4	4	4	5	9
HOM001407	4	3	3	2	1	9	9	7	4	2	5	4	2	4	2	4	4	5	4	6
HOM001420	5	5	3	4	6	12	5	5	6	3	1	10	3	1	0	4	3	2	3	6
HOM001425	3	3	5	3	3	9	1	7	8	4	4	6	4	4	0	4	3	6	4	5
HOM001427	2	2	3	4	3	6	3	14	4	4	3	5	5	3	5	3	5	4	2	3
HOM001430	5	3	3	5	5	6	7	4	7	4	2	7	3	3	4	3	3	3	9	13
HOM001432	6	5	3	1	3	6	5	9	4	3	2	5	3	2	1	3	2	4	7	8
HOM001434	5	5	6	3	3	8	4	5	3	8	4	3	3	4	2	3	3	4	4	5
HOM001435	3	3	3	3	3	10	7	9	3	3	3	7	3	3	2	3	4	5	5	7
HOM001442	3	3	4	2	6	5	2	6	5	1	5	4	3	4	3	3	3	5	1	2
HOM001447	3	3	3	1	3	5	4	6	4	1	3	4	3	3	7	4	3	2	3	4
HOM001454	2	2	3	2	2	4	3	26	3	1	3	2	2	3	2	2	2	5	5	7
HOM001456	4	4	3	2	2	6	3	11	4	2	3	2	2	2	0	2	3	6	2	3
HOM001457	6	6	4	2	2	9	6	6	6	1	4	4	2	9	0	2	2	5	3	4
HOM001468	4	4	2	4	3	4	6	6	4	4	2	4	3	4	3	4	3	3	2	6
HOM001469	4	4	3	4	2	9	3	2	9	5	3	7	2	3	2	2	7	3	3	4
HOM001470	5	5	2	2	3	8	3	5	4	4	1	5	5	3	4	3	5	5	3	4
HOM001472	1	2	0	0	14	3	8	24	2	21	0	2	2	0	0	1	0	0	2	4
HOM001476	8	4	2	3	6	9	5	12	5	1	2	5	2	1	3	3	3	2	4	5
HOM001481	5	5	3	4	3	4	2	11	4	4	5	6	3	3	1	3	3	3	6	8
HOM001485	3	3	2	3	5	4	5	6	3	5	2	3	2	3	2	7	2	2	3	4
HOM001497	32	2	2	3	2	1	3	7	4	1	1	6	1	1	2	2	1	1	5	8
HOM001505	5	5	3	2	6	6	2	6	3	3	3	4	2	3	2	4	3	6	11	12
HOM001507	4	3	2	3	2	8	8	8	2	6	2	4	4	2	1	2	3	4	5	7
HOM001517	4	3	5	3	4	8	4	7	3	7	1	6	4	4	1	2	3	4	9	16
HOM001520	5	2	2	2	3	6	5	5	3	2	3	4	2	3	2	2	7	3	4	5
HOM001541	3	3	3	2	4	4	4	4	2	1	3	4	4	3	1	4	2	5	2	3
HOM001543	3	3	2	2	2	6	2	8	5	1	2	5	3	1	0	4	5	4	2	3
HOM001547	3	3	2	3	4	8	5	11	3	3	2	6	4	3	1	3	2	4	3	4
HOM001558	3	3	2	7	4	6	4	8	2	5	2	3	4	3	2	2	2	3	6	10
HOM001563	3	3	2	2	2	5	4	9	4	2	2	4	2	2	3	2	3	3	2	4
HOM001567	4	4	1	2	3	8	4	21	6	2	1	4	2	1	1	2	2	3	3	6
HOM001576	3	1	2	2	12	7	1	7	2	2	5	2	6	7	0	4	3	3	3	8
HOM001580	4	3	4	2	2	5	3	6	3	2	4	3	2	4	2	2	2	9	2	3
HOM001584	3	2	2	3	2	6	7	6	3	4	3	4	2	3	1	2	3	4	3	4
HOM001589	6	2	3	2	1	4	4	9	2	2	3	3	2	3	1	2	3	5	3	4
HOM001593	3	2	2	2	15	3	4	9	2	8	2	2	2	2	1	2	3	2	4	8
HOM001594	3	3	3	3	3	4	3	9	5	1	4	5	3	4	1	4	3	4	3	4
HOM001597	4	4	2	2	2	4	1	11	1	0	1	2	2	1	1	2	2	1	5	6
HOM001598	2	2	7	3	3	7	4	10	3	3	3	3	2	3	3	2	2	3	3	6
HOM001603	3	3	2	4	3	6	2	13	6	3	2	2	3	2	1	3	3	2	2	3
HOM001609	7	4	3	5	4	6	2	7	4	3	3	7	4	3	0	3	3	2	3	6
HOM001613	5	5	3	2	2	8	3	2	4	4	3	4	2	3	7	2	2	3	5	9
HOM001619	8	6	4	3	1	8	2	6	4	3	3	5	1	5	2	3	1	3	7	12
HOM001623	3	3	2	2	1	9	2	5	3	2	4	4	4	4	2	3	2	6	1	3
HOM001626	3	4	3	3	2	9	4	7	4	2	3	7	3	3	1	3	3	3	5	6
HOM001636	3	3	3	4	4	5	5	3	3	5	4	3	3	5	4	2	2	4	3	5
HOM001639	3	3	2	4	5	6	2	7	4	4	2	2	3	4	0	2	15	2	2	5
HOM001652	3	3	2	3	3	8	4	7	5	4	2	4	3	2	1	3	6	3	5	6
HOM001653	2	2	4	3	4	7	4	6	2	3	6	4	3	3	1	3	3	5	2	3
HOM001668	3	3	3	4	0	3	3	1	3	2	3	8	3	4	4	3	2	5	5	9
HOM001671	4	4	2	1	4	8	4	7	6	3	2	5	4	3	0	3	3	3	3	6
HOM001677	4	3	3	1	3	5	3	12	3	1	3	5	2	3	1	3	2	1	2	4
HOM001679	4	3	3	5	3	4	5	6	3	3	2	2	3	3	1	3	5	3	8	10
HOM001693	1	1	2	0	1	2	1	3	2	1	1	2	1	2	10	1	1	1	1	3
HOM001697	3	4	2	2	1	4	4	10	2	5	2	4	2	2	3	2	2	2	3	8
HOM001700	3	2	1	2	2	8	9	9	3	5	1	4	2	2	0	2	5	2	4	7
HOM001703	4	3	2	2	2	6	9	8	3	3	3	4	2	3	3	2	3	3	14	17
HOM001706	6	5	4	1	2	4	4	5	1	4	0	4	2	4	3	2	3	4	2	3
HOM001711	3	2	2	3	2	7	4	10	2	1	2	3	2	3	0	2	4	3	3	4
HOM001714	6	4	2	2	2	7	4	8	3	1	2	4	2	3	2	2	4	7	4	7
HOM001718	3	3	3	3	2	4	1	18	5	2	3	4	3	3	1	2	2	2	3	4
HOM001721	3	2	2	4	4	4	6	6	3	5	2	3	4	2	2	3	3	2	1	3
HOM001732	4	4	3	3	3	8	2	6	4	6	3	5	3	3	1	3	3	2	4	5
HOM001738	3	3	4	2	2	6	2	13	4	4	3	3	2	3	0	2	3	5	4	5
HOM001740	5	2	3	3	4	6	5	8	4	1	2	5	2	1	1	2	2	2	3	4
HOM001754	0	2	3	2	4	3	7	1	2	3	5	3	2	5	2	2	2	8	3	4
HOM001757	4	3	3	4	4	5	2	4	4	3	3	8	2	3	2	3	3	2	4	5
HOM001759	4	2	2	5	3	4	4	8	4	2	2	5	3	2	5	3	4	2	4	5
HOM001765	7	5	2	3	3	6	0	9	3	2	2	7	5	2	1	2	3	2	5	7
HOM001768	3	3	1	3	2	5	5	13	3	2	2	5	3	1	1	3	6	1	3	6
HOM001771	6	6	2	3	4	1	3	2	2	2	3	9	4	4	1	1	4	4	5	8
HOM001774	2	2	4	2	3	5	4	5	4	3	4	4	3	5	1	2	3	5	1	2
HOM001783	2	2	2	3	3	6	3	6	6	1	2	5	3	3	4	3	4	6	5	6
HOM001785	21	6	1	2	2	5	3	6	3	0	1	5	1	2	0	3	2	2	5	6
HOM001794	2	2	2	2	2	4	4	6	4	14	2	5	2	5	0	2	2	2	2	5
HOM001795	5	2	2	3	2	5	3	7	1	3	2	4	2	2	2	2	3	2	2	3
HOM001796	4	3	5	3	2	2	7	11	3	4	2	2	2	2	0	1	1	3	3	4
HOM001798	2	2	4	2	8	6	5	5	2	1	3	2	3	4	1	4	1	2	1	2
HOM001799	4	4	3	2	2	3	1	6	3	3	3	5	3	4	1	3	2	5	6	7
HOM001802	4	4	3	2	2	8	2	3	4	4	3	4	2	3	1	3	5	5	6	8
HOM001804	13	14	3	1	1	4	2	2	1	12	2	2	1	2	0	1	1	2	6	7
HOM001805	2	3	2	3	2	5	6	8	2	2	2	7	2	2	1	2	2	3	8	9
HOM001811	5	5	2	3	3	8	4	6	3	2	3	4	3	2	0	3	3	2	9	14
HOM001812	3	3	2	2	2	9	8	4	2	7	2	4	2	3	2	2	2	3	5	8
HOM001815	4	4	2	2	3	8	4	6	4	1	3	4	4	3	1	3	3	3	6	8
HOM001818	3	3	1	6	5	5	1	8	5	3	3	7	4	1	1	3	3	1	4	6
HOM001833	4	3	2	2	2	3	1	13	3	1	2	4	1	2	2	3	2	2	3	5
HOM001835	2	2	2	3	2	3	2	3	5	5	2	4	2	2	4	3	3	3	1	3
HOM001843	2	2	2	3	4	7	3	7	3	10	2	5	3	2	0	3	3	3	5	11
HOM001847	7	3	2	3	2	2	5	6	2	1	2	1	2	4	5	3	4	2	3	6
HOM001849	4	2	4	3	2	14	1	5	0	0	7	2	2	4	0	2	3	2	3	6
HOM001859	1	1	2	4	2	3	5	6	4	1	2	8	2	2	3	2	3	2	3	10
HOM001861	3	3	1	3	3	5	4	10	4	3	1	6	3	1	1	3	4	1	5	9
HOM001865	6	3	2	2	1	5	4	9	3	4	2	4	3	0	1	2	1	2	3	4
HOM001868	4	3	4	2	2	5	6	5	5	3	2	2	3	2	1	2	3	1	2	3
HOM001871	2	2	2	2	3	12	1	5	4	2	5	4	2	4	0	3	4	2	1	3
HOM001873	13	7	2	3	2	4	2	4	2	1	2	5	2	2	1	2	2	2	6	11
HOM001883	3	5	0	3	3	5	4	7	5	1	3	5	4	2	1	4	4	0	3	4
HOM001899	3	2	2	2	2	4	2	10	2	1	2	4	3	2	1	4	2	2	2	3
HOM001901	4	3	3	2	3	6	2	2	6	0	4	5	5	3	2	3	2	4	4	5
HOM001903	4	3	3	2	2	2	1	16	2	1	3	4	1	2	3	2	1	6	3	4
HOM001905	2	2	1	2	2	4	2	3	8	0	3	6	2	1	1	6	3	2	2	3
HOM001913	3	3	4	2	3	7	2	1	4	2	4	6	2	3	1	6	3	4	2	3
HOM001925	2	5	3	4	3	5	3	6	3	3	3	5	3	3	0	3	2	4	6	14
HOM001931	6	4	2	2	2	4	3	10	3	1	3	3	3	4	2	2	3	5	6	7
HOM001937	6	5	3	2	1	6	3	5	3	3	3	2	2	3	0	2	3	2	4	6
HOM001940	2	2	3	2	2	5	4	9	3	3	0	3	3	3	0	2	2	3	2	3
HOM001950	4	3	2	2	2	5	1	2	4	1	2	4	4	2	3	2	2	4	4	6
HOM001951	13	11	0	1	7	5	2	4	3	4	0	3	2	0	0	8	0	0	5	6
HOM001958	4	4	2	3	6	6	5	4	2	2	2	4	2	2	0	3	2	3	6	11
HOM001960	4	2	1	4	7	2	3	4	2	2	2	3	2	6	1	1	4	2	3	4
HOM001963	4	4	3	4	2	5	1	0	4	1	3	5	3	3	1	2	2	6	12	16
HOM001964	4	3	3	2	3	8	4	3	4	3	3	4	2	3	0	2	2	3	3	5
HOM001966	4	4	2	3	6	5	5	2	4	3	2	6	5	2	0	3	3	3	6	8
HOM001973	8	5	3	2	2	4	1	3	7	1	3	2	2	3	0	4	2	4	3	5
HOM001976	4	3	4	2	3	6	1	4	3	1	4	4	2	3	1	2	2	4	3	4
HOM001981	4	4	2	1	2	4	3	5	3	4	2	4	3	3	0	3	2	5	10	15
HOM001987	5	2	2	1	3	7	4	4	5	4	2	5	3	3	1	2	2	3	2	3
HOM001990	2	2	2	4	3	4	0	2	2	4	2	2	6	1	2	2	3	10	5	8
HOM001992	3	3	1	3	2	4	1	4	5	2	3	4	3	2	2	2	3	2	4	5
HOM001997	4	3	3	2	2	6	5	4	3	4	2	5	2	2	1	3	4	2	5	6
HOM002002	1	3	4	4	2	6	5	4	3	2	3	4	2	3	0	3	3	6	4	5
HOM002008	0	1	2	8	2	2	6	4	2	4	2	1	1	4	5	1	2	3	5	11
HOM002010	4	1	1	7	1	6	6	0	2	1	1	8	2	6	2	1	3	3	10	11
HOM002024	5	2	2	2	3	4	2	5	3	2	3	4	2	2	1	2	7	4	2	3
HOM002028	2	2	2	1	2	4	1	6	4	1	3	3	2	2	4	2	2	7	2	3
HOM002031	8	9	1	3	5	8	1	8	3	1	1	4	3	1	0	3	0	1	2	4
HOM002038	2	3	3	3	2	6	4	4	3	1	2	4	2	3	0	2	3	6	4	6
HOM002040	3	3	3	2	3	6	3	6	3	1	3	4	1	4	1	2	5	5	6	12
HOM002042	2	3	1	2	2	8	3	9	3	2	2	4	2	1	1	2	2	2	3	4
HOM002043	2	2	3	2	1	6	5	8	2	1	4	3	2	3	0	2	2	4	3	4
HOM002048	4	4	0	4	5	4	4	6	4	3	0	6	4	0	1	7	4	0	2	6
HOM002054	4	4	2	1	2	3	1	3	3	1	3	3	2	3	4	2	2	2	3	4
HOM002058	3	2	3	1	1	4	3	8	1	1	2	4	0	2	1	1	1	2	1	4
HOM002059	5	4	4	1	2	4	1	4	3	1	4	3	2	3	1	2	2	7	5	6
HOM002067	3	2	3	2	3	3	3	7	3	2	2	3	2	3	1	2	2	3	2	3
HOM002071	2	2	2	2	2	4	1	10	2	1	2	4	3	7	0	2	2	3	4	7
HOM002078	2	2	2	4	2	2	3	7	2	3	2	5	2	2	2	2	2	2	4	8
HOM002081	4	3	2	2	3	4	4	2	3	1	3	2	2	2	1	2	2	4	3	5
HOM002085	8	9	1	1	1	3	1	5	2	2	2	2	1	5	1	1	1	1	1	2
HOM002086	6	2	2	7	4	1	3	7	2	1	1	2	1	3	1	6	1	1	7	18
HOM002088	4	4	2	2	3	2	2	16	2	2	2	6	2	2	0	2	1	2	5	7
HOM002089	4	5	4	2	2	10	3	1	4	1	3	4	2	3	0	2	2	4	7	8
HOM002103	7	6	1	3	5	6	1	7	5	3	1	3	3	1	0	4	2	1	4	9
HOM002117	2	3	2	3	3	5	5	3	3	2	2	3	3	1	1	2	4	3	5	6
HOM002128	18	15	1	1	1	2	0	3	1	0	2	1	1	1	1	1	1	0	3	6
HOM002129	2	2	3	1	2	5	4	8	3	1	2	3	2	4	1	2	3	3	5	7
HOM002130	27	20	0	0	2	0	0	3	3	0	0	0	3	0	0	1	0	0	10	11
HOM002137	3	4	3	2	2	4	2	4	4	2	3	6	4	4	0	4	2	3	3	5
HOM002138	4	2	1	2	4	4	2	3	4	2	2	3	2	3	2	1	3	3	3	4
HOM002149	2	2	3	3	1	5	2	3	3	1	3	3	3	3	2	3	3	5	1	4
HOM002151	3	2	2	2	4	5	1	12	3	1	3	3	1	3	1	2	2	5	4	6
HOM002158	4	3	2	2	2	4	2	7	2	2	3	5	2	2	2	2	2	4	4	10
HOM002162	2	2	2	2	1	4	5	5	2	2	3	2	1	2	1	1	1	6	2	4
HOM002164	2	2	2	3	2	3	3	3	2	1	2	2	5	2	2	1	2	5	3	4
HOM002169	2	2	2	3	2	4	2	6	2	0	2	4	2	2	2	2	3	3	4	8
HOM002172	2	3	3	4	6	3	3	5	2	3	3	1	2	2	0	2	2	1	4	9
HOM002180	4	3	2	2	2	7	4	6	4	4	3	3	2	2	1	2	2	2	3	5
HOM002182	5	4	2	1	3	2	3	2	2	2	2	2	4	3	1	2	8	2	3	4
HOM002184	6	6	2	2	2	4	2	5	2	5	2	3	3	2	1	2	2	2	3	4
HOM002188	3	3	1	3	2	2	1	6	1	3	3	3	1	4	1	1	7	1	1	3
HOM002189	3	3	1	2	1	6	3	5	2	4	1	4	3	1	2	4	1	2	3	4
HOM002190	3	3	2	1	2	4	2	5	4	0	2	2	2	2	1	2	2	5	2	5
HOM002193	1	1	1	3	1	5	2	5	2	4	1	1	2	1	0	1	19	1	2	3
HOM002197	3	3	3	2	2	4	2	5	3	1	3	4	2	3	4	2	2	3	6	7
HOM002202	3	3	2	2	2	6	4	2	3	4	3	3	2	2	0	4	4	1	2	3
HOM002204	1	1	1	3	2	4	0	12	3	3	2	5	4	2	1	2	2	1	3	4
HOM002211	2	2	3	2	2	5	1	4	3	3	3	6	2	3	1	3	2	4	2	3
HOM002213	4	3	2	2	1	8	4	9	4	6	1	3	2	1	0	2	1	2	2	3
HOM002223	1	2	3	2	2	3	1	8	3	1	3	2	2	4	1	2	1	3	4	9
HOM002227	2	2	1	2	2	5	1	10	7	1	1	4	4	2	0	5	2	2	2	3
HOM002236	4	4	2	2	6	4	2	1	3	3	2	4	2	2	1	3	2	3	1	2
HOM002240	8	2	2	2	2	4	2	6	3	2	2	4	2	3	1	2	2	1	2	3
HOM002244	2	2	2	3	1	3	4	16	3	5	3	3	1	2	0	1	1	2	8	13
HOM002248	3	2	4	2	2	6	5	3	3	2	2	5	2	3	0	3	2	2	5	6
HOM002253	2	3	3	2	1	7	6	6	4	2	1	2	2	3	0	2	2	5	3	6
HOM002254	2	2	2	2	3	4	2	3	2	2	2	5	2	4	2	2	2	3	2	3
HOM002255	2	2	2	3	2	5	2	5	4	1	2	4	2	2	1	2	2	2	4	5
HOM002256	2	2	2	2	3	6	3	3	2	1	2	2	2	1	0	3	2	3	5	8
HOM002268	1	1	9	1	1	2	1	0	1	0	12	2	1	4	1	2	1	0	2	3
HOM002273	2	2	2	2	3	3	1	3	2	3	2	2	2	2	2	4	2	2	1	2
HOM002284	4	2	3	2	2	6	3	3	2	0	5	2	3	5	0	2	3	3	7	9
HOM002293	2	2	2	3	1	5	3	4	3	1	2	4	2	2	1	2	2	3	3	4
HOM002298	3	2	1	2	2	2	1	6	2	5	2	4	1	4	0	1	1	3	1	3
HOM002325	4	3	2	2	2	8	2	4	4	2	2	4	2	2	1	2	2	5	6	8
HOM002333	2	2	1	1	2	4	1	6	3	2	3	3	2	2	2	2	2	1	3	4
HOM002334	4	4	1	3	2	2	3	4	2	3	1	2	2	1	1	2	8	1	2	4
HOM002342	5	5	1	3	3	3	2	4	5	5	1	6	3	1	0	2	3	1	4	5
HOM002344	2	2	2	2	1	2	1	17	1	1	1	3	2	2	0	1	1	3	3	5
HOM002353	2	2	2	1	2	6	3	3	2	11	2	1	2	2	0	2	2	2	2	4
HOM002359	3	3	1	2	3	6	1	5	4	2	2	4	3	2	0	3	3	4	3	4
HOM002361	2	2	1	2	3	4	1	3	5	4	1	7	4	1	1	3	3	1	3	5
HOM002362	3	2	4	2	1	4	3	6	2	2	3	2	2	1	2	2	4	2	3	4
HOM002364	2	2	2	2	3	3	3	6	3	2	2	4	2	2	1	2	3	2	5	6
HOM002365	4	4	3	4	2	2	0	3	4	1	3	6	1	2	2	2	3	5	4	7
HOM002366	2	2	2	4	2	3	4	3	5	1	3	2	2	2	2	2	2	2	4	5
HOM002371	3	3	1	1	4	5	2	5	2	4	1	4	2	1	1	2	2	2	4	6
HOM002375	3	3	2	2	2	8	2	3	4	3	3	3	2	3	0	2	2	5	2	4
HOM002381	2	3	2	3	3	5	3	7	3	2	2	3	2	2	1	3	2	4	2	3
HOM002393	4	3	3	2	2	8	1	4	2	1	3	4	2	3	0	2	2	2	3	4
HOM002402	3	3	2	1	2	6	3	5	4	2	1	3	2	1	1	2	2	3	3	7
HOM002405	1	1	1	1	2	2	1	4	1	1	7	1	1	7	0	1	1	1	3	4
HOM002407	2	2	2	3	2	4	2	9	3	3	2	4	2	2	1	2	2	2	2	3
HOM002408	3	3	1	2	2	7	4	5	2	3	4	4	3	2	0	2	2	1	4	5
HOM002414	3	2	2	4	2	6	5	4	2	3	2	3	2	2	1	4	2	2	4	5
HOM002416	2	2	2	2	3	4	4	4	2	2	2	2	3	1	1	2	2	4	3	4
HOM002419	6	2	1	5	2	2	3	3	3	7	1	2	2	1	1	2	4	1	1	2
HOM002422	3	2	1	1	2	15	4	8	4	3	1	3	2	1	0	1	0	1	1	2
HOM002425	5	2	1	3	1	4	0	10	2	4	1	3	1	1	1	3	1	1	3	5
HOM002439	2	4	1	2	2	1	2	3	1	1	3	0	1	11	2	2	2	6	7	10
HOM002460	2	2	2	2	3	4	5	6	2	0	4	3	2	0	2	2	2	1	3	4
HOM002464	2	1	1	5	1	2	5	7	6	1	2	2	1	2	1	1	3	5	11	19
HOM002467	3	1	2	4	1	4	2	2	2	1	2	4	1	2	2	2	2	3	1	2
HOM002469	3	4	3	2	2	4	2	5	3	2	3	3	2	3	0	2	1	5	1	4
HOM002472	2	2	1	1	1	2	2	14	4	0	3	2	1	1	1	1	1	2	2	3
HOM002477	3	4	2	2	2	6	4	4	2	0	2	2	2	3	1	2	2	2	3	4
HOM002484	3	3	2	2	2	4	0	6	3	3	1	4	2	3	1	2	1	1	4	6
HOM002487	3	3	2	2	1	6	2	4	3	1	2	3	2	2	1	3	2	3	5	6
HOM002488	2	2	1	4	2	4	3	7	2	2	1	3	2	2	0	2	2	3	8	10
HOM002489	5	4	1	1	3	4	2	5	2	1	2	2	1	2	2	1	1	1	2	3
HOM002490	6	4	3	1	4	2	1	1	1	3	1	6	1	1	1	1	1	5	4	5
HOM002491	3	3	0	3	3	8	4	6	6	1	0	6	3	0	0	3	2	0	2	4
HOM002495	3	3	2	2	2	4	2	5	4	2	2	4	2	4	0	2	2	2	2	6
HOM002497	4	4	1	2	2	4	3	8	2	2	1	2	2	2	0	1	1	1	2	3
HOM002503	2	2	1	4	2	4	2	4	5	0	1	5	2	1	1	2	2	2	3	4
HOM002508	5	5	2	1	2	5	1	4	4	1	3	5	2	2	0	2	1	3	2	9
HOM002514	4	3	2	2	1	5	1	2	2	3	3	6	2	1	0	2	1	3	1	2
HOM002516	4	4	0	0	2	8	4	11	4	2	0	5	2	0	0	2	3	0	2	5
HOM002517	3	3	1	3	3	4	2	4	5	2	1	6	3	1	1	3	2	2	4	5
HOM002521	3	2	1	7	1	1	2	1	1	2	1	3	1	3	7	1	4	1	4	6
HOM002523	2	2	2	3	2	4	2	3	3	2	2	3	2	2	1	2	2	4	3	4
HOM002526	1	1	2	1	1	2	1	2	2	1	1	1	3	1	22	1	1	2	4	6
HOM002531	1	1	1	3	1	2	7	7	5	0	5	2	1	1	1	1	1	2	5	8
HOM002536	1	1	1	3	2	4	2	7	1	3	1	3	1	5	1	1	1	2	3	7
HOM002540	2	2	2	2	3	5	1	3	4	1	2	3	4	2	2	2	2	1	3	4
HOM002541	1	3	3	3	2	7	1	6	3	1	2	4	2	2	1	2	1	2	5	6
HOM002545	2	2	2	2	2	7	2	5	2	2	2	3	1	2	1	2	1	3	5	6
HOM002549	3	2	3	2	2	5	0	4	3	2	3	2	2	2	0	2	1	6	4	6
HOM002556	1	1	1	1	2	2	1	1	1	1	22	1	1	1	2	1	1	1	3	4
HOM002558	2	2	2	2	3	3	2	2	2	3	2	2	2	2	1	2	2	3	2	3
HOM002574	2	2	2	2	2	5	2	4	2	2	2	3	2	2	1	2	2	2	2	3
HOM002576	3	3	1	2	3	2	1	9	1	1	1	1	2	1	1	1	6	1	3	5
HOM002580	2	2	1	3	1	4	3	5	2	4	1	2	2	2	0	2	1	4	2	4
HOM002581	1	2	1	2	4	4	0	6	3	2	2	3	3	1	2	2	3	2	2	3
HOM002582	1	1	2	1	8	2	1	12	1	2	2	1	1	1	1	1	2	1	2	3
HOM002583	2	2	1	1	3	2	2	5	2	2	2	2	2	6	1	1	1	2	3	5
HOM002585	1	1	2	2	1	4	7	4	1	5	1	2	1	8	1	1	1	3	2	4
HOM002586	2	2	1	1	1	4	4	6	3	3	1	4	1	1	1	1	1	3	2	5
HOM002594	5	4	2	2	1	4	2	2	1	2	2	3	2	2	2	1	1	3	1	2
HOM002609	2	2	2	1	1	5	2	5	1	0	2	2	1	3	0	1	2	2	3	4
HOM002616	1	1	2	3	2	4	2	6	2	1	3	3	2	4	0	3	3	4	2	3
HOM002627	4	2	2	2	4	3	1	2	3	1	2	3	2	2	1	2	2	2	2	3
HOM002631	33	16	0	0	0	0	0	0	0	0	0	0	0	0	0	0	0	0	4	6
HOM002637	2	2	2	3	1	2	2	5	2	1	3	4	2	3	1	1	2	2	1	3
HOM002641	4	1	1	3	2	4	7	3	2	3	1	3	1	1	1	1	1	1	5	6
HOM002642	2	2	2	1	2	3	1	13	2	2	3	2	2	2	0	2	1	2	7	9
HOM002645	2	3	2	2	2	4	2	4	3	1	2	2	2	2	1	2	2	3	3	6
HOM002658	1	1	1	2	2	4	3	13	1	1	1	2	2	1	0	2	2	1	1	4
HOM002662	5	2	1	2	8	6	3	1	1	9	1	2	1	1	0	1	1	2	2	10
HOM002667	2	3	1	2	1	4	3	6	2	5	1	2	2	2	0	1	2	3	3	4
HOM002677	2	2	2	3	2	4	2	3	2	2	3	3	2	3	1	2	2	3	2	5
HOM002685	3	1	2	3	1	2	3	4	2	1	2	3	2	1	1	5	1	2	2	3
HOM002700	2	2	2	2	2	3	3	4	3	1	2	5	2	2	1	2	3	1	1	2
HOM002706	1	1	2	4	1	1	0	1	3	2	1	2	1	4	0	1	1	3	3	6
HOM002712	2	2	1	1	2	4	3	4	3	2	3	3	2	2	1	2	2	2	1	2
HOM002715	7	3	2	1	2	2	1	6	2	1	2	2	2	1	1	1	2	2	3	4
HOM002717	1	1	2	7	1	6	2	4	1	0	2	1	2	1	1	2	4	2	4	5
HOM002719	5	4	1	2	2	4	1	10	3	2	1	3	2	1	0	2	2	1	3	7
HOM002732	2	2	2	1	2	4	2	5	3	1	3	4	2	3	0	1	2	5	1	2
HOM002734	2	2	2	2	2	4	2	6	5	0	3	3	2	2	0	2	0	5	1	4
HOM002740	37	10	0	0	0	0	0	0	0	0	0	0	0	0	0	0	0	0	1	2
HOM002743	3	4	1	1	1	2	1	5	5	0	2	5	2	1	1	1	1	3	5	6
HOM002745	0	1	1	2	1	3	0	1	1	4	1	1	2	1	4	1	1	2	4	8
HOM002748	3	1	3	1	1	2	4	1	1	1	1	2	1	1	16	1	1	1	1	4
HOM002751	2	2	2	2	2	7	2	2	1	1	2	2	2	2	0	1	2	3	2	4
HOM002761	2	2	3	1	1	3	3	3	2	2	3	2	1	3	2	2	2	3	4	5
HOM002762	2	2	3	2	1	2	2	3	2	3	2	3	1	3	1	1	1	2	3	4
HOM002768	2	2	2	2	2	2	3	4	2	1	1	2	1	4	1	1	3	2	3	4
HOM002784	2	2	2	3	2	3	3	5	2	0	1	4	2	2	1	2	2	2	2	3
HOM002787	4	3	2	3	1	2	1	3	4	2	1	3	2	2	1	3	1	2	4	6
HOM002798	0	1	6	1	1	4	2	1	2	9	1	1	1	12	0	1	1	1	3	5
HOM002799	2	2	1	1	1	2	1	4	2	1	1	2	2	1	1	1	1	2	4	5
HOM002800	1	1	1	3	1	2	1	4	2	1	1	2	1	1	1	1	1	2	3	4
HOM002802	3	2	2	2	2	7	1	4	4	0	2	4	2	2	0	2	1	4	1	3
HOM002803	3	2	2	3	1	3	3	3	2	1	2	3	2	2	3	2	2	3	5	6
HOM002812	3	3	2	1	2	4	0	2	2	2	2	6	2	2	1	2	3	1	2	3
HOM002822	2	2	1	1	2	5	0	9	2	2	2	4	2	2	2	2	2	2	2	3
HOM002827	1	1	1	1	2	7	2	9	3	1	2	2	2	1	1	1	2	2	2	3
HOM002828	2	2	2	2	1	4	3	5	1	3	2	1	1	4	0	1	1	1	2	3
HOM002829	1	1	1	4	2	1	4	0	4	3	5	3	1	1	1	1	3	1	3	4
HOM002831	1	1	3	2	2	3	2	3	2	2	2	4	2	2	1	2	3	5	2	3
HOM002832	1	1	1	2	2	6	1	7	2	3	1	2	1	1	1	1	3	2	2	3
HOM002837	0	4	2	1	1	2	1	3	3	4	3	5	2	3	0	2	1	5	3	4
HOM002845	2	2	1	2	2	3	2	9	4	2	1	2	2	1	1	2	2	2	2	4
HOM002855	4	4	1	1	2	6	3	4	3	1	1	4	2	1	1	2	2	2	6	9
HOM002863	4	2	1	3	1	2	3	1	3	3	1	4	1	1	1	1	5	3	1	3
HOM002865	3	3	1	3	1	5	2	4	2	1	1	3	2	1	1	2	2	2	2	3
HOM002874	5	3	2	2	2	5	2	7	3	1	1	3	2	2	0	2	1	1	7	9
HOM002879	2	2	4	1	2	2	2	7	1	1	2	1	2	2	1	3	2	2	4	5
HOM002882	3	3	2	3	2	5	3	2	2	2	3	2	2	3	0	2	1	2	2	9
HOM002896	1	1	1	1	5	2	0	3	1	1	1	2	1	1	2	2	1	1	4	5
HOM002897	5	2	0	2	7	5	0	7	3	3	0	5	3	0	0	3	0	0	1	2
HOM002899	2	2	1	0	2	3	1	2	5	2	1	6	5	1	1	3	0	2	1	2
HOM002910	1	1	1	2	1	1	2	1	1	2	1	1	9	1	0	1	1	1	3	4
HOM002923	2	2	2	1	2	5	2	4	3	0	2	4	2	1	0	2	2	1	1	2
HOM002924	2	2	2	2	2	2	1	4	2	2	2	5	1	2	0	2	1	3	3	4
HOM002931	2	2	2	1	2	4	2	4	3	2	2	2	2	2	4	2	2	1	2	3
HOM002932	2	2	0	2	2	10	0	5	5	3	0	5	3	0	0	3	2	0	1	3
HOM002943	1	1	2	2	2	2	5	6	3	1	1	1	3	1	0	1	1	3	7	10
HOM002948	2	2	1	2	2	7	3	3	3	3	1	3	2	2	2	2	1	2	2	4
HOM002956	3	3	1	2	2	4	1	4	2	2	1	4	4	3	1	3	2	1	3	5
HOM002965	6	2	2	2	2	4	3	2	2	1	2	2	2	1	1	1	3	3	1	4
HOM002969	2	2	1	1	4	2	1	2	1	2	1	1	2	3	2	5	1	2	3	5
HOM002975	2	1	7	1	1	2	1	2	1	1	1	2	1	3	1	1	2	6	2	3
HOM002999	3	3	3	2	2	2	3	0	2	0	0	0	3	4	1	3	2	3	3	4
HOM003004	1	1	3	1	1	3	0	6	1	3	1	4	1	1	1	1	1	6	1	2
HOM003009	2	3	1	2	2	3	3	3	3	2	1	4	2	2	1	2	2	2	5	6
HOM003012	1	1	1	1	1	2	0	13	1	3	1	1	1	1	1	2	1	1	1	2
HOM003025	3	2	4	1	1	4	1	3	2	2	3	2	2	4	1	1	0	3	2	3
HOM003028	3	3	0	2	2	9	3	6	4	1	0	4	3	0	0	2	1	0	3	7
HOM003050	1	1	1	1	1	2	3	5	1	1	5	2	1	1	1	3	1	1	1	3
HOM003065	1	1	1	1	3	2	1	2	2	1	1	1	1	1	1	8	1	3	2	3
HOM003073	3	3	1	2	2	5	2	2	3	1	1	5	3	1	0	1	5	1	4	7
HOM003076	1	1	1	1	1	2	4	0	3	1	1	11	1	1	2	1	1	2	6	9
HOM003089	2	2	1	2	2	4	3	2	3	2	1	2	2	1	1	2	2	1	3	4
HOM003090	2	2	3	2	2	4	0	2	2	1	2	2	1	2	2	1	1	2	3	8
HOM003125	1	2	0	1	0	1	5	2	0	7	3	0	3	2	1	1	1	3	1	2
HOM003130	3	2	0	2	3	7	4	4	3	5	0	4	2	0	0	2	1	0	3	5
HOM003138	1	1	2	1	1	4	4	3	2	2	2	2	1	1	4	1	2	3	1	2
HOM003145	3	2	1	2	1	4	5	2	2	0	1	3	3	2	0	2	2	3	5	7
HOM003146	2	1	1	2	1	1	4	7	2	1	1	2	1	1	1	2	1	1	3	4
HOM003160	1	1	1	1	1	2	4	1	2	2	1	3	2	2	0	1	3	1	5	7
HOM003171	3	3	1	0	3	1	1	7	2	1	2	2	1	3	1	2	1	3	6	14
HOM003174	5	2	1	1	1	4	2	4	2	0	1	3	1	1	5	1	1	4	2	4
HOM003177	2	2	2	2	2	2	0	8	2	1	1	3	1	1	0	1	1	3	3	5
HOM003185	0	1	2	5	1	2	1	2	2	4	1	6	1	2	0	2	1	1	2	4
HOM003188	1	1	1	2	1	2	6	3	1	1	2	1	1	1	2	3	1	2	2	4
HOM003192	1	1	3	1	1	4	3	3	1	2	3	1	1	4	0	2	1	5	1	2
HOM003208	2	2	3	2	2	3	1	3	2	3	2	1	2	1	1	2	2	2	3	4
HOM003212	1	1	3	1	1	2	2	6	1	1	1	2	1	3	1	1	9	2	1	7
HOM003216	1	1	1	5	1	3	2	2	7	0	2	2	2	1	0	1	4	3	5	11
HOM003223	2	2	2	1	2	3	0	5	2	0	2	1	1	2	1	2	1	2	2	3
HOM003229	1	1	1	2	1	2	2	7	3	1	1	2	2	1	2	2	2	1	2	3
HOM003233	1	2	1	5	2	2	1	1	1	8	1	1	1	1	1	2	1	2	4	6
HOM003242	3	3	1	2	2	6	1	4	2	2	1	4	2	1	1	1	1	2	2	3
HOM003246	0	1	1	1	2	6	4	7	3	3	1	3	1	1	0	1	1	2	2	8
HOM003247	2	2	2	3	2	2	3	1	3	1	2	5	2	3	0	2	1	2	5	10
HOM003249	1	1	1	1	3	4	6	4	2	3	1	2	1	1	1	1	1	4	1	5
HOM003266	1	1	1	1	1	2	2	2	1	9	1	1	1	1	0	1	1	1	2	3
HOM003281	1	1	1	1	1	2	0	6	1	0	2	2	1	1	1	5	1	1	1	2
HOM003294	3	4	1	2	1	2	0	2	2	3	2	2	1	3	1	1	2	2	8	14
HOM003296	3	1	1	1	2	4	1	6	2	1	2	2	1	2	0	1	1	2	1	2
HOM003298	3	3	2	1	1	4	1	2	2	2	2	2	1	3	1	1	1	3	5	6
HOM003305	2	2	0	2	0	4	1	3	3	1	1	2	5	0	1	6	4	1	1	3
HOM003314	2	2	1	2	1	3	3	3	5	1	1	2	1	5	1	1	1	2	6	8
HOM003315	1	1	2	1	1	4	3	3	1	1	2	3	1	2	1	1	1	2	1	2
HOM003320	1	1	1	1	1	2	1	3	2	1	1	2	1	1	8	1	1	1	2	3
HOM003322	2	2	2	2	1	4	2	3	2	1	2	2	2	2	1	2	2	2	1	2
HOM003325	1	1	1	2	1	4	0	3	2	4	1	3	1	2	3	1	1	1	2	3
HOM003340	1	1	1	2	1	2	1	3	1	1	1	2	1	5	0	1	1	1	2	3
HOM003355	2	2	3	1	1	5	1	2	2	1	3	2	1	3	2	1	1	3	3	5
HOM003370	1	1	1	3	1	1	1	1	1	2	1	1	1	1	2	1	1	3	1	3
HOM003376	1	1	1	1	1	3	3	2	3	2	1	2	2	1	2	1	1	1	2	3
HOM003379	2	2	2	1	1	2	2	2	1	0	2	2	1	2	0	1	2	3	2	3
HOM003383	1	1	1	1	1	2	3	6	1	1	1	1	2	1	2	1	1	1	1	2
HOM003394	2	2	1	1	1	2	1	2	1	0	1	1	1	3	1	1	1	2	3	4
HOM003395	3	2	1	2	1	2	3	4	2	1	1	1	1	1	1	1	1	2	7	12
HOM003398	2	1	2	1	1	2	3	2	1	1	2	1	1	2	1	2	3	3	3	4
HOM003425	2	1	1	1	1	2	3	5	1	0	1	2	1	1	1	2	4	2	2	3
HOM003443	3	2	1	1	1	2	2	8	3	0	1	3	1	1	0	1	2	2	5	7
HOM003472	2	1	1	0	1	2	5	2	1	1	0	2	1	3	2	1	3	3	7	9
HOM003478	3	2	1	1	2	3	2	2	2	5	1	3	2	1	0	2	2	1	2	4
HOM003479	3	3	3	1	1	2	1	3	1	0	3	2	1	4	0	1	1	5	3	8
HOM003486	2	1	2	1	1	1	2	3	1	1	3	2	1	4	1	1	1	2	2	3
HOM003487	1	1	1	2	1	1	2	7	1	0	1	3	3	2	0	1	1	1	2	3
HOM003489	2	2	2	2	2	4	1	2	2	2	2	3	2	2	0	2	1	2	3	4
HOM003499	3	2	2	1	1	0	0	2	2	1	3	4	1	2	0	1	1	7	1	5
HOM003507	1	1	1	1	1	4	1	11	1	0	2	2	1	1	1	1	1	4	1	2
HOM003538	1	1	1	1	10	0	0	4	2	0	1	1	1	2	3	1	1	2	1	3
HOM003545	26	11	0	0	0	0	0	0	0	0	0	0	0	0	0	0	0	0	5	7
HOM003546	2	2	1	1	1	3	2	8	0	3	1	2	1	1	0	2	1	2	3	4
HOM003547	1	1	5	1	1	2	1	0	1	1	3	2	1	2	1	1	1	2	1	2
HOM003549	3	2	1	20	1	0	0	1	0	0	0	1	5	0	0	2	0	0	3	6
HOM003551	3	2	1	1	1	1	2	1	2	1	1	1	2	1	1	2	1	1	1	2
HOM003563	2	2	0	2	2	7	0	5	4	3	0	4	2	0	0	2	2	0	1	2
HOM003569	1	1	1	1	1	1	1	1	2	1	1	3	8	1	1	1	1	2	2	5
HOM003591	2	1	1	2	2	1	1	3	1	3	1	1	1	1	0	2	1	1	1	2
HOM003598	1	1	1	5	2	2	1	8	1	1	1	1	2	1	1	1	1	1	1	2
HOM003606	2	2	1	2	2	6	3	3	2	1	1	2	2	0	1	2	2	1	2	5
HOM003619	2	2	2	1	2	2	2	3	2	1	1	2	1	1	0	1	1	3	1	2
HOM003635	1	1	1	3	1	2	2	7	1	0	1	2	1	1	1	2	1	2	2	3
HOM003640	3	2	1	2	1	2	1	6	2	1	1	3	1	2	0	2	1	3	5	9
HOM003642	1	1	2	1	1	5	0	3	1	1	1	2	1	1	1	2	1	2	1	2
HOM003648	1	1	1	1	1	2	1	2	1	1	1	3	1	0	2	1	1	1	3	5
HOM003658	2	2	1	2	1	3	2	3	2	1	1	2	2	1	0	2	2	5	3	4
HOM003675	1	2	1	1	4	3	1	0	1	3	1	1	1	1	0	1	4	1	3	5
HOM003677	2	1	1	3	1	1	2	3	2	2	1	2	2	1	1	1	1	1	1	3
HOM003680	2	1	1	3	1	2	2	5	1	1	1	2	1	1	1	1	2	1	4	6
HOM003692	0	1	1	1	1	2	1	2	1	0	1	2	1	1	0	1	3	2	2	3
HOM003694	2	2	2	1	1	3	0	3	2	1	1	2	1	1	0	1	1	3	2	3
HOM003712	2	2	2	1	2	4	2	2	2	1	1	2	1	1	0	1	2	3	1	2
HOM003714	2	3	1	1	1	2	2	4	2	2	3	1	1	1	1	1	1	2	1	2
HOM003736	2	2	1	2	1	2	1	1	3	1	1	1	1	2	1	3	1	3	2	3
HOM003740	1	1	1	2	1	2	0	3	1	1	2	6	1	2	1	1	2	5	2	5
HOM003749	2	2	1	1	2	4	2	2	3	4	1	3	2	1	0	2	1	2	2	3
HOM003757	1	1	2	1	1	2	3	1	2	1	2	3	1	2	1	1	1	3	2	3
HOM003768	28	8	0	0	0	0	0	0	0	0	0	0	0	0	0	0	0	0	1	2
HOM003776	1	1	1	4	1	1	3	3	1	3	1	2	1	1	3	1	1	1	2	4
HOM003777	5	1	1	1	2	2	1	2	2	0	1	2	1	1	1	1	3	2	1	2
HOM003778	1	3	2	1	2	2	1	1	2	0	2	3	2	2	1	2	0	3	1	3
HOM003780	1	1	1	1	2	2	1	1	1	1	1	1	1	1	1	1	1	2	2	3
HOM003791	7	5	1	2	1	2	0	0	1	0	1	2	1	1	1	1	5	2	5	8
HOM003793	1	1	1	1	1	2	2	3	1	1	1	2	1	1	2	4	1	1	1	2
HOM003794	2	2	1	2	1	4	1	3	2	0	1	3	2	1	2	3	1	1	1	2
HOM003795	2	1	2	0	2	2	2	4	2	1	1	2	1	1	1	2	1	1	1	2
HOM003803	1	1	1	1	5	2	0	5	2	1	1	1	1	1	2	1	1	2	1	3
HOM003806	1	1	1	2	1	4	1	3	1	2	1	1	1	1	1	1	2	2	2	3
HOM003807	1	1	1	2	7	2	1	2	1	1	1	1	2	1	2	1	1	1	1	2
HOM003815	1	2	1	1	1	2	1	4	2	1	1	4	4	1	0	2	2	2	1	2
HOM003816	2	2	1	2	1	2	4	7	2	0	1	2	1	1	1	1	1	2	3	4
HOM003828	1	2	1	1	2	3	0	4	1	3	2	2	1	1	0	1	1	3	2	3
HOM003829	1	1	1	2	1	2	1	3	1	0	1	1	1	1	1	12	1	2	2	3
HOM003836	0	2	2	3	2	4	2	2	0	2	2	3	2	3	0	0	1	3	3	4
HOM003840	1	1	1	1	1	2	2	5	1	1	1	2	3	1	1	2	1	1	1	3
HOM003844	1	1	3	1	2	4	0	5	1	1	2	2	1	2	1	2	1	3	1	3
HOM003864	1	1	1	2	1	2	1	2	1	1	1	1	1	1	1	1	1	1	1	2
HOM003867	1	1	2	1	2	2	2	2	3	3	1	1	1	2	1	1	1	1	1	2
HOM003877	1	1	1	3	1	3	5	2	2	1	2	1	1	1	0	1	2	1	3	4
HOM003887	2	2	4	1	1	2	1	1	1	1	2	2	1	4	1	1	1	2	3	4
HOM003888	6	3	1	4	1	1	0	1	1	1	1	1	1	2	0	1	1	1	10	11
HOM003896	1	1	2	1	3	1	1	1	2	3	4	2	1	2	0	1	1	2	1	2
HOM003899	1	1	1	1	2	3	1	4	1	4	1	1	1	1	0	1	2	1	4	6
HOM003902	2	3	0	2	2	6	1	5	4	1	0	4	2	0	0	1	2	0	1	2
HOM003910	4	3	1	1	2	2	2	2	1	1	1	2	1	2	1	1	0	2	2	4
HOM003923	2	2	1	1	1	3	3	3	4	1	1	4	2	1	0	1	2	2	3	4
HOM003925	3	1	1	1	1	2	2	3	1	2	1	2	1	2	1	1	5	2	2	3
HOM003929	1	1	2	1	1	2	1	2	1	1	2	1	1	2	2	1	1	2	1	3
HOM003934	1	1	1	4	1	2	4	2	1	2	1	2	1	1	1	1	1	1	4	7
HOM003941	1	1	1	3	1	2	1	1	1	2	1	4	3	1	0	1	1	2	2	3
HOM003943	1	1	1	1	1	4	0	2	2	7	1	1	2	1	0	3	2	2	1	2
HOM003950	1	1	1	1	1	1	1	7	2	2	1	1	1	1	1	1	1	1	3	4
HOM003951	2	2	1	2	1	2	3	2	1	1	1	2	1	1	1	1	1	1	3	4
HOM003953	2	2	1	1	1	2	1	4	2	2	1	6	1	1	2	2	1	1	2	3
HOM003963	1	1	1	1	1	3	2	6	1	4	1	3	1	1	0	1	2	1	2	3
HOM003971	1	1	2	1	0	6	4	2	1	2	2	1	0	5	0	1	1	1	1	2
HOM003975	1	1	1	2	1	2	1	3	2	1	1	1	1	1	2	1	3	1	1	3
HOM003984	1	1	1	1	1	2	2	6	1	1	2	2	1	1	1	1	1	1	1	2
HOM003988	1	1	1	4	1	1	3	5	1	1	1	1	1	1	0	1	1	3	5	8
HOM004017	0	1	4	1	1	5	0	2	3	0	3	2	1	2	0	1	1	4	3	4
HOM004033	1	1	1	1	2	2	2	1	1	1	1	1	2	1	0	2	2	1	1	2
HOM004034	2	2	1	2	2	4	0	4	2	0	1	3	3	1	0	2	2	1	1	2
HOM004035	4	3	1	1	1	2	1	3	1	3	1	1	1	4	1	1	1	1	4	5
HOM004048	1	1	1	1	1	2	2	4	1	1	2	2	1	4	0	1	1	3	2	5
HOM004049	1	1	1	1	1	2	1	3	1	0	1	3	1	1	2	1	1	1	1	2
HOM004058	3	2	1	2	1	3	2	3	2	1	1	2	1	1	0	1	1	2	4	5
HOM004070	1	2	1	1	1	1	1	1	1	3	1	2	1	6	0	1	1	2	2	4
HOM004096	3	3	1	1	0	6	1	1	4	0	1	5	1	1	0	2	2	1	1	2
HOM004098	2	1	1	2	1	2	3	5	1	0	1	1	1	0	1	1	1	1	2	7
HOM004100	4	2	1	2	1	2	1	3	4	1	1	4	1	1	0	1	1	2	2	3
HOM004110	3	2	4	1	1	2	0	2	1	0	2	4	1	2	0	2	1	4	1	2
HOM004111	1	1	1	3	2	2	1	2	2	0	1	2	1	1	1	1	1	2	2	7
HOM004113	2	2	1	1	1	2	2	3	1	1	1	2	1	2	1	1	1	1	4	5
HOM004114	2	1	1	1	1	2	1	3	1	2	1	2	1	1	1	1	2	1	1	2
HOM004137	6	1	1	3	2	2	1	1	1	0	1	2	1	1	1	1	1	2	2	3
HOM004140	1	1	1	2	1	5	0	1	2	2	1	1	1	1	1	1	2	2	2	4
HOM004141	1	2	1	3	1	2	2	2	1	0	1	2	1	1	2	1	1	2	2	3
HOM004151	1	1	1	1	1	1	3	1	3	1	1	1	2	1	3	1	1	2	4	6
HOM004186	1	1	1	1	1	2	1	6	1	1	1	2	2	1	0	1	2	1	3	4
HOM004195	1	1	1	2	1	2	0	6	2	0	1	2	1	1	0	1	2	1	3	4
HOM004199	1	1	1	1	1	2	1	3	1	1	1	1	1	2	0	1	1	2	4	6
HOM004209	1	2	1	4	1	2	0	3	1	1	3	1	1	1	1	1	2	2	6	8
HOM004213	1	1	1	1	1	2	1	3	2	1	1	1	1	1	1	7	1	3	1	3
HOM004220	1	1	1	1	1	3	1	6	1	1	1	1	2	1	1	1	1	1	1	2
HOM004224	4	2	4	1	2	0	3	1	2	1	1	2	1	1	2	1	1	1	4	6
HOM004237	3	2	1	1	1	4	0	0	1	1	1	2	1	1	0	1	1	2	5	7
HOM004241	4	4	1	1	1	4	1	1	2	0	1	5	2	1	0	1	2	1	1	2
HOM004257	2	1	2	1	1	2	2	2	1	2	1	2	1	2	0	1	1	1	2	3
HOM004261	0	1	2	1	1	3	2	0	4	1	2	4	2	3	0	1	1	3	1	2
HOM004265	2	1	1	1	2	1	0	2	2	1	1	1	2	1	1	1	5	1	2	3
HOM004274	3	2	2	1	2	2	1	2	1	1	2	2	1	1	1	1	1	3	5	7
HOM004277	2	2	1	1	1	2	8	3	1	1	1	1	1	1	1	1	1	1	1	3
HOM004278	1	1	1	1	1	2	4	3	2	3	1	1	1	0	1	1	1	2	1	4
HOM004280	1	1	1	1	2	2	1	4	1	0	1	1	2	1	0	1	1	2	1	2
HOM004281	4	4	1	1	1	6	0	1	1	1	1	1	2	1	3	1	1	1	3	4
HOM004294	1	1	1	2	2	3	2	4	1	1	1	2	1	2	0	1	1	2	2	4
HOM004301	1	1	2	2	1	2	0	0	1	1	1	2	1	1	3	1	3	2	1	2
HOM004303	1	1	1	2	1	2	2	2	3	1	1	1	1	3	1	1	0	1	5	6
HOM004314	0	1	3	1	2	1	0	4	1	3	3	2	1	5	0	1	2	1	2	3
HOM004316	2	2	2	1	1	3	0	3	1	3	1	3	1	1	0	2	1	4	2	5
HOM004319	2	2	1	1	2	2	2	2	3	0	1	2	1	1	1	1	1	4	3	4
HOM004320	2	2	1	1	2	4	0	1	3	1	1	1	1	2	1	2	1	1	3	4
HOM004323	1	1	1	1	1	2	1	4	1	1	1	2	2	1	1	1	2	1	2	5
HOM004328	2	1	1	1	1	2	2	1	1	0	2	1	1	1	2	2	1	1	1	2
HOM004329	1	2	1	1	1	4	2	4	1	1	1	1	1	1	3	1	1	1	1	3
HOM004333	1	1	3	1	1	2	1	3	1	0	1	1	1	3	1	1	1	2	1	4
HOM004343	2	2	1	1	1	2	1	3	3	1	1	3	3	1	0	1	1	4	3	4
HOM004346	2	2	1	1	1	3	0	1	2	2	1	2	1	1	1	1	2	1	3	5
HOM004368	3	2	1	1	2	0	0	9	1	0	1	6	1	0	0	1	1	2	1	2
HOM004374	1	1	1	2	2	1	1	2	2	1	1	1	1	1	2	3	1	1	2	3
HOM004392	3	3	1	2	3	2	2	3	2	3	1	1	1	1	0	1	1	0	1	2
HOM004395	1	1	1	1	1	2	1	4	1	1	1	2	1	2	1	1	2	1	1	2
HOM004396	1	1	2	1	2	1	0	4	1	0	2	1	1	0	3	1	1	1	1	2
HOM004410	1	1	1	1	1	1	1	3	1	0	2	1	1	1	1	1	6	1	2	3
HOM004415	2	2	1	2	1	2	1	1	2	0	2	1	1	1	1	1	1	1	3	5
HOM004424	1	1	2	1	2	1	0	1	1	7	2	1	1	2	1	1	1	3	1	2
HOM004429	1	1	1	1	1	2	1	3	1	2	1	1	1	1	1	1	2	1	4	5
HOM004437	1	1	1	4	2	2	1	2	1	1	2	2	1	1	1	1	2	1	2	4
HOM004472	1	1	1	6	1	3	2	1	2	0	0	1	1	1	0	2	3	1	11	24
HOM004489	1	1	1	1	1	2	2	1	1	7	1	1	1	0	0	1	1	1	2	3
HOM004493	2	2	1	1	1	2	1	2	2	1	1	2	1	0	1	1	1	1	3	4
HOM004495	3	1	1	2	1	1	1	1	1	1	1	1	2	1	1	1	1	1	3	7
HOM004500	1	1	1	1	1	3	0	2	1	2	1	1	1	0	1	1	1	5	2	4
HOM004506	2	2	1	1	1	5	2	2	2	2	1	2	1	1	1	1	1	1	2	4
HOM004507	1	1	1	0	1	1	1	2	1	2	1	2	1	1	1	1	2	3	2	3
HOM004509	1	1	1	1	1	4	2	5	2	2	1	2	1	0	1	1	1	2	1	3
HOM004526	1	1	2	3	1	3	3	1	1	1	1	1	1	2	0	1	2	1	2	4
HOM004527	1	1	1	1	1	2	2	3	1	1	1	1	1	1	1	1	2	2	3	5
HOM004536	1	1	2	1	1	2	0	5	2	1	2	1	1	2	1	1	2	2	1	2
HOM004537	1	1	2	1	1	2	4	1	1	1	2	2	1	2	0	1	0	2	1	2
HOM004590	1	1	1	1	1	2	4	2	1	1	2	1	1	1	1	2	2	1	4	5
HOM004592	1	1	1	2	1	3	1	3	1	1	2	2	1	1	1	1	0	1	1	2
HOM004606	1	1	1	2	1	2	1	3	2	0	1	1	1	1	1	2	1	1	1	3
HOM004607	1	1	1	1	1	2	1	3	1	1	1	1	2	1	1	1	5	1	3	6
HOM004608	2	2	1	1	1	2	1	2	2	3	2	2	1	2	0	1	1	2	2	3
HOM004642	1	1	1	1	2	2	1	2	1	2	1	3	1	1	2	1	0	1	1	3
HOM004652	1	1	1	1	1	2	1	3	1	1	1	2	1	1	1	1	1	1	1	2
HOM004657	3	3	1	1	1	2	1	5	1	0	1	2	1	1	1	2	1	0	2	3
HOM004658	1	1	1	2	1	1	0	2	2	0	1	2	2	6	1	2	1	3	3	4
HOM004667	1	1	1	1	1	1	1	1	1	5	1	1	1	2	1	1	1	1	2	5
HOM004669	1	1	1	2	4	1	1	4	1	3	1	1	1	1	1	1	1	1	5	9
HOM004672	1	1	1	1	1	2	1	6	1	1	1	1	2	1	3	1	1	3	3	4
HOM004675	2	2	1	1	1	2	1	5	1	2	1	2	1	1	1	1	1	1	3	4
HOM004687	1	1	1	1	1	2	0	5	3	0	1	2	1	2	1	1	1	2	3	4
HOM004690	1	1	1	1	1	4	1	6	2	1	2	1	1	1	1	1	1	1	1	2
HOM004691	1	1	1	4	1	2	1	4	1	1	1	0	1	1	0	1	1	1	2	3
HOM004694	1	1	1	1	1	2	1	3	2	1	1	2	1	1	0	1	2	1	2	3
HOM004726	1	1	1	1	1	2	2	1	1	1	1	3	1	1	0	1	1	2	1	2
HOM004739	3	3	2	1	1	2	1	3	1	1	1	1	1	0	2	1	1	1	2	3
HOM004754	2	2	2	1	1	1	3	1	1	1	1	2	1	2	0	1	1	2	2	4
HOM004769	1	1	1	1	1	2	1	4	1	2	1	1	1	1	1	1	1	1	1	2
HOM004783	1	1	1	1	2	1	2	1	1	0	1	1	1	4	0	1	2	1	4	7
HOM004805	3	2	1	3	1	3	0	3	1	1	1	3	1	1	0	2	1	1	4	8
HOM004807	1	1	1	2	1	1	1	2	2	1	1	1	1	1	1	1	1	4	1	4
HOM004815	2	2	1	1	1	3	2	3	1	0	1	1	1	2	1	1	3	1	2	4
HOM004818	3	3	1	3	1	2	3	1	1	0	2	2	1	1	0	1	1	1	1	3
HOM004823	2	2	0	2	1	4	2	3	2	3	0	5	2	0	0	1	1	0	1	4
HOM004837	1	1	2	1	1	4	2	2	2	0	2	1	1	3	0	1	1	2	1	4
HOM004840	2	2	1	3	1	2	1	2	2	1	1	1	1	1	2	1	2	1	2	3
HOM004851	1	1	1	3	1	1	1	2	1	1	1	1	1	1	1	1	1	1	1	2
HOM004858	1	1	3	3	1	2	0	2	2	1	2	2	1	2	0	1	1	2	1	2
HOM004864	1	1	1	1	1	2	1	2	1	0	1	2	1	1	1	1	1	5	2	3
HOM004866	1	1	2	2	1	4	3	1	0	0	2	1	1	2	1	1	1	2	2	4
HOM004875	1	1	1	1	1	2	4	4	2	2	2	2	1	1	0	1	1	1	1	4
HOM004876	1	1	2	1	3	1	2	1	1	5	1	1	2	1	0	1	1	1	3	4
HOM004905	2	2	1	1	1	2	1	2	1	0	1	1	1	1	1	1	1	1	3	4
HOM004947	2	1	1	1	1	3	1	1	1	2	1	2	1	1	0	1	2	1	2	8
HOM004957	1	1	1	1	2	2	0	2	1	3	1	2	1	1	0	1	2	1	1	2
HOM004964	1	1	1	1	1	1	1	2	1	0	1	2	0	2	1	1	1	2	1	2
HOM004970	1	1	1	1	2	3	2	1	1	3	1	2	1	1	1	1	2	1	1	3
HOM004972	1	1	1	1	1	2	3	3	1	0	1	2	1	1	2	1	1	0	1	2
HOM004978	1	1	1	1	3	1	1	4	1	2	1	3	1	1	1	1	1	1	2	4
HOM004999	1	1	1	2	1	3	2	2	2	0	1	4	1	1	1	1	1	2	1	2
HOM005022	1	1	1	1	1	1	1	2	1	0	1	2	1	1	1	1	1	2	1	2
HOM005038	1	1	1	2	1	2	2	1	2	2	1	1	1	2	1	1	1	3	2	3
HOM005039	1	1	1	1	1	2	1	6	1	0	1	2	1	1	1	1	2	1	3	4
HOM005057	1	1	1	1	1	3	0	2	1	2	1	2	1	0	1	1	1	1	1	4
HOM005070	3	2	1	1	1	5	1	1	1	0	1	2	1	1	1	1	1	1	2	3
HOM005076	3	1	1	1	1	2	0	3	1	1	1	1	1	1	1	1	1	1	3	4
HOM005078	1	1	1	1	1	1	3	1	2	0	1	1	1	1	3	1	1	1	5	7
HOM005105	6	2	1	1	2	2	1	1	1	2	1	1	1	1	1	1	1	0	1	2
HOM005127	4	1	1	1	0	2	0	2	1	0	2	1	1	2	1	1	1	1	2	3
HOM005131	1	1	1	0	2	2	1	2	1	0	1	2	1	0	1	1	1	3	1	2
HOM005133	1	1	1	1	1	2	0	4	2	1	1	2	1	1	0	1	1	2	2	3
HOM005141	1	1	1	1	1	2	2	2	1	1	1	1	1	0	1	1	1	3	1	2
HOM005153	2	2	1	0	3	2	1	3	1	1	2	2	1	0	0	1	1	1	2	3
HOM005154	1	1	1	1	1	2	0	0	1	3	1	1	1	1	1	2	8	0	1	2
HOM005177	1	1	2	1	1	2	1	3	2	2	1	2	1	2	0	1	1	3	3	4
HOM005184	2	3	0	0	0	0	5	3	0	1	1	0	2	1	0	1	3	2	2	3
HOM005186	1	1	1	1	0	2	1	2	1	1	1	1	1	1	2	1	1	1	1	3
HOM005190	2	2	1	1	1	1	1	4	2	0	1	1	1	1	1	1	1	1	1	3
HOM005200	1	1	1	1	1	1	1	1	1	1	1	1	1	1	1	1	1	4	1	3
HOM005212	1	1	2	1	1	2	1	3	1	0	1	2	1	1	0	1	5	1	2	3
HOM005213	2	1	3	1	1	0	2	1	1	0	2	1	1	2	1	1	1	1	1	2
HOM005232	2	1	2	2	1	2	0	1	1	0	3	2	1	2	1	2	1	2	1	2
HOM005247	1	1	1	1	1	2	2	1	1	0	1	1	1	1	1	1	1	1	3	4
HOM005267	0	1	1	2	1	0	4	3	1	0	1	1	2	1	0	3	2	1	3	5
HOM005268	1	1	1	1	1	2	0	4	2	0	1	2	1	1	1	1	1	1	1	2
HOM005271	1	1	1	2	1	1	2	1	1	0	1	1	1	2	1	1	1	1	5	7
HOM005281	1	1	1	1	2	3	1	2	1	2	1	3	1	1	1	1	1	1	2	3
HOM005286	1	1	1	2	1	2	1	3	1	0	1	2	1	1	0	1	1	1	3	4
HOM005300	4	1	1	1	1	2	1	0	2	1	1	1	1	1	1	2	1	1	2	3
HOM005308	6	17	0	0	0	0	0	0	0	0	0	4	0	0	0	0	0	0	7	8
HOM005372	4	1	1	1	1	1	1	2	1	0	1	1	3	1	1	1	1	1	1	2
HOM005373	1	1	1	1	1	2	1	3	1	0	1	2	1	1	1	1	1	1	3	5
HOM005389	1	1	1	1	2	1	1	2	1	0	1	2	1	1	1	1	1	1	1	2
HOM005390	2	1	1	1	1	1	1	3	1	1	1	2	1	1	0	1	1	1	1	2
HOM005392	1	1	1	1	1	2	2	2	1	1	1	2	1	1	0	1	1	1	1	4
HOM005394	1	1	2	1	1	2	1	3	1	2	1	1	1	1	2	1	1	2	2	3
HOM005405	1	1	1	1	1	2	1	4	2	1	1	2	1	1	0	1	1	2	3	7
HOM005418	2	2	2	1	1	1	1	1	1	2	1	2	1	1	1	1	2	2	3	5
HOM005429	1	1	1	1	1	2	1	2	1	1	1	1	1	0	0	1	1	2	1	2
HOM005438	1	1	1	1	1	1	2	3	1	1	1	2	1	1	1	1	1	1	1	2
HOM005440	2	3	1	1	2	2	0	2	2	0	1	1	1	1	0	1	1	1	2	3
HOM005446	2	2	1	1	1	4	2	2	1	1	1	3	1	1	0	1	1	1	2	3
HOM005460	1	1	1	2	1	2	0	2	1	0	1	2	1	1	1	1	1	2	3	4
HOM005474	1	1	1	2	2	3	1	3	1	0	1	1	1	1	0	1	1	3	2	3
HOM005482	1	1	1	1	1	2	0	1	1	1	1	1	1	1	1	2	1	1	3	4
HOM005497	1	1	1	1	1	2	1	3	1	0	1	1	1	2	1	1	1	1	1	2
HOM005502	1	1	1	1	1	2	1	2	1	0	1	2	1	1	0	1	1	3	2	3
HOM005505	1	1	1	1	1	2	1	2	1	1	1	1	1	1	1	1	1	1	2	3
HOM005509	1	1	1	1	1	2	3	2	1	0	1	3	1	1	0	1	1	3	5	6
HOM005527	1	1	1	2	1	2	1	1	1	2	1	1	1	1	1	1	1	3	3	4
HOM005533	1	1	1	1	1	2	0	3	2	0	1	2	1	2	2	1	1	1	2	3
HOM005544	2	1	1	1	1	2	1	4	3	0	1	2	1	1	0	1	1	2	2	5
HOM005550	1	1	1	2	1	2	1	0	1	2	1	1	1	1	0	1	2	1	3	4
HOM005552	1	1	1	1	1	4	1	5	1	1	1	1	1	1	0	1	1	2	1	4
HOM005557	2	2	1	2	1	2	1	3	1	1	1	2	1	1	0	1	1	1	4	5
HOM005566	1	1	1	1	1	2	2	1	1	0	1	1	1	1	0	1	2	2	1	2
HOM005570	2	1	1	2	1	2	2	2	1	1	1	1	1	1	0	1	1	1	1	2
HOM005586	1	1	1	1	1	1	2	3	1	0	1	1	1	1	2	1	1	1	2	3
HOM005589	1	1	1	1	2	2	1	3	1	2	1	1	1	1	0	1	2	1	1	2
HOM005590	1	1	1	1	1	3	1	1	1	4	1	2	0	1	1	1	1	1	1	2
HOM005603	1	1	1	1	1	2	1	3	1	0	1	1	1	1	0	1	1	1	1	2
HOM005638	1	1	1	1	1	2	0	4	2	2	1	2	1	1	0	1	1	2	1	2
HOM005640	1	1	1	1	0	1	2	1	1	1	1	1	1	2	1	1	1	1	1	2
HOM005641	1	1	1	2	1	1	2	1	2	1	3	1	1	1	1	1	1	1	2	3
HOM005686	3	1	1	1	1	2	0	2	1	2	1	1	1	1	0	1	1	1	1	2
HOM005704	1	1	0	2	1	2	0	10	2	0	0	2	2	0	0	1	1	0	4	6
HOM005716	1	1	1	1	1	1	1	2	1	1	1	1	1	1	1	2	1	1	2	4
HOM005739	20	4	0	0	0	0	0	0	0	0	0	0	0	0	0	0	0	1	1	2
HOM005748	2	2	1	1	1	2	1	5	1	1	1	1	1	1	0	1	1	1	4	5
HOM005774	8	5	0	1	1	1	0	2	1	0	0	2	1	0	0	1	2	0	1	2
HOM005843	1	1	1	1	1	1	2	1	1	2	1	3	1	1	0	1	1	2	2	4
HOM005844	1	1	1	1	1	1	2	2	1	1	1	1	0	1	1	1	1	3	1	2
HOM005854	1	1	1	1	1	1	1	1	1	1	1	1	1	1	3	1	1	1	1	3
HOM005868	1	1	2	1	1	2	2	0	1	1	1	1	1	1	0	1	1	1	3	4
HOM005889	13	11	0	0	0	0	0	0	0	0	0	0	0	0	0	0	0	0	1	2
HOM005902	1	1	2	1	1	2	0	2	1	1	1	1	1	1	1	1	1	2	2	3
HOM005913	1	1	1	2	0	2	1	2	1	0	1	1	1	3	1	1	1	1	1	6
HOM005921	2	1	1	1	1	2	1	3	1	2	1	1	1	1	2	1	1	0	1	2
HOM005924	1	1	1	1	2	1	0	0	1	1	1	2	1	1	1	1	1	1	1	2
HOM005931	1	1	1	1	1	2	1	1	1	1	1	1	1	1	1	1	1	1	1	2
HOM005941	1	1	1	1	2	1	0	2	2	1	1	1	1	1	0	1	4	1	3	8
HOM005949	1	1	1	1	1	2	1	1	2	1	1	1	2	1	1	1	1	1	1	2
HOM005955	1	1	1	1	1	2	1	3	2	1	1	1	1	2	0	1	1	2	3	5
HOM005959	21	3	0	0	0	0	0	0	0	0	0	0	0	0	0	0	0	0	3	4
HOM005986	1	1	1	0	2	2	1	1	1	1	1	3	1	1	2	1	1	1	1	2
HOM005995	2	1	2	1	1	2	0	1	1	1	1	1	1	1	1	1	1	2	1	3
HOM006020	1	1	1	1	1	2	1	1	1	1	2	1	1	1	1	1	1	1	1	2
HOM006029	1	1	1	2	1	3	1	2	1	1	1	1	1	1	1	1	1	1	2	4
HOM006031	2	1	1	1	1	2	1	3	1	0	1	1	1	1	1	1	1	1	2	3
HOM006036	2	1	1	1	1	2	1	1	1	0	1	2	1	1	1	1	1	2	1	2
HOM006037	1	1	1	1	2	2	2	1	2	0	1	1	1	1	0	1	1	1	1	2
HOM006047	1	1	0	1	1	2	1	1	1	3	1	2	1	1	0	1	1	1	1	2
HOM006064	1	1	1	3	1	2	0	3	1	1	1	2	1	1	1	0	1	1	1	5
HOM006069	1	1	1	2	1	1	1	1	1	2	1	1	1	0	1	1	2	1	3	5
HOM006073	1	1	0	1	1	2	0	7	2	1	0	2	1	0	1	1	1	0	1	2
HOM006074	1	1	1	0	3	2	1	1	2	1	1	1	1	1	2	1	1	1	2	3
HOM006075	1	1	1	1	1	2	1	2	1	0	2	1	1	0	1	3	1	1	2	3
HOM006084	0	1	1	1	1	3	1	2	1	1	1	1	1	1	0	1	2	1	2	4
HOM006103	1	1	1	2	2	1	1	1	1	0	1	1	1	1	1	1	2	2	3	4
HOM006107	1	1	0	2	1	2	2	3	2	1	0	3	1	0	1	1	1	0	3	4
HOM006122	2	1	1	1	1	2	1	2	1	1	1	2	1	1	0	1	1	1	2	4
HOM006124	1	1	1	1	1	2	1	2	2	1	1	2	1	1	0	1	1	1	1	3
HOM006125	1	1	1	1	1	1	0	3	1	1	1	1	1	1	1	1	2	1	1	4
HOM006131	10	13	0	0	0	0	0	0	0	0	0	0	0	0	0	0	0	0	3	5
HOM006140	1	1	1	1	1	4	1	0	1	2	1	2	1	1	1	1	1	1	1	2
HOM006145	2	2	0	2	3	2	1	2	2	1	0	2	1	0	0	2	1	0	1	2
HOM006184	1	1	1	2	1	2	1	1	1	1	1	2	0	1	1	1	1	2	5	9
HOM006194	1	1	1	1	1	1	0	1	1	0	1	1	1	1	1	1	2	1	1	2
HOM006196	2	1	1	0	1	2	0	1	1	1	1	2	1	1	0	0	1	1	1	2
HOM006203	1	1	1	1	1	1	0	2	1	1	1	2	1	1	0	1	2	1	3	4
HOM006208	2	1	1	2	1	0	0	1	2	0	1	1	1	1	0	1	3	2	1	3
HOM006211	1	1	0	1	2	2	1	3	1	3	0	3	1	0	0	1	2	0	3	4
HOM006221	1	1	1	2	1	1	1	1	1	1	1	1	1	1	1	1	1	1	2	6
HOM006225	1	1	1	1	1	1	1	1	3	0	1	2	1	1	1	1	1	1	2	3
HOM006236	1	1	1	1	1	2	0	1	1	1	1	2	1	1	2	1	1	1	3	4
HOM006238	1	1	1	1	1	2	1	2	1	1	1	1	1	1	0	1	1	3	1	2
HOM006249	14	8	0	0	0	0	0	0	0	0	0	0	0	0	0	0	0	0	3	6
HOM006255	1	1	1	0	4	1	0	1	2	1	1	1	2	1	0	1	1	1	3	4
HOM006257	1	1	1	1	1	3	0	1	1	0	1	2	1	1	1	1	1	1	1	2
HOM006261	3	18	0	0	0	1	0	0	0	0	0	0	0	0	0	0	0	0	1	3
HOM006269	1	1	1	1	1	3	1	2	1	1	1	1	1	1	0	1	2	1	1	3
HOM006273	1	1	1	1	1	2	2	1	1	0	1	1	1	1	1	1	1	1	2	3
HOM006276	0	1	1	1	0	1	1	2	1	3	1	1	1	0	0	1	1	1	1	2
HOM006289	1	1	0	1	1	2	1	3	3	0	0	4	1	0	0	2	2	0	2	4
HOM006293	1	1	2	2	1	2	0	0	1	2	1	2	0	2	0	1	1	1	2	4
HOM006300	5	2	0	1	1	2	1	3	2	1	0	2	1	0	0	1	0	0	2	4
HOM006316	2	2	0	1	1	4	1	2	2	1	0	2	1	0	1	1	1	0	1	3
HOM006327	2	2	0	1	1	4	1	2	2	2	0	2	1	0	0	1	1	0	4	6
HOM006335	1	1	1	1	1	1	2	1	1	1	1	2	1	1	0	1	1	1	2	3
HOM006342	2	2	0	1	2	2	2	2	1	3	0	2	1	0	0	1	1	0	2	4
HOM006346	1	1	1	1	1	1	1	1	1	1	1	1	1	1	1	1	1	3	3	5
HOM006355	1	1	0	1	2	1	1	0	1	2	1	1	1	1	0	2	1	3	1	2
HOM006364	2	2	0	0	1	4	2	2	2	1	0	3	1	0	0	2	0	0	1	2
HOM006367	1	1	1	0	2	2	1	1	1	1	1	1	1	1	1	1	1	1	2	5
HOM006375	1	1	1	1	1	1	1	1	1	1	1	1	1	1	1	1	1	1	2	3
HOM006386	1	1	1	1	1	2	0	1	2	1	1	2	1	1	0	1	1	1	1	3
HOM006387	1	1	1	1	1	2	1	1	1	1	1	1	1	1	0	1	2	1	2	4
HOM006389	1	1	1	1	1	2	2	0	1	1	1	1	1	1	0	1	1	2	1	4
HOM006410	1	1	0	1	1	1	1	1	1	2	0	1	2	0	1	1	1	0	2	3
HOM006414	1	1	1	1	0	3	0	1	2	1	1	1	0	1	0	1	1	1	1	2
HOM006416	1	1	0	2	3	0	0	7	1	0	0	3	1	0	0	2	0	0	1	2
HOM006432	2	2	0	0	1	2	1	3	2	0	0	2	2	0	0	2	2	0	1	2
HOM006444	2	2	0	1	0	4	1	4	2	0	0	2	1	0	0	1	1	0	2	3
HOM006457	1	1	2	1	1	2	1	2	1	0	1	1	1	1	1	1	1	1	1	2
HOM006467	1	1	1	1	1	2	1	0	1	0	1	2	1	1	1	1	2	1	4	11
HOM006470	3	2	0	1	1	5	1	2	1	2	0	1	1	0	0	1	0	0	1	2
HOM006483	1	1	1	1	1	2	1	2	2	0	1	2	1	1	0	1	1	1	1	3
HOM006499	1	1	1	1	1	1	1	2	1	0	1	2	1	1	1	1	1	1	2	3
HOM006526	1	1	0	0	1	2	2	4	1	2	0	0	1	0	0	1	1	0	2	3
HOM006546	1	1	1	1	1	2	1	2	1	1	1	1	1	1	1	1	1	1	2	3
HOM006554	13	7	0	0	0	0	0	0	0	0	0	0	0	0	0	0	0	0	3	5
HOM006573	1	1	0	2	1	1	1	1	2	1	0	0	3	0	1	1	1	0	1	2
HOM006578	1	1	0	2	1	2	1	7	1	0	0	1	1	0	0	1	1	0	1	2
HOM006588	1	1	0	1	1	2	1	0	2	1	0	1	1	0	1	2	1	0	2	3
HOM006637	1	1	1	1	1	3	0	2	2	0	1	2	1	1	0	1	0	1	1	2
HOM006675	1	1	1	0	1	2	1	1	1	1	1	1	1	1	0	1	1	1	1	2
HOM006696	1	1	1	1	1	2	0	1	3	1	1	1	1	0	1	1	1	0	1	4
HOM006759	2	2	0	1	1	2	0	3	2	0	0	3	1	0	0	1	1	0	2	3
HOM006762	1	1	1	2	0	2	0	0	1	1	1	1	1	1	2	1	1	1	2	3
HOM006768	2	2	1	1	1	2	0	1	1	1	1	2	0	1	0	0	1	1	1	2
HOM006776	1	1	0	1	0	2	2	3	1	2	0	3	1	0	0	1	1	0	2	3
HOM006787	1	1	1	1	1	2	0	0	1	0	1	1	1	0	0	2	1	2	1	2
HOM006806	2	2	0	1	1	2	1	3	2	1	0	2	1	0	0	1	0	0	1	2
HOM006832	2	2	0	1	1	0	0	3	2	0	0	3	1	0	0	1	2	0	3	4
HOM006877	1	1	1	1	1	2	1	1	1	0	1	1	1	0	0	1	1	1	2	3
HOM006906	1	1	1	1	3	0	5	4	0	0	0	0	0	0	0	1	1	0	1	4
HOM006910	1	2	0	1	1	2	2	3	2	0	0	1	1	0	0	1	1	0	4	5
HOM006920	1	1	1	1	1	2	0	0	1	0	1	1	2	1	1	1	1	1	1	2
HOM006926	1	1	1	1	1	2	0	1	1	0	1	1	1	1	1	1	1	0	2	3
HOM006934	7	6	0	0	0	0	2	0	0	1	0	1	0	0	0	0	0	0	3	4
HOM006943	1	1	0	1	2	2	1	2	1	0	0	2	1	0	0	1	1	0	2	3
HOM006979	1	1	0	1	1	4	0	0	1	4	0	2	1	0	0	1	0	0	1	3
HOM007020	2	2	0	1	1	2	0	0	2	1	0	2	1	0	0	1	2	0	6	7
HOM007059	2	2	0	1	1	2	1	1	2	1	0	2	1	0	0	1	0	0	3	4
HOM007134	1	1	1	1	1	1	1	0	1	0	1	1	1	1	1	0	1	0	1	2
HOM007136	0	1	1	1	1	2	0	0	0	2	1	1	1	1	0	1	1	1	2	4
HOM007152	1	1	0	1	1	2	1	2	1	0	0	1	1	0	1	1	1	0	2	3
HOM007172	1	1	0	1	1	1	1	1	1	0	1	2	1	1	1	1	1	0	1	2
HOM007175	1	1	0	1	1	4	1	2	1	1	0	1	1	0	0	1	0	0	1	3
HOM007183	1	1	0	1	1	2	0	2	2	0	0	2	1	0	1	1	1	0	1	2
HOM007207	11	4	0	0	0	0	0	0	0	0	0	0	0	0	0	0	0	0	2	3
HOM007209	9	6	0	0	0	0	0	0	0	0	0	0	0	0	0	0	0	0	1	3
HOM007223	1	1	0	1	2	0	0	3	2	0	0	2	1	0	0	1	1	0	2	3
HOM007302	1	1	1	1	1	0	0	1	1	0	1	1	1	1	0	1	1	1	2	6
HOM007309	2	2	0	0	0	3	2	0	1	1	0	2	1	0	0	0	1	0	1	2
HOM007322	1	1	0	1	2	2	1	1	1	0	0	2	1	0	0	1	1	0	2	3
HOM007339	2	2	0	1	1	2	0	2	1	0	0	2	1	0	0	1	0	0	1	2
HOM007415	1	1	0	1	1	2	1	1	2	0	0	1	1	0	0	1	1	0	1	2
HOM007442	1	1	1	0	0	0	0	2	1	0	1	1	1	1	0	0	1	1	1	2
HOM007482	1	1	1	0	1	1	1	0	1	0	1	1	1	1	0	1	1	1	1	2
HOM007522	11	2	0	0	0	0	0	0	0	0	0	0	0	0	0	0	0	0	4	5
HOM007574	1	1	0	1	1	1	1	1	1	1	0	1	1	0	0	1	1	0	2	5
HOM007764	5	4	0	0	0	0	0	0	1	0	0	1	0	0	0	1	0	0	1	3
HOM007852	1	1	0	0	0	1	1	0	1	2	0	1	1	0	0	1	1	0	1	2
HOM007882	3	3	0	1	0	0	0	0	2	0	0	0	1	0	0	1	0	0	2	3
HOM007956	8	2	0	0	0	0	0	0	0	0	0	0	0	0	0	0	0	0	1	2
HOM007961	6	5	0	0	0	0	0	0	0	0	0	0	0	0	0	0	0	0	6	8
HOM008135	2	1	0	1	2	0	0	0	1	0	0	1	0	0	0	2	0	0	1	2
HOM008169	4	2	0	0	0	1	0	0	2	0	0	0	1	0	0	0	0	0	2	3
HOM008224	4	6	0	0	0	0	0	0	0	0	0	0	0	0	0	0	0	0	3	4
HOM008584	1	1	0	1	1	0	0	0	1	0	0	1	1	0	0	1	1	0	1	2
HOM008586	4	5	0	0	0	0	0	0	0	0	0	0	0	0	0	0	0	0	4	8
HOM009613	4	3	0	0	0	0	0	0	0	0	0	0	0	0	0	0	0	0	1	3
HOM010129	1	1	0	0	1	0	0	0	0	0	0	1	0	0	0	1	1	0	1	2
HOM010163	3	3	0	0	0	0	0	0	0	0	0	0	0	0	0	0	0	0	3	9
HOM010648	1	1	0	1	0	0	0	0	0	1	0	0	0	0	0	2	0	0	1	2
HOM010790	2	2	0	0	0	0	1	0	0	0	0	0	0	0	0	0	0	0	1	3
HOM010901	3	2	0	0	0	0	0	0	0	0	0	0	0	0	0	0	0	0	2	3
HOM012134	2	2	0	0	0	0	0	0	0	0	0	0	0	0	0	0	1	0	1	5
HOM012182	2	3	0	0	0	0	0	0	0	0	0	0	0	0	0	0	0	0	1	2
HOM012313	2	2	0	0	0	0	0	0	0	0	0	0	0	0	0	0	0	0	1	2
HOM012446	2	2	0	0	0	0	0	0	0	0	0	0	0	0	0	0	0	0	1	4
HOM012884	2	2	0	0	0	0	0	0	0	0	0	0	0	0	0	0	0	0	2	3
HOM012975	2	2	0	0	0	0	0	0	0	0	0	0	0	0	0	0	0	0	1	3
HOM012990	2	2	0	0	0	0	0	0	0	0	0	0	0	0	0	0	0	0	2	3
HOM013350	2	2	0	0	0	0	0	0	0	0	0	0	0	0	0	0	0	0	1	2
HOM013729	2	2	0	0	0	0	0	0	0	0	0	0	0	0	0	0	0	0	4	6
HOM014040	2	2	0	0	0	0	0	0	0	0	0	0	0	0	0	0	0	0	1	2
HOM014829	2	1	0	0	0	0	0	0	0	0	0	0	0	0	0	0	0	0	2	3
HOM014984	1	2	0	0	0	0	0	0	0	0	0	0	0	0	0	0	0	0	2	6
HOM015239	2	1	0	0	0	0	0	0	0	0	0	0	0	0	0	0	0	0	1	2
HOM015413	1	2	0	0	0	0	0	0	0	0	0	0	0	0	0	0	0	0	3	4
HOM016158	1	2	0	0	0	0	0	0	0	0	0	0	0	0	0	0	0	0	2	3
HOM017056	1	1	0	0	0	0	0	0	0	0	0	0	0	0	0	1	0	0	2	3
HOM018149	1	2	0	0	0	0	0	0	0	0	0	0	0	0	0	0	0	0	1	2
HOM019313	1	1	0	0	0	0	0	0	0	0	0	0	0	0	0	0	0	0	2	6
HOM019314	1	1	0	0	0	0	0	0	0	0	0	0	0	0	0	0	0	0	2	4
HOM019322	1	1	0	0	0	0	0	0	0	0	0	0	0	0	0	0	0	0	2	4
HOM019418	1	1	0	0	0	0	0	0	0	0	0	0	0	0	0	0	0	0	1	2
HOM019428	1	1	0	0	0	0	0	0	0	0	0	0	0	0	0	0	0	0	3	4
HOM019457	1	1	0	0	0	0	0	0	0	0	0	0	0	0	0	0	0	0	1	2
HOM019538	1	1	0	0	0	0	0	0	0	0	0	0	0	0	0	0	0	0	2	3
HOM019658	1	1	0	0	0	0	0	0	0	0	0	0	0	0	0	0	0	0	1	2
HOM019962	1	1	0	0	0	0	0	0	0	0	0	0	0	0	0	0	0	0	3	4
HOM020344	1	1	0	0	0	0	0	0	0	0	0	0	0	0	0	0	0	0	1	2
HOM020610	1	1	0	0	0	0	0	0	0	0	0	0	0	0	0	0	0	0	1	2
HOM020659	1	1	0	0	0	0	0	0	0	0	0	0	0	0	0	0	0	0	2	3
HOM020831	1	1	0	0	0	0	0	0	0	0	0	0	0	0	0	0	0	0	3	4
HOM020865	1	1	0	0	0	0	0	0	0	0	0	0	0	0	0	0	0	0	3	4
HOM022025	1	1	0	0	0	0	0	0	0	0	0	0	0	0	0	0	0	0	1	2
HOM023043	0	2	0	0	0	0	0	0	0	0	0	0	0	0	0	0	0	0	2	7
HOM023833	1	1	0	0	0	0	0	0	0	0	0	0	0	0	0	0	0	0	1	2
HOM023897	1	1	0	0	0	0	0	0	0	0	0	0	0	0	0	0	0	0	1	2
HOM023900	0	2	0	0	0	0	0	0	0	0	0	0	0	0	0	0	0	0	3	15
HOM024624	1	1	0	0	0	0	0	0	0	0	0	0	0	0	0	0	0	0	1	4
HOM025112	1	1	0	0	0	0	0	0	0	0	0	0	0	0	0	0	0	0	1	2
HOM025966	1	1	0	0	0	0	0	0	0	0	0	0	0	0	0	0	0	0	1	2
HOM025997	1	1	0	0	0	0	0	0	0	0	0	0	0	0	0	0	0	0	1	2
HOM026000	0	2	0	0	0	0	0	0	0	0	0	0	0	0	0	0	0	0	2	3
HOM027672	1	1	0	0	0	0	0	0	0	0	0	0	0	0	0	0	0	0	2	4
HOM028140	1	1	0	0	0	0	0	0	0	0	0	0	0	0	0	0	0	0	2	3
HOM028150	1	1	0	0	0	0	0	0	0	0	0	0	0	0	0	0	0	0	1	2
HOM030965	1	1	0	0	0	0	0	0	0	0	0	0	0	0	0	0	0	0	1	2
HOM031414	1	1	0	0	0	0	0	0	0	0	0	0	0	0	0	0	0	0	1	2
HOM050683	0	1	0	0	0	0	0	0	0	0	0	0	0	0	0	0	0	0	6	29
HOM092158	0	1	0	0	0	0	0	0	0	0	0	0	0	0	0	0	0	0	2	3
HOM094246	0	1	0	0	0	0	0	0	0	0	0	0	0	0	0	0	0	0	1	2
HOM109445	0	1	0	0	0	0	0	0	0	0	0	0	0	0	0	0	0	0	1	2
HOM114517	0	1	0	0	0	0	0	0	0	0	0	0	0	0	0	0	0	0	8	20

## Sheet: s.rexii_all.families
	AL	AT	BD	CP	FV	GM	LJ	MD	ME	MT	OS	PT	RC	SB	TC	VV	ZM	Sr_reclustering	Sr_oases			AL	AT	BD	CP	FV	GM	LJ	MD	ME	MT	OS	PT	RC	SB	TC	VV	ZM
HOM000001	265	242	277	354	290	490	251	746	304	274	293	313	292	270	309	315	272	260	204		Sr_reclustering	0.838355	0.850173	0.854823	0.902698	0.785191	0.888553	0.849746	0.76703	0.888651	0.611416	0.777598	0.774264	0.886342	0.722776	0.808336	0.823598	0.880357
HOM000002	156	122	202	123	230	317	167	760	232	300	307	359	187	256	282	209	191	143	123		Sr_oases	0.748958	0.756904	0.752497	0.792382	0.697142	0.78277	0.762514	0.677933	0.791707	0.54169	0.683643	0.690905	0.781728	0.637542	0.719925	0.736208	0.784427
HOM000003	214	219	192	197	247	369	234	471	207	257	203	280	206	233	212	165	238	171	154
HOM000004	192	179	175	147	166	409	197	346	335	191	184	295	180	181	165	160	248	197	174		0.000289296
HOM000005	152	157	140	95	167	240	154	388	200	203	208	241	179	224	207	178	149	106	124
HOM000006	145	116	125	59	156	235	125	496	148	423	157	324	103	141	165	179	99	73	58
HOM000007	151	143	107	102	119	312	105	293	197	109	127	211	132	122	138	153	185	91	69
HOM000008	202	145	3	19	203	197	183	788	65	422	2	213	73	5	54	111	4	1	1
HOM000009	5	4	91	30	90	106	57	500	132	282	225	184	75	159	123	172	59	3	2
HOM000010	119	117	108	76	97	298	125	199	159	110	122	172	92	127	96	77	175	71	56
HOM000011	97	90	85	71	135	221	131	263	130	147	94	157	107	102	116	142	87	60	62
HOM000012	74	74	142	57	67	185	99	168	104	105	149	117	75	148	80	76	144	36	30
HOM000013	109	111	129	63	73	198	76	168	115	98	148	113	75	158	95	40	170	64	45
HOM000014	106	98	90	62	68	185	79	172	110	76	97	115	64	89	64	64	130	88	81
HOM000015	14	21	83	37	53	120	58	301	90	136	158	162	71	96	115	68	84	29	33
HOM000016	60	60	99	45	98	159	80	183	84	151	136	149	70	141	102	58	104	56	40
HOM000017	80	94	86	57	82	169	83	208	96	75	118	121	69	81	109	72	73	54	49
HOM000018	102	96	75	61	84	159	92	188	113	67	94	141	79	88	85	68	117	48	37
HOM000019	62	73	80	59	59	145	91	152	76	70	84	96	60	81	48	58	133	73	88
HOM000020	96	69	72	68	69	141	88	204	85	108	77	97	85	75	68	96	74	39	28
HOM000021	110	95	83	63	80	150	61	170	90	76	86	125	61	75	66	58	94	43	36
HOM000022	31	47	34	13	88	199	46	322	117	140	70	168	52	42	179	84	18	7	2
HOM000023	65	55	72	39	97	105	48	246	87	83	96	133	71	91	72	83	80	45	31
HOM000024	25	20	185	10	45	70	8	87	45	49	297	52	53	207	52	58	66	10	5
HOM000025	80	60	68	70	66	129	105	137	74	72	56	111	56	62	60	53	78	88	107
HOM000026	2	4	65	46	70	32	24	2	7	36	52	433	25	394	24	4	4	2	1
HOM000027	56	50	54	52	46	98	63	149	68	50	49	79	42	52	45	50	63	55	61
HOM000028	78	71	82	53	54	177	64	142	106	82	95	106	62	85	58	59	122	68	51
HOM000029	82	84	70	52	75	148	91	123	69	93	60	126	80	70	75	71	65	32	24
HOM000030	69	62	54	79	57	135	80	146	75	63	55	94	52	59	58	73	83	53	44
HOM000031	65	59	87	59	71	131	75	157	79	84	100	87	66	99	69	55	85	40	39
HOM000032	90	80	57	50	58	135	62	144	94	55	60	91	51	61	57	60	79	97	105
HOM000033	49	47	49	49	50	118	79	103	68	88	67	89	64	69	77	94	64	62	64
HOM000034	80	70	33	49	65	134	79	149	90	97	47	101	64	46	56	63	47	34	27
HOM000035	61	48	94	24	81	61	22	126	21	42	163	113	51	111	51	40	57	17	8
HOM000036	61	57	56	50	66	112	24	14	62	70	53	77	59	52	48	60	71	62	69
HOM000037	68	58	68	40	62	125	55	63	58	61	102	68	50	96	54	44	91	39	42
HOM000039	64	60	52	93	59	127	53	125	82	62	55	92	45	55	58	51	81	20	14
HOM000040	52	51	55	58	60	99	66	153	63	66	65	74	60	79	52	47	66	31	28
HOM000041	82	54	72	23	47	94	44	124	57	61	116	62	46	80	52	44	58	16	12
HOM000042	41	37	49	46	56	112	52	119	77	66	58	94	49	78	44	42	88	44	39
HOM000043	65	62	51	58	52	98	48	119	77	41	50	83	46	47	57	52	70	43	56
HOM000044	56	55	54	30	40	109	53	111	56	45	60	65	34	55	36	43	87	60	79
HOM000045	16	27	90	37	90	103	16	132	28	82	33	65	30	211	39	37	22	26	24
HOM000046	54	51	43	37	53	105	74	111	63	43	50	70	49	51	64	66	44	34	36
HOM000047	64	53	45	39	46	117	47	127	63	42	54	78	42	53	42	37	68	54	54
HOM000048	12	7	2	18	231	112	111	117	50	310	1	60	37	1	61	10	0	2	1
HOM000049	58	61	26	35	53	244	52	70	85	106	24	74	17	31	68	42	38	17	16
HOM000050	49	47	47	42	43	122	61	92	59	49	66	70	48	63	55	44	59	42	33
HOM000051	21	37	27	23	41	63	32	57	50	130	74	104	61	103	80	24	21	15	10
HOM000052	31	26	7	12	65	49	14	124	99	84	19	193	40	7	137	110	5	3	35
HOM000054	50	54	58	26	38	80	49	78	47	60	56	66	44	53	47	59	48	25	27
HOM000055	52	39	62	33	66	79	37	106	52	58	56	67	38	60	54	32	56	19	17
HOM000057	61	55	41	38	42	84	40	113	54	34	44	71	36	37	39	44	58	42	40
HOM000058	39	33	40	36	44	99	35	132	46	61	50	48	29	45	29	25	56	76	75
HOM000059	46	46	51	32	41	119	60	17	57	66	56	51	41	59	58	47	46	19	17
HOM000061	46	41	41	31	30	75	41	79	54	26	47	59	33	47	40	39	58	37	31
HOM000062	23	20	62	22	29	76	36	63	33	43	81	49	29	63	35	26	72	12	16
HOM000063	49	44	40	37	38	89	55	105	56	35	47	64	42	42	35	32	51	41	32
HOM000064	62	50	32	30	35	63	42	123	66	36	41	46	32	42	31	44	33	18	14
HOM000065	34	35	61	27	32	83	36	77	42	23	58	38	26	79	28	31	93	21	12
HOM000066	32	34	24	36	59	30	25	94	54	41	54	66	51	47	47	96	37	10	8
HOM000067	12	39	35	24	35	49	12	79	47	32	78	64	41	51	102	78	22	14	11
HOM000068	41	38	42	29	42	71	25	107	54	25	35	55	31	30	37	38	60	53	52
HOM000069	25	25	37	25	31	52	37	111	42	38	55	56	31	67	44	68	46	20	29
HOM000070	63	63	31	41	49	67	47	85	89	38	32	66	34	26	30	51	41	10	5
HOM000071	30	31	36	22	39	59	43	73	41	61	36	55	51	33	39	33	35	28	36
HOM000072	41	30	29	44	52	57	43	86	45	28	40	82	46	34	48	58	28	22	23
HOM000073	26	18	21	26	44	65	21	102	47	39	44	126	32	29	42	77	28	24	16
HOM000074	19	20	53	28	36	62	32	84	41	33	68	67	36	53	32	38	61	27	17
HOM000075	45	46	37	34	28	91	34	60	56	31	43	59	34	41	31	34	60	44	40
HOM000076	39	36	30	54	34	68	52	86	43	24	37	50	26	30	28	28	50	36	26
HOM000077	30	28	40	27	44	63	30	62	44	33	51	70	40	61	46	54	41	9	4
HOM000078	17	21	42	22	54	54	22	81	54	23	48	59	26	50	38	54	42	28	23
HOM000079	39	40	34	39	92	59	22	79	46	36	45	54	41	31	53	18	42	18	14
HOM000080	42	34	41	29	31	79	27	68	53	30	41	63	36	38	38	38	53	30	24
HOM000081	20	25	30	6	60	54	12	99	45	84	52	133	31	23	54	12	10	3	3
HOM000082	36	28	29	30	31	63	42	97	36	37	36	50	28	38	43	71	43	30	68
HOM000083	29	19	32	13	70	46	57	96	22	88	32	33	17	35	24	26	40	31	48
HOM000084	33	33	36	31	44	67	24	37	47	44	42	55	32	47	40	40	50	10	12
HOM000085	41	34	31	27	37	81	36	74	40	34	35	54	35	40	31	31	37	26	30
HOM000086	21	25	46	17	20	42	31	59	42	33	64	38	23	57	33	30	52	9	8
HOM000087	29	28	28	29	31	65	37	58	35	26	28	39	27	31	26	27	39	24	23
HOM000088	34	34	31	38	27	71	25	92	46	39	31	53	29	29	32	29	44	39	49
HOM000089	39	33	32	23	33	70	36	55	39	37	30	42	53	37	36	36	35	26	17
HOM000090	33	27	28	23	25	53	29	89	28	18	26	33	22	19	23	24	35	26	25
HOM000092	31	35	27	27	31	78	34	91	44	33	38	47	28	34	30	29	37	26	24
HOM000093	43	35	36	20	38	42	26	69	30	50	50	44	25	42	42	27	39	17	15
HOM000094	33	32	32	24	28	62	30	70	40	31	27	48	24	26	26	36	44	38	38
HOM000095	3	4	26	10	100	17	1	78	46	13	44	24	2	135	10	6	7	1	1
HOM000096	21	21	36	24	60	64	34	59	32	28	34	64	32	36	41	62	29	19	12
HOM000097	20	17	22	10	20	54	29	95	38	39	46	41	46	55	29	43	29	15	21
HOM000098	39	37	20	31	30	70	38	52	49	28	30	43	29	27	29	37	35	9	7
HOM000099	35	36	27	21	24	79	24	57	44	26	30	44	22	29	24	22	46	25	18
HOM000100	8	7	80	5	5	22	6	13	12	4	131	12	6	135	5	6	40	8	11
HOM000101	24	23	29	37	18	47	28	11	30	28	26	44	22	32	25	22	34	23	46
HOM000102	22	27	37	18	20	54	19	54	31	28	38	40	19	45	20	21	53	22	11
HOM000103	26	28	23	24	26	87	29	40	34	36	38	37	21	44	19	23	44	29	28
HOM000104	16	22	23	26	29	37	33	35	31	33	29	38	20	44	23	22	34	15	30
HOM000105	23	25	26	21	20	60	40	50	32	40	31	43	19	27	27	30	43	41	46
HOM000106	29	30	22	23	19	46	38	50	27	30	34	32	23	32	17	42	38	26	25
HOM000107	28	22	31	19	33	59	22	56	34	21	36	42	26	44	30	22	37	18	18
HOM000108	27	25	24	27	24	56	33	42	34	21	25	33	22	22	22	23	31	25	23
HOM000109	20	20	19	20	20	49	19	49	32	19	18	40	24	20	29	21	48	18	26
HOM000110	33	29	24	23	21	66	42	61	30	20	27	40	20	28	23	24	38	31	41
HOM000111	30	22	20	25	21	45	19	53	27	15	20	34	21	22	18	18	33	20	19
HOM000112	33	29	22	21	23	56	19	51	39	22	23	39	24	18	21	24	29	21	17
HOM000113	32	25	18	16	21	51	23	53	34	20	23	35	17	26	22	25	27	21	11
HOM000114	14	10	1	15	54	52	14	98	32	57	1	62	16	1	46	96	7	8	9
HOM000115	86	76	4	4	54	21	56	48	3	162	5	6	3	7	9	4	15	3	3
HOM000116	28	20	21	13	55	37	17	78	20	33	25	76	22	23	33	33	11	15	12
HOM000117	16	28	25	11	34	36	18	54	27	41	33	40	23	34	36	24	26	16	16
HOM000119	20	18	24	20	20	51	27	59	30	24	29	31	19	25	22	21	30	21	15
HOM000120	20	15	29	26	19	38	25	56	28	18	29	41	20	35	22	24	38	18	26
HOM000121	18	17	21	23	30	42	39	46	18	37	18	38	20	22	29	37	15	9	10
HOM000122	30	27	29	15	26	34	21	56	29	30	33	35	11	33	8	17	25	68	129
HOM000123	29	20	17	17	67	40	33	114	29	24	17	33	16	15	17	15	18	13	10
HOM000124	29	29	24	20	18	63	14	56	39	19	28	37	21	24	19	19	42	34	23
HOM000125	21	22	21	17	21	38	16	55	19	17	15	24	16	16	16	18	29	28	61
HOM000127	4	5	22	2	20	14	4	33	1	12	12	80	7	85	128	2	13	2	1
HOM000128	20	19	15	17	14	36	20	60	23	16	15	35	18	14	19	24	39	39	74
HOM000129	39	25	27	19	16	56	19	55	35	26	25	33	19	22	19	19	28	22	14
HOM000130	24	23	22	26	28	38	11	19	22	33	19	28	23	21	22	15	21	15	14
HOM000131	33	28	26	21	19	60	17	45	36	20	31	32	18	25	21	23	39	27	58
HOM000133	30	28	15	29	27	46	32	51	28	50	20	33	33	18	27	19	16	4	3
HOM000134	22	21	28	15	19	32	19	60	29	31	29	36	19	32	22	20	30	28	23
HOM000135	26	23	20	15	16	46	20	40	25	59	40	29	18	30	15	14	30	16	15
HOM000136	20	15	16	23	24	34	31	70	28	17	18	35	23	19	27	25	26	14	11
HOM000137	25	25	24	20	26	39	24	48	25	24	26	33	20	25	18	21	32	17	17
HOM000138	45	36	20	19	32	40	32	44	21	18	27	29	22	30	26	11	23	17	14
HOM000139	14	13	14	21	15	52	14	72	43	22	18	33	29	19	25	29	26	5	4
HOM000140	1	1	1	0	2	5	6	9	2	478	1	3	1	1	1	1	2	1	1
HOM000141	11	7	23	14	28	26	21	29	33	30	20	29	20	27	27	25	28	7	6
HOM000142	23	25	12	25	13	31	14	71	25	18	43	28	19	20	40	40	15	8	6
HOM000143	15	10	11	18	17	38	31	47	21	18	13	22	40	10	19	21	18	15	17
HOM000144	2	2	41	6	94	8	9	43	3	23	10	50	1	54	24	5	2	6	5
HOM000145	31	22	15	28	21	44	31	50	33	28	16	23	24	19	24	30	18	9	8
HOM000146	24	23	21	17	19	54	21	35	32	19	22	39	20	25	21	22	27	20	13
HOM000147	21	19	18	16	16	45	24	45	24	25	19	36	17	20	20	14	24	19	17
HOM000148	6	12	9	7	32	11	8	57	5	46	17	26	11	153	7	9	26	6	3
HOM000149	32	27	20	13	20	50	18	46	26	25	22	32	18	27	17	11	27	13	12
HOM000150	18	18	21	19	17	61	21	45	32	22	21	30	19	20	19	18	27	21	16
HOM000151	79	50	19	14	10	25	38	17	14	30	35	13	9	15	12	23	14	8	8
HOM000152	15	17	18	15	17	47	19	40	22	11	19	31	16	21	16	20	33	20	16
HOM000153	32	27	13	23	18	52	16	6	20	24	21	76	18	15	44	19	16	12	8
HOM000154	23	20	26	26	10	26	11	24	29	8	33	31	34	36	25	25	29	3	2
HOM000155	28	27	26	16	19	47	17	35	30	14	28	25	17	26	15	10	50	7	5
HOM000156	19	14	13	17	14	26	27	38	20	17	14	28	13	16	18	24	16	13	10
HOM000158	18	17	19	15	17	55	19	55	24	41	17	24	15	25	12	17	28	11	9
HOM000159	14	13	24	14	16	50	22	29	21	26	31	33	17	29	15	27	27	13	12
HOM000160	25	17	18	15	17	52	16	34	28	18	23	27	18	21	22	17	24	7	4
HOM000161	20	18	16	14	18	42	26	43	27	14	19	27	14	24	20	17	33	8	10
HOM000162	18	16	19	7	21	27	30	44	15	30	18	22	12	17	10	15	22	13	14
HOM000163	26	26	8	18	17	39	24	51	30	33	12	29	17	10	16	18	15	22	18
HOM000164	23	25	19	16	16	45	14	32	28	22	20	28	16	23	17	14	29	16	15
HOM000165	26	23	19	14	13	38	14	45	16	32	21	24	12	22	15	18	26	16	11
HOM000166	26	24	23	20	18	37	14	42	19	20	25	29	21	27	15	11	22	14	13
HOM000167	11	7	34	14	7	8	2	7	6	3	74	49	7	42	22	21	24	2	2
HOM000168	14	14	27	16	12	48	16	29	29	16	25	34	17	28	21	10	42	5	4
HOM000169	31	23	13	10	23	25	8	24	20	27	40	17	16	14	14	20	21	11	10
HOM000170	14	14	34	13	27	38	20	31	15	18	29	22	13	28	25	12	19	21	20
HOM000171	18	17	19	16	15	31	21	23	27	12	20	32	17	17	19	16	25	19	15
HOM000172	26	22	19	12	16	32	21	36	19	14	20	24	15	18	21	20	23	20	36
HOM000173	20	17	14	23	22	39	14	48	24	19	13	28	16	15	23	20	16	17	12
HOM000174	14	14	20	19	15	42	20	31	20	15	20	32	17	19	20	19	27	15	11
HOM000175	22	13	13	11	12	26	15	41	20	31	15	18	12	23	13	15	29	12	12
HOM000176	24	21	18	19	13	39	20	28	23	24	14	24	20	20	20	15	20	11	9
HOM000178	22	14	13	39	13	24	29	51	24	21	17	16	10	15	17	13	23	14	13
HOM000179	18	18	15	12	14	37	27	50	19	9	18	21	12	13	14	14	35	80	76
HOM000181	6	6	11	17	20	45	27	56	19	39	16	22	14	10	26	14	13	4	4
HOM000182	47	141	0	24	9	4	2	12	12	2	0	27	12	0	111	2	0	9	6
HOM000183	19	14	14	13	14	28	16	30	15	29	19	22	15	13	13	14	20	14	9
HOM000184	6	6	21	4	6	10	6	18	8	4	12	10	5	40	7	4	197	5	6
HOM000185	33	20	31	9	10	18	16	25	15	20	26	19	12	48	14	19	18	15	16
HOM000186	24	23	20	14	15	31	19	26	15	17	19	27	15	22	18	16	29	17	19
HOM000187	21	19	16	11	17	32	15	44	21	25	15	20	12	13	18	10	33	19	15
HOM000188	23	16	20	12	11	37	14	43	21	16	23	26	12	21	14	16	31	18	16
HOM000189	12	10	10	16	20	29	33	45	24	16	15	17	13	20	16	23	17	7	6
HOM000190	10	9	17	8	23	22	9	63	15	7	18	41	16	22	18	31	21	11	10
HOM000191	44	35	10	15	19	25	15	32	17	38	12	25	14	11	10	11	18	13	9
HOM000192	20	21	18	13	18	25	8	19	19	4	24	20	28	25	21	30	13	7	5
HOM000193	16	16	8	15	20	44	10	35	20	19	15	39	19	9	30	22	9	12	11
HOM000194	19	16	17	18	15	31	24	38	25	14	22	25	15	21	16	16	23	16	20
HOM000196	23	21	17	23	11	36	17	20	15	26	20	23	12	19	14	22	26	16	14
HOM000197	14	13	17	12	15	32	19	34	21	14	20	23	12	15	16	11	26	23	42
HOM000198	21	17	17	12	14	33	18	29	20	34	19	20	11	18	11	9	26	14	10
HOM000199	27	20	13	15	12	22	18	46	17	18	17	27	17	12	17	16	14	15	15
HOM000200	11	10	18	10	20	23	17	40	13	19	21	17	13	25	20	15	31	15	15
HOM000201	16	14	9	11	13	29	12	24	16	11	16	17	11	11	10	12	13	10	6
HOM000202	12	10	14	12	9	22	31	38	17	16	15	20	16	9	10	15	17	9	9
HOM000203	21	21	11	10	18	24	14	24	29	22	19	29	20	14	17	17	15	9	16
HOM000204	15	13	15	24	16	21	14	27	18	18	15	15	13	20	14	12	23	13	12
HOM000205	15	23	22	8	10	36	16	18	18	21	32	15	14	24	22	6	29	10	9
HOM000206	94	117	0	4	7	9	50	7	1	26	0	6	4	0	33	3	0	2	1
HOM000207	15	18	23	2	12	10	8	19	14	22	36	39	27	18	33	19	5	17	15
HOM000208	13	11	17	12	14	28	8	40	19	16	16	20	12	16	13	11	20	11	10
HOM000210	17	14	14	11	21	30	16	52	23	14	18	24	12	13	19	14	13	14	20
HOM000211	22	9	24	8	12	16	29	23	12	35	30	12	11	17	10	12	27	8	4
HOM000212	11	13	16	14	11	28	16	46	21	15	14	28	15	24	14	14	16	11	8
HOM000213	16	15	8	16	14	13	14	46	9	12	13	19	13	30	14	57	15	5	4
HOM000214	23	16	27	9	22	25	19	28	29	9	21	29	13	24	16	9	15	6	6
HOM000215	12	12	14	10	10	24	31	15	20	29	26	16	20	21	17	13	13	6	6
HOM000216	16	17	15	12	10	51	19	28	25	17	14	18	11	16	16	11	21	10	7
HOM000217	10	8	11	8	8	23	24	70	15	12	11	30	14	13	9	10	14	10	10
HOM000218	66	44	5	10	20	16	14	63	20	22	6	9	6	9	8	4	10	9	35
HOM000219	12	12	16	12	9	27	25	36	17	21	18	16	11	18	11	11	19	12	9
HOM000220	16	13	16	11	20	26	20	26	16	19	17	24	13	13	14	19	18	15	10
HOM000222	9	9	8	15	20	19	8	58	20	19	12	24	10	13	13	36	8	9	8
HOM000224	21	15	14	13	7	33	17	24	18	17	11	21	10	11	9	9	21	9	8
HOM000225	16	13	16	12	11	39	14	36	18	14	13	21	14	14	15	16	19	7	4
HOM000226	13	17	12	10	14	26	15	27	12	14	13	29	24	15	14	11	14	13	19
HOM000227	22	20	15	13	14	25	12	27	18	11	15	24	14	14	13	13	21	11	8
HOM000228	19	17	12	14	10	39	15	29	22	14	14	27	15	10	15	17	14	16	12
HOM000229	14	13	14	10	9	32	23	28	15	13	24	18	10	13	12	19	20	15	15
HOM000230	3	18	15	13	12	34	29	35	13	34	15	17	9	29	15	11	19	12	10
HOM000231	22	13	13	14	10	28	18	27	15	14	14	20	10	12	12	17	19	12	17
HOM000232	10	9	0	13	46	14	14	75	25	8	0	42	41	0	30	7	0	8	7
HOM000234	19	17	16	13	14	28	24	26	17	17	15	25	12	10	15	14	17	15	13
HOM000235	21	17	14	13	12	21	9	35	16	13	14	22	18	16	14	14	14	9	9
HOM000236	13	12	13	9	17	24	9	26	20	10	25	16	18	26	19	15	24	6	5
HOM000237	17	16	0	24	21	52	17	21	37	30	0	28	32	1	20	15	1	1	1
HOM000238	4	4	11	4	6	18	21	17	11	21	34	18	6	39	8	25	16	3	2
HOM000239	15	15	17	8	12	18	8	16	11	26	23	17	8	24	17	31	22	7	5
HOM000240	12	10	13	13	11	37	14	44	20	12	14	23	14	14	13	14	24	11	11
HOM000241	12	13	9	22	17	34	13	32	21	32	20	17	19	10	24	7	8	3	4
HOM000242	18	14	16	12	13	35	14	27	18	21	17	19	10	12	13	13	24	8	9
HOM000243	13	13	15	11	15	29	14	33	20	7	7	30	11	14	14	11	19	12	11
HOM000244	18	19	10	14	15	33	22	36	21	20	11	20	12	11	15	15	17	12	8
HOM000245	17	20	13	10	21	10	12	36	9	31	29	12	9	11	13	6	18	9	15
HOM000246	26	16	14	10	11	21	19	25	12	18	17	19	14	17	12	10	17	9	8
HOM000247	11	10	11	14	12	31	18	46	18	12	10	23	12	9	14	19	10	10	9
HOM000248	13	9	12	7	10	20	13	33	14	25	11	20	13	11	11	16	20	18	23
HOM000249	14	14	18	10	8	34	14	39	17	12	18	16	11	20	10	10	23	12	9
HOM000250	10	9	9	9	13	20	5	44	13	9	13	19	29	14	21	17	10	8	8
HOM000251	17	17	12	13	13	34	12	35	19	14	15	20	11	13	13	10	18	16	13
HOM000252	19	11	11	10	8	23	17	38	13	8	12	18	8	13	11	12	14	13	17
HOM000253	17	14	9	13	9	25	13	42	18	6	11	20	12	10	12	14	13	8	10
HOM000254	27	20	9	15	21	15	15	28	14	9	11	16	11	12	11	20	13	11	23
HOM000255	18	15	17	9	11	23	9	27	18	10	20	18	12	17	10	10	18	8	7
HOM000256	12	12	11	12	8	24	13	35	16	23	12	18	10	13	10	11	21	9	8
HOM000259	14	13	12	18	9	28	21	35	13	14	13	21	10	14	10	10	17	11	10
HOM000260	14	13	16	7	13	29	15	32	11	35	23	26	8	17	15	6	10	8	5
HOM000261	12	13	11	10	12	23	7	25	16	8	13	19	9	14	11	14	23	10	11
HOM000262	15	15	13	11	11	43	20	25	20	14	15	22	11	14	11	6	21	12	9
HOM000263	12	12	15	10	9	40	15	21	16	17	20	17	11	15	13	8	24	18	11
HOM000264	14	15	15	14	19	27	10	20	17	15	17	15	16	15	19	13	15	13	10
HOM000265	6	5	11	11	10	26	15	29	24	44	15	20	25	10	12	12	9	11	13
HOM000266	13	15	8	13	19	35	20	25	18	9	12	22	13	11	17	15	11	10	7
HOM000267	10	14	10	10	16	18	19	57	15	10	12	24	15	12	13	15	11	5	4
HOM000268	20	16	15	16	9	23	10	19	13	30	16	20	10	11	11	12	15	10	6
HOM000269	15	13	14	7	12	21	10	19	10	14	13	15	9	14	8	7	20	9	5
HOM000270	12	11	15	10	10	31	12	10	22	16	16	20	11	15	14	13	15	5	4
HOM000271	15	17	15	11	11	30	16	23	25	33	12	23	11	8	10	9	16	17	9
HOM000272	15	14	13	7	9	16	7	27	19	9	18	23	9	18	11	15	19	13	12
HOM000273	11	11	13	11	13	23	12	39	15	12	17	24	11	15	13	15	13	5	4
HOM000274	10	9	13	11	10	16	19	26	10	11	11	14	9	13	9	13	14	8	8
HOM000275	13	11	19	10	10	34	10	1	16	18	17	20	11	17	10	11	27	11	13
HOM000276	7	7	5	6	4	21	12	13	12	127	6	17	6	7	6	14	7	10	7
HOM000277	13	13	15	11	11	34	13	29	15	7	14	24	10	12	11	14	18	17	13
HOM000278	14	12	12	8	11	21	17	25	17	12	13	21	16	15	12	11	14	9	14
HOM000279	14	13	14	9	8	25	13	33	18	10	15	17	10	16	12	8	24	11	8
HOM000281	20	13	16	10	19	20	12	20	14	13	17	16	10	19	9	9	16	7	4
HOM000282	17	12	12	10	11	33	24	21	20	15	11	16	11	9	10	11	19	14	12
HOM000283	19	11	10	8	19	17	12	29	17	23	15	17	8	9	11	9	10	16	32
HOM000284	24	19	12	7	21	19	29	28	8	30	12	14	9	11	14	13	7	5	2
HOM000285	16	12	11	9	10	20	9	20	30	17	15	20	13	15	12	12	14	8	6
HOM000287	42	26	10	11	20	14	11	21	11	16	13	15	7	14	13	7	7	4	5
HOM000288	10	18	12	13	9	24	20	14	14	13	9	25	13	11	15	15	13	8	8
HOM000289	13	13	9	9	8	22	9	17	11	19	12	15	9	12	9	9	9	7	8
HOM000290	15	13	24	3	23	2	45	41	3	29	20	8	6	18	3	1	5	2	1
HOM000291	19	20	9	10	9	26	12	21	13	11	16	14	10	16	21	9	13	11	8
HOM000292	13	15	13	13	12	18	7	18	22	9	13	19	14	12	15	15	16	9	21
HOM000293	16	12	10	13	16	26	7	50	16	12	10	19	11	9	16	9	17	13	8
HOM000294	12	9	8	12	10	25	16	33	15	9	12	16	9	9	13	15	14	9	12
HOM000295	13	11	12	12	12	25	18	24	19	14	11	13	11	11	8	9	15	10	10
HOM000296	6	6	13	5	12	22	16	36	9	27	11	16	12	21	16	14	18	7	15
HOM000297	17	13	11	10	12	35	18	25	16	20	11	15	12	11	8	10	14	9	10
HOM000298	8	8	12	10	12	33	13	32	17	8	15	23	8	10	9	12	16	11	7
HOM000299	10	6	5	5	5	18	16	14	10	10	7	11	23	3	5	9	9	12	9
HOM000300	14	14	11	10	11	33	13	24	16	14	11	16	9	12	12	9	18	11	8
HOM000301	8	7	2	4	54	19	8	67	3	27	1	10	4	3	3	16	2	1	1
HOM000302	17	15	6	13	10	37	11	27	18	23	8	21	14	10	16	14	7	9	9
HOM000303	17	16	12	12	11	31	9	22	16	12	15	18	9	10	11	13	20	12	12
HOM000304	10	7	13	7	10	11	8	41	17	3	12	27	9	10	16	12	13	10	9
HOM000305	14	10	17	5	10	27	10	20	15	10	20	15	11	22	8	5	26	6	5
HOM000306	15	14	13	7	10	25	16	27	12	7	18	13	6	16	8	9	20	14	9
HOM000307	14	12	12	7	8	26	11	19	17	16	14	25	10	20	13	7	19	7	7
HOM000308	20	17	17	8	10	22	7	25	20	8	10	14	13	15	12	7	22	28	34
HOM000309	16	9	21	11	14	15	16	24	9	9	12	10	9	12	7	8	12	13	11
HOM000310	19	15	12	7	11	23	9	20	12	11	17	16	8	17	10	7	22	9	6
HOM000311	10	10	9	14	19	24	11	29	18	15	6	21	10	14	11	15	16	9	9
HOM000312	12	11	6	11	15	30	11	34	17	16	10	15	13	8	15	12	8	8	5
HOM000313	1	1	12	14	7	20	9	30	12	11	31	14	8	23	14	13	13	1	1
HOM000314	5	12	11	9	11	25	19	36	14	6	11	16	9	14	9	13	17	16	13
HOM000315	13	13	9	11	9	23	12	17	14	11	12	21	13	9	15	10	11	9	8
HOM000316	12	11	11	9	9	22	10	43	9	16	13	14	7	9	11	7	11	2	4
HOM000317	11	10	10	12	10	23	22	23	14	11	10	19	11	11	10	12	12	8	8
HOM000318	12	14	13	10	8	18	11	30	16	11	18	17	12	15	10	9	15	8	6
HOM000319	13	11	11	10	8	28	16	35	14	13	10	17	8	15	8	7	18	13	13
HOM000320	8	8	11	12	10	26	15	38	12	13	10	15	10	11	13	22	12	7	6
HOM000322	24	21	13	17	11	21	17	13	13	7	12	13	10	14	18	7	16	10	9
HOM000323	13	11	13	8	12	16	7	26	14	10	14	14	10	15	10	5	24	4	4
HOM000324	16	13	12	13	7	24	10	16	17	9	15	18	12	16	15	9	18	9	11
HOM000325	14	14	11	13	13	22	12	18	16	10	10	16	9	11	10	9	9	9	9
HOM000326	7	8	9	11	8	15	17	33	11	18	10	16	21	11	17	20	10	8	7
HOM000327	14	11	10	12	8	22	18	23	10	12	11	13	10	14	9	10	17	6	6
HOM000328	15	13	9	11	7	24	11	28	13	9	9	13	7	12	13	8	13	8	4
HOM000329	17	14	12	10	11	21	9	18	17	6	14	19	11	13	12	18	15	12	8
HOM000330	17	15	11	8	9	28	17	21	12	10	13	18	11	12	10	7	17	12	9
HOM000331	12	9	9	15	9	22	13	22	14	10	12	12	8	15	9	8	20	7	8
HOM000332	22	17	12	8	7	34	10	21	17	8	14	18	10	12	11	4	20	7	6
HOM000334	5	6	10	8	8	17	20	27	11	5	11	11	8	9	10	10	13	12	19
HOM000335	15	14	11	15	9	27	12	24	19	10	10	18	12	16	13	6	17	10	6
HOM000336	10	11	9	11	11	20	19	27	12	9	14	13	7	13	8	10	23	12	9
HOM000338	9	9	12	10	8	32	5	17	13	9	12	12	11	13	11	23	15	10	8
HOM000339	11	10	8	17	17	19	14	22	15	19	10	15	12	14	10	9	15	10	14
HOM000340	15	15	13	10	9	22	9	16	15	10	13	15	9	13	12	17	17	7	4
HOM000341	16	15	7	8	8	18	12	45	16	9	8	13	8	6	8	9	21	45	62
HOM000342	10	10	9	8	30	20	9	25	14	10	12	18	14	8	10	12	13	11	9
HOM000343	15	14	10	6	9	29	16	17	13	11	11	13	7	9	7	7	21	6	5
HOM000344	9	9	13	9	12	24	9	22	12	9	15	18	9	13	9	13	16	9	7
HOM000346	10	8	8	6	11	23	15	30	20	14	15	22	10	7	10	21	7	6	5
HOM000347	11	9	12	10	7	26	13	21	14	11	12	21	10	14	10	8	23	11	10
HOM000348	16	11	14	7	9	14	10	34	11	9	16	16	9	14	9	9	14	4	2
HOM000349	13	11	11	10	12	29	15	30	13	11	12	16	9	12	9	10	14	8	8
HOM000350	9	8	11	8	7	14	5	33	9	6	10	12	9	9	7	8	12	7	8
HOM000351	11	11	16	9	10	25	12	15	15	9	15	11	11	17	8	10	18	7	6
HOM000352	9	9	5	9	13	19	8	35	13	11	7	14	12	8	13	11	10	17	23
HOM000354	8	6	9	10	6	19	5	35	12	7	12	19	7	11	9	14	17	8	14
HOM000355	13	12	10	10	12	31	11	18	16	9	12	17	12	11	10	15	9	12	9
HOM000356	13	12	12	8	6	21	7	23	19	10	15	20	11	16	11	10	21	7	6
HOM000357	14	13	14	8	10	29	9	20	12	15	13	16	9	15	9	13	15	14	9
HOM000358	13	10	7	6	10	25	6	15	14	12	17	12	8	11	10	17	15	4	4
HOM000359	19	14	10	6	10	22	11	32	10	33	13	13	6	8	16	10	7	4	8
HOM000360	9	9	8	10	9	19	9	21	14	14	9	15	14	6	9	8	9	15	22
HOM000361	6	7	13	6	17	21	10	30	16	11	11	18	13	10	12	15	12	3	4
HOM000362	17	9	6	10	9	18	17	27	14	7	6	19	11	3	12	13	8	6	4
HOM000363	12	9	11	9	11	18	9	40	12	5	11	13	8	10	11	9	16	9	10
HOM000364	9	8	13	6	11	9	10	13	10	9	11	14	6	11	8	7	16	7	5
HOM000365	9	9	8	10	10	16	18	16	8	18	8	14	9	8	9	9	9	6	6
HOM000366	11	13	11	8	9	23	5	28	15	9	15	11	9	13	13	10	22	11	10
HOM000368	9	8	10	8	14	23	8	20	17	6	12	23	12	12	10	10	12	19	23
HOM000369	7	6	11	5	10	12	10	29	10	6	8	10	5	42	5	12	17	5	5
HOM000370	10	11	10	13	12	21	9	34	11	14	9	16	9	9	9	14	13	11	10
HOM000371	18	18	3	10	12	25	10	27	23	10	9	24	14	7	17	5	5	11	8
HOM000372	13	11	11	7	11	25	7	35	13	9	15	18	8	13	9	6	17	6	7
HOM000373	9	10	9	9	9	15	7	28	12	23	8	17	7	11	9	10	12	6	10
HOM000374	12	10	13	10	9	31	9	23	16	12	13	18	10	10	10	7	16	8	7
HOM000376	140	80	1	1	5	2	1	1	1	2	1	1	1	1	2	1	1	2	2
HOM000377	9	9	11	9	8	25	5	38	13	9	11	20	9	12	7	15	18	7	6
HOM000378	19	13	9	10	11	15	11	20	11	13	10	15	9	11	14	12	11	6	4
HOM000379	14	12	10	4	8	12	7	35	10	13	13	8	6	13	9	11	12	7	6
HOM000380	9	13	9	8	6	21	8	37	11	12	9	13	8	9	10	9	15	10	13
HOM000382	10	5	8	5	7	10	11	19	5	4	6	9	13	5	8	10	7	8	6
HOM000383	11	9	7	14	10	16	17	36	12	13	10	15	10	9	10	15	6	7	6
HOM000384	9	9	16	9	11	22	10	14	10	9	18	9	8	16	10	5	15	5	5
HOM000385	8	7	10	7	9	16	12	31	9	10	9	12	10	8	7	7	12	7	7
HOM000387	11	11	6	11	14	12	7	24	11	8	12	13	9	8	20	15	8	7	5
HOM000389	1	8	22	6	9	9	2	16	5	10	26	4	13	25	6	7	24	10	8
HOM000390	9	8	9	7	8	18	9	25	13	7	9	12	9	4	8	11	15	12	20
HOM000391	9	7	12	10	11	21	17	15	12	27	8	12	8	11	10	10	9	9	8
HOM000392	13	13	10	8	9	20	8	26	16	8	12	16	7	10	15	9	14	13	9
HOM000393	13	13	23	5	7	13	10	16	8	4	21	11	7	17	10	11	14	4	5
HOM000394	13	10	10	5	8	25	16	17	16	11	15	17	6	11	9	8	20	5	4
HOM000395	9	11	8	9	23	18	10	11	13	9	13	16	8	8	6	7	10	14	38
HOM000396	15	13	8	7	9	20	15	42	16	6	8	13	6	6	7	9	12	14	6
HOM000397	10	8	9	13	10	17	14	20	11	9	10	9	10	9	8	5	11	7	22
HOM000398	9	11	8	5	7	23	7	24	17	10	10	16	11	9	11	8	16	12	11
HOM000400	3	3	1	1	1	2	7	2	1	93	2	24	1	1	78	2	2	2	1
HOM000401	11	9	20	8	7	15	11	18	12	9	0	17	10	24	5	11	20	7	5
HOM000402	12	10	9	7	8	19	3	24	9	9	11	15	10	8	8	8	14	8	12
HOM000403	16	7	9	8	15	18	10	16	10	5	11	11	7	9	7	11	16	20	28
HOM000404	10	10	8	11	8	20	15	25	13	18	6	21	10	6	10	11	12	10	8
HOM000405	13	12	7	8	11	27	9	20	19	8	13	15	10	12	9	8	18	8	6
HOM000406	6	7	21	4	9	5	2	12	4	7	26	9	4	33	7	4	34	10	6
HOM000407	15	12	7	7	12	23	11	17	11	9	11	19	10	8	13	8	13	3	3
HOM000408	13	11	8	8	7	29	8	15	15	14	8	21	10	7	8	9	9	8	7
HOM000409	10	9	8	8	11	17	10	22	10	8	11	14	6	7	7	12	16	9	13
HOM000410	4	6	13	3	10	12	10	43	6	9	11	11	10	15	9	11	7	3	2
HOM000411	11	8	9	7	10	16	9	28	12	5	7	13	9	8	8	7	13	10	7
HOM000412	8	9	12	10	10	22	7	17	17	9	12	17	13	9	10	10	18	12	5
HOM000414	10	10	11	6	8	21	7	15	12	11	14	11	6	9	10	12	16	11	7
HOM000416	11	12	11	6	9	19	10	19	13	11	10	15	8	22	8	8	17	13	10
HOM000417	8	8	12	6	7	19	6	17	11	10	22	13	8	17	6	10	14	17	44
HOM000418	12	12	10	10	9	25	13	15	10	6	10	12	7	6	7	9	19	6	4
HOM000419	6	6	10	4	4	44	12	6	19	18	11	28	15	10	4	8	10	3	4
HOM000420	11	12	5	10	9	22	10	23	14	20	7	16	8	11	9	7	14	11	11
HOM000421	8	8	13	5	6	22	8	19	9	5	11	14	6	17	7	8	24	8	5
HOM000422	7	8	8	13	11	21	5	25	12	13	10	14	9	8	10	7	11	9	9
HOM000423	11	11	9	7	10	21	7	26	11	7	12	13	8	11	9	7	16	9	7
HOM000424	11	11	8	8	7	22	11	29	13	3	9	17	9	9	9	10	14	6	3
HOM000425	12	10	9	7	7	14	10	21	9	7	8	18	7	9	8	7	14	9	22
HOM000426	4	5	9	5	37	20	9	29	12	6	10	9	8	8	20	5	8	3	3
HOM000427	7	7	4	10	12	13	11	15	8	5	4	9	6	7	9	6	4	6	5
HOM000428	19	14	9	5	11	23	9	17	13	8	13	14	7	8	9	8	13	10	9
HOM000429	11	11	8	8	11	21	11	21	11	6	7	16	7	9	8	8	8	9	6
HOM000432	33	26	1	10	14	15	9	24	30	11	1	8	12	1	10	11	1	20	51
HOM000433	9	10	4	5	5	20	79	9	10	11	5	10	5	6	5	5	9	2	2
HOM000434	12	11	13	6	13	20	6	15	10	7	14	11	7	9	10	17	13	13	9
HOM000435	9	9	9	6	8	20	8	24	16	16	12	15	9	7	10	9	14	12	8
HOM000436	15	12	12	7	8	22	9	27	12	10	10	11	6	12	7	7	13	12	11
HOM000437	7	7	16	7	9	12	4	21	7	4	8	16	7	5	12	10	13	8	6
HOM000438	15	15	13	7	7	28	11	13	10	6	15	11	6	11	8	7	15	11	10
HOM000441	23	8	30	0	23	2	29	11	1	29	17	0	1	7	2	1	5	4	13
HOM000442	13	12	11	7	8	18	8	19	15	7	14	14	9	13	10	6	18	5	5
HOM000443	18	15	6	8	8	13	13	50	10	5	5	14	8	8	7	7	8	8	5
HOM000444	11	11	10	7	8	15	13	23	12	9	12	14	8	11	7	10	19	7	4
HOM000445	8	8	13	7	9	23	16	9	9	13	11	8	6	14	11	8	11	3	2
HOM000446	2	7	4	0	19	7	4	40	0	19	7	1	1	42	12	0	37	1	1
HOM000447	14	13	12	7	9	13	5	21	12	5	15	11	7	14	8	6	19	7	3
HOM000448	9	9	9	8	7	26	11	20	12	12	10	13	6	9	7	7	14	5	3
HOM000449	9	9	8	8	7	26	3	18	13	11	10	13	9	11	9	9	10	8	9
HOM000450	9	9	13	4	8	14	10	20	12	8	10	17	8	12	9	17	13	5	5
HOM000451	12	11	4	10	12	21	9	21	12	3	8	13	8	10	11	6	17	10	14
HOM000452	6	10	7	7	12	13	12	14	10	10	9	12	7	8	8	12	8	11	10
HOM000453	14	7	8	7	6	14	4	26	13	9	10	10	6	8	7	7	17	8	9
HOM000454	9	8	15	6	8	23	5	14	9	12	16	10	6	13	7	5	17	2	1
HOM000455	7	7	19	7	9	17	8	18	7	5	16	11	8	20	6	5	18	4	3
HOM000456	10	9	11	7	13	18	9	25	13	3	9	16	7	12	6	6	16	14	10
HOM000457	11	12	9	6	6	14	14	16	7	11	11	10	7	12	5	7	14	13	18
HOM000459	10	11	11	8	8	19	8	14	12	8	13	11	9	14	6	11	14	8	6
HOM000460	7	7	8	12	12	13	6	31	10	16	11	12	7	10	8	8	9	6	4
HOM000461	9	9	6	7	6	21	10	19	10	9	8	13	8	7	6	5	15	7	13
HOM000463	10	8	9	7	7	19	9	17	11	9	12	16	8	9	8	9	14	9	9
HOM000464	10	8	5	6	11	27	8	17	18	6	10	17	11	10	9	6	11	1	1
HOM000465	7	8	7	8	6	18	7	20	11	7	10	10	8	8	11	7	12	14	20
HOM000466	19	16	9	11	11	7	6	32	10	8	9	9	5	12	3	5	12	8	5
HOM000467	10	10	9	8	6	15	9	19	9	13	14	15	8	6	8	9	12	9	7
HOM000468	9	8	12	6	7	19	15	12	12	6	15	12	7	13	9	9	15	11	14
HOM000469	9	7	8	7	7	13	5	15	6	5	10	13	6	7	7	8	17	7	5
HOM000470	9	9	8	7	10	18	8	31	11	10	7	12	5	8	9	8	12	5	3
HOM000471	8	5	4	2	10	28	9	24	20	24	4	21	6	4	16	8	3	2	1
HOM000472	14	16	7	8	9	23	6	24	9	10	9	12	8	13	10	1	10	9	5
HOM000473	7	9	14	5	6	22	6	14	11	8	16	12	7	16	7	7	20	6	5
HOM000474	8	10	7	12	7	16	13	15	13	4	8	10	6	9	6	11	10	6	7
HOM000475	9	9	11	6	7	17	10	18	6	5	10	11	6	9	13	7	20	8	11
HOM000477	8	6	9	5	6	15	12	16	7	10	10	17	9	13	9	9	15	6	4
HOM000478	10	10	7	10	10	21	10	12	14	7	13	14	11	9	10	7	12	8	8
HOM000479	4	9	4	11	21	18	7	47	17	4	5	8	13	6	12	7	5	5	3
HOM000480	11	9	6	8	9	11	8	20	7	19	13	12	9	16	14	9	5	2	2
HOM000481	4	10	6	7	10	20	10	25	17	8	8	13	11	7	10	8	12	8	7
HOM000483	13	10	11	7	6	20	5	16	13	6	12	13	8	11	8	8	17	4	3
HOM000485	7	5	8	6	12	11	6	23	6	10	11	9	4	12	7	5	12	4	2
HOM000486	14	9	8	7	10	14	8	18	11	8	9	15	11	7	10	11	10	8	6
HOM000487	10	10	11	5	7	22	9	12	10	7	14	11	7	12	5	9	12	21	18
HOM000488	8	9	12	6	7	15	8	8	13	7	9	10	5	10	4	5	17	5	5
HOM000489	4	4	4	8	7	48	19	7	5	37	3	19	4	5	8	9	4	1	1
HOM000490	10	9	9	6	6	14	5	21	12	4	11	10	6	7	6	6	17	4	3
HOM000491	5	6	5	8	6	12	23	5	8	20	12	7	10	6	10	13	10	4	2
HOM000492	9	9	11	9	6	18	7	9	9	11	11	12	6	12	6	9	15	9	9
HOM000493	2	10	21	6	4	19	7	16	6	5	14	13	7	17	5	5	21	6	5
HOM000494	12	10	11	7	11	13	8	8	10	8	19	12	8	13	8	6	14	5	3
HOM000495	8	10	9	12	6	19	11	14	9	14	9	11	9	11	9	9	9	11	18
HOM000496	8	9	7	5	11	19	4	25	7	6	9	11	10	6	10	8	13	9	7
HOM000497	6	7	8	4	8	17	12	14	9	13	6	18	7	7	16	13	10	7	4
HOM000498	10	10	7	6	5	10	10	20	7	27	7	10	6	7	6	6	6	7	7
HOM000499	12	12	7	10	6	18	8	13	9	6	6	11	5	8	7	7	11	12	8
HOM000500	8	8	6	6	10	26	9	5	16	13	7	14	10	10	7	9	6	10	34
HOM000501	5	5	6	8	9	13	12	19	11	9	9	18	9	10	13	11	11	14	18
HOM000502	11	10	8	9	11	13	11	5	7	3	7	16	8	12	7	11	8	5	5
HOM000504	10	9	5	4	7	20	12	18	7	10	17	8	6	10	10	6	8	4	4
HOM000505	6	8	6	8	4	12	3	16	9	4	9	13	7	9	7	7	11	4	3
HOM000506	13	8	6	5	8	10	6	8	6	7	9	8	4	9	6	5	6	4	4
HOM000507	6	6	7	7	7	15	7	34	9	7	7	11	5	8	5	6	11	12	14
HOM000508	7	5	5	7	7	11	14	21	13	10	6	13	6	6	9	9	8	6	5
HOM000509	13	12	6	8	7	8	12	9	5	7	7	7	10	9	3	9	9	4	4
HOM000510	12	11	7	6	6	22	7	27	10	8	7	13	6	6	9	8	11	8	8
HOM000511	6	5	7	9	8	22	4	17	16	6	8	13	9	9	13	10	10	9	8
HOM000512	9	8	5	5	14	8	5	26	10	4	6	16	14	5	9	15	10	4	5
HOM000513	11	9	10	8	6	18	13	10	11	7	10	14	6	9	7	7	14	6	5
HOM000514	9	7	13	7	9	17	12	19	6	7	11	9	6	13	5	10	15	6	5
HOM000515	8	8	12	5	7	15	4	19	8	7	15	9	6	15	6	3	19	7	8
HOM000516	11	11	15	3	15	19	16	11	7	7	10	5	5	17	6	5	7	7	7
HOM000517	7	8	9	8	9	21	9	15	15	10	5	18	9	5	14	9	6	6	5
HOM000518	7	7	4	9	9	24	10	19	13	6	11	18	9	5	9	7	7	6	6
HOM000519	8	9	8	9	4	25	7	13	12	8	10	17	9	7	10	4	12	5	4
HOM000520	5	6	10	3	9	13	6	20	5	4	10	9	3	7	8	7	7	8	6
HOM000521	7	6	9	5	8	20	16	7	13	7	14	20	17	6	9	5	4	4	4
HOM000522	9	6	7	6	4	13	14	22	7	11	10	9	5	11	6	8	9	8	7
HOM000523	9	9	7	6	11	14	9	11	11	13	7	13	8	7	7	13	11	6	8
HOM000524	8	7	4	5	8	16	4	31	10	15	5	9	7	3	7	10	7	8	7
HOM000525	5	5	9	7	13	17	13	17	6	13	11	10	7	9	7	5	12	5	4
HOM000526	10	9	7	7	6	13	14	20	7	10	5	12	5	5	7	11	7	7	8
HOM000527	1	4	34	8	7	0	10	19	9	7	12	11	9	13	2	4	12	6	5
HOM000529	11	9	9	8	7	22	7	15	11	9	10	14	6	8	7	16	10	12	10
HOM000530	8	7	8	7	6	16	5	17	8	9	6	11	6	8	9	6	13	7	6
HOM000531	13	11	11	7	5	13	9	32	8	7	8	12	6	9	8	8	12	7	7
HOM000532	8	7	4	4	5	11	7	26	6	6	4	7	5	2	4	9	8	4	3
HOM000533	8	8	8	7	7	21	5	14	11	6	8	15	7	9	7	7	10	5	9
HOM000534	11	8	8	10	9	18	9	9	12	8	8	11	10	8	8	8	15	9	15
HOM000535	11	10	7	8	8	19	3	28	11	5	7	15	7	6	8	9	9	14	15
HOM000536	9	7	9	7	6	17	7	12	10	13	13	11	6	10	7	5	16	5	9
HOM000537	13	9	7	6	5	16	7	11	10	7	10	12	7	9	7	7	16	12	11
HOM000538	13	11	11	5	7	15	13	5	7	14	11	9	6	9	6	7	8	5	5
HOM000539	9	4	7	7	8	20	8	21	14	11	7	15	7	9	10	7	10	10	10
HOM000540	7	8	9	6	6	14	6	10	8	18	9	8	5	8	30	6	10	2	1
HOM000541	11	10	4	9	11	16	9	22	9	6	9	10	9	7	7	9	4	3	3
HOM000542	7	7	5	12	5	16	5	22	10	8	5	11	6	5	7	7	9	7	11
HOM000543	9	10	19	4	4	7	5	7	6	2	15	16	4	15	8	13	14	4	2
HOM000544	8	8	5	7	10	16	5	10	10	1	13	8	9	12	7	5	7	6	4
HOM000545	9	11	7	8	4	18	6	13	19	4	10	14	7	11	7	4	12	6	5
HOM000546	6	5	11	7	6	20	11	16	10	5	9	8	9	11	6	8	14	6	6
HOM000547	6	6	9	4	10	11	7	10	9	1	17	9	7	25	7	5	16	9	23
HOM000548	7	5	7	4	8	9	14	16	8	7	5	9	4	12	9	5	8	5	5
HOM000549	9	6	3	12	11	12	6	29	10	13	3	16	8	3	14	12	7	7	4
HOM000551	13	12	6	10	8	11	8	16	13	15	4	14	8	7	10	19	2	4	2
HOM000552	10	11	11	6	6	10	10	9	10	8	15	8	10	11	7	5	11	2	2
HOM000553	12	10	6	7	6	22	6	17	12	4	11	11	6	8	6	7	15	5	4
HOM000554	4	5	4	3	22	5	5	26	4	14	5	23	1	5	4	34	3	1	1
HOM000555	10	7	6	8	6	16	12	22	9	6	7	8	8	7	6	5	7	11	13
HOM000556	7	7	6	7	9	23	6	23	9	9	5	18	7	7	8	8	10	8	8
HOM000557	16	11	4	8	12	21	12	11	12	7	6	11	7	4	7	9	5	4	3
HOM000558	10	11	6	8	12	15	8	13	9	6	10	10	10	7	7	7	8	4	2
HOM000560	10	10	7	7	5	17	7	17	9	8	9	16	7	7	10	7	9	7	7
HOM000562	11	8	6	4	6	17	8	12	9	4	8	14	7	11	6	9	11	10	9
HOM000563	7	7	7	7	7	11	9	35	8	16	8	12	6	4	7	6	8	8	4
HOM000564	10	10	5	8	9	18	14	15	9	9	5	11	7	4	6	7	6	6	5
HOM000565	9	8	8	5	9	20	8	16	10	9	9	11	7	8	8	9	12	10	8
HOM000566	12	13	11	4	3	24	7	8	9	2	11	16	6	11	8	5	11	5	3
HOM000567	8	7	5	13	5	11	16	21	11	7	6	11	9	6	6	3	8	3	3
HOM000568	8	5	6	2	12	3	8	65	4	3	7	5	6	12	5	4	4	3	3
HOM000569	8	8	7	6	6	16	8	17	9	6	9	15	6	6	6	7	9	6	6
HOM000570	10	7	7	8	7	21	7	19	13	4	7	13	7	6	8	7	10	3	3
HOM000571	8	6	5	6	5	14	8	23	8	6	6	9	6	6	6	6	9	7	6
HOM000572	18	14	11	5	5	16	5	8	7	4	11	11	6	11	6	5	14	9	8
HOM000573	7	5	10	10	3	11	22	19	5	8	9	9	3	8	3	5	8	3	3
HOM000574	11	9	12	5	5	11	13	9	6	15	11	6	5	15	5	2	11	2	2
HOM000576	7	9	8	5	5	18	6	19	9	4	8	12	4	7	4	5	14	8	5
HOM000577	8	8	7	7	7	16	8	10	13	7	9	14	7	7	17	7	9	10	6
HOM000578	10	9	7	6	5	21	8	16	7	7	7	10	6	8	6	8	9	9	7
HOM000579	4	4	4	5	8	9	8	14	8	8	8	17	8	6	4	8	4	3	3
HOM000580	7	6	7	7	8	10	7	24	8	6	6	7	8	5	6	7	13	7	4
HOM000581	10	9	8	4	3	14	4	9	7	4	8	30	7	6	6	5	11	9	6
HOM000582	7	11	6	6	7	16	7	14	11	5	9	12	6	9	6	5	12	7	7
HOM000583	11	10	4	10	9	9	10	14	8	12	2	14	8	3	6	7	2	8	7
HOM000584	7	8	7	4	7	9	7	20	6	6	7	8	4	12	4	4	18	4	3
HOM000585	5	6	11	3	10	12	4	14	6	9	11	10	5	14	2	3	11	2	2
HOM000586	10	8	6	4	7	11	6	14	8	4	5	9	9	10	9	4	12	5	6
HOM000587	7	7	4	5	6	20	6	23	10	5	6	12	8	5	11	9	7	7	5
HOM000588	4	4	9	3	6	13	10	16	11	6	9	8	8	7	13	8	10	9	11
HOM000589	8	7	6	8	5	15	7	9	10	11	7	13	6	8	6	11	12	9	8
HOM000590	7	7	8	5	12	16	4	22	11	5	5	7	9	7	9	12	6	18	19
HOM000591	11	9	6	5	7	15	8	17	13	6	6	10	6	6	11	7	8	6	5
HOM000592	6	5	9	5	8	10	6	10	10	10	9	15	10	13	9	5	11	4	4
HOM000593	8	6	8	6	7	17	8	12	10	2	9	12	7	9	6	6	10	12	14
HOM000594	8	4	8	4	6	10	4	21	7	8	8	6	3	11	17	15	6	6	6
HOM000595	8	5	7	7	6	8	5	23	6	6	7	10	4	7	5	5	11	4	3
HOM000596	8	8	9	6	5	17	5	15	11	6	10	10	6	5	7	7	13	9	6
HOM000598	9	11	6	6	6	9	5	20	5	7	10	9	6	11	8	9	8	6	4
HOM000599	5	6	10	4	5	14	3	9	9	7	7	11	5	9	4	3	13	10	8
HOM000601	7	5	8	6	10	11	6	21	8	5	10	9	7	11	6	6	8	4	4
HOM000602	11	10	3	5	6	17	5	11	10	14	5	11	7	5	6	7	8	8	5
HOM000603	7	6	6	6	6	9	6	21	9	5	5	9	6	6	5	7	9	11	12
HOM000604	6	7	7	6	13	19	6	24	9	2	8	10	6	7	9	8	6	5	7
HOM000605	5	5	7	5	4	19	10	15	9	8	12	8	5	9	6	7	10	5	4
HOM000606	9	12	0	2	14	5	7	10	6	86	0	7	5	0	2	2	0	1	1
HOM000607	6	7	5	5	3	13	6	19	10	5	6	9	9	2	7	6	6	8	17
HOM000608	9	9	5	5	5	13	12	9	8	7	6	10	6	8	6	4	5	6	5
HOM000609	11	9	6	3	8	14	6	23	14	7	6	12	7	8	7	8	6	8	6
HOM000610	5	5	4	6	9	12	8	14	10	16	8	17	9	10	8	7	6	3	4
HOM000611	7	7	5	7	8	11	5	22	11	6	5	10	8	5	9	10	7	5	3
HOM000612	8	5	6	7	6	19	4	19	10	13	7	11	6	6	5	5	11	12	14
HOM000613	5	4	8	5	2	8	14	10	6	4	10	5	10	9	3	17	15	5	4
HOM000614	11	6	9	8	3	8	7	6	5	12	17	8	6	7	7	7	6	1	1
HOM000615	4	4	5	5	6	15	7	23	8	4	8	10	5	8	7	6	11	7	8
HOM000616	9	9	6	4	4	20	6	12	8	7	6	7	6	7	16	11	6	5	3
HOM000617	9	10	5	6	5	17	11	18	8	12	5	8	6	6	5	7	7	10	8
HOM000618	7	7	8	10	8	10	1	0	9	8	7	7	8	7	7	7	7	7	7
HOM000619	10	3	6	6	6	7	15	4	6	17	13	16	7	12	6	8	5	1	1
HOM000621	6	5	5	6	8	12	5	11	5	24	8	8	7	7	20	5	5	3	3
HOM000622	8	7	7	6	5	20	6	16	11	7	7	11	5	6	6	7	13	5	4
HOM000624	10	11	4	6	7	10	4	20	11	6	4	13	7	5	7	16	7	7	9
HOM000625	7	5	6	5	8	9	6	16	6	6	6	6	7	6	6	7	7	4	4
HOM000626	8	6	7	5	7	13	7	19	11	7	6	10	8	7	7	4	15	5	5
HOM000627	4	3	5	7	8	14	7	24	9	14	5	8	5	5	5	6	5	2	2
HOM000628	6	5	6	6	4	9	3	12	7	2	6	9	10	5	6	6	7	5	4
HOM000629	5	3	6	5	6	11	11	24	7	3	5	10	7	4	6	6	6	3	3
HOM000630	7	4	6	5	5	15	11	20	7	8	10	8	7	6	7	7	5	4	2
HOM000631	10	9	7	6	12	14	6	12	10	5	6	8	7	3	7	7	11	5	7
HOM000632	14	10	10	5	6	15	5	12	9	7	8	10	8	7	6	5	13	10	6
HOM000633	5	5	6	6	5	11	7	16	7	7	6	10	10	5	5	7	7	8	7
HOM000634	10	9	4	5	9	13	2	41	8	4	5	12	7	3	7	6	4	7	3
HOM000635	11	9	6	5	5	13	6	10	10	7	5	7	6	9	6	6	14	4	3
HOM000636	16	8	6	5	5	8	5	14	8	8	6	14	8	4	5	6	9	5	3
HOM000637	7	7	7	5	5	16	8	13	8	5	8	10	5	8	6	6	9	6	7
HOM000638	7	7	7	4	14	17	10	19	7	9	8	7	7	6	11	6	6	5	4
HOM000639	8	4	3	5	5	11	10	15	7	4	5	7	4	3	4	6	7	7	6
HOM000640	4	4	7	9	4	15	4	13	9	4	7	13	8	8	7	9	12	6	4
HOM000641	5	5	4	6	7	23	10	16	10	9	5	6	10	7	6	12	6	3	2
HOM000642	39	26	4	9	11	4	2	24	5	6	0	14	1	3	7	4	2	1	1
HOM000643	7	12	5	4	9	15	5	9	12	5	7	11	10	7	14	3	4	4	4
HOM000644	3	3	5	5	5	7	8	11	9	9	10	5	5	10	6	8	7	2	1
HOM000645	6	6	8	4	10	10	10	13	8	5	5	10	5	7	4	8	9	3	3
HOM000646	10	10	7	8	8	18	9	14	10	2	6	12	7	7	6	5	12	7	5
HOM000647	6	6	7	7	8	15	6	21	6	7	7	7	6	7	5	8	13	7	5
HOM000648	10	8	4	4	5	15	6	10	11	6	8	9	6	6	5	5	8	9	15
HOM000649	8	7	8	5	4	16	9	11	10	6	9	9	6	11	6	7	11	7	5
HOM000650	6	6	8	6	7	19	4	16	9	5	9	10	6	10	5	5	18	6	5
HOM000651	7	7	6	6	5	15	13	8	8	4	6	11	4	6	7	5	7	6	5
HOM000653	12	16	9	3	7	8	7	9	6	3	10	6	5	13	4	12	8	3	3
HOM000654	6	5	8	5	3	13	9	13	6	5	8	7	5	7	5	5	12	4	4
HOM000655	7	6	7	7	12	11	5	16	8	4	6	5	5	8	5	8	11	5	5
HOM000656	9	8	6	4	3	12	7	14	4	4	9	5	4	3	4	4	7	5	4
HOM000657	8	8	4	7	11	13	10	23	10	10	4	10	11	7	5	6	1	1	1
HOM000658	5	5	7	4	7	15	7	21	7	4	8	9	12	6	4	5	8	5	4
HOM000659	8	7	7	5	4	20	6	12	10	8	8	9	5	12	5	5	17	6	4
HOM000660	4	4	8	6	5	8	6	17	8	5	10	7	5	8	7	3	10	5	5
HOM000661	7	7	1	2	15	11	13	36	8	2	2	17	7	1	11	5	2	4	3
HOM000662	8	8	7	6	6	13	4	19	9	9	7	8	7	7	6	6	10	6	5
HOM000663	8	5	5	10	4	9	11	17	6	7	6	7	5	6	6	5	8	6	5
HOM000664	6	6	10	7	5	16	8	12	7	5	10	6	5	7	5	9	9	8	23
HOM000665	12	11	5	5	4	19	12	7	9	6	8	8	5	7	6	6	10	8	18
HOM000667	6	7	8	2	3	5	2	12	7	7	9	6	5	11	10	10	12	2	2
HOM000668	7	7	4	9	5	12	3	17	7	7	4	10	5	4	6	10	7	6	5
HOM000670	6	7	5	6	4	10	4	21	3	10	10	5	3	6	4	5	6	5	5
HOM000671	5	5	5	5	5	15	4	18	8	5	6	7	7	4	6	8	13	4	4
HOM000672	47	22	4	3	2	9	5	7	4	16	4	6	3	4	2	3	5	2	4
HOM000673	0	6	8	6	8	16	5	14	10	4	7	14	8	11	8	8	13	4	3
HOM000674	5	6	7	5	9	16	8	14	8	5	6	15	5	6	9	7	13	7	5
HOM000675	7	8	7	8	6	16	5	12	10	5	6	13	6	7	7	6	8	3	3
HOM000676	6	6	8	8	5	17	4	12	13	6	8	12	6	8	9	7	13	4	8
HOM000677	7	7	4	5	7	16	6	17	8	6	5	7	6	4	7	11	8	4	4
HOM000678	6	5	6	10	6	11	4	16	8	8	5	9	7	8	7	8	10	6	5
HOM000679	7	7	3	9	12	17	7	15	9	6	3	8	7	2	6	6	4	9	11
HOM000680	1	11	2	11	11	14	7	20	8	8	3	17	5	3	9	10	4	11	8
HOM000681	0	1	18	0	2	2	2	1	4	0	33	3	1	28	2	1	9	1	1
HOM000682	6	5	5	4	5	11	5	38	7	4	5	10	6	5	4	5	6	5	7
HOM000683	7	7	9	6	5	15	9	5	7	9	8	10	5	8	5	5	12	5	5
HOM000685	4	4	4	3	12	14	6	7	6	14	3	14	7	4	12	4	6	1	1
HOM000688	6	6	6	4	6	11	7	19	7	4	7	11	5	4	5	6	7	7	6
HOM000690	8	8	7	6	5	15	2	13	9	6	7	12	8	5	8	10	11	7	7
HOM000691	5	6	7	5	12	10	5	10	9	2	16	14	11	8	4	8	6	4	4
HOM000692	4	4	5	4	5	12	8	16	6	5	5	7	15	8	9	7	8	5	3
HOM000693	6	6	5	12	6	14	10	22	10	3	4	10	7	5	8	10	7	13	10
HOM000694	5	4	4	6	10	7	4	22	5	3	3	7	2	10	43	4	7	5	65
HOM000695	7	7	7	4	7	18	3	14	9	5	7	8	7	7	6	5	9	5	5
HOM000696	7	4	3	6	7	9	9	14	20	3	3	17	9	6	6	10	6	4	4
HOM000697	6	5	6	5	4	14	9	12	9	5	5	14	7	3	6	5	10	7	5
HOM000698	7	7	6	5	3	9	9	21	7	9	6	10	6	4	6	5	7	6	4
HOM000699	6	6	6	7	6	16	7	12	7	8	7	9	7	6	5	4	11	6	5
HOM000700	6	6	7	7	4	25	8	12	2	13	7	19	4	5	5	10	6	8	6
HOM000701	8	12	6	7	7	9	7	11	10	3	7	9	5	11	5	4	11	12	15
HOM000702	10	9	7	3	4	13	5	15	6	3	7	8	4	7	7	5	11	7	8
HOM000703	5	4	6	5	6	27	10	8	7	5	4	9	5	3	5	11	10	6	9
HOM000704	9	8	7	6	9	12	4	13	9	5	8	11	6	7	7	7	7	6	6
HOM000705	8	9	11	6	5	11	6	11	9	5	10	4	4	10	6	3	11	3	1
HOM000706	9	7	5	5	3	14	9	17	10	2	5	8	6	4	7	8	7	8	5
HOM000707	8	6	5	9	14	11	9	5	9	11	5	11	6	5	11	7	10	5	5
HOM000708	7	8	4	5	7	9	7	22	9	5	3	12	8	3	9	7	7	4	3
HOM000709	3	3	6	6	9	7	7	17	3	12	2	6	3	7	5	4	5	7	9
HOM000710	11	5	4	5	8	11	7	12	6	7	4	10	5	5	4	8	4	5	4
HOM000711	6	6	4	6	6	16	5	21	9	5	6	11	6	8	6	7	8	4	2
HOM000712	7	7	6	4	4	13	10	14	9	5	7	12	5	11	5	7	13	6	4
HOM000713	7	5	5	4	3	8	7	7	3	12	4	5	4	10	2	14	7	3	3
HOM000715	7	7	4	6	9	13	6	4	7	5	5	6	5	4	7	7	6	4	4
HOM000716	5	5	6	4	5	13	7	23	6	6	7	5	7	6	3	4	6	4	3
HOM000717	6	10	7	4	2	4	8	8	6	3	12	4	11	11	6	6	11	2	2
HOM000718	0	6	11	3	11	9	4	13	8	3	11	8	8	10	6	9	12	2	3
HOM000719	7	6	6	6	5	14	11	10	8	7	8	8	5	7	7	5	9	4	4
HOM000721	11	10	6	4	3	15	7	18	7	11	7	8	4	9	4	4	6	3	4
HOM000722	11	9	5	3	8	13	15	19	7	5	5	9	3	6	7	4	7	3	2
HOM000723	7	7	3	6	7	12	6	21	8	9	3	10	7	2	6	6	7	5	5
HOM000724	8	6	5	5	5	15	7	15	11	4	5	10	7	5	6	9	10	4	4
HOM000725	8	8	8	4	5	20	7	13	8	5	11	6	5	8	5	4	12	9	7
HOM000726	9	8	7	5	6	16	6	12	10	4	5	7	4	5	5	6	11	4	3
HOM000727	7	8	5	5	4	15	6	10	10	3	6	10	5	9	5	5	12	13	22
HOM000730	8	8	8	6	6	10	6	17	9	4	7	11	4	7	5	5	10	5	4
HOM000731	7	8	7	3	6	16	5	12	9	5	9	10	4	6	6	5	8	7	8
HOM000732	7	7	7	6	5	14	7	9	8	4	7	8	8	13	7	5	10	5	4
HOM000733	8	9	4	10	3	15	10	7	7	11	5	8	6	5	6	7	6	5	4
HOM000734	5	5	7	3	9	9	4	15	4	6	8	7	4	7	3	4	9	8	17
HOM000735	2	1	2	4	1	1	7	3	1	1	81	4	1	1	3	1	9	1	1
HOM000736	3	3	6	5	9	19	9	13	6	5	11	7	4	6	6	5	8	5	5
HOM000737	10	6	7	3	6	9	8	9	6	6	5	8	10	9	3	3	5	4	5
HOM000738	5	5	6	5	4	17	16	6	4	2	6	10	3	5	4	6	9	5	4
HOM000740	3	3	5	6	8	12	4	11	10	3	6	14	6	7	8	9	7	6	4
HOM000741	6	6	6	6	7	13	6	10	6	5	8	7	8	8	6	6	5	5	4
HOM000743	5	3	11	3	3	10	8	7	5	8	14	5	2	14	4	6	11	8	18
HOM000744	12	9	6	7	3	14	4	10	11	6	7	8	7	6	6	9	9	5	3
HOM000745	15	11	5	5	6	6	5	17	4	1	4	6	6	4	8	6	11	4	4
HOM000746	1	2	6	4	7	7	3	17	6	5	9	7	9	7	9	9	10	3	1
HOM000747	5	5	6	7	5	13	5	17	9	6	6	11	6	6	6	4	7	8	12
HOM000748	5	5	5	6	5	14	4	7	8	7	7	8	5	6	5	6	7	9	3
HOM000749	7	7	7	3	5	12	8	12	7	5	6	8	5	6	6	6	11	6	5
HOM000750	4	4	3	3	3	7	2	36	5	10	11	7	4	4	5	6	11	1	2
HOM000751	6	8	9	5	3	9	3	10	9	6	9	9	6	8	7	5	11	5	4
HOM000752	4	4	2	4	4	8	5	26	6	14	4	18	10	7	6	5	4	3	4
HOM000753	4	2	3	6	10	7	4	27	7	10	3	14	4	4	3	6	7	2	2
HOM000754	7	7	6	5	7	14	9	17	7	4	7	8	6	6	6	7	7	6	5
HOM000755	2	3	17	4	3	16	3	19	5	37	3	3	5	2	2	4	4	3	6
HOM000756	5	5	6	4	3	12	6	18	7	8	7	11	4	8	3	5	10	3	4
HOM000757	12	13	1	16	12	4	9	17	6	11	1	8	18	1	9	2	1	1	3
HOM000758	10	10	6	3	5	13	6	14	8	5	5	11	5	8	5	7	7	8	5
HOM000760	3	3	5	5	7	12	4	11	9	2	6	9	6	8	6	5	9	3	3
HOM000762	7	7	4	4	4	18	3	13	9	15	6	5	5	4	4	4	17	5	4
HOM000763	2	2	5	6	5	12	15	11	11	9	6	9	7	5	7	10	5	7	9
HOM000764	1	1	6	3	5	10	7	11	9	4	10	17	6	8	6	7	7	2	3
HOM000766	5	6	4	5	4	14	3	13	9	8	6	11	7	5	5	5	10	5	2
HOM000767	7	5	6	4	6	16	10	10	10	4	6	8	7	6	9	7	5	4	3
HOM000768	6	6	5	5	3	13	6	16	6	4	7	5	4	5	5	5	6	4	3
HOM000769	10	7	5	5	4	8	4	22	7	5	3	9	8	2	6	5	5	9	11
HOM000771	8	7	5	5	6	12	6	17	11	5	6	11	5	5	6	6	10	7	5
HOM000772	10	8	7	4	4	17	7	7	7	9	8	8	3	7	4	6	8	4	3
HOM000773	7	7	4	13	4	7	9	6	4	2	5	6	4	3	5	6	5	4	4
HOM000774	9	6	4	4	4	11	3	21	10	2	4	11	6	5	6	6	9	5	3
HOM000776	7	7	6	6	6	7	7	12	7	1	6	5	5	10	7	5	7	3	3
HOM000778	5	5	5	6	6	15	7	12	9	6	6	11	6	4	6	7	11	4	3
HOM000779	12	16	10	6	1	9	3	9	11	3	13	4	4	13	3	2	9	4	3
HOM000780	6	6	6	4	6	12	4	17	2	16	9	8	4	6	3	3	9	6	4
HOM000781	2	2	5	17	3	1	12	25	11	4	4	7	2	6	6	3	5	2	2
HOM000783	3	3	6	6	13	6	6	16	4	5	4	13	4	11	6	6	6	7	6
HOM000784	6	7	4	5	3	11	7	14	6	5	5	6	5	3	4	6	14	7	7
HOM000785	11	8	5	3	4	9	3	11	6	6	4	8	6	4	7	6	11	8	7
HOM000786	5	6	1	5	11	12	2	17	12	3	3	21	9	4	11	0	2	1	1
HOM000787	10	9	6	4	5	9	4	13	9	4	6	8	5	6	7	8	9	6	5
HOM000789	9	4	7	4	8	13	7	16	6	4	5	13	6	3	6	5	4	3	3
HOM000790	3	3	0	7	15	25	9	17	8	8	0	18	9	0	6	10	0	1	1
HOM000791	5	5	4	4	5	8	6	16	5	4	4	7	9	1	5	10	14	11	16
HOM000792	5	4	4	6	4	8	16	16	5	5	4	9	5	8	4	11	8	8	7
HOM000793	12	10	4	4	7	13	5	14	9	5	5	9	5	6	5	1	7	3	2
HOM000794	4	4	6	7	5	9	8	18	7	5	7	10	5	8	11	5	7	4	3
HOM000795	5	5	7	7	6	11	4	17	8	4	6	8	5	8	6	8	11	3	2
HOM000796	5	5	7	5	4	12	5	14	7	5	7	9	5	6	6	7	10	3	3
HOM000797	5	5	3	7	5	13	6	10	9	5	3	13	7	3	14	7	6	4	4
HOM000798	7	7	5	6	5	10	4	14	6	3	5	11	4	8	5	4	10	8	8
HOM000799	6	8	6	3	5	5	8	10	5	1	8	8	10	8	6	8	8	1	1
HOM000800	6	5	4	6	8	10	6	13	7	5	4	6	6	8	5	9	8	4	2
HOM000802	6	6	5	6	4	10	2	18	10	4	5	13	5	7	5	6	8	8	6
HOM000803	6	6	6	7	9	10	4	6	9	2	6	7	7	9	6	6	6	5	5
HOM000804	5	5	4	7	8	11	9	14	5	3	4	7	4	4	4	5	7	4	4
HOM000805	5	5	4	2	4	12	15	16	8	5	10	8	4	5	4	5	10	6	5
HOM000806	11	5	6	5	4	8	2	14	7	4	5	10	4	5	4	5	6	8	13
HOM000807	8	8	5	6	8	18	3	14	10	7	4	11	6	4	6	5	5	9	7
HOM000808	8	6	5	6	5	15	5	15	6	4	5	10	5	3	6	8	7	5	4
HOM000809	8	8	3	5	6	14	6	15	10	6	3	8	5	3	5	4	5	6	5
HOM000811	4	5	7	5	8	8	9	15	5	5	9	5	4	7	6	5	9	6	4
HOM000812	7	8	7	5	7	6	5	8	6	3	4	9	6	5	7	6	5	4	2
HOM000813	4	4	7	4	4	11	6	11	6	4	7	10	5	11	4	4	11	6	5
HOM000814	4	4	5	5	5	10	6	14	7	3	5	13	6	5	5	5	7	5	10
HOM000815	14	6	7	6	3	10	3	8	9	4	11	5	4	6	5	4	7	5	4
HOM000816	5	5	4	5	3	12	3	17	6	2	5	8	3	6	4	7	9	6	7
HOM000817	12	6	4	4	4	10	6	8	7	2	5	8	6	4	4	6	7	6	6
HOM000818	7	8	3	6	4	10	1	19	11	2	4	8	5	4	6	7	7	5	3
HOM000819	1	1	1	5	31	7	3	18	9	30	0	6	7	1	6	6	1	3	2
HOM000821	6	5	8	3	7	13	3	8	10	3	8	10	5	12	7	3	7	4	2
HOM000822	4	5	6	5	6	11	6	14	10	3	5	8	5	5	11	4	10	9	8
HOM000823	6	4	3	4	4	16	5	16	7	3	5	8	4	5	4	4	5	9	12
HOM000824	5	6	5	6	5	9	5	10	5	6	5	7	6	4	5	7	7	4	4
HOM000825	11	6	6	4	5	7	9	11	6	5	5	7	3	3	3	4	5	6	10
HOM000826	5	5	7	4	3	10	1	12	6	10	7	7	4	6	5	4	7	4	4
HOM000827	3	3	5	4	3	14	3	19	12	5	5	6	12	6	4	5	6	5	5
HOM000828	5	5	10	3	5	10	8	6	4	7	10	5	4	8	5	8	7	3	2
HOM000830	9	8	6	4	6	11	2	15	9	5	6	8	5	7	5	6	8	5	5
HOM000831	7	8	5	5	5	10	6	9	8	5	6	9	5	6	5	10	7	7	5
HOM000832	2	2	4	2	7	7	3	26	8	4	5	11	8	5	6	5	5	2	2
HOM000833	8	8	5	3	12	11	7	11	5	4	4	8	3	4	7	6	7	8	7
HOM000835	7	5	6	4	6	10	6	11	7	4	11	8	10	5	4	4	11	4	4
HOM000836	7	6	5	4	10	10	10	5	6	5	5	8	5	2	4	5	5	8	5
HOM000837	6	6	7	4	8	7	20	9	7	8	5	10	5	5	6	5	6	3	3
HOM000838	5	5	4	5	5	10	5	21	6	3	6	8	5	5	5	6	5	5	2
HOM000839	7	5	7	3	2	10	5	8	9	6	8	8	4	7	5	4	11	10	12
HOM000840	3	3	5	11	9	16	2	12	7	5	4	5	5	6	5	3	6	4	3
HOM000841	7	8	7	4	4	16	7	12	8	5	6	8	5	5	5	5	8	8	5
HOM000842	7	5	6	4	3	12	4	15	8	5	5	9	4	4	5	5	8	3	13
HOM000844	4	6	5	4	6	8	5	9	6	2	7	9	5	5	4	12	9	3	3
HOM000845	4	4	6	7	6	16	8	12	8	8	6	12	5	5	5	5	4	4	5
HOM000846	5	5	6	3	4	13	7	16	5	6	5	10	7	7	3	5	9	3	4
HOM000847	4	2	9	4	7	9	5	18	4	4	6	4	4	7	2	7	5	3	2
HOM000848	6	6	7	5	4	14	6	5	5	3	7	7	5	6	4	4	9	6	3
HOM000849	4	5	6	3	3	11	9	5	7	6	10	6	4	12	5	4	10	4	4
HOM000850	2	3	5	4	5	9	6	10	9	5	5	6	5	5	10	4	8	5	4
HOM000851	6	6	5	4	5	15	8	9	7	6	6	8	4	6	4	4	9	1	1
HOM000852	4	3	4	5	3	7	9	21	6	4	5	5	8	3	6	3	6	4	3
HOM000853	4	5	7	5	5	8	3	15	8	4	7	7	4	6	7	4	15	8	4
HOM000854	6	6	6	3	4	12	3	16	8	6	5	10	4	5	4	4	8	6	5
HOM000855	5	5	5	5	6	9	1	10	9	3	4	10	9	4	8	5	1	2	2
HOM000856	4	4	4	5	3	10	5	8	5	3	5	7	4	6	4	5	4	3	4
HOM000859	6	5	5	3	3	9	4	8	5	4	5	5	4	5	4	4	14	4	3
HOM000860	10	9	8	2	4	11	5	4	5	6	10	4	2	9	6	5	8	4	3
HOM000861	5	5	6	5	5	14	6	11	9	5	5	10	7	5	6	6	6	5	4
HOM000862	7	5	6	5	5	15	7	1	9	3	7	7	5	1	7	7	16	12	16
HOM000863	6	5	5	3	5	4	8	26	6	11	6	6	3	4	6	3	6	4	4
HOM000864	7	5	4	6	4	11	5	12	8	2	8	9	5	11	4	6	4	6	15
HOM000865	4	4	3	2	6	6	11	7	13	8	4	15	12	4	8	5	3	2	2
HOM000866	6	5	5	6	4	15	7	12	10	4	5	7	4	5	5	4	8	7	9
HOM000867	5	6	3	4	6	15	5	11	11	9	3	8	8	5	4	3	4	3	3
HOM000868	6	7	5	6	6	13	6	12	7	2	9	7	4	6	6	3	5	9	11
HOM000869	2	2	14	4	7	4	3	13	2	3	7	5	6	9	6	8	8	2	2
HOM000870	6	7	6	3	4	12	5	13	5	4	7	6	3	6	5	5	11	6	7
HOM000871	1	4	4	2	4	8	3	11	17	0	2	45	3	5	2	5	2	3	4
HOM000872	6	6	4	3	7	16	8	13	7	3	4	10	3	7	5	4	9	3	3
HOM000873	5	7	4	4	4	12	8	18	7	8	4	7	4	4	5	4	7	7	7
HOM000874	12	5	6	3	3	10	15	8	6	3	6	5	3	6	5	4	12	11	15
HOM000875	5	5	6	5	4	14	4	13	10	4	6	10	8	10	5	1	9	2	2
HOM000878	6	4	5	5	6	5	4	0	7	14	5	8	3	7	7	8	4	2	2
HOM000879	6	7	2	5	7	14	5	17	11	4	3	10	5	2	6	7	3	5	6
HOM000880	7	5	4	4	3	6	13	18	6	5	4	6	4	7	3	3	4	4	3
HOM000882	5	5	8	4	4	11	3	9	7	4	7	10	4	9	8	4	13	6	5
HOM000883	8	6	4	11	7	8	5	15	4	9	4	9	5	5	5	4	3	2	2
HOM000884	4	4	5	7	5	18	5	10	6	5	5	12	5	4	5	4	5	7	5
HOM000885	7	6	7	3	7	9	3	15	6	4	5	6	4	5	4	6	7	4	3
HOM000886	7	5	4	5	4	21	7	10	7	4	6	7	4	3	6	7	8	5	3
HOM000887	8	5	4	5	4	20	7	11	5	4	5	5	5	6	7	3	5	1	1
HOM000889	6	6	4	4	4	27	1	8	6	4	4	8	4	4	6	5	5	4	4
HOM000890	5	6	4	5	4	10	6	16	5	2	4	6	3	3	3	3	8	4	4
HOM000891	5	5	5	8	7	10	4	8	8	4	6	6	6	4	9	5	5	4	3
HOM000892	4	4	5	4	5	11	6	15	7	5	5	6	5	6	3	3	8	5	9
HOM000893	6	3	5	5	5	10	14	16	5	2	5	6	4	2	4	5	8	8	12
HOM000895	7	6	5	4	4	13	3	4	8	5	5	7	4	4	19	4	6	5	4
HOM000896	5	5	4	5	6	8	5	15	6	3	6	8	5	8	5	4	5	3	2
HOM000897	4	4	5	9	4	11	4	11	6	5	6	11	4	5	5	8	8	5	4
HOM000898	6	5	6	3	5	8	4	2	8	4	6	7	7	7	5	5	10	4	3
HOM000899	4	4	4	6	4	11	7	23	5	1	3	6	3	4	6	3	5	4	4
HOM000900	6	7	5	9	4	7	13	11	6	3	8	5	4	4	4	2	7	9	16
HOM000901	8	5	5	4	4	10	9	13	4	5	5	7	3	5	4	4	6	6	6
HOM000902	5	5	5	4	5	10	6	10	7	7	7	8	4	6	4	5	7	11	7
HOM000903	4	7	6	4	5	10	3	16	7	2	8	5	4	6	3	4	8	5	5
HOM000904	6	4	5	3	5	11	6	14	7	3	5	9	4	7	7	4	10	3	3
HOM000906	5	4	7	3	4	10	3	6	7	4	9	7	4	5	5	6	10	4	2
HOM000907	6	3	3	5	3	5	2	9	4	2	4	6	5	1	3	5	2	3	4
HOM000908	9	5	7	8	5	9	1	6	7	2	6	8	5	5	5	6	8	5	4
HOM000909	10	12	3	4	6	8	11	10	6	4	4	8	4	2	6	3	5	2	2
HOM000910	4	4	7	5	8	7	3	19	5	3	5	7	4	5	4	7	7	3	3
HOM000911	3	3	7	3	3	11	5	10	7	5	7	6	3	9	3	3	12	3	7
HOM000912	5	3	6	5	4	10	4	12	11	5	4	8	7	5	8	4	9	2	2
HOM000913	5	5	6	5	4	10	6	7	5	6	7	8	5	7	4	4	7	4	4
HOM000914	5	5	4	3	3	10	7	8	3	20	4	5	3	4	8	7	6	8	13
HOM000916	5	5	4	5	4	7	2	17	6	6	5	9	6	3	5	5	4	5	5
HOM000917	11	8	4	5	4	10	5	23	7	5	6	8	3	4	4	2	5	6	4
HOM000918	5	5	4	3	7	10	6	10	4	12	6	4	9	5	3	3	3	2	2
HOM000919	8	5	2	3	5	7	5	9	6	4	3	10	5	3	7	2	3	3	2
HOM000920	1	5	12	7	3	14	4	9	7	4	4	8	4	7	4	5	12	6	4
HOM000921	7	8	2	4	5	11	7	17	6	6	4	10	5	2	4	6	5	4	4
HOM000922	9	9	6	4	4	15	8	10	7	7	5	7	5	5	4	3	7	3	1
HOM000924	3	3	6	6	5	11	8	15	8	3	6	9	3	6	4	3	10	5	4
HOM000925	6	5	6	9	2	11	4	12	5	5	7	8	5	6	4	3	8	5	7
HOM000926	4	4	2	5	10	9	7	14	6	6	4	8	5	9	6	6	5	2	2
HOM000927	5	4	7	6	4	8	5	10	7	2	9	6	4	8	4	4	9	4	4
HOM000928	2	2	3	8	7	7	9	12	7	5	2	4	3	2	8	10	2	1	1
HOM000929	7	4	4	4	9	7	4	24	4	7	5	7	2	5	3	4	5	3	1
HOM000930	6	7	7	2	3	7	4	6	6	4	9	10	8	8	6	5	11	3	3
HOM000932	4	4	3	4	6	12	5	19	6	4	5	8	5	2	4	5	5	15	11
HOM000934	3	3	1	2	3	7	2	13	5	4	3	6	2	5	2	3	42	4	2
HOM000935	9	6	3	7	6	8	3	15	4	4	5	7	5	4	3	5	6	4	3
HOM000936	7	9	4	5	3	6	2	5	8	8	3	6	6	4	8	3	5	3	3
HOM000938	5	5	5	4	3	9	6	8	5	7	6	5	4	3	4	6	6	4	12
HOM000939	6	6	4	5	6	15	7	12	7	5	6	11	6	4	5	3	5	4	5
HOM000940	6	6	2	3	3	13	7	5	7	11	7	9	4	4	8	3	4	3	2
HOM000941	7	6	4	4	5	10	7	2	4	6	4	17	3	2	4	6	6	17	50
HOM000942	3	3	3	2	2	7	7	35	4	0	3	18	2	5	2	4	7	4	6
HOM000943	4	4	7	4	2	11	6	5	5	4	6	7	9	15	4	4	8	3	8
HOM000944	3	3	2	6	3	7	8	18	10	10	2	19	4	4	3	5	2	5	6
HOM000945	6	5	5	5	4	11	5	13	8	7	5	8	5	3	6	4	7	4	4
HOM000946	3	4	4	4	5	12	7	14	8	4	6	8	5	3	5	7	10	5	5
HOM000948	4	4	4	9	4	7	6	1	5	4	4	6	4	4	4	6	5	4	4
HOM000949	8	6	4	4	6	8	5	7	8	3	5	6	8	1	6	3	5	2	2
HOM000950	2	1	4	2	9	4	4	23	8	5	7	5	11	4	2	1	4	2	2
HOM000951	6	5	7	3	6	9	3	10	6	3	7	7	4	5	7	3	8	3	12
HOM000952	6	6	5	3	3	7	6	8	6	2	5	10	3	4	3	3	20	5	9
HOM000953	7	6	5	5	5	10	3	13	10	2	5	9	5	5	5	4	9	6	4
HOM000954	5	5	6	5	3	7	3	5	7	6	5	8	5	6	4	7	7	4	5
HOM000956	4	4	6	4	3	9	5	11	3	9	3	11	3	3	4	5	5	3	3
HOM000957	8	5	6	3	5	9	5	17	6	2	2	6	3	6	5	3	5	3	3
HOM000958	3	5	5	6	7	10	7	8	8	7	4	8	8	4	5	5	7	4	3
HOM000959	5	4	5	3	4	12	7	9	5	7	8	6	3	5	6	4	8	9	12
HOM000960	5	4	4	5	4	6	7	7	5	2	7	10	3	4	3	3	7	5	5
HOM000961	3	2	6	5	2	4	11	2	6	23	9	6	7	4	3	7	3	2	1
HOM000962	6	6	7	3	4	12	2	9	7	4	7	7	4	5	4	8	8	5	4
HOM000965	5	5	4	5	2	10	3	12	6	6	4	6	4	4	4	5	11	6	4
HOM000967	5	3	4	6	3	5	5	14	5	2	13	5	3	4	7	3	9	3	3
HOM000968	4	4	6	4	3	9	3	8	5	5	7	6	4	6	4	5	7	4	4
HOM000969	11	8	6	4	4	8	6	7	7	3	7	6	5	6	3	3	4	3	3
HOM000971	9	6	5	4	4	10	6	10	7	3	4	10	4	5	4	5	12	6	4
HOM000972	5	5	3	4	4	7	3	13	4	4	4	6	2	4	4	4	3	3	2
HOM000973	5	5	4	6	5	12	10	7	7	1	4	5	3	6	3	16	6	6	10
HOM000974	11	5	4	2	4	8	1	15	4	2	4	5	6	6	4	4	11	2	2
HOM000975	3	3	2	2	4	6	6	6	3	37	2	3	4	2	2	3	3	2	2
HOM000976	4	3	4	2	4	6	2	33	4	0	5	5	3	3	3	3	4	3	3
HOM000977	4	4	5	6	7	11	9	12	5	4	6	5	4	7	5	4	7	4	3
HOM000978	5	6	4	4	11	4	3	26	0	7	2	10	2	6	2	13	3	1	1
HOM000979	5	6	4	4	3	9	6	7	4	2	4	5	4	4	5	4	4	4	3
HOM000980	7	6	4	5	9	5	5	8	5	6	4	14	2	3	4	5	3	2	2
HOM000981	5	4	3	4	2	6	4	13	5	4	3	6	3	5	3	4	4	4	9
HOM000982	5	3	4	4	16	4	4	14	3	6	5	3	4	3	3	3	3	3	2
HOM000983	6	5	6	4	4	14	7	11	4	4	6	4	3	6	4	4	10	4	3
HOM000984	12	5	3	3	7	2	5	17	6	1	6	2	2	4	10	3	6	2	3
HOM000985	5	5	4	4	5	9	6	13	7	8	4	7	6	5	4	4	7	7	6
HOM000987	5	5	3	4	4	10	3	13	6	7	3	7	4	3	4	6	5	4	4
HOM000988	5	3	5	3	5	11	11	13	5	6	5	6	3	4	4	4	5	5	4
HOM000989	8	6	4	5	2	11	3	4	4	9	7	6	7	4	2	10	4	3	3
HOM000990	6	5	4	5	3	7	7	13	6	4	4	10	6	0	6	6	3	4	4
HOM000991	6	5	3	3	3	7	6	21	4	2	5	6	2	3	3	4	5	3	2
HOM000992	2	2	5	4	4	11	6	13	7	5	6	9	4	7	4	3	8	1	1
HOM000993	6	6	3	4	4	10	9	8	4	3	5	7	3	5	5	4	5	2	2
HOM000994	7	6	5	3	6	8	3	13	4	8	4	5	3	5	4	4	5	6	5
HOM000995	11	10	4	4	3	7	3	15	7	3	6	7	4	6	4	2	8	2	1
HOM000996	3	3	6	4	7	7	8	10	5	3	4	5	7	4	5	5	8	4	5
HOM000997	9	5	5	3	6	9	7	11	3	5	5	8	2	3	4	4	4	3	3
HOM000998	2	2	1	2	42	1	1	45	1	1	1	3	1	1	1	1	1	1	1
HOM000999	5	6	3	5	9	8	1	15	4	0	3	6	6	2	7	8	5	8	7
HOM001001	6	5	4	6	5	5	2	18	6	3	4	5	4	3	4	4	6	2	2
HOM001002	3	3	6	3	3	16	6	9	3	1	8	4	3	5	3	4	9	3	3
HOM001003	6	4	3	3	4	8	10	16	4	6	3	5	3	3	3	3	3	4	4
HOM001004	4	5	6	3	3	7	7	12	4	4	4	3	4	4	5	4	4	4	3
HOM001005	5	5	4	4	3	15	7	6	6	12	3	11	6	2	5	5	5	3	2
HOM001006	6	4	7	3	3	7	5	5	6	1	7	7	4	9	3	3	12	3	2
HOM001007	5	4	6	4	8	11	6	3	7	4	4	10	5	5	6	5	6	5	5
HOM001008	6	6	3	4	5	10	3	19	8	4	4	8	3	3	4	5	7	3	1
HOM001009	14	5	4	5	2	4	6	4	5	7	5	6	2	4	3	2	9	2	4
HOM001010	6	4	4	2	4	7	7	11	8	3	3	6	4	3	4	4	5	5	18
HOM001011	4	3	4	5	5	12	5	10	5	3	5	6	5	6	4	3	7	5	5
HOM001012	5	5	5	4	4	14	6	11	6	5	4	6	4	7	5	4	7	5	3
HOM001013	6	5	4	6	3	9	9	9	7	2	7	7	3	4	5	3	6	4	5
HOM001014	5	5	5	10	3	8	5	14	5	4	7	6	4	6	4	4	5	2	2
HOM001016	4	3	1	2	3	2	22	2	3	17	5	3	6	3	6	6	6	2	2
HOM001017	3	3	3	4	6	8	11	10	6	9	4	5	6	4	8	5	6	3	2
HOM001018	5	3	6	8	3	9	6	7	8	7	4	10	4	4	6	6	3	3	2
HOM001019	9	8	3	3	4	10	4	22	5	1	6	6	4	2	3	2	5	4	4
HOM001020	3	4	4	4	4	8	4	10	6	3	4	11	4	4	8	3	4	3	3
HOM001021	4	4	3	4	3	5	3	19	7	4	3	11	4	3	3	5	5	6	25
HOM001022	5	5	5	4	5	9	10	14	7	5	5	5	4	5	4	4	6	6	8
HOM001023	5	5	5	3	5	8	3	11	7	4	5	7	4	4	4	4	5	4	2
HOM001024	7	6	4	5	5	8	7	9	6	7	3	6	4	4	4	4	6	4	3
HOM001025	9	5	5	4	4	8	5	9	5	3	6	5	3	5	3	4	6	3	2
HOM001027	2	6	5	1	4	7	4	7	7	5	10	10	4	5	11	3	5	4	2
HOM001028	2	2	3	5	4	5	4	20	5	2	5	14	3	4	3	6	6	4	4
HOM001030	4	4	4	3	4	8	3	11	6	4	6	10	4	4	4	4	4	4	3
HOM001031	4	4	4	5	3	10	5	4	7	5	4	7	4	10	3	4	9	2	2
HOM001032	1	3	2	12	5	8	4	10	4	10	3	7	4	6	2	5	5	5	4
HOM001033	6	6	5	4	2	8	7	12	6	4	4	5	4	3	4	4	6	3	3
HOM001034	7	7	4	2	3	10	5	13	3	5	6	4	2	4	2	3	4	3	2
HOM001035	3	4	4	5	3	8	3	7	5	4	4	5	4	4	6	4	7	3	3
HOM001036	4	4	7	4	4	9	3	10	8	1	6	8	5	6	3	4	9	6	5
HOM001037	8	6	4	3	7	9	4	9	8	4	5	9	3	3	10	4	6	3	3
HOM001038	8	6	7	4	3	10	2	8	6	2	7	10	4	7	5	2	9	3	3
HOM001039	5	5	6	3	3	13	4	10	5	4	8	4	3	4	3	4	7	3	3
HOM001040	7	5	6	5	8	7	3	18	2	0	6	3	3	5	4	4	6	4	4
HOM001041	5	5	4	2	4	9	3	16	5	1	5	5	3	4	4	5	4	4	4
HOM001042	7	4	4	4	4	12	3	4	7	3	5	8	4	11	2	3	7	2	1
HOM001043	5	4	4	4	5	6	6	7	5	3	3	6	5	6	3	12	9	7	4
HOM001044	4	3	5	2	3	9	3	11	6	3	6	7	4	5	4	4	6	5	5
HOM001045	9	6	4	3	3	6	1	8	5	3	5	5	3	4	5	4	8	2	14
HOM001046	3	2	4	1	5	6	7	24	5	3	5	6	2	5	3	5	6	5	5
HOM001047	5	4	3	4	4	6	8	6	7	6	3	9	3	6	4	6	8	2	4
HOM001048	5	5	5	4	6	6	5	5	5	3	6	7	4	4	3	4	8	5	2
HOM001049	3	3	2	3	3	13	8	8	8	6	3	6	4	4	5	9	3	7	8
HOM001050	7	5	5	2	3	6	5	12	4	3	5	7	2	6	4	4	14	4	3
HOM001051	3	3	6	6	2	9	5	18	6	5	7	6	3	4	2	3	5	3	3
HOM001052	5	4	4	4	3	5	3	7	4	2	4	5	3	4	3	4	7	5	5
HOM001053	4	3	3	2	6	3	6	23	3	1	5	5	3	2	4	5	4	1	1
HOM001054	4	3	4	3	4	8	8	20	4	2	5	5	3	5	4	3	6	4	4
HOM001055	4	4	4	4	3	7	5	11	5	7	3	8	4	5	6	3	6	5	5
HOM001056	6	4	5	4	6	13	5	4	6	4	6	7	3	6	4	4	9	4	3
HOM001057	3	3	4	2	3	12	6	16	4	5	5	6	3	4	3	1	5	4	6
HOM001058	3	4	5	3	5	5	3	16	4	8	5	5	3	6	6	4	8	2	1
HOM001059	6	5	3	4	5	8	4	16	4	5	3	7	4	2	5	2	2	4	3
HOM001060	5	5	6	4	5	8	5	7	5	3	6	7	5	6	4	3	8	4	3
HOM001061	5	4	8	3	4	5	3	5	4	2	9	5	3	10	4	3	9	2	2
HOM001062	4	4	5	5	4	6	3	12	3	2	6	4	4	4	3	3	6	3	4
HOM001063	4	3	4	5	5	10	3	8	5	8	5	8	3	4	4	4	7	5	4
HOM001064	4	2	18	1	8	8	3	15	3	18	3	3	0	8	2	1	6	1	1
HOM001065	7	8	7	0	1	5	3	13	2	5	10	3	3	8	4	2	10	6	6
HOM001066	5	5	3	4	5	14	7	9	6	2	3	5	4	3	4	5	4	8	6
HOM001067	7	6	5	5	5	8	4	13	5	4	5	5	2	5	5	3	9	3	3
HOM001068	6	6	5	4	6	8	3	11	7	4	5	7	4	5	5	4	7	4	2
HOM001069	8	13	2	5	11	9	1	6	4	4	5	12	2	7	6	2	3	3	3
HOM001070	2	2	3	3	8	7	1	27	5	11	3	6	3	4	4	3	8	8	4
HOM001071	6	5	3	4	5	10	8	10	5	6	5	7	3	3	4	4	6	6	4
HOM001072	6	5	5	3	5	11	5	4	7	2	6	7	3	5	4	4	11	8	4
HOM001073	1	1	6	2	6	7	4	4	5	3	7	7	4	8	4	4	7	1	1
HOM001074	4	4	4	3	3	7	2	14	5	7	4	11	3	5	3	4	6	3	3
HOM001075	6	6	4	4	4	8	4	10	6	2	5	7	5	5	5	7	5	6	5
HOM001076	4	3	6	3	3	13	7	9	8	12	5	6	4	5	4	2	5	3	2
HOM001077	5	6	6	4	3	11	6	5	7	1	8	9	3	7	3	4	8	4	4
HOM001078	5	4	4	5	4	6	3	9	6	5	5	10	5	5	5	3	10	3	3
HOM001079	3	3	5	5	4	13	10	11	5	4	5	6	4	4	6	5	4	4	2
HOM001080	6	5	5	2	3	5	1	11	4	2	7	9	3	5	3	3	10	3	1
HOM001081	5	2	3	4	2	3	19	1	3	11	11	4	0	3	4	4	4	1	1
HOM001082	3	3	4	3	5	9	6	11	4	2	4	5	4	2	3	3	7	4	3
HOM001083	3	3	4	5	6	7	2	14	10	5	2	7	5	3	6	5	6	3	4
HOM001084	5	4	3	3	5	8	3	14	4	5	3	5	3	3	3	4	5	3	2
HOM001085	6	7	4	2	5	9	4	7	5	5	7	7	4	7	4	3	6	1	1
HOM001086	43	43	1	1	1	1	1	1	1	1	1	1	1	1	1	1	1	1	1
HOM001087	11	8	3	3	8	8	4	12	4	0	3	6	3	3	3	9	6	2	2
HOM001088	4	3	4	3	5	10	4	11	5	4	4	5	4	4	3	3	14	5	3
HOM001089	4	4	4	4	4	9	4	9	4	7	4	6	4	6	3	4	6	3	3
HOM001090	4	4	4	4	4	11	4	8	5	7	5	10	6	7	5	1	6	3	2
HOM001091	4	4	5	2	2	9	2	7	5	6	8	5	3	5	3	3	11	4	4
HOM001092	5	5	3	6	3	9	4	13	7	3	4	8	3	2	3	4	3	3	2
HOM001094	4	3	10	2	8	13	6	3	4	3	5	10	5	5	3	4	3	2	2
HOM001095	4	4	2	2	4	8	4	11	5	3	2	7	3	3	7	3	16	10	6
HOM001096	7	6	4	3	7	7	5	16	7	2	6	6	4	5	3	3	6	2	1
HOM001097	7	6	6	5	3	11	4	7	6	3	6	6	3	4	3	3	6	5	4
HOM001099	5	5	4	2	3	10	5	11	6	5	5	7	3	3	4	3	5	4	5
HOM001100	6	6	6	2	5	8	3	6	10	2	7	7	6	6	5	4	6	1	1
HOM001101	7	5	3	3	4	11	5	11	7	4	3	5	4	5	4	4	8	4	3
HOM001102	3	3	3	4	4	11	3	13	8	6	4	8	5	4	5	5	5	3	3
HOM001104	2	3	3	2	2	4	4	12	4	3	8	3	4	3	3	2	5	3	9
HOM001105	4	5	3	4	3	12	4	14	7	2	4	4	4	3	4	4	9	5	2
HOM001106	4	4	4	5	3	11	4	18	5	4	4	5	5	4	5	5	4	2	1
HOM001107	4	4	4	5	4	8	1	10	8	4	4	9	5	3	5	5	7	6	5
HOM001108	4	4	3	3	4	10	2	11	8	7	5	6	4	6	3	4	7	2	2
HOM001109	5	3	4	1	5	8	4	8	5	5	4	7	3	5	4	6	4	4	4
HOM001110	4	3	4	3	3	5	5	11	6	2	4	6	3	6	3	3	5	2	3
HOM001111	5	4	5	4	5	9	3	8	6	5	5	7	4	7	5	4	7	10	18
HOM001112	8	6	2	3	3	6	3	14	4	5	3	5	4	3	4	8	4	3	5
HOM001113	5	5	4	3	3	6	3	7	6	2	6	5	4	5	3	4	11	4	8
HOM001114	4	3	5	5	5	6	5	9	6	6	5	6	5	4	4	4	7	5	3
HOM001115	4	4	4	4	2	10	8	9	5	3	4	7	3	4	3	5	4	6	8
HOM001116	4	4	4	5	5	7	3	13	5	3	4	6	4	5	2	3	6	5	6
HOM001117	4	4	3	3	3	6	1	28	3	5	3	5	4	3	3	3	5	4	3
HOM001118	8	8	2	2	6	4	3	10	8	7	2	4	3	2	11	5	2	3	4
HOM001119	3	3	4	2	2	6	2	12	5	3	4	6	4	8	4	5	10	2	2
HOM001120	4	4	5	3	3	8	5	6	6	4	6	7	3	8	3	3	9	2	1
HOM001121	2	2	3	4	5	7	3	12	5	7	6	8	4	2	5	4	8	4	3
HOM001122	8	7	3	3	2	10	4	7	6	4	4	14	5	5	5	5	4	5	4
HOM001123	4	4	3	4	4	6	4	10	7	4	3	8	3	3	5	3	6	3	3
HOM001124	4	5	5	3	3	8	3	11	4	5	5	4	2	5	2	2	19	2	2
HOM001126	6	5	8	5	4	6	3	7	5	1	5	6	3	4	3	3	8	7	6
HOM001127	4	3	5	3	5	10	3	10	5	2	5	5	3	4	4	3	6	5	2
HOM001128	6	3	3	2	2	7	4	11	3	1	3	4	3	8	4	5	4	4	4
HOM001130	7	4	5	3	4	8	5	4	7	4	4	5	5	4	5	3	4	2	2
HOM001131	4	4	3	4	4	9	5	5	4	7	11	5	4	7	3	3	3	3	3
HOM001132	7	6	5	2	2	12	1	20	5	0	4	8	4	5	3	3	3	4	2
HOM001133	4	3	5	5	4	8	3	16	5	4	4	10	5	4	4	4	6	4	22
HOM001134	6	5	4	3	6	9	4	8	9	3	5	10	4	3	4	5	6	5	3
HOM001135	4	3	4	4	6	8	1	8	4	7	6	4	6	6	5	4	8	3	3
HOM001136	4	4	5	7	3	7	3	9	6	2	5	8	4	4	4	4	8	5	3
HOM001137	4	4	4	5	4	7	3	6	6	2	6	6	5	5	4	4	5	3	2
HOM001138	6	7	7	3	2	6	3	11	5	6	5	7	3	7	2	2	6	3	3
HOM001139	5	5	4	4	7	11	5	7	7	3	4	7	3	5	5	5	4	4	3
HOM001140	3	3	3	3	4	5	5	10	5	3	5	5	4	4	3	3	6	5	2
HOM001142	4	6	5	4	4	10	0	10	5	5	6	7	5	4	3	4	5	2	1
HOM001143	5	5	4	2	7	8	4	14	7	3	3	4	4	3	4	4	7	11	9
HOM001144	4	4	4	4	6	6	2	14	7	4	4	7	3	5	4	6	5	3	2
HOM001145	4	3	6	6	3	7	7	4	6	1	6	6	6	3	3	5	5	5	2
HOM001146	11	6	3	4	5	14	5	5	5	5	3	8	3	5	5	1	3	2	2
HOM001147	5	4	3	3	5	7	6	7	3	3	5	4	3	4	3	3	3	3	3
HOM001148	7	4	5	5	4	8	1	10	4	3	5	5	3	6	4	4	8	3	3
HOM001149	3	2	8	3	3	8	3	7	5	3	8	5	3	9	3	3	12	2	2
HOM001151	3	3	3	3	4	13	7	11	7	5	3	6	4	5	4	4	5	3	3
HOM001153	3	3	4	3	4	9	2	11	8	6	4	8	4	4	5	4	7	5	3
HOM001154	6	4	2	3	2	6	10	10	4	6	3	6	5	4	5	3	9	4	2
HOM001155	5	6	3	3	3	8	5	13	5	3	3	7	4	6	4	5	2	3	3
HOM001156	6	3	2	2	10	4	4	9	4	1	4	3	5	2	3	5	2	2	2
HOM001157	6	6	3	4	3	9	2	13	6	5	3	6	3	4	3	3	5	4	2
HOM001159	7	8	3	2	2	26	0	5	4	7	4	9	3	1	5	1	8	2	2
HOM001160	2	2	3	3	5	7	2	7	5	1	4	7	4	5	5	4	5	2	2
HOM001161	16	2	3	1	2	2	5	25	1	6	2	2	2	14	1	1	2	1	1
HOM001162	6	5	4	2	2	10	5	10	5	8	4	6	3	3	3	3	5	5	6
HOM001163	5	3	5	3	3	8	2	6	4	5	6	6	5	4	6	3	4	4	6
HOM001164	7	5	3	3	4	6	5	10	6	2	4	4	3	3	5	4	6	4	3
HOM001166	6	4	3	3	7	10	5	13	4	2	4	5	3	3	4	4	4	3	3
HOM001169	6	6	3	4	3	9	7	9	4	4	3	5	3	2	3	3	5	5	3
HOM001170	4	4	2	4	5	3	4	12	4	1	4	8	3	7	2	2	5	2	2
HOM001171	2	3	3	4	2	7	6	13	4	3	4	7	3	3	4	3	3	3	2
HOM001172	5	5	5	3	4	7	4	11	4	3	5	5	3	5	3	3	5	2	1
HOM001173	4	4	5	5	4	5	4	6	6	5	5	6	4	5	5	3	10	4	4
HOM001174	4	3	3	5	5	6	3	22	4	3	4	5	3	1	3	3	6	8	5
HOM001176	2	2	6	4	4	9	2	2	7	3	3	6	3	5	4	4	4	3	3
HOM001177	3	3	3	2	4	10	2	6	5	17	3	7	3	3	2	2	5	4	2
HOM001178	3	3	3	4	3	5	2	20	5	3	2	5	3	2	5	2	4	4	9
HOM001179	3	3	2	3	3	9	2	19	4	2	3	6	3	1	3	8	3	4	22
HOM001180	2	2	3	3	4	7	7	14	7	4	2	6	4	1	4	5	2	2	2
HOM001181	5	3	4	5	6	7	5	10	5	10	4	7	3	4	4	5	2	3	3
HOM001183	5	5	4	4	3	6	2	15	4	0	4	6	3	5	3	3	6	3	3
HOM001184	5	4	4	4	3	7	4	11	3	7	4	5	3	4	3	4	8	2	2
HOM001185	7	5	4	6	5	9	4	12	6	1	4	4	3	3	4	3	5	4	3
HOM001186	4	4	3	6	3	7	5	7	4	4	4	3	3	4	5	3	6	5	6
HOM001187	3	3	3	3	5	11	6	4	4	17	3	3	5	3	7	5	5	4	3
HOM001188	2	3	4	2	2	3	2	4	5	5	4	4	2	4	2	2	3	5	4
HOM001189	5	6	6	2	4	7	2	16	4	2	5	4	4	3	4	3	6	4	11
HOM001190	3	3	5	2	3	5	2	6	7	2	4	3	5	4	2	5	4	2	2
HOM001191	8	7	5	5	3	8	3	9	4	3	6	5	2	6	2	2	9	4	3
HOM001192	3	3	4	4	4	10	4	8	5	4	4	5	3	6	3	4	10	4	3
HOM001194	4	4	4	4	5	10	6	9	6	3	4	8	3	3	3	5	6	4	5
HOM001195	5	5	4	5	4	12	6	3	4	6	4	8	5	4	5	2	8	4	4
HOM001196	3	4	5	4	2	6	4	6	4	5	7	5	2	3	4	3	4	1	1
HOM001199	2	2	1	3	2	9	4	8	5	4	9	10	4	6	4	1	12	2	1
HOM001200	4	3	5	3	8	12	4	8	5	8	5	5	3	5	3	4	5	3	13
HOM001201	3	3	3	3	3	6	2	7	4	4	4	5	9	4	3	3	4	4	15
HOM001202	4	3	3	3	3	10	5	3	5	1	6	5	3	6	3	8	10	3	3
HOM001203	6	3	4	4	2	6	7	5	6	1	4	7	3	4	5	4	5	5	5
HOM001204	2	5	3	5	5	11	5	10	6	1	5	10	5	4	4	4	7	2	3
HOM001205	5	5	4	3	4	8	3	6	8	2	5	7	4	5	4	4	9	4	3
HOM001206	6	5	7	4	6	10	3	8	5	8	4	5	3	2	5	4	6	3	3
HOM001207	4	2	2	7	2	4	6	11	4	10	2	5	2	4	2	2	7	3	3
HOM001208	7	5	2	3	5	7	4	7	6	5	2	4	3	2	3	3	3	2	2
HOM001209	5	4	6	3	3	9	6	8	4	2	4	7	3	5	3	4	4	4	3
HOM001211	4	4	4	5	4	13	8	6	5	8	3	5	4	6	3	3	3	1	1
HOM001212	6	5	5	3	3	10	3	6	6	4	6	5	3	5	3	3	8	5	3
HOM001213	4	4	4	4	2	8	4	14	6	4	5	6	4	6	3	3	5	3	6
HOM001214	4	3	2	6	3	4	4	13	3	4	3	4	2	7	2	7	2	4	4
HOM001215	7	7	5	5	5	7	10	4	4	3	2	5	3	1	4	3	2	2	2
HOM001216	6	6	5	4	2	8	4	5	7	5	4	8	3	4	3	5	5	3	3
HOM001217	5	9	1	1	10	6	4	11	4	0	2	5	4	2	6	8	3	1	1
HOM001218	3	3	3	5	4	8	8	10	4	3	3	4	3	2	4	5	5	4	4
HOM001219	1	1	3	2	4	5	3	1	7	1	11	9	8	8	5	8	2	1	1
HOM001220	4	4	4	5	5	8	3	5	6	4	4	6	3	4	2	5	8	4	4
HOM001221	2	2	2	5	4	5	12	11	2	16	2	9	2	2	2	5	3	2	2
HOM001222	4	4	3	4	3	8	3	7	4	3	3	6	3	4	4	3	5	3	3
HOM001223	9	9	3	2	2	5	3	7	3	4	3	5	3	3	3	3	3	4	2
HOM001224	5	6	4	2	4	10	6	3	6	6	3	7	5	3	5	5	5	5	3
HOM001225	5	6	4	5	4	5	2	7	6	5	6	7	3	3	3	4	9	5	7
HOM001226	5	5	5	3	3	5	2	7	4	7	4	5	4	4	3	4	4	4	10
HOM001227	4	4	4	2	2	6	4	8	3	2	4	4	5	3	2	5	6	5	3
HOM001228	4	4	3	4	3	13	4	7	5	12	3	6	5	3	4	2	4	2	2
HOM001229	2	3	3	6	3	7	10	6	6	4	3	6	4	3	6	4	4	2	2
HOM001230	5	5	3	4	4	10	4	6	5	5	4	5	3	5	5	1	7	4	3
HOM001231	2	2	3	3	4	6	2	16	5	0	3	6	4	2	3	3	8	2	3
HOM001232	6	4	3	5	4	21	2	4	3	1	4	4	3	2	2	14	3	2	2
HOM001233	6	6	4	3	4	6	6	9	5	9	4	3	3	2	4	3	5	2	2
HOM001234	3	3	3	3	3	6	3	9	4	2	3	4	3	4	3	12	8	3	2
HOM001235	3	3	4	4	7	8	2	9	5	2	4	6	3	2	6	4	7	7	4
HOM001239	3	3	9	3	3	10	3	10	6	1	5	5	3	4	3	2	6	2	2
HOM001240	3	3	3	7	5	8	8	8	5	1	1	8	4	4	4	4	5	5	4
HOM001241	3	3	3	2	3	12	9	11	6	3	3	4	3	3	6	3	5	2	1
HOM001242	7	4	6	1	2	7	2	8	3	2	6	5	3	5	3	4	9	3	5
HOM001243	6	4	1	3	2	11	7	15	4	4	2	5	2	1	3	5	1	4	3
HOM001244	6	4	3	2	2	6	4	11	5	1	4	5	4	4	3	2	7	2	2
HOM001245	2	5	5	3	5	5	2	7	3	4	7	4	3	4	4	6	7	2	2
HOM001247	9	9	5	3	3	6	4	1	6	2	5	6	3	5	2	2	15	3	3
HOM001248	3	3	4	2	3	5	4	11	4	1	3	5	2	5	2	2	5	4	4
HOM001249	11	10	3	4	3	9	4	6	5	2	4	5	3	2	3	3	4	3	3
HOM001251	4	5	6	3	3	8	4	5	4	5	4	5	2	7	6	3	5	2	2
HOM001253	2	2	1	20	1	32	6	8	3	2	2	3	2	1	2	1	2	1	1
HOM001254	3	3	3	4	4	6	3	10	3	3	3	6	3	4	3	3	3	3	3
HOM001255	6	4	2	3	5	4	2	26	2	3	2	3	2	2	2	5	1	2	2
HOM001256	6	6	4	3	3	5	6	12	7	4	4	2	4	5	4	3	4	1	1
HOM001257	6	5	4	4	2	5	2	7	5	5	4	4	3	3	2	3	7	5	6
HOM001258	4	4	4	4	3	7	3	8	5	3	4	7	5	4	3	5	6	3	2
HOM001259	2	2	2	4	3	16	4	6	9	5	4	8	5	1	4	9	4	2	1
HOM001260	3	2	5	3	3	4	3	13	3	5	5	3	2	5	2	4	8	2	2
HOM001261	1	1	2	1	2	33	12	7	1	11	1	6	2	1	1	1	1	3	2
HOM001263	3	3	2	3	2	9	4	15	5	3	4	4	4	3	4	4	5	3	2
HOM001264	3	3	3	7	3	8	4	11	5	5	4	4	3	3	3	3	5	4	3
HOM001266	2	2	16	2	1	5	1	4	2	3	9	3	2	14	3	2	7	3	2
HOM001267	4	4	5	3	3	6	6	7	6	4	5	4	3	4	3	4	6	3	2
HOM001268	5	5	4	3	3	8	4	8	6	4	3	4	3	3	5	4	4	3	3
HOM001269	5	4	3	4	5	13	3	9	5	2	4	5	4	5	4	3	4	4	4
HOM001270	3	3	4	3	2	7	3	10	5	4	6	4	3	8	4	4	6	1	1
HOM001271	5	2	3	3	2	3	1	15	4	2	3	4	11	4	3	3	2	3	18
HOM001272	3	4	10	2	2	5	2	7	2	0	11	4	2	9	2	4	11	5	4
HOM001273	1	2	1	1	2	7	8	28	2	7	1	7	2	1	2	12	1	1	1
HOM001274	2	2	3	5	4	6	5	9	3	3	3	4	3	3	6	4	3	3	2
HOM001275	5	5	5	3	3	7	3	11	4	6	5	4	2	4	4	5	3	2	1
HOM001276	11	5	2	3	3	7	4	8	2	4	3	4	3	4	2	2	5	3	14
HOM001278	3	3	3	4	5	7	4	6	5	3	4	8	5	3	3	4	3	3	5
HOM001279	5	5	4	4	4	10	4	10	4	1	4	8	5	5	5	4	5	1	2
HOM001280	7	9	0	1	14	2	1	32	1	1	0	3	1	0	3	1	0	3	2
HOM001281	4	3	4	1	2	4	1	7	4	0	4	7	3	3	4	3	8	4	2
HOM001282	5	5	5	3	4	6	4	9	4	0	5	3	4	5	4	3	4	4	3
HOM001284	3	3	3	3	8	4	4	10	3	3	3	5	3	3	2	3	4	2	3
HOM001285	3	2	5	3	3	4	2	8	4	3	4	4	2	3	2	5	4	2	2
HOM001287	2	2	4	2	2	4	1	9	5	7	4	7	3	4	4	3	6	9	20
HOM001289	2	2	4	2	5	7	3	7	5	7	5	3	6	3	1	11	4	3	2
HOM001292	3	3	3	4	3	9	5	8	5	6	3	5	4	3	3	3	5	3	3
HOM001293	5	6	4	4	8	9	5	3	4	4	3	6	5	3	8	3	3	2	1
HOM001294	1	3	3	2	2	8	7	5	3	9	6	4	2	1	4	11	3	2	2
HOM001295	5	3	4	2	2	9	4	11	3	3	3	4	3	3	6	2	4	3	2
HOM001296	2	3	2	3	3	5	1	12	3	3	10	5	1	6	3	5	3	16	24
HOM001297	3	3	3	3	3	5	4	9	3	3	4	5	4	2	4	3	5	3	3
HOM001298	5	5	3	3	2	7	3	6	5	2	4	7	4	4	3	2	4	4	2
HOM001299	5	4	6	2	2	4	6	5	4	2	6	4	2	2	2	2	9	5	3
HOM001300	3	2	2	2	3	6	4	11	4	4	4	4	5	2	7	3	5	5	4
HOM001301	3	3	5	4	3	2	3	7	3	7	1	4	2	3	2	4	4	6	16
HOM001302	4	3	5	2	4	10	5	6	4	9	4	4	3	3	3	3	6	5	4
HOM001303	5	5	2	3	4	8	2	16	8	4	2	4	4	2	5	1	3	1	1
HOM001304	3	3	3	2	3	5	3	8	6	3	5	4	2	2	2	2	6	1	2
HOM001305	2	2	4	2	5	9	6	9	4	7	4	6	3	1	4	5	4	3	3
HOM001307	5	5	3	3	3	6	3	13	5	3	4	7	2	2	4	3	5	2	1
HOM001311	4	3	3	3	3	7	3	14	5	1	3	5	5	2	5	3	8	3	3
HOM001312	4	5	3	3	5	2	2	1	11	2	4	6	10	6	8	2	3	1	1
HOM001313	4	4	1	2	3	9	4	8	6	2	9	6	3	6	3	3	3	3	8
HOM001314	5	3	6	3	4	6	3	10	2	5	4	5	2	3	3	3	6	3	2
HOM001315	3	3	3	3	3	6	5	5	5	3	3	4	3	3	3	3	6	4	4
HOM001316	5	5	3	3	4	8	4	6	5	3	2	6	4	4	4	3	5	2	1
HOM001317	2	2	6	2	2	6	4	6	2	18	3	4	2	4	2	3	6	2	5
HOM001319	7	4	9	2	4	4	1	6	4	3	4	4	5	8	5	3	5	4	4
HOM001320	4	5	3	3	5	6	5	5	5	4	3	4	3	3	3	3	4	4	4
HOM001321	5	4	8	3	6	5	2	6	3	5	6	5	3	6	4	2	7	1	1
HOM001322	4	4	4	3	4	6	8	10	5	1	4	6	4	4	4	5	4	4	4
HOM001326	3	3	3	2	2	4	5	8	6	2	3	4	4	4	9	3	3	3	3
HOM001327	3	2	6	1	3	4	5	6	2	3	9	5	2	10	2	4	8	1	1
HOM001328	4	4	3	3	5	8	2	12	7	3	3	4	4	3	5	3	5	3	3
HOM001329	5	3	3	3	4	5	3	8	2	3	3	4	4	3	2	6	7	2	2
HOM001330	5	4	3	3	4	8	4	9	8	2	3	7	4	2	4	4	4	7	10
HOM001332	3	2	7	3	3	4	2	11	5	1	5	4	2	11	4	2	10	1	1
HOM001334	2	2	3	4	7	6	1	6	4	4	4	5	3	3	3	3	5	5	13
HOM001335	4	4	4	3	4	5	1	6	5	2	4	7	3	5	4	4	4	1	1
HOM001336	7	7	4	5	7	5	3	6	4	3	3	4	5	5	5	2	5	3	1
HOM001337	2	2	4	2	2	6	1	6	6	5	4	4	2	3	2	2	8	2	2
HOM001338	2	2	4	3	3	5	4	6	4	5	3	3	3	7	2	3	12	2	2
HOM001340	3	3	3	5	2	10	4	5	5	2	4	5	4	2	4	8	3	4	2
HOM001341	5	5	2	3	1	8	4	3	4	4	3	6	3	2	2	5	6	2	3
HOM001342	7	7	3	3	5	8	4	6	6	2	4	5	3	3	3	3	4	5	4
HOM001343	4	4	3	3	3	9	2	8	6	0	3	9	6	3	4	4	7	10	10
HOM001344	4	5	0	0	5	7	3	9	12	5	0	20	4	1	7	5	0	1	5
HOM001346	7	6	5	2	3	5	3	7	3	4	4	4	3	4	4	2	6	3	2
HOM001348	1	1	3	3	3	8	3	12	3	9	3	8	3	2	3	3	3	1	5
HOM001350	2	3	3	5	2	8	8	8	6	4	3	7	3	2	7	3	4	2	1
HOM001351	3	3	3	3	2	6	3	5	3	3	4	3	3	3	3	3	4	3	3
HOM001352	6	5	5	4	2	7	2	2	5	1	6	6	4	4	5	5	7	5	5
HOM001354	5	4	4	4	4	6	4	7	5	6	4	4	3	4	3	4	6	4	3
HOM001355	3	2	3	2	4	5	1	14	2	6	4	5	4	3	3	4	5	3	3
HOM001356	2	2	2	5	2	4	5	3	3	7	2	3	2	2	2	2	2	2	1
HOM001357	2	4	2	2	4	6	2	6	2	2	5	4	2	5	3	2	4	3	1
HOM001358	5	4	1	3	5	11	5	12	7	1	1	11	4	1	5	3	2	2	1
HOM001359	4	3	4	3	1	3	3	9	4	3	4	2	2	5	7	2	5	4	13
HOM001360	9	5	4	4	3	7	1	14	6	2	3	5	3	2	3	3	4	3	3
HOM001361	4	3	4	3	2	7	3	9	4	3	3	7	3	4	2	3	7	3	4
HOM001362	2	3	3	3	4	5	7	5	3	1	4	4	5	3	4	3	5	3	3
HOM001364	5	4	3	3	3	6	5	8	6	3	3	6	3	3	3	3	5	5	4
HOM001365	5	3	3	2	2	8	3	9	4	3	3	3	3	3	2	4	5	1	2
HOM001366	5	3	3	3	5	6	0	10	6	2	2	8	4	2	4	4	7	4	3
HOM001367	3	3	3	3	3	5	3	6	3	3	3	4	4	3	3	3	3	3	3
HOM001370	6	4	0	2	1	6	13	4	7	20	0	11	1	0	3	7	0	4	1
HOM001371	5	5	5	2	2	2	1	10	3	2	5	5	3	8	3	4	11	5	5
HOM001372	3	3	4	5	3	12	2	3	6	3	3	9	5	4	9	4	3	1	1
HOM001373	7	6	4	2	2	6	8	8	2	3	4	4	2	8	3	2	4	3	2
HOM001375	7	6	2	4	5	8	3	9	5	4	2	5	4	2	5	3	2	3	2
HOM001376	3	4	4	4	4	11	6	7	6	11	2	4	4	2	3	3	5	2	2
HOM001377	2	2	1	1	4	8	7	16	2	5	3	3	1	1	3	3	8	4	1
HOM001378	1	1	4	2	5	7	4	11	4	3	5	4	3	2	3	2	10	1	1
HOM001380	3	4	2	2	3	9	4	11	5	2	2	6	3	3	3	3	4	3	5
HOM001381	2	3	6	2	3	5	7	13	2	0	4	4	3	3	3	7	4	2	2
HOM001382	3	3	2	5	3	8	5	11	4	4	2	5	4	2	5	4	4	7	5
HOM001383	3	3	4	3	3	7	5	5	3	7	3	6	4	3	2	3	3	3	3
HOM001384	3	4	4	4	1	5	4	7	5	1	4	4	3	2	3	3	8	4	4
HOM001386	2	2	2	3	8	9	2	9	3	4	5	4	2	3	2	3	8	4	2
HOM001387	6	6	2	5	4	6	7	7	6	6	2	10	3	1	5	2	2	2	1
HOM001388	3	5	2	6	6	6	4	9	7	8	4	7	4	2	2	5	3	4	4
HOM001389	4	4	5	4	3	10	3	1	5	4	6	7	2	4	4	5	5	3	1
HOM001390	4	4	4	4	3	10	3	7	3	2	5	4	4	7	4	4	5	5	4
HOM001391	3	3	3	1	5	7	2	21	3	2	3	4	2	3	4	2	4	6	20
HOM001392	7	5	1	4	1	6	5	5	4	3	1	4	3	1	6	2	3	2	2
HOM001393	0	1	0	0	1	2	1	3	2	0	0	4	1	0	1	1	0	1	2
HOM001394	4	3	4	3	2	4	3	7	2	0	4	7	3	4	4	5	5	3	3
HOM001395	4	3	4	2	1	4	1	1	1	1	11	2	1	7	1	1	7	1	1
HOM001396	2	2	6	3	3	5	3	5	5	2	5	4	3	4	3	3	6	2	2
HOM001397	4	3	3	1	3	9	4	8	5	5	3	12	3	3	3	3	2	2	2
HOM001398	3	3	5	4	5	6	2	13	4	2	5	4	2	4	2	4	6	3	1
HOM001399	4	3	4	2	3	5	1	11	9	2	4	5	3	3	3	3	6	3	3
HOM001400	4	4	4	4	2	5	5	8	5	2	4	3	3	4	4	4	4	2	1
HOM001401	4	3	4	4	2	6	0	7	4	4	3	3	3	2	5	3	8	2	1
HOM001402	3	3	6	3	4	6	3	5	3	0	5	6	3	6	3	3	6	5	2
HOM001403	3	3	3	4	4	7	3	7	7	3	4	6	3	5	3	3	6	4	4
HOM001405	5	5	3	3	3	7	6	7	4	3	3	4	4	3	4	4	4	1	1
HOM001407	4	3	3	2	1	9	9	7	4	2	5	4	2	4	4	4	5	2	3
HOM001408	4	4	8	3	2	6	4	2	4	5	5	6	5	8	1	3	7	1	1
HOM001410	3	4	2	5	6	7	3	12	4	2	3	4	3	2	5	3	3	4	6
HOM001412	2	2	3	2	3	20	1	8	7	3	6	4	5	2	5	3	3	2	2
HOM001413	2	2	6	2	1	4	2	5	2	1	10	3	2	9	2	2	5	2	1
HOM001415	3	3	3	4	3	10	5	7	7	4	3	10	4	3	4	2	5	4	4
HOM001416	3	4	3	3	5	4	10	7	4	1	5	4	4	3	3	4	4	2	3
HOM001417	3	3	3	3	2	5	7	10	3	3	3	4	3	2	3	4	5	3	12
HOM001418	2	2	3	2	14	5	3	10	4	3	2	6	2	2	2	5	2	8	7
HOM001420	5	5	3	4	6	12	5	5	6	3	1	10	3	1	4	3	2	3	2
HOM001421	2	2	4	3	2	6	4	9	4	2	3	5	9	3	3	3	3	4	4
HOM001422	4	4	3	4	3	8	3	7	6	2	4	4	3	1	3	4	5	3	2
HOM001424	8	10	1	1	9	8	2	11	4	4	2	5	3	1	2	1	3	4	3
HOM001425	3	3	5	3	3	9	1	7	8	4	4	6	4	4	4	3	6	3	2
HOM001426	3	3	7	2	2	2	2	7	8	3	6	5	8	6	3	1	3	3	2
HOM001427	2	2	3	4	3	6	3	14	4	4	3	5	5	3	3	5	4	2	2
HOM001428	4	4	5	4	4	7	5	6	4	1	3	8	5	3	4	3	5	3	2
HOM001429	3	3	3	3	3	7	4	17	2	3	2	3	2	2	2	2	6	3	2
HOM001430	5	3	3	5	5	6	7	4	7	4	2	7	3	3	3	3	3	4	5
HOM001432	6	5	3	1	3	6	5	9	4	3	2	5	3	2	3	2	4	2	1
HOM001433	5	4	3	4	3	5	2	9	3	3	4	4	3	4	4	4	3	3	2
HOM001434	5	5	6	3	3	8	4	5	3	8	4	3	3	4	3	3	4	2	2
HOM001435	3	3	3	3	3	10	7	9	3	3	3	7	3	3	3	4	5	8	22
HOM001437	2	2	3	1	3	5	1	9	6	9	5	4	3	3	5	3	3	2	2
HOM001438	2	2	4	2	2	6	5	4	4	2	5	3	3	4	4	3	6	2	1
HOM001439	3	2	5	4	1	8	3	2	1	10	8	4	1	8	1	1	9	2	2
HOM001440	1	1	1	3	2	2	4	7	1	6	3	2	1	1	1	1	36	1	3
HOM001441	3	3	9	2	2	5	19	5	3	4	3	4	2	2	3	3	3	4	7
HOM001442	3	3	4	2	6	5	2	6	5	1	5	4	3	4	3	3	5	1	1
HOM001443	3	3	3	3	3	10	3	7	7	2	3	6	4	2	3	3	5	4	3
HOM001444	3	3	3	3	3	8	1	5	4	1	3	3	3	3	3	3	5	2	2
HOM001445	3	3	4	3	4	9	5	6	5	2	7	6	3	5	3	3	3	5	7
HOM001446	3	2	6	2	3	8	1	9	5	4	6	3	3	6	3	4	7	2	1
HOM001447	3	3	3	1	3	5	4	6	4	1	3	4	3	3	4	3	2	3	3
HOM001448	2	3	4	4	4	5	3	6	3	3	3	4	3	3	3	4	3	2	2
HOM001449	3	3	2	3	2	5	2	9	5	2	4	3	4	1	4	3	2	3	2
HOM001450	4	5	3	3	5	5	0	14	4	3	3	7	2	8	3	3	3	2	3
HOM001451	3	3	2	3	2	6	2	9	3	2	2	4	2	2	2	3	2	3	3
HOM001452	6	6	2	2	3	6	5	9	3	7	3	6	3	3	3	2	6	4	3
HOM001453	2	2	2	2	2	3	7	23	4	2	2	4	2	2	2	2	4	2	2
HOM001454	2	2	3	2	2	4	3	26	3	1	3	2	2	3	2	2	5	2	2
HOM001455	3	2	4	2	5	6	3	10	5	1	5	3	2	3	3	2	4	2	2
HOM001456	4	4	3	2	2	6	3	11	4	2	3	2	2	2	2	3	6	4	3
HOM001457	6	6	4	2	2	9	6	6	6	1	4	4	2	9	2	2	5	6	4
HOM001458	7	4	3	4	3	9	4	0	6	7	3	8	3	4	3	3	3	3	2
HOM001459	2	2	2	4	2	8	3	8	3	3	2	5	3	2	3	5	3	2	2
HOM001460	6	2	2	4	5	7	4	6	4	4	2	8	3	1	4	5	5	3	3
HOM001461	2	3	3	4	3	5	2	5	3	3	2	4	3	2	4	3	7	4	4
HOM001462	2	2	3	3	1	7	3	4	4	1	4	5	2	3	2	2	5	2	3
HOM001463	2	2	6	2	1	5	3	4	4	2	15	2	2	4	3	3	2	1	1
HOM001464	3	3	3	3	3	6	6	8	4	1	2	8	3	4	3	3	4	3	3
HOM001468	4	4	2	4	3	4	6	6	4	4	2	4	3	4	4	3	3	3	3
HOM001469	4	4	3	4	2	9	3	2	9	5	3	7	2	3	2	7	3	1	1
HOM001470	5	5	2	2	3	8	3	5	4	4	1	5	5	3	3	5	5	1	1
HOM001471	5	4	6	2	4	6	1	19	4	2	3	4	2	3	2	2	3	4	4
HOM001473	3	3	5	2	2	4	1	8	6	8	5	4	3	3	2	3	4	3	2
HOM001475	3	2	4	1	3	6	3	9	4	2	6	5	3	4	3	3	4	2	2
HOM001476	8	4	2	3	6	9	5	12	5	1	2	5	2	1	3	3	2	2	2
HOM001477	4	4	3	3	4	9	5	5	4	2	3	5	3	2	5	3	5	2	1
HOM001478	2	2	2	2	2	5	2	6	3	4	2	4	1	1	2	3	3	3	4
HOM001479	3	4	3	3	4	9	2	4	3	4	3	4	3	4	3	3	8	3	3
HOM001480	1	3	2	5	1	7	4	9	5	6	3	3	4	2	2	4	4	2	2
HOM001481	5	5	3	4	3	4	2	11	4	4	5	6	3	3	3	3	3	3	3
HOM001482	2	2	1	2	6	6	5	19	3	2	2	3	4	0	3	2	2	1	2
HOM001483	3	3	3	3	2	4	1	5	3	2	2	3	3	3	2	3	8	2	2
HOM001484	7	5	2	3	3	8	4	7	6	3	2	6	3	1	3	3	1	3	3
HOM001485	3	3	2	3	5	4	5	6	3	5	2	3	2	3	7	2	2	4	28
HOM001486	2	3	2	2	4	4	2	14	3	3	4	4	1	3	2	2	5	4	6
HOM001487	5	4	5	4	4	10	3	6	4	2	3	5	4	6	4	3	4	4	3
HOM001488	3	3	6	2	3	16	2	4	4	4	4	5	2	5	3	1	7	6	6
HOM001489	3	3	2	3	3	8	6	8	4	3	5	4	3	1	3	3	3	5	3
HOM001490	5	4	3	2	3	7	2	7	3	3	3	6	5	3	4	4	4	4	4
HOM001492	6	5	3	3	3	9	4	10	7	1	2	9	4	2	4	3	2	3	9
HOM001493	2	2	3	2	3	8	4	3	4	3	3	4	2	4	4	3	6	4	3
HOM001494	3	3	2	3	7	5	3	6	4	1	2	8	4	3	5	2	3	4	3
HOM001495	4	5	4	3	3	7	2	11	5	1	5	5	5	3	5	5	3	1	1
HOM001497	32	2	2	3	2	1	3	7	4	1	1	6	1	1	2	1	1	1	1
HOM001498	2	2	5	3	2	10	5	5	3	3	6	3	1	5	2	2	7	4	4
HOM001499	3	3	3	3	4	5	2	8	4	4	3	7	2	3	3	3	4	2	2
HOM001500	3	3	4	2	2	8	1	10	4	4	4	5	4	5	2	2	5	2	3
HOM001501	1	1	9	1	1	2	1	5	3	1	10	2	1	15	1	2	5	1	1
HOM001502	3	3	2	1	3	5	3	15	5	3	4	6	3	2	3	3	2	1	1
HOM001503	4	4	4	3	4	6	3	8	4	2	2	5	5	3	0	2	2	6	3
HOM001505	5	5	3	2	6	6	2	6	3	3	3	4	2	3	4	3	6	4	5
HOM001506	2	2	5	2	4	5	3	6	3	0	3	4	2	5	3	2	5	4	6
HOM001507	4	3	2	3	2	8	8	8	2	6	2	4	4	2	2	3	4	6	6
HOM001508	3	4	4	1	3	10	2	6	2	3	4	3	3	3	2	4	4	3	3
HOM001509	1	2	1	2	5	10	3	7	1	26	1	1	6	2	1	1	2	1	2
HOM001510	3	3	3	4	1	3	3	8	5	2	7	5	2	3	2	2	2	1	1
HOM001511	4	4	3	4	3	6	3	4	5	3	3	5	3	3	4	2	4	2	1
HOM001512	4	4	2	3	4	2	2	15	4	2	7	3	4	1	2	3	2	2	2
HOM001514	2	2	3	4	2	2	1	14	2	15	2	2	1	6	1	2	5	3	4
HOM001515	4	5	6	3	2	5	3	4	7	2	3	5	7	2	4	1	10	1	1
HOM001517	4	3	5	3	4	8	4	7	3	7	1	6	4	4	2	3	4	3	2
HOM001518	4	4	3	2	3	5	5	5	3	0	4	3	2	2	2	2	7	1	1
HOM001519	2	2	2	2	3	7	4	10	5	2	3	4	2	3	2	2	9	5	5
HOM001520	5	2	2	2	3	6	5	5	3	2	3	4	2	3	2	7	3	4	7
HOM001521	6	6	3	2	6	8	1	3	4	2	3	4	5	2	4	3	5	4	2
HOM001522	3	3	2	2	3	5	3	6	3	2	2	7	2	2	2	3	4	1	1
HOM001523	3	4	3	2	3	5	2	11	3	4	3	4	2	3	3	6	4	2	2
HOM001524	3	3	2	2	2	6	4	11	6	8	4	5	2	0	2	3	2	3	3
HOM001525	2	2	3	2	1	4	2	22	2	1	3	4	2	3	2	2	5	2	2
HOM001526	3	3	2	2	4	6	2	11	4	6	2	4	2	2	2	5	3	3	7
HOM001527	5	4	2	3	3	5	3	7	3	2	4	4	3	3	3	3	5	2	2
HOM001528	5	4	3	3	2	6	3	6	4	2	3	3	2	6	5	5	10	2	3
HOM001529	6	5	2	2	2	7	4	22	3	0	2	4	2	6	2	2	4	2	1
HOM001530	4	3	3	3	6	4	1	12	5	2	4	4	3	3	3	2	7	3	2
HOM001532	3	3	3	3	2	9	3	5	5	3	3	6	2	3	3	4	3	4	4
HOM001533	3	3	5	4	3	7	3	6	2	2	5	5	2	5	3	3	5	4	10
HOM001535	4	5	0	5	6	2	2	13	7	4	0	9	5	0	3	1	0	2	10
HOM001536	8	6	4	3	2	8	3	6	5	4	3	4	4	3	3	2	4	2	2
HOM001537	2	2	4	0	6	5	2	15	4	1	6	5	3	4	4	1	3	1	1
HOM001538	3	3	2	2	5	4	1	13	4	2	2	3	2	2	2	2	3	2	2
HOM001539	3	3	2	4	2	6	3	7	3	5	2	3	2	3	3	3	4	4	5
HOM001540	3	3	3	2	5	7	2	13	5	4	3	6	2	3	4	3	3	2	1
HOM001541	3	3	3	2	4	4	4	4	2	1	3	4	4	3	4	2	5	5	5
HOM001542	1	1	2	1	1	4	2	23	3	1	3	5	2	2	3	5	3	2	2
HOM001543	3	3	2	2	2	6	2	8	5	1	2	5	3	1	4	5	4	2	2
HOM001544	4	4	2	2	2	8	4	6	3	3	2	3	3	3	3	2	4	2	1
HOM001545	3	2	3	3	2	7	4	5	5	1	4	4	5	3	3	5	4	3	2
HOM001546	3	3	3	3	2	4	1	8	5	6	4	4	2	1	3	3	6	4	2
HOM001547	3	3	2	3	4	8	5	11	3	3	2	6	4	3	3	2	4	2	2
HOM001548	3	3	4	3	2	7	8	6	5	1	4	4	3	4	2	2	4	2	2
HOM001549	1	4	5	5	3	5	4	12	5	2	4	5	3	4	3	3	3	2	2
HOM001551	4	4	3	4	2	5	3	8	3	5	3	6	3	1	3	3	3	2	2
HOM001553	4	4	5	3	4	6	4	4	4	3	4	4	4	4	3	3	5	5	3
HOM001555	3	3	3	3	2	5	1	7	3	1	4	3	4	4	5	2	4	2	2
HOM001556	2	4	4	7	2	8	6	8	4	3	2	4	2	3	3	3	3	3	3
HOM001557	4	3	3	3	4	6	2	5	3	2	4	8	5	3	2	3	7	3	3
HOM001558	3	3	2	7	4	6	4	8	2	5	2	3	4	3	2	2	3	2	2
HOM001559	3	3	2	3	2	7	4	7	7	5	2	6	3	3	3	3	3	4	3
HOM001560	1	1	1	1	3	8	8	20	2	11	1	2	5	1	3	2	1	2	2
HOM001561	1	2	1	1	51	4	2	2	2	2	1	2	1	1	1	0	1	2	1
HOM001562	5	5	3	3	2	10	2	2	6	2	4	7	3	3	4	3	4	5	4
HOM001563	3	3	2	2	2	5	4	9	4	2	2	4	2	2	2	3	3	2	2
HOM001564	3	2	3	3	3	8	3	8	5	3	3	4	3	3	3	2	7	2	2
HOM001566	3	3	4	2	2	7	3	14	3	2	4	3	3	2	2	2	3	3	2
HOM001567	4	4	1	2	3	8	4	21	6	2	1	4	2	1	2	2	3	1	1
HOM001568	4	3	2	2	4	7	4	11	3	3	2	5	3	3	4	3	2	3	3
HOM001569	3	3	2	2	2	6	5	6	6	4	3	10	4	2	3	3	5	6	14
HOM001570	3	4	3	2	3	6	3	6	3	3	4	4	2	3	2	2	4	2	3
HOM001571	2	3	2	2	3	5	4	10	6	3	4	7	3	3	3	3	4	3	2
HOM001572	2	2	4	2	3	4	3	6	4	4	4	5	2	5	3	3	5	5	7
HOM001573	3	3	3	4	6	6	3	5	4	2	3	5	3	3	3	3	5	3	2
HOM001574	3	4	2	4	2	3	2	9	3	1	4	4	2	3	2	4	3	2	2
HOM001575	7	5	1	1	6	6	5	6	4	0	8	9	3	1	3	1	1	2	2
HOM001576	3	1	2	2	12	7	1	7	2	2	5	2	6	7	4	3	3	2	2
HOM001577	3	3	3	3	3	3	1	7	3	2	3	4	4	2	3	3	3	3	2
HOM001579	3	3	3	2	2	4	6	19	3	4	2	3	2	2	3	2	3	3	3
HOM001580	4	3	4	2	2	5	3	6	3	2	4	3	2	4	2	2	9	4	4
HOM001581	3	1	2	2	3	6	2	15	6	1	2	5	5	2	4	4	3	1	1
HOM001582	2	2	7	3	3	5	5	7	4	4	3	2	3	4	6	2	2	2	2
HOM001583	3	3	5	2	2	7	2	4	3	2	6	3	8	3	2	2	7	3	3
HOM001584	3	2	2	3	2	6	7	6	3	4	3	4	2	3	2	3	4	2	2
HOM001585	3	2	4	1	2	10	4	0	2	8	2	5	1	4	2	2	10	1	1
HOM001586	2	2	3	3	2	4	1	6	2	2	3	3	6	3	6	2	3	3	3
HOM001587	8	6	3	2	3	8	4	7	4	2	2	5	2	2	3	3	2	3	2
HOM001588	3	2	2	4	2	6	2	7	4	3	2	5	3	2	3	3	3	3	2
HOM001589	6	2	3	2	1	4	4	9	2	2	3	3	2	3	2	3	5	2	2
HOM001590	3	3	3	2	3	6	1	5	5	3	3	6	2	3	3	2	6	3	4
HOM001591	3	3	3	2	2	5	2	15	4	1	3	3	2	3	2	2	4	2	2
HOM001592	3	3	3	3	2	8	2	5	6	2	6	3	4	4	3	2	4	2	2
HOM001593	3	2	2	2	15	3	4	9	2	8	2	2	2	2	2	3	2	2	2
HOM001594	3	3	3	3	3	4	3	9	5	1	4	5	3	4	4	3	4	3	2
HOM001595	3	3	3	2	1	4	1	5	4	5	3	4	3	3	3	3	5	3	2
HOM001597	4	4	2	2	2	4	1	11	1	0	1	2	2	1	2	2	1	3	3
HOM001598	2	2	7	3	3	7	4	10	3	3	3	3	2	3	2	2	3	3	2
HOM001600	2	2	4	2	2	5	0	6	3	1	9	2	2	3	2	2	3	2	5
HOM001601	7	10	5	1	2	4	5	6	3	4	5	6	4	2	3	2	1	1	1
HOM001604	4	4	5	6	2	3	2	6	5	2	4	5	3	4	3	4	4	6	9
HOM001605	3	3	2	2	2	7	2	5	4	4	2	5	3	5	3	4	4	2	1
HOM001606	7	5	2	3	2	7	5	7	3	2	2	6	2	2	4	2	5	3	2
HOM001607	3	2	4	2	2	4	2	9	6	2	3	4	1	5	3	1	6	5	7
HOM001608	3	3	3	3	4	8	3	4	4	3	3	4	2	3	2	2	4	4	4
HOM001609	7	4	3	5	4	6	2	7	4	3	3	7	4	3	3	3	2	7	6
HOM001610	3	3	3	2	2	6	2	5	2	4	4	4	3	4	3	2	7	8	12
HOM001611	3	3	2	1	1	2	2	15	3	0	4	2	1	4	2	2	9	6	7
HOM001612	3	3	2	3	2	7	2	9	5	3	2	4	2	2	3	3	4	2	1
HOM001613	5	5	3	2	2	8	3	2	4	4	3	4	2	3	2	2	3	2	2
HOM001614	2	2	2	6	2	2	5	5	2	1	2	4	3	3	4	2	5	2	12
HOM001615	4	3	3	2	3	6	3	3	2	4	3	4	3	1	2	2	2	3	3
HOM001616	3	3	2	2	2	4	1	8	2	4	2	2	2	2	2	2	3	2	1
HOM001617	2	2	2	4	3	6	3	8	3	4	2	6	3	2	3	2	1	3	3
HOM001618	1	1	2	2	5	8	7	8	4	3	2	6	2	1	2	2	7	4	5
HOM001619	8	6	4	3	1	8	2	6	4	3	3	5	1	5	3	1	3	4	4
HOM001620	2	2	2	1	2	12	2	10	5	1	2	10	3	2	2	5	3	2	2
HOM001621	2	2	5	2	4	7	1	6	5	2	3	5	3	2	3	3	5	2	1
HOM001622	3	3	3	4	3	6	3	10	4	0	2	3	3	4	3	3	2	3	1
HOM001624	1	1	2	4	1	5	6	13	3	5	3	4	1	3	1	1	6	1	1
HOM001626	3	4	3	3	2	9	4	7	4	2	3	7	3	3	3	3	3	6	5
HOM001627	2	2	2	2	4	5	6	6	2	4	4	3	2	2	2	2	2	2	2
HOM001628	2	2	3	2	4	6	3	7	3	4	2	5	5	3	2	2	3	3	6
HOM001629	3	3	3	4	4	9	4	7	3	4	3	2	2	2	2	5	2	4	2
HOM001630	1	1	4	1	3	6	4	2	3	2	4	3	3	3	3	3	11	2	2
HOM001631	5	3	1	21	2	2	1	3	4	0	2	5	4	1	2	2	2	2	2
HOM001632	3	3	3	3	5	5	4	8	4	1	3	4	3	3	3	3	2	3	3
HOM001633	2	3	2	1	4	4	4	4	5	0	3	6	2	5	5	2	3	1	1
HOM001634	24	8	2	2	2	4	2	7	1	1	1	2	1	2	1	3	2	1	1
HOM001635	3	3	2	2	4	8	2	6	2	4	4	4	4	3	4	2	3	4	3
HOM001636	3	3	3	4	4	5	5	3	3	5	4	3	3	5	2	2	4	2	2
HOM001638	4	4	3	3	3	9	2	5	6	0	2	5	3	4	6	4	4	3	3
HOM001639	3	3	2	4	5	6	2	7	4	4	2	2	3	4	2	15	2	1	2
HOM001640	2	2	3	2	2	11	3	7	4	4	3	3	2	3	2	2	8	5	9
HOM001641	4	3	2	3	3	10	3	5	5	2	2	6	4	2	3	3	4	4	6
HOM001643	2	2	2	2	4	4	2	13	4	4	2	4	2	3	4	2	4	2	2
HOM001644	2	2	2	2	2	4	3	11	3	5	2	3	3	2	2	2	3	2	2
HOM001645	3	4	3	2	1	7	2	4	3	6	6	3	3	3	2	1	3	3	2
HOM001646	3	6	2	3	1	5	5	7	2	1	4	4	2	6	2	1	3	4	4
HOM001647	3	4	3	3	3	5	2	5	4	2	3	3	3	3	3	3	3	3	2
HOM001648	2	2	4	3	3	9	2	4	4	4	5	4	2	4	3	3	3	5	3
HOM001649	3	4	3	2	3	7	3	7	5	3	2	6	4	5	3	2	7	2	1
HOM001650	3	2	2	1	3	7	7	4	2	3	2	2	3	2	2	2	5	3	1
HOM001651	3	3	6	2	2	8	2	6	4	2	5	4	1	6	2	2	8	3	2
HOM001652	3	3	2	3	3	8	4	7	5	4	2	4	3	2	3	6	3	5	4
HOM001653	2	2	4	3	4	7	4	6	2	3	6	4	3	3	3	3	5	2	3
HOM001654	2	2	3	3	3	10	0	7	4	8	3	5	3	4	3	1	4	3	8
HOM001655	2	3	3	3	1	4	2	5	6	0	3	4	2	2	3	6	3	4	3
HOM001656	3	2	2	2	4	3	2	4	4	2	4	7	2	2	2	3	2	3	3
HOM001657	3	3	3	2	3	4	5	10	3	5	3	4	2	3	2	2	3	4	2
HOM001658	3	3	3	2	2	8	6	3	4	4	3	4	2	3	2	2	7	3	3
HOM001660	6	6	4	3	1	2	1	6	6	0	2	4	1	4	3	2	4	2	2
HOM001661	2	3	2	2	2	8	4	7	4	7	2	6	2	2	3	7	3	2	2
HOM001662	1	1	3	3	3	6	5	3	2	4	4	3	5	3	2	2	4	3	1
HOM001663	4	4	2	3	3	7	4	7	5	1	3	6	3	3	3	2	4	1	1
HOM001664	4	4	4	2	2	9	1	4	4	5	5	2	2	5	2	3	8	5	4
HOM001666	2	3	2	2	3	7	4	4	4	4	3	4	2	2	3	5	2	4	4
HOM001667	2	2	3	3	2	4	2	8	2	3	2	5	2	3	2	7	5	3	3
HOM001668	3	3	3	4	0	3	3	1	3	2	3	8	3	4	3	2	5	2	1
HOM001669	3	3	2	4	1	4	4	10	4	3	3	3	2	3	4	2	3	2	1
HOM001670	3	3	2	2	3	5	4	12	2	2	3	3	3	2	2	3	2	2	2
HOM001671	4	4	2	1	4	8	4	7	6	3	2	5	4	3	3	3	3	3	2
HOM001674	2	2	3	2	2	4	6	6	4	4	2	2	3	2	2	3	4	2	2
HOM001675	3	3	3	2	3	3	1	7	2	4	2	7	3	1	3	2	5	5	5
HOM001677	4	3	3	1	3	5	3	12	3	1	3	5	2	3	3	2	1	2	1
HOM001678	2	2	2	3	3	11	5	9	5	1	2	7	2	2	3	3	3	3	12
HOM001679	4	3	3	5	3	4	5	6	3	3	2	2	3	3	3	5	3	2	2
HOM001680	4	2	4	2	2	5	4	5	6	2	4	4	3	4	3	5	4	3	2
HOM001681	3	2	3	2	3	3	5	3	2	12	2	3	2	2	1	2	4	1	1
HOM001683	2	2	9	1	1	2	1	2	2	0	14	2	1	6	1	3	6	4	5
HOM001684	5	4	2	2	4	7	2	8	3	3	2	4	1	2	4	4	2	2	1
HOM001685	4	4	2	5	3	5	4	7	3	2	3	3	2	2	2	3	2	3	2
HOM001686	3	4	2	3	3	8	1	9	6	3	3	7	3	2	2	4	5	2	2
HOM001687	4	4	4	2	2	6	1	4	3	4	4	4	2	5	2	2	7	3	2
HOM001688	4	4	0	3	4	10	4	13	6	4	0	6	3	0	3	3	1	7	5
HOM001690	2	2	2	1	2	4	2	5	2	2	8	4	3	6	2	3	4	3	3
HOM001691	3	4	2	2	4	6	1	9	3	2	3	3	3	2	3	11	2	4	5
HOM001692	1	1	3	1	2	7	7	6	3	12	4	2	1	4	1	1	3	6	2
HOM001693	1	1	2	0	1	2	1	3	2	1	1	2	1	2	1	1	1	1	1
HOM001694	3	3	3	2	2	4	2	5	4	3	4	4	3	5	3	5	9	3	9
HOM001695	4	4	5	3	3	5	2	4	4	3	4	4	3	5	3	3	3	1	1
HOM001696	3	3	3	3	1	8	2	2	2	2	3	2	2	10	3	2	4	3	2
HOM001697	3	4	2	2	1	4	4	10	2	5	2	4	2	2	2	2	2	2	2
HOM001698	3	3	4	3	2	6	2	7	6	6	3	4	2	3	1	2	4	2	2
HOM001700	3	2	1	2	2	8	9	9	3	5	1	4	2	2	2	5	2	2	1
HOM001701	5	5	3	2	2	4	4	5	3	4	3	2	2	5	2	2	7	2	2
HOM001702	1	1	2	2	3	7	2	6	4	2	5	5	3	4	4	2	5	3	3
HOM001703	4	3	2	2	2	6	9	8	3	3	3	4	2	3	2	3	3	3	18
HOM001705	3	2	5	1	2	4	2	3	3	6	4	3	2	4	2	3	5	2	2
HOM001706	6	5	4	1	2	4	4	5	1	4	0	4	2	4	2	3	4	1	1
HOM001708	6	2	2	2	2	7	4	8	3	3	3	4	2	2	2	4	2	2	2
HOM001709	3	3	2	2	2	7	1	8	4	4	2	3	2	3	2	2	3	3	3
HOM001710	2	4	3	4	3	8	3	4	6	5	2	6	3	4	4	1	4	5	4
HOM001711	3	2	2	3	2	7	4	10	2	1	2	3	2	3	2	4	3	3	3
HOM001712	3	3	3	4	3	6	3	8	6	2	3	6	3	3	3	3	3	4	3
HOM001713	2	2	2	3	2	7	2	8	2	3	2	2	2	3	2	4	6	2	2
HOM001714	6	4	2	2	2	7	4	8	3	1	2	4	2	3	2	4	7	3	1
HOM001715	6	4	4	4	5	4	2	5	5	1	3	4	2	3	2	3	4	2	2
HOM001716	5	5	3	2	2	6	2	2	4	3	2	3	3	2	4	4	1	3	3
HOM001717	3	3	2	2	5	6	3	7	5	2	2	6	3	1	4	2	5	2	1
HOM001718	3	3	3	3	2	4	1	18	5	2	3	4	3	3	2	2	2	3	2
HOM001721	3	2	2	4	4	4	6	6	3	5	2	3	4	2	3	3	2	2	1
HOM001722	4	3	2	3	3	4	4	7	4	3	3	4	2	3	4	2	3	6	12
HOM001723	5	3	3	2	4	6	0	8	3	2	3	4	2	3	2	3	4	2	1
HOM001725	2	2	3	1	5	2	1	2	3	1	11	6	2	4	2	1	5	1	1
HOM001726	8	3	2	2	2	4	5	10	4	2	1	5	2	2	1	1	4	2	1
HOM001728	3	5	4	2	2	5	6	2	4	1	4	4	2	5	3	2	8	3	3
HOM001730	1	1	3	1	13	3	2	5	3	3	4	3	7	2	2	1	4	1	1
HOM001731	4	3	2	2	2	4	4	6	4	2	2	6	5	2	2	5	1	3	3
HOM001732	4	4	3	3	3	8	2	6	4	6	3	5	3	3	3	3	2	5	4
HOM001734	2	2	2	1	2	6	5	8	3	6	3	3	2	2	2	2	9	4	7
HOM001735	6	4	4	2	3	6	1	11	3	1	2	4	2	0	2	2	5	4	9
HOM001736	4	3	4	2	2	4	3	4	3	1	4	2	3	4	5	5	6	2	2
HOM001737	4	4	2	3	2	4	2	4	3	2	3	4	2	3	2	6	8	5	3
HOM001738	3	3	4	2	2	6	2	13	4	4	3	3	2	3	2	3	5	1	1
HOM001739	1	1	2	4	5	4	4	11	3	5	2	4	3	1	3	6	1	1	1
HOM001740	5	2	3	3	4	6	5	8	4	1	2	5	2	1	2	2	2	2	2
HOM001742	3	3	2	2	3	4	2	8	2	4	2	3	2	3	2	2	5	2	3
HOM001743	2	2	3	2	3	7	3	9	3	2	2	3	2	2	2	2	2	3	7
HOM001744	3	3	2	2	5	5	1	7	5	2	2	4	2	3	2	3	6	4	10
HOM001745	4	3	5	3	2	6	1	5	3	0	4	5	3	5	3	2	4	3	3
HOM001746	2	2	5	2	2	7	2	8	4	2	3	5	2	2	2	3	7	6	4
HOM001747	7	5	2	1	4	2	1	9	1	5	4	4	2	3	2	2	1	1	1
HOM001748	2	2	1	1	5	4	2	16	2	2	1	3	3	1	2	5	2	1	1
HOM001749	5	4	1	1	4	7	6	11	3	1	2	1	2	2	1	1	3	1	1
HOM001750	4	2	2	2	1	5	3	8	2	3	2	3	4	4	2	3	2	3	6
HOM001751	5	3	2	2	2	8	1	4	4	3	2	7	3	2	3	2	2	2	2
HOM001752	3	2	0	1	43	3	0	2	2	1	0	2	1	0	1	1	0	1	1
HOM001753	2	2	2	3	2	7	4	5	4	2	2	5	5	1	3	3	4	3	2
HOM001754	0	2	3	2	4	3	7	1	2	3	5	3	2	5	2	2	8	2	2
HOM001755	3	2	3	2	1	5	1	4	2	6	5	4	2	3	3	2	5	2	2
HOM001756	2	2	2	3	3	4	1	15	3	1	2	4	2	2	2	2	2	2	2
HOM001757	4	3	3	4	4	5	2	4	4	3	3	8	2	3	3	3	2	1	1
HOM001758	2	2	4	3	2	7	2	7	2	3	5	5	2	5	2	2	6	1	1
HOM001759	4	2	2	5	3	4	4	8	4	2	2	5	3	2	3	4	2	3	3
HOM001760	7	3	2	2	2	4	3	8	2	1	2	4	3	2	3	4	2	1	1
HOM001761	3	4	1	3	3	5	11	7	4	3	2	4	3	1	4	3	1	3	2
HOM001762	2	2	4	2	1	2	1	4	4	7	5	3	3	3	2	1	4	1	1
HOM001763	3	3	3	3	4	4	1	7	5	0	3	4	3	3	3	2	5	2	1
HOM001764	3	4	2	4	2	5	5	9	4	1	2	2	2	2	3	2	2	3	2
HOM001765	7	5	2	3	3	6	0	9	3	2	2	7	5	2	2	3	2	3	1
HOM001767	3	3	3	2	2	5	2	4	3	1	3	3	2	3	2	2	9	2	4
HOM001768	3	3	1	3	2	5	5	13	3	2	2	5	3	1	3	6	1	2	1
HOM001769	3	3	2	3	1	4	4	3	4	2	2	8	4	2	2	3	3	2	1
HOM001770	5	3	2	2	2	4	8	8	3	6	1	3	2	1	2	3	3	2	1
HOM001773	4	3	3	2	3	6	2	6	2	3	5	3	2	3	3	2	3	3	4
HOM001774	2	2	4	2	3	5	4	5	4	3	4	4	3	5	2	3	5	3	1
HOM001776	4	4	2	0	2	6	1	7	4	6	3	4	2	2	3	2	4	3	2
HOM001777	2	2	3	2	3	3	4	5	5	5	3	4	2	1	1	1	3	1	1
HOM001778	3	3	3	3	6	7	3	6	5	2	2	5	3	2	3	2	3	1	1
HOM001780	1	1	2	3	1	4	5	3	2	2	2	1	1	1	1	1	1	1	1
HOM001781	7	7	2	3	5	6	1	8	5	1	2	4	3	2	3	3	2	4	3
HOM001782	4	4	1	2	9	2	3	11	2	5	3	2	2	2	2	1	2	1	1
HOM001783	2	2	2	3	3	6	3	6	6	1	2	5	3	3	3	4	6	2	5
HOM001784	3	3	4	1	9	4	2	6	3	0	5	4	1	6	2	1	4	2	6
HOM001785	21	6	1	2	2	5	3	6	3	0	1	5	1	2	3	2	2	2	2
HOM001787	7	4	2	4	2	4	1	13	4	3	2	4	2	2	2	2	5	2	2
HOM001788	2	3	3	6	3	6	3	5	4	2	3	5	2	3	3	3	4	4	4
HOM001789	2	2	1	10	2	4	3	9	2	5	1	4	2	1	4	3	1	3	5
HOM001790	2	3	3	3	3	5	2	5	4	4	3	5	2	2	3	3	4	4	4
HOM001791	7	4	2	2	1	4	2	13	4	2	4	2	4	3	4	2	4	2	2
HOM001792	3	2	0	2	4	5	2	9	6	4	0	9	3	6	2	4	3	4	2
HOM001793	1	1	3	1	6	4	1	6	2	0	6	3	3	3	2	3	4	2	2
HOM001794	2	2	2	2	2	4	4	6	4	14	2	5	2	5	2	2	2	2	1
HOM001795	5	2	2	3	2	5	3	7	1	3	2	4	2	2	2	3	2	2	2
HOM001796	4	3	5	3	2	2	7	11	3	4	2	2	2	2	1	1	3	1	1
HOM001797	2	2	3	2	3	4	3	4	4	3	2	4	3	3	3	2	2	3	8
HOM001798	2	2	4	2	8	6	5	5	2	1	3	2	3	4	4	1	2	2	1
HOM001799	4	4	3	2	2	3	1	6	3	3	3	5	3	4	3	2	5	2	2
HOM001800	3	3	3	3	2	3	1	18	2	1	3	3	2	2	2	1	5	2	2
HOM001801	3	3	2	3	2	6	2	2	4	2	4	5	2	2	3	3	4	8	6
HOM001802	4	4	3	2	2	8	2	3	4	4	3	4	2	3	3	5	5	4	3
HOM001803	3	6	3	2	2	4	1	6	3	1	3	3	2	3	2	2	3	1	1
HOM001804	13	14	3	1	1	4	2	2	1	12	2	2	1	2	1	1	2	1	1
HOM001805	2	3	2	3	2	5	6	8	2	2	2	7	2	2	2	2	3	1	1
HOM001806	2	2	2	3	5	3	4	2	3	1	3	4	2	2	4	2	3	2	2
HOM001807	2	2	2	3	2	4	7	5	3	2	2	2	3	2	2	2	3	2	2
HOM001808	5	4	2	2	4	10	0	5	5	2	2	5	3	0	3	3	3	3	4
HOM001810	2	2	2	3	3	5	3	14	3	2	2	5	2	3	3	2	4	4	4
HOM001811	5	5	2	3	3	8	4	6	3	2	3	4	3	2	3	3	2	1	2
HOM001812	3	3	2	2	2	9	8	4	2	7	2	4	2	3	2	2	3	2	1
HOM001813	3	4	2	2	2	4	2	3	3	2	2	2	3	1	2	2	3	2	2
HOM001814	3	3	3	1	3	6	4	7	5	4	3	5	3	1	2	4	4	4	13
HOM001815	4	4	2	2	3	8	4	6	4	1	3	4	4	3	3	3	3	5	5
HOM001817	6	6	1	3	4	8	4	6	5	1	1	9	3	1	3	2	1	4	3
HOM001818	3	3	1	6	5	5	1	8	5	3	3	7	4	1	3	3	1	1	1
HOM001819	6	3	3	2	2	5	2	5	4	4	3	3	2	3	3	3	3	2	1
HOM001820	1	1	3	0	1	2	1	6	1	1	14	2	1	9	1	1	9	1	1
HOM001821	4	4	2	3	5	9	1	4	7	2	2	4	4	2	4	4	4	3	3
HOM001822	3	2	3	2	2	6	3	9	3	4	4	4	2	3	2	1	6	1	1
HOM001823	2	2	2	3	2	10	6	4	4	4	5	4	3	4	3	1	4	2	2
HOM001824	1	1	4	1	1	2	6	3	1	2	2	3	2	2	1	1	2	1	4
HOM001825	2	2	3	3	2	4	4	6	2	0	3	4	2	4	2	2	4	2	2
HOM001826	8	4	2	2	2	7	4	7	5	4	2	4	3	0	2	2	5	3	8
HOM001827	2	2	2	2	2	4	5	7	3	2	3	5	2	2	2	2	5	3	1
HOM001828	5	3	2	2	2	3	4	12	3	4	2	4	2	2	2	2	3	2	2
HOM001829	7	3	2	2	3	4	3	7	3	0	2	2	3	1	2	2	3	2	3
HOM001830	1	1	4	0	3	2	2	4	4	0	3	7	3	4	2	2	12	2	2
HOM001832	4	4	4	2	4	7	1	5	4	1	5	4	2	4	2	1	7	3	1
HOM001833	4	3	2	2	2	3	1	13	3	1	2	4	1	2	3	2	2	2	2
HOM001834	2	1	2	2	3	11	2	13	5	2	1	4	2	7	3	4	2	2	2
HOM001835	2	2	2	3	2	3	2	3	5	5	2	4	2	2	3	3	3	2	2
HOM001837	6	3	4	3	2	5	4	6	3	2	3	3	3	3	2	4	4	2	2
HOM001839	4	4	3	1	3	4	4	6	3	4	3	3	2	2	2	3	3	2	2
HOM001841	3	3	3	2	2	4	3	7	2	1	3	4	2	3	2	2	3	2	2
HOM001842	3	3	1	4	6	5	7	3	2	1	5	5	2	3	1	2	3	1	1
HOM001843	2	2	2	3	4	7	3	7	3	10	2	5	3	2	3	3	3	3	3
HOM001846	3	2	2	2	2	6	3	10	3	5	2	4	2	1	4	2	5	1	1
HOM001847	7	3	2	3	2	2	5	6	2	1	2	1	2	4	3	4	2	2	2
HOM001848	6	4	1	2	5	7	3	10	3	1	1	5	2	0	7	3	1	2	2
HOM001850	4	3	5	3	3	6	5	9	2	0	3	2	2	3	1	2	3	2	2
HOM001851	3	3	2	3	2	6	3	5	3	1	4	4	2	2	2	2	3	2	2
HOM001852	8	6	2	4	3	3	7	2	2	2	2	2	4	2	3	2	3	2	2
HOM001854	1	1	6	1	1	4	1	1	1	2	16	1	1	5	3	0	4	1	1
HOM001855	4	4	3	3	3	3	3	7	3	0	3	4	2	3	2	2	5	3	4
HOM001858	2	1	2	1	2	4	2	3	4	4	4	4	3	1	1	7	2	1	1
HOM001859	1	1	2	4	2	3	5	6	4	1	2	8	2	2	2	3	2	1	1
HOM001860	1	1	3	4	5	0	1	12	3	2	3	5	3	1	4	4	4	1	1
HOM001861	3	3	1	3	3	5	4	10	4	3	1	6	3	1	3	4	1	2	2
HOM001862	4	3	4	2	2	3	1	4	3	2	3	4	2	4	3	2	8	3	3
HOM001863	4	3	1	3	2	8	5	10	3	3	1	5	3	1	3	3	1	4	3
HOM001864	4	2	3	1	4	5	2	4	4	3	4	2	2	3	2	2	3	1	1
HOM001865	6	3	2	2	1	5	4	9	3	4	2	4	3	0	2	1	2	2	3
HOM001866	3	4	3	1	2	9	3	6	4	3	3	4	2	1	2	2	8	2	1
HOM001867	4	3	3	2	4	7	5	6	3	3	2	4	2	0	2	4	3	3	1
HOM001868	4	3	4	2	2	5	6	5	5	3	2	2	3	2	2	3	1	1	2
HOM001869	3	3	2	2	3	5	2	5	4	4	2	4	4	2	3	2	3	4	49
HOM001870	1	1	2	1	1	5	1	4	2	3	2	1	1	3	2	2	4	1	1
HOM001871	2	2	2	2	3	12	1	5	4	2	5	4	2	4	3	4	2	2	1
HOM001872	3	3	2	3	3	8	3	5	4	1	5	6	2	4	2	2	3	1	1
HOM001873	13	7	2	3	2	4	2	4	2	1	2	5	2	2	2	2	2	2	2
HOM001874	3	2	3	2	1	2	2	5	2	6	5	3	1	6	2	3	3	2	1
HOM001877	3	3	4	3	2	4	1	2	4	3	5	4	2	6	1	2	3	2	2
HOM001878	1	1	3	2	2	4	2	11	4	1	2	6	3	4	2	3	3	2	2
HOM001879	4	5	2	2	1	10	2	4	4	3	2	5	2	2	3	3	3	4	6
HOM001880	3	2	2	2	2	3	4	7	4	1	3	5	2	2	2	4	4	2	2
HOM001881	7	2	2	2	2	7	3	5	3	0	3	4	4	2	3	3	3	1	1
HOM001882	3	3	2	3	3	8	4	6	4	1	2	4	3	2	3	2	4	1	1
HOM001883	3	5	0	3	3	5	4	7	5	1	3	5	4	2	4	4	0	4	3
HOM001884	3	3	2	2	1	4	4	8	1	1	2	2	1	4	1	2	7	2	2
HOM001885	2	2	2	2	4	6	5	5	3	5	2	3	2	4	2	4	3	2	2
HOM001886	3	3	3	3	2	4	3	4	3	3	4	5	3	4	3	3	5	3	3
HOM001887	1	1	5	1	0	2	0	2	4	2	4	7	4	5	2	1	6	4	12
HOM001888	3	3	3	2	1	4	3	2	3	2	3	3	2	2	2	5	4	2	2
HOM001889	3	3	3	1	2	4	2	11	3	1	3	3	3	3	2	2	3	2	1
HOM001891	2	2	2	2	1	2	3	8	1	0	2	1	1	2	1	1	25	1	1
HOM001892	3	4	2	3	3	6	5	5	4	2	2	4	2	1	3	2	3	3	2
HOM001893	5	3	2	2	1	3	2	13	3	0	2	2	2	1	2	3	4	2	1
HOM001894	3	4	2	3	4	4	2	10	2	0	2	4	4	2	3	3	4	2	2
HOM001895	2	2	2	3	2	6	1	8	3	1	3	6	2	4	3	3	5	2	1
HOM001896	5	4	3	3	2	6	2	4	3	1	3	4	2	2	2	2	4	3	3
HOM001897	3	4	2	3	2	4	4	9	3	1	2	7	2	2	2	2	2	1	1
HOM001899	3	2	2	2	2	4	2	10	2	1	2	4	3	2	4	2	2	2	2
HOM001901	4	3	3	2	3	6	2	2	6	0	4	5	5	3	3	2	4	1	1
HOM001902	3	3	3	2	4	7	1	5	4	5	4	3	1	0	3	2	3	3	2
HOM001903	4	3	3	2	2	2	1	16	2	1	3	4	1	2	2	1	6	2	2
HOM001905	2	2	1	2	2	4	2	3	8	0	3	6	2	1	6	3	2	2	1
HOM001908	11	5	2	4	3	4	4	5	2	2	2	1	4	2	2	2	2	2	2
HOM001909	1	1	5	2	2	4	2	8	3	2	4	6	5	1	1	2	3	2	2
HOM001910	4	4	2	6	2	3	2	1	3	3	2	4	2	3	2	3	2	3	2
HOM001911	2	2	3	2	2	6	2	3	4	3	3	4	2	3	2	2	6	4	4
HOM001913	3	3	4	2	3	7	2	1	4	2	4	6	2	3	6	3	4	5	3
HOM001914	4	2	3	2	2	3	2	8	3	4	2	3	2	3	3	2	3	2	1
HOM001915	2	2	2	2	2	3	3	10	4	0	2	3	2	2	2	3	3	2	2
HOM001916	3	3	3	1	2	8	1	4	7	4	3	6	2	5	3	1	6	3	2
HOM001918	1	2	3	5	2	4	2	9	2	3	2	4	2	1	3	3	4	2	20
HOM001919	2	2	2	3	2	3	1	6	4	2	3	2	3	4	2	2	3	3	4
HOM001920	1	1	1	3	2	2	2	23	2	2	1	3	3	2	2	3	1	1	1
HOM001921	2	2	2	4	2	5	2	10	3	1	2	3	2	2	4	2	2	2	2
HOM001922	2	2	3	2	2	10	2	4	4	3	3	3	2	3	2	2	12	6	4
HOM001923	2	2	3	3	2	3	3	9	6	0	4	3	2	4	2	2	10	1	1
HOM001924	5	3	2	2	1	2	2	9	2	4	2	2	1	2	1	1	4	2	2
HOM001925	2	5	3	4	3	5	3	6	3	3	3	5	3	3	3	2	4	4	4
HOM001926	4	4	2	2	3	5	1	1	4	1	4	3	3	1	1	3	4	3	4
HOM001927	3	2	2	3	3	8	2	3	4	4	2	4	3	2	4	3	4	2	1
HOM001928	2	2	2	2	3	3	1	7	3	3	3	3	2	3	2	2	3	2	2
HOM001930	3	3	2	2	5	5	2	3	4	2	2	3	2	2	2	2	3	3	2
HOM001931	6	4	2	2	2	4	3	10	3	1	3	3	3	4	2	3	5	1	1
HOM001932	2	2	2	2	2	4	0	18	4	1	2	2	2	2	2	3	1	2	2
HOM001933	2	2	2	5	3	4	3	11	2	1	3	4	2	2	2	4	5	3	2
HOM001934	1	1	1	2	2	2	1	3	2	1	1	2	1	2	2	1	30	1	1
HOM001935	2	3	3	3	2	7	5	4	3	2	2	4	3	2	2	2	3	2	2
HOM001936	5	2	2	3	2	4	3	5	5	2	2	3	2	1	2	3	7	7	11
HOM001937	6	5	3	2	1	6	3	5	3	3	3	2	2	3	2	3	2	2	2
HOM001938	3	1	2	1	7	2	4	5	2	2	3	2	3	7	4	2	2	1	1
HOM001940	2	2	3	2	2	5	4	9	3	3	0	3	3	3	2	2	3	2	1
HOM001941	3	2	2	2	4	4	2	9	3	1	2	3	2	1	2	1	2	1	1
HOM001942	4	4	4	1	2	6	1	4	2	1	4	3	3	2	3	4	3	3	2
HOM001944	2	3	3	3	2	4	1	4	3	1	3	4	4	2	3	2	5	2	2
HOM001945	4	3	2	2	2	4	3	4	3	2	3	4	3	5	3	2	2	3	3
HOM001946	4	5	3	2	2	4	0	6	3	1	3	2	3	2	2	2	3	2	2
HOM001947	3	3	4	2	2	7	3	2	3	0	4	4	4	2	2	4	4	4	2
HOM001948	2	3	2	6	2	6	2	5	3	1	3	3	2	3	2	2	2	2	2
HOM001949	5	6	1	2	1	15	3	4	3	4	1	5	2	1	2	0	0	2	2
HOM001950	4	3	2	2	2	5	1	2	4	1	2	4	4	2	2	2	4	2	2
HOM001951	13	11	0	1	7	5	2	4	3	4	0	3	2	0	8	0	0	3	2
HOM001952	2	2	3	1	2	4	2	3	3	2	3	3	2	5	3	4	4	4	4
HOM001953	6	2	1	1	1	6	6	11	3	5	1	2	1	1	1	7	2	3	4
HOM001955	4	2	2	3	1	6	6	5	5	2	2	5	3	1	3	3	3	2	2
HOM001956	2	2	5	2	2	6	2	3	3	3	5	3	2	5	2	1	9	1	2
HOM001957	4	4	2	2	3	8	2	3	6	3	2	3	3	2	4	2	4	2	2
HOM001958	4	4	2	3	6	6	5	4	2	2	2	4	2	2	3	2	3	4	7
HOM001959	2	2	2	2	1	2	2	12	1	2	2	2	2	3	3	2	2	2	1
HOM001961	3	3	2	2	2	5	2	3	4	3	2	4	2	3	3	3	2	2	2
HOM001962	3	3	1	2	1	4	4	20	2	8	1	2	2	1	4	1	2	4	4
HOM001963	4	4	3	4	2	5	1	0	4	1	3	5	3	3	2	2	6	1	1
HOM001964	4	3	3	2	3	8	4	3	4	3	3	4	2	3	2	2	3	3	2
HOM001965	5	4	2	1	2	5	1	4	3	1	3	3	2	4	3	2	3	4	3
HOM001966	4	4	2	3	6	5	5	2	4	3	2	6	5	2	3	3	3	4	3
HOM001967	6	3	4	2	3	6	1	3	2	2	3	5	2	4	2	3	6	2	3
HOM001968	2	2	2	3	2	4	2	9	4	2	2	3	2	2	3	2	3	4	4
HOM001969	2	2	2	2	3	3	2	6	3	0	1	3	6	1	3	1	1	1	1
HOM001970	3	3	2	3	4	5	2	7	1	12	2	4	2	2	2	2	2	3	3
HOM001972	3	4	0	3	3	9	4	4	4	4	1	5	6	1	4	4	1	1	1
HOM001973	8	5	3	2	2	4	1	3	7	1	3	2	2	3	4	2	4	2	1
HOM001974	4	4	4	2	1	8	2	5	4	1	4	4	1	4	2	3	6	1	1
HOM001975	3	3	2	1	3	4	1	11	2	3	3	3	2	3	3	2	2	2	2
HOM001976	4	3	4	2	3	6	1	4	3	1	4	4	2	3	2	2	4	2	1
HOM001977	7	7	0	3	2	13	2	6	6	2	0	5	3	0	3	4	0	5	3
HOM001978	4	4	2	2	4	4	4	7	4	3	2	3	3	2	2	1	2	2	1
HOM001979	2	2	2	2	2	4	3	14	3	3	2	2	2	2	2	2	4	4	4
HOM001980	3	2	1	3	1	6	2	4	2	3	2	4	1	6	2	3	4	2	1
HOM001981	4	4	2	1	2	4	3	5	3	4	2	4	3	3	3	2	5	2	3
HOM001982	1	1	2	2	3	4	2	4	3	3	2	3	2	2	3	2	3	2	1
HOM001984	2	2	3	3	2	4	2	7	3	3	3	3	1	5	2	2	4	2	2
HOM001985	2	2	3	2	2	7	2	4	4	3	3	3	2	4	2	5	3	2	2
HOM001986	3	3	2	1	2	4	2	5	3	2	2	5	2	2	2	3	6	2	1
HOM001987	5	2	2	1	3	7	4	4	5	4	2	5	3	3	2	2	3	2	1
HOM001988	2	1	6	1	2	4	3	8	2	2	3	4	1	5	2	1	6	1	1
HOM001989	3	3	2	1	2	6	2	3	5	2	4	5	3	4	2	1	5	5	6
HOM001990	2	2	2	4	3	4	0	2	2	4	2	2	6	1	2	3	10	2	2
HOM001991	3	3	3	2	3	4	0	16	3	2	1	3	3	1	3	2	0	2	1
HOM001992	3	3	1	3	2	4	1	4	5	2	3	4	3	2	2	3	2	2	2
HOM001993	2	2	3	3	2	4	0	4	2	4	2	3	2	3	3	4	2	3	2
HOM001994	2	2	3	2	2	4	5	3	3	0	3	3	4	3	2	2	2	2	1
HOM001995	2	2	2	3	3	4	1	2	3	3	3	5	2	5	2	2	8	2	2
HOM001996	0	2	2	2	1	4	4	3	2	3	3	5	2	3	4	2	3	1	1
HOM001998	2	2	2	2	2	8	2	5	3	3	2	6	2	2	2	2	6	2	2
HOM001999	1	1	3	1	1	4	7	8	2	2	3	1	1	2	2	3	3	1	1
HOM002000	3	3	2	1	2	4	2	7	3	2	3	4	4	2	3	2	2	2	2
HOM002001	3	4	2	2	1	5	3	9	2	0	2	3	2	2	2	2	7	2	2
HOM002002	1	3	4	4	2	6	5	4	3	2	3	4	2	3	3	3	6	1	1
HOM002003	2	2	3	2	3	3	2	6	3	2	5	4	2	7	3	2	4	3	5
HOM002004	2	2	2	3	3	4	2	10	4	2	3	3	3	2	3	3	3	3	2
HOM002005	2	2	2	3	2	7	1	6	2	3	3	4	2	5	2	2	5	2	1
HOM002006	3	2	3	1	3	5	2	8	3	2	2	3	2	2	2	4	3	5	4
HOM002007	1	2	2	2	2	4	3	8	4	1	2	6	2	1	2	2	4	3	21
HOM002008	0	1	2	8	2	2	6	4	2	4	2	1	1	4	1	2	3	1	1
HOM002009	2	2	1	4	1	4	3	4	3	1	2	2	5	3	3	4	4	2	1
HOM002010	4	1	1	7	1	6	6	0	2	1	1	8	2	6	1	3	3	1	1
HOM002011	2	2	3	2	2	7	2	3	4	3	4	3	2	4	2	3	5	1	1
HOM002012	2	2	2	2	3	4	1	9	2	0	2	5	2	2	2	3	2	2	2
HOM002014	3	4	2	2	3	6	2	2	4	1	2	5	2	2	2	4	4	3	2
HOM002015	2	4	2	4	3	6	2	6	5	4	2	5	3	2	2	3	3	5	8
HOM002016	1	1	2	3	3	3	3	6	1	6	3	6	2	1	4	4	2	2	2
HOM002017	3	3	2	2	2	2	0	4	3	1	2	4	2	1	2	2	7	3	8
HOM002018	4	4	2	2	2	8	2	5	4	4	2	4	2	3	2	2	4	5	10
HOM002019	2	2	2	2	2	4	1	4	2	4	2	4	2	4	4	2	2	2	1
HOM002021	2	1	2	3	8	2	3	10	2	5	2	1	3	1	1	4	3	1	1
HOM002022	2	2	3	2	1	7	2	8	4	4	3	4	2	4	2	2	6	1	1
HOM002023	2	2	2	2	2	3	2	4	3	1	1	2	1	2	2	2	5	2	2
HOM002024	5	2	2	2	3	4	2	5	3	2	3	4	2	2	2	7	4	2	2
HOM002029	2	2	1	1	1	4	5	19	2	7	1	2	2	1	2	1	2	1	1
HOM002030	3	3	3	2	2	7	1	4	2	1	3	3	1	2	2	3	7	2	3
HOM002032	2	2	3	6	1	4	4	5	4	2	3	4	2	4	3	1	4	2	2
HOM002033	1	1	2	2	4	4	3	5	4	4	2	5	2	3	2	4	2	2	2
HOM002035	2	2	2	2	2	6	4	5	2	5	0	8	2	2	3	3	1	1	1
HOM002037	3	3	1	3	2	6	5	8	2	1	2	4	7	3	2	3	2	1	1
HOM002038	2	3	3	3	2	6	4	4	3	1	2	4	2	3	2	3	6	3	3
HOM002039	3	1	2	2	1	7	5	3	4	2	2	6	2	3	2	2	2	3	2
HOM002040	3	3	3	2	3	6	3	6	3	1	3	4	1	4	2	5	5	4	5
HOM002041	3	3	2	3	3	4	3	6	4	1	3	4	2	3	3	2	4	2	2
HOM002042	2	3	1	2	2	8	3	9	3	2	2	4	2	1	2	2	2	3	2
HOM002043	2	2	3	2	1	6	5	8	2	1	4	3	2	3	2	2	4	2	2
HOM002045	2	2	2	3	2	4	4	5	3	0	2	4	2	2	3	2	3	2	2
HOM002046	5	4	3	1	1	3	3	4	3	1	4	2	1	5	1	2	7	3	11
HOM002047	3	2	3	2	1	4	5	4	2	3	2	3	2	4	2	3	5	2	1
HOM002048	4	4	0	4	5	4	4	6	4	3	0	6	4	0	7	4	0	1	1
HOM002049	8	2	1	2	2	4	4	10	2	5	2	1	2	1	1	0	2	1	1
HOM002050	2	2	3	2	1	4	2	3	4	2	5	4	2	3	2	1	5	5	3
HOM002053	3	3	2	1	5	7	5	3	3	2	2	2	2	1	4	1	1	3	2
HOM002054	4	4	2	1	2	3	1	3	3	1	3	3	2	3	2	2	2	1	1
HOM002055	3	3	3	2	3	6	3	3	3	4	4	5	3	3	3	3	3	1	1
HOM002057	5	4	2	2	2	10	2	6	4	2	3	4	2	3	2	0	5	5	3
HOM002058	3	2	3	1	1	4	3	8	1	1	2	4	0	2	1	1	2	1	1
HOM002059	5	4	4	1	2	4	1	4	3	1	4	3	2	3	2	2	7	5	3
HOM002060	0	1	3	1	2	7	4	7	2	0	6	2	2	3	2	3	6	3	5
HOM002061	3	3	2	2	2	4	3	8	3	2	2	5	2	2	3	2	3	3	4
HOM002062	3	4	2	2	2	2	5	2	3	0	2	3	5	3	2	15	2	1	1
HOM002063	2	2	2	2	2	6	5	14	3	1	2	5	2	2	2	2	2	2	1
HOM002064	3	1	2	2	1	4	1	3	2	1	3	3	2	2	2	2	4	2	2
HOM002065	2	2	3	2	4	6	3	9	3	2	2	6	3	2	3	2	4	2	2
HOM002066	2	2	3	3	2	6	4	4	2	3	4	4	2	3	2	2	3	1	1
HOM002067	3	2	3	2	3	3	3	7	3	2	2	3	2	3	2	2	3	2	2
HOM002068	4	2	2	1	2	7	1	9	2	2	2	4	2	2	2	2	4	6	6
HOM002069	3	2	1	1	1	4	3	5	2	1	2	4	1	3	1	2	3	2	1
HOM002070	2	2	2	2	2	4	1	11	3	3	2	3	2	2	2	4	4	2	2
HOM002071	2	2	2	2	2	4	1	10	2	1	2	4	3	7	2	2	3	1	1
HOM002072	3	2	2	0	2	5	3	7	4	3	2	4	2	2	2	2	4	2	2
HOM002074	2	2	2	3	2	8	2	6	4	2	6	3	2	2	2	4	2	3	2
HOM002075	2	2	2	1	1	2	5	10	2	1	3	2	1	1	2	1	7	2	2
HOM002076	4	3	2	2	3	4	2	8	4	3	2	4	5	3	3	1	3	2	1
HOM002077	3	2	2	4	2	3	3	4	1	2	2	1	2	2	2	2	2	2	2
HOM002078	2	2	2	4	2	2	3	7	2	3	2	5	2	2	2	2	2	2	2
HOM002079	2	2	1	2	3	6	4	8	4	3	1	3	2	2	2	2	3	3	6
HOM002080	2	2	3	2	3	2	2	5	3	3	3	4	2	3	2	2	5	1	1
HOM002081	4	3	2	2	3	4	4	2	3	1	3	2	2	2	2	2	4	1	1
HOM002082	3	2	4	1	3	8	0	2	0	5	4	3	3	4	3	2	4	1	2
HOM002083	5	3	2	1	1	4	5	5	2	2	2	4	1	2	2	1	6	5	3
HOM002084	7	5	0	4	3	10	1	6	7	5	0	5	2	0	2	3	0	4	3
HOM002085	8	9	1	1	1	3	1	5	2	2	2	2	1	5	1	1	1	1	1
HOM002086	6	2	2	7	4	1	3	7	2	1	1	2	1	3	6	1	1	1	1
HOM002087	2	2	2	2	4	4	2	10	2	5	2	3	2	0	1	2	2	2	7
HOM002088	4	4	2	2	3	2	2	16	2	2	2	6	2	2	2	1	2	1	1
HOM002089	4	5	4	2	2	10	3	1	4	1	3	4	2	3	2	2	4	2	2
HOM002090	3	2	2	4	2	2	1	3	4	3	2	3	2	3	3	4	3	1	1
HOM002091	2	2	3	3	2	4	2	4	3	1	3	5	1	7	2	2	4	2	2
HOM002092	3	1	4	2	1	4	2	7	2	1	3	6	2	3	1	3	2	2	2
HOM002094	3	4	1	2	1	6	3	6	3	3	2	3	2	3	2	3	3	1	1
HOM002095	3	3	2	2	2	4	1	7	4	5	2	4	2	2	2	1	3	2	2
HOM002096	2	2	3	2	2	3	2	9	3	2	3	3	2	2	2	2	5	2	2
HOM002097	2	2	3	2	3	4	3	2	4	4	3	5	3	3	3	2	6	3	3
HOM002098	2	2	2	4	5	5	2	3	2	3	2	2	2	2	2	4	2	2	6
HOM002099	3	3	0	1	4	3	2	10	2	2	0	15	1	0	5	9	0	5	5
HOM002100	2	2	1	2	2	5	3	4	3	2	2	13	2	1	2	2	3	2	1
HOM002101	2	2	6	2	2	5	2	2	3	2	5	3	2	5	2	1	9	1	1
HOM002102	2	5	2	3	3	9	3	5	4	1	2	5	3	0	3	3	3	5	4
HOM002103	7	6	1	3	5	6	1	7	5	3	1	3	3	1	4	2	1	2	2
HOM002104	3	3	2	2	2	4	1	4	3	1	2	2	2	2	2	3	3	2	2
HOM002105	2	2	6	1	6	2	0	2	2	1	6	3	1	5	1	1	2	1	1
HOM002106	3	4	3	2	2	5	2	3	6	3	3	4	2	3	2	2	6	4	3
HOM002108	3	2	2	3	2	4	2	6	2	2	2	2	2	1	3	5	3	1	1
HOM002109	1	3	1	2	1	6	3	2	4	0	2	4	3	1	3	4	2	3	1
HOM002111	1	1	1	1	2	1	3	20	1	0	2	2	5	1	1	3	1	1	1
HOM002112	1	2	3	2	3	4	2	5	3	0	3	3	1	2	2	1	5	1	1
HOM002113	2	2	2	2	2	4	5	7	2	3	2	3	2	2	2	2	2	3	7
HOM002114	3	2	2	2	3	6	2	4	5	3	2	4	2	4	2	2	3	5	2
HOM002117	2	3	2	3	3	5	5	3	3	2	2	3	3	1	2	4	3	5	3
HOM002118	1	1	2	2	4	3	1	7	1	4	2	2	2	5	1	2	6	1	1
HOM002119	4	3	5	2	2	6	1	5	2	1	4	4	2	4	2	3	4	4	3
HOM002120	3	2	2	2	2	5	0	7	3	2	3	4	2	2	2	2	2	2	2
HOM002122	7	4	2	2	2	9	1	5	3	3	3	2	2	3	2	2	3	3	3
HOM002123	3	3	2	3	2	3	2	5	4	7	1	5	3	2	2	4	3	2	2
HOM002124	2	2	2	3	2	6	4	5	4	3	2	6	2	1	3	3	5	3	1
HOM002125	1	1	3	1	1	4	0	4	2	3	3	2	7	3	1	1	4	2	2
HOM002126	2	2	1	1	3	2	3	3	3	5	1	4	3	1	2	2	1	1	1
HOM002127	2	3	2	2	2	3	4	4	3	3	4	4	1	3	2	1	3	2	2
HOM002128	18	15	1	1	1	2	0	3	1	0	2	1	1	1	1	1	0	1	1
HOM002129	2	2	3	1	2	5	4	8	3	1	2	3	2	4	2	3	3	2	2
HOM002131	3	4	3	2	2	4	2	4	3	1	4	2	2	4	2	3	6	4	4
HOM002132	1	2	2	3	3	7	3	9	4	2	2	5	2	2	2	2	2	6	4
HOM002133	4	3	2	2	3	7	2	3	2	0	2	4	2	2	2	2	5	3	3
HOM002134	2	2	3	2	2	4	1	5	3	2	2	2	2	2	2	2	5	2	2
HOM002135	4	4	2	3	2	10	4	5	4	2	1	5	1	2	3	3	2	1	1
HOM002136	1	1	2	1	3	4	3	11	2	4	5	4	1	2	1	1	2	1	1
HOM002137	3	4	3	2	2	4	2	4	4	2	3	6	4	4	4	2	3	4	4
HOM002138	4	2	1	2	4	4	2	3	4	2	2	3	2	3	1	3	3	1	1
HOM002141	2	2	2	3	2	5	1	11	3	5	2	4	4	2	2	2	1	3	3
HOM002142	2	2	1	1	2	7	2	6	4	16	1	4	1	2	2	3	2	2	4
HOM002143	4	2	2	3	2	4	2	2	4	5	2	4	3	2	1	2	2	2	1
HOM002145	1	1	1	2	4	10	8	7	4	5	2	3	2	0	3	3	3	2	2
HOM002146	4	3	3	2	3	3	5	1	1	0	4	2	1	3	2	2	4	4	2
HOM002147	3	3	2	2	3	7	2	3	4	6	2	4	2	2	2	2	2	1	2
HOM002148	2	2	4	2	2	4	2	10	4	2	2	3	2	2	2	2	3	2	4
HOM002149	2	2	3	3	1	5	2	3	3	1	3	3	3	3	3	3	5	2	2
HOM002150	3	2	2	3	2	4	1	5	4	3	2	5	3	1	4	2	3	2	2
HOM002151	3	2	2	2	4	5	1	12	3	1	3	3	1	3	2	2	5	2	2
HOM002153	6	4	2	2	2	3	1	5	2	1	2	4	1	2	3	3	4	3	2
HOM002154	4	1	2	1	1	6	3	3	1	1	1	2	5	2	1	6	2	1	1
HOM002156	1	1	3	2	4	4	2	4	2	3	5	3	2	5	2	2	3	2	1
HOM002157	2	2	2	4	3	7	3	7	2	5	2	4	1	2	1	2	2	2	1
HOM002158	4	3	2	2	2	4	2	7	2	2	3	5	2	2	2	2	4	2	1
HOM002159	2	2	3	2	4	5	1	6	3	1	2	5	2	3	2	2	3	2	2
HOM002160	2	2	0	3	3	10	2	8	3	4	1	7	3	2	4	1	2	2	2
HOM002161	4	4	3	3	2	9	2	4	3	2	2	5	2	0	2	4	4	2	2
HOM002162	2	2	2	2	1	4	5	5	2	2	3	2	1	2	1	1	6	1	1
HOM002163	1	1	2	1	3	3	4	5	2	2	2	2	1	3	1	1	2	1	1
HOM002164	2	2	2	3	2	3	3	3	2	1	2	2	5	2	1	2	5	1	1
HOM002165	2	2	5	1	2	2	0	2	2	1	5	2	1	4	2	1	5	2	2
HOM002166	2	1	1	2	2	5	1	7	6	3	2	11	3	3	3	1	2	2	2
HOM002168	1	1	2	2	2	5	3	9	4	2	3	4	2	1	2	3	2	2	3
HOM002169	2	2	2	3	2	4	2	6	2	0	2	4	2	2	2	3	3	2	2
HOM002170	2	3	2	2	6	2	3	4	2	3	3	2	1	5	1	1	3	3	5
HOM002171	3	3	4	2	2	6	3	4	3	2	3	4	2	2	2	2	3	3	3
HOM002172	2	3	3	4	6	3	3	5	2	3	3	1	2	2	2	2	1	2	2
HOM002173	2	2	2	3	2	3	1	6	4	3	2	3	2	2	2	2	4	2	2
HOM002175	3	3	3	3	4	6	2	4	4	0	4	2	2	3	3	2	5	2	1
HOM002177	2	2	2	2	2	4	2	6	2	4	2	3	1	3	2	4	4	3	8
HOM002179	1	1	1	5	1	2	3	8	3	1	1	4	2	1	4	1	2	2	3
HOM002180	4	3	2	2	2	7	4	6	4	4	3	3	2	2	2	2	2	2	2
HOM002181	6	6	0	2	3	9	1	7	5	3	0	5	3	0	5	3	0	1	1
HOM002182	5	4	2	1	3	2	3	2	2	2	2	2	4	3	2	8	2	1	1
HOM002183	2	2	5	2	5	2	1	4	2	0	5	2	1	4	1	1	6	1	1
HOM002184	6	6	2	2	2	4	2	5	2	5	2	3	3	2	2	2	2	2	2
HOM002186	3	3	2	2	1	3	2	6	3	2	4	4	2	2	2	2	3	2	2
HOM002187	2	2	3	2	4	6	1	3	3	3	3	3	2	2	2	1	3	2	2
HOM002188	3	3	1	3	2	2	1	6	1	3	3	3	1	4	1	7	1	2	2
HOM002189	3	3	1	2	1	6	3	5	2	4	1	4	3	1	4	1	2	2	2
HOM002190	3	3	2	1	2	4	2	5	4	0	2	2	2	2	2	2	5	2	2
HOM002191	2	3	2	2	1	6	5	5	2	2	2	4	2	3	2	2	3	3	3
HOM002192	3	3	3	2	2	5	2	2	4	3	3	1	2	4	2	1	7	1	1
HOM002193	1	1	1	3	1	5	2	5	2	4	1	1	2	1	1	19	1	1	1
HOM002194	2	2	3	3	2	4	3	4	3	1	2	7	2	2	3	2	3	1	1
HOM002196	2	3	2	2	2	4	1	4	2	2	3	4	2	2	2	2	2	2	1
HOM002197	3	3	3	2	2	4	2	5	3	1	3	4	2	3	2	2	3	1	1
HOM002198	3	2	4	2	4	4	0	3	4	1	3	3	4	1	3	3	2	4	4
HOM002200	6	3	1	1	1	2	3	8	2	5	1	3	1	3	3	1	1	3	3
HOM002201	2	2	1	5	2	5	5	5	4	2	1	3	2	1	2	3	1	1	1
HOM002202	3	3	2	2	2	6	4	2	3	4	3	3	2	2	4	4	1	1	1
HOM002203	4	4	2	2	1	4	3	3	2	0	2	3	2	3	2	2	4	4	3
HOM002204	1	1	1	3	2	4	0	12	3	3	2	5	4	2	2	2	1	1	1
HOM002205	2	2	1	2	2	5	4	5	3	8	1	4	2	1	3	3	1	1	1
HOM002206	2	2	2	2	2	3	2	3	3	8	2	4	2	2	3	2	3	2	2
HOM002207	3	3	4	1	2	4	1	3	3	3	4	2	2	5	2	2	7	3	1
HOM002208	2	2	2	2	4	4	2	4	4	6	3	4	2	4	2	1	5	3	2
HOM002209	1	1	3	2	2	4	4	7	2	3	3	3	2	1	2	2	4	2	2
HOM002210	3	2	2	1	2	5	3	2	3	1	2	4	3	2	4	2	8	4	8
HOM002211	2	2	3	2	2	5	1	4	3	3	3	6	2	3	3	2	4	3	6
HOM002212	2	1	2	4	1	3	2	7	3	2	2	2	1	2	2	4	6	1	1
HOM002213	4	3	2	2	1	8	4	9	4	6	1	3	2	1	2	1	2	3	2
HOM002214	2	1	8	1	0	2	1	2	1	1	8	2	1	6	1	1	8	5	12
HOM002215	2	2	1	1	5	5	2	4	4	2	2	4	2	1	2	2	2	3	8
HOM002216	4	3	2	1	2	6	2	5	3	2	3	4	1	2	2	2	4	2	2
HOM002217	3	3	2	3	2	4	4	6	3	6	2	4	1	3	2	2	1	2	1
HOM002218	2	2	2	2	3	3	2	3	3	3	2	5	3	2	2	1	2	2	2
HOM002219	4	2	2	2	7	3	0	6	3	3	2	4	2	2	1	2	2	2	1
HOM002220	1	1	3	1	3	3	2	7	3	2	2	4	2	2	5	2	4	2	1
HOM002222	5	2	2	3	2	4	4	5	1	3	2	3	1	1	2	2	4	5	5
HOM002223	1	2	3	2	2	3	1	8	3	1	3	2	2	4	2	1	3	2	2
HOM002224	2	2	2	2	3	3	2	7	2	2	2	2	2	2	2	1	5	3	3
HOM002225	2	2	3	2	2	6	2	4	2	1	4	5	2	2	2	2	4	1	2
HOM002226	4	4	2	2	2	9	4	3	3	0	3	4	2	3	2	2	4	3	3
HOM002227	2	2	1	2	2	5	1	10	7	1	1	4	4	2	5	2	2	1	1
HOM002228	3	2	1	1	4	4	2	11	3	2	2	3	1	2	2	0	3	2	2
HOM002229	2	2	2	2	2	5	2	4	2	2	2	3	2	2	2	3	4	2	2
HOM002230	1	1	1	4	1	3	9	7	5	0	2	4	1	4	4	1	3	2	9
HOM002232	4	4	2	1	2	5	2	6	3	3	2	5	2	2	2	2	3	3	2
HOM002233	3	2	2	2	3	3	6	3	3	1	1	3	2	2	3	2	3	1	1
HOM002235	3	3	2	1	2	6	3	7	2	3	1	3	2	2	1	2	3	3	6
HOM002236	4	4	2	2	6	4	2	1	3	3	2	4	2	2	3	2	3	3	3
HOM002237	2	2	3	2	3	5	0	4	2	0	3	5	1	3	2	2	3	2	2
HOM002238	4	3	3	4	3	4	2	3	4	1	2	4	2	2	3	2	2	3	2
HOM002239	2	2	0	3	2	12	4	7	7	4	0	6	3	0	4	1	0	3	1
HOM002240	8	2	2	2	2	4	2	6	3	2	2	4	2	3	2	2	1	1	1
HOM002241	2	3	2	1	2	5	1	6	4	1	2	5	3	2	3	7	2	1	1
HOM002242	4	4	5	1	1	5	3	3	2	2	4	2	1	4	1	1	7	2	1
HOM002243	2	2	2	5	2	3	2	3	3	0	2	4	2	2	2	1	4	2	2
HOM002244	2	2	2	3	1	3	4	16	3	5	3	3	1	2	1	1	2	2	2
HOM002245	3	3	2	3	3	6	2	4	3	1	3	5	2	2	3	3	4	3	4
HOM002246	2	2	2	3	4	2	2	14	2	3	2	3	2	2	2	1	2	2	2
HOM002247	2	2	2	2	2	6	2	6	4	3	2	6	4	2	2	2	4	3	3
HOM002248	3	2	4	2	2	6	5	3	3	2	2	5	2	3	3	2	2	2	2
HOM002250	1	1	1	2	2	6	3	9	3	2	2	2	2	2	2	3	2	2	5
HOM002251	2	2	3	4	3	6	4	8	2	0	1	5	2	0	2	1	1	1	1
HOM002252	1	1	2	2	2	5	3	4	3	4	2	4	2	2	2	2	2	1	1
HOM002253	2	3	3	2	1	7	6	6	4	2	1	2	2	3	2	2	5	3	3
HOM002254	2	2	2	2	3	4	2	3	2	2	2	5	2	4	2	2	3	2	6
HOM002255	2	2	2	3	2	5	2	5	4	1	2	4	2	2	2	2	2	2	2
HOM002256	2	2	2	2	3	6	3	3	2	1	2	2	2	1	3	2	3	2	3
HOM002257	2	2	2	2	2	4	1	9	2	2	2	8	2	3	2	2	2	2	2
HOM002258	2	2	1	2	2	3	9	7	4	2	1	1	1	1	1	2	2	1	1
HOM002259	4	3	2	2	1	3	3	5	3	0	2	3	2	2	2	2	3	4	3
HOM002260	2	2	2	3	2	5	5	4	3	0	2	3	3	2	2	2	3	2	2
HOM002261	2	2	1	2	3	8	3	8	2	2	2	3	3	2	3	4	3	2	2
HOM002262	2	2	1	3	1	5	2	2	5	6	1	2	2	3	2	2	2	2	7
HOM002263	1	1	3	1	2	6	3	4	3	2	3	3	1	3	2	2	5	1	1
HOM002264	3	3	1	2	3	6	2	6	3	3	3	5	3	1	2	4	1	2	2
HOM002265	5	3	2	2	3	6	1	3	3	2	2	3	2	4	2	2	2	2	2
HOM002267	2	3	2	2	2	5	2	3	4	1	2	3	2	0	2	3	6	2	1
HOM002268	1	1	9	1	1	2	1	0	1	0	12	2	1	4	2	1	0	1	1
HOM002270	3	1	3	1	1	4	2	7	2	1	6	2	2	5	1	1	7	1	1
HOM002271	2	2	2	1	1	5	2	4	3	2	2	4	2	3	2	2	5	2	3
HOM002272	2	2	1	1	4	4	2	8	4	4	1	4	2	1	2	1	1	2	1
HOM002273	2	2	2	2	3	3	1	3	2	3	2	2	2	2	4	2	2	2	2
HOM002275	1	2	2	2	1	4	1	4	2	2	4	3	2	1	1	2	2	1	1
HOM002276	5	3	2	6	3	4	3	1	2	3	2	3	2	4	1	4	3	3	3
HOM002278	3	2	2	2	2	8	3	3	3	2	2	4	2	2	2	3	5	2	2
HOM002279	4	2	2	2	4	4	2	10	3	1	2	4	2	1	2	2	2	2	2
HOM002280	2	2	2	2	3	4	3	3	2	1	2	4	2	3	2	2	3	2	2
HOM002281	1	1	3	1	2	5	4	8	4	5	2	3	4	2	2	3	2	1	1
HOM002283	2	2	2	1	2	5	1	2	2	1	2	4	2	2	2	2	3	1	1
HOM002284	4	2	3	2	2	6	3	3	2	0	5	2	3	5	2	3	3	5	16
[truncated: 2,936 more rows]

## Sheet: S.rexii.increase
	AL	AT	BD	CP	FV	GM	LJ	MD	ME	MT	OS	PT	RC	SB	TC	VV	ZM	Sr_reclustering	Sr_oases			AL	AT	BD	CP	FV	GM	LJ	MD	ME	MT	OS	PT	RC	SB	TC	VV	ZM
HOM000001	265	242	277	354	290	490	251	746	304	274	293	313	292	270	309	315	272	260	204		Sr_reclustering	0.895757	0.871294	0.853819	0.917359	0.815595	0.898666	0.888664	0.835417	0.899077	0.699715	0.776327	0.772736	0.910628	0.699594	0.817399	0.842654	0.906524
HOM000002	156	122	202	123	230	317	167	760	232	300	307	359	187	256	282	209	191	143	123		Sr_oases	0.880612	0.857465	0.836551	0.899374	0.802405	0.884693	0.879063	0.819731	0.885908	0.687829	0.757953	0.758675	0.892924	0.685912	0.800282	0.822563	0.891943
HOM000003	214	219	192	197	247	369	234	471	207	257	203	280	206	233	212	165	238	171	154
HOM000004	192	179	175	147	166	409	197	346	335	191	184	295	180	181	165	160	248	197	174
HOM000006	145	116	125	59	156	235	125	496	148	423	157	324	103	141	165	179	99	73	58
HOM000007	151	143	107	102	119	312	105	293	197	109	127	211	132	122	138	153	185	91	69
HOM000009	5	4	91	30	90	106	57	500	132	282	225	184	75	159	123	172	59	3	2
HOM000010	119	117	108	76	97	298	125	199	159	110	122	172	92	127	96	77	175	71	56
HOM000012	74	74	142	57	67	185	99	168	104	105	149	117	75	148	80	76	144	36	30
HOM000013	109	111	129	63	73	198	76	168	115	98	148	113	75	158	95	40	170	64	45
HOM000014	106	98	90	62	68	185	79	172	110	76	97	115	64	89	64	64	130	88	81
HOM000016	60	60	99	45	98	159	80	183	84	151	136	149	70	141	102	58	104	56	40
HOM000017	80	94	86	57	82	169	83	208	96	75	118	121	69	81	109	72	73	54	49
HOM000018	102	96	75	61	84	159	92	188	113	67	94	141	79	88	85	68	117	48	37
HOM000020	96	69	72	68	69	141	88	204	85	108	77	97	85	75	68	96	74	39	28
HOM000021	110	95	83	63	80	150	61	170	90	76	86	125	61	75	66	58	94	43	36
HOM000022	31	47	34	13	88	199	46	322	117	140	70	168	52	42	179	84	18	7	2
HOM000023	65	55	72	39	97	105	48	246	87	83	96	133	71	91	72	83	80	45	31
HOM000024	25	20	185	10	45	70	8	87	45	49	297	52	53	207	52	58	66	10	5
HOM000026	2	4	65	46	70	32	24	2	7	36	52	433	25	394	24	4	4	2	1
HOM000028	78	71	82	53	54	177	64	142	106	82	95	106	62	85	58	59	122	68	51
HOM000029	82	84	70	52	75	148	91	123	69	93	60	126	80	70	75	71	65	32	24
HOM000030	69	62	54	79	57	135	80	146	75	63	55	94	52	59	58	73	83	53	44
HOM000031	65	59	87	59	71	131	75	157	79	84	100	87	66	99	69	55	85	40	39
HOM000034	80	70	33	49	65	134	79	149	90	97	47	101	64	46	56	63	47	34	27
HOM000035	61	48	94	24	81	61	22	126	21	42	163	113	51	111	51	40	57	17	8
HOM000039	64	60	52	93	59	127	53	125	82	62	55	92	45	55	58	51	81	20	14
HOM000040	52	51	55	58	60	99	66	153	63	66	65	74	60	79	52	47	66	31	28
HOM000041	82	54	72	23	47	94	44	124	57	61	116	62	46	80	52	44	58	16	12
HOM000042	41	37	49	46	56	112	52	119	77	66	58	94	49	78	44	42	88	44	39
HOM000045	16	27	90	37	90	103	16	132	28	82	33	65	30	211	39	37	22	26	24
HOM000048	12	7	2	18	231	112	111	117	50	310	1	60	37	1	61	10	0	2	1
HOM000049	58	61	26	35	53	244	52	70	85	106	24	74	17	31	68	42	38	17	16
HOM000050	49	47	47	42	43	122	61	92	59	49	66	70	48	63	55	44	59	42	33
HOM000051	21	37	27	23	41	63	32	57	50	130	74	104	61	103	80	24	21	15	10
HOM000055	52	39	62	33	66	79	37	106	52	58	56	67	38	60	54	32	56	19	17
HOM000057	61	55	41	38	42	84	40	113	54	34	44	71	36	37	39	44	58	42	40
HOM000058	39	33	40	36	44	99	35	132	46	61	50	48	29	45	29	25	56	76	75
HOM000059	46	46	51	32	41	119	60	17	57	66	56	51	41	59	58	47	46	19	17
HOM000061	46	41	41	31	30	75	41	79	54	26	47	59	33	47	40	39	58	37	31
HOM000063	49	44	40	37	38	89	55	105	56	35	47	64	42	42	35	32	51	41	32
HOM000064	62	50	32	30	35	63	42	123	66	36	41	46	32	42	31	44	33	18	14
HOM000065	34	35	61	27	32	83	36	77	42	23	58	38	26	79	28	31	93	21	12
HOM000066	32	34	24	36	59	30	25	94	54	41	54	66	51	47	47	96	37	10	8
HOM000067	12	39	35	24	35	49	12	79	47	32	78	64	41	51	102	78	22	14	11
HOM000068	41	38	42	29	42	71	25	107	54	25	35	55	31	30	37	38	60	53	52
HOM000070	63	63	31	41	49	67	47	85	89	38	32	66	34	26	30	51	41	10	5
HOM000073	26	18	21	26	44	65	21	102	47	39	44	126	32	29	42	77	28	24	16
HOM000074	19	20	53	28	36	62	32	84	41	33	68	67	36	53	32	38	61	27	17
HOM000075	45	46	37	34	28	91	34	60	56	31	43	59	34	41	31	34	60	44	40
HOM000076	39	36	30	54	34	68	52	86	43	24	37	50	26	30	28	28	50	36	26
HOM000077	30	28	40	27	44	63	30	62	44	33	51	70	40	61	46	54	41	9	4
HOM000078	17	21	42	22	54	54	22	81	54	23	48	59	26	50	38	54	42	28	23
HOM000079	39	40	34	39	92	59	22	79	46	36	45	54	41	31	53	18	42	18	14
HOM000080	42	34	41	29	31	79	27	68	53	30	41	63	36	38	38	38	53	30	24
HOM000086	21	25	46	17	20	42	31	59	42	33	64	38	23	57	33	30	52	9	8
HOM000087	29	28	28	29	31	65	37	58	35	26	28	39	27	31	26	27	39	24	23
HOM000089	39	33	32	23	33	70	36	55	39	37	30	42	53	37	36	36	35	26	17
HOM000090	33	27	28	23	25	53	29	89	28	18	26	33	22	19	23	24	35	26	25
HOM000092	31	35	27	27	31	78	34	91	44	33	38	47	28	34	30	29	37	26	24
HOM000093	43	35	36	20	38	42	26	69	30	50	50	44	25	42	42	27	39	17	15
HOM000096	21	21	36	24	60	64	34	59	32	28	34	64	32	36	41	62	29	19	12
HOM000098	39	37	20	31	30	70	38	52	49	28	30	43	29	27	29	37	35	9	7
HOM000099	35	36	27	21	24	79	24	57	44	26	30	44	22	29	24	22	46	25	18
HOM000102	22	27	37	18	20	54	19	54	31	28	38	40	19	45	20	21	53	22	11
HOM000103	26	28	23	24	26	87	29	40	34	36	38	37	21	44	19	23	44	29	28
HOM000106	29	30	22	23	19	46	38	50	27	30	34	32	23	32	17	42	38	26	25
HOM000108	27	25	24	27	24	56	33	42	34	21	25	33	22	22	22	23	31	25	23
HOM000111	30	22	20	25	21	45	19	53	27	15	20	34	21	22	18	18	33	20	19
HOM000112	33	29	22	21	23	56	19	51	39	22	23	39	24	18	21	24	29	21	17
HOM000113	32	25	18	16	21	51	23	53	34	20	23	35	17	26	22	25	27	21	11
HOM000116	28	20	21	13	55	37	17	78	20	33	25	76	22	23	33	33	11	15	12
HOM000119	20	18	24	20	20	51	27	59	30	24	29	31	19	25	22	21	30	21	15
HOM000123	29	20	17	17	67	40	33	114	29	24	17	33	16	15	17	15	18	13	10
HOM000124	29	29	24	20	18	63	14	56	39	19	28	37	21	24	19	19	42	34	23
HOM000127	4	5	22	2	20	14	4	33	1	12	12	80	7	85	128	2	13	2	1
HOM000129	39	25	27	19	16	56	19	55	35	26	25	33	19	22	19	19	28	22	14
HOM000130	24	23	22	26	28	38	11	19	22	33	19	28	23	21	22	15	21	15	14
HOM000133	30	28	15	29	27	46	32	51	28	50	20	33	33	18	27	19	16	4	3
HOM000134	22	21	28	15	19	32	19	60	29	31	29	36	19	32	22	20	30	28	23
HOM000135	26	23	20	15	16	46	20	40	25	59	40	29	18	30	15	14	30	16	15
HOM000136	20	15	16	23	24	34	31	70	28	17	18	35	23	19	27	25	26	14	11
HOM000138	45	36	20	19	32	40	32	44	21	18	27	29	22	30	26	11	23	17	14
HOM000139	14	13	14	21	15	52	14	72	43	22	18	33	29	19	25	29	26	5	4
HOM000141	11	7	23	14	28	26	21	29	33	30	20	29	20	27	27	25	28	7	6
HOM000142	23	25	12	25	13	31	14	71	25	18	43	28	19	20	40	40	15	8	6
HOM000144	2	2	41	6	94	8	9	43	3	23	10	50	1	54	24	5	2	6	5
HOM000145	31	22	15	28	21	44	31	50	33	28	16	23	24	19	24	30	18	9	8
HOM000146	24	23	21	17	19	54	21	35	32	19	22	39	20	25	21	22	27	20	13
HOM000147	21	19	18	16	16	45	24	45	24	25	19	36	17	20	20	14	24	19	17
HOM000148	6	12	9	7	32	11	8	57	5	46	17	26	11	153	7	9	26	6	3
HOM000149	32	27	20	13	20	50	18	46	26	25	22	32	18	27	17	11	27	13	12
HOM000150	18	18	21	19	17	61	21	45	32	22	21	30	19	20	19	18	27	21	16
HOM000152	15	17	18	15	17	47	19	40	22	11	19	31	16	21	16	20	33	20	16
HOM000153	32	27	13	23	18	52	16	6	20	24	21	76	18	15	44	19	16	12	8
HOM000154	23	20	26	26	10	26	11	24	29	8	33	31	34	36	25	25	29	3	2
HOM000155	28	27	26	16	19	47	17	35	30	14	28	25	17	26	15	10	50	7	5
HOM000156	19	14	13	17	14	26	27	38	20	17	14	28	13	16	18	24	16	13	10
HOM000158	18	17	19	15	17	55	19	55	24	41	17	24	15	25	12	17	28	11	9
HOM000159	14	13	24	14	16	50	22	29	21	26	31	33	17	29	15	27	27	13	12
HOM000160	25	17	18	15	17	52	16	34	28	18	23	27	18	21	22	17	24	7	4
HOM000163	26	26	8	18	17	39	24	51	30	33	12	29	17	10	16	18	15	22	18
HOM000164	23	25	19	16	16	45	14	32	28	22	20	28	16	23	17	14	29	16	15
HOM000165	26	23	19	14	13	38	14	45	16	32	21	24	12	22	15	18	26	16	11
HOM000166	26	24	23	20	18	37	14	42	19	20	25	29	21	27	15	11	22	14	13
HOM000168	14	14	27	16	12	48	16	29	29	16	25	34	17	28	21	10	42	5	4
HOM000169	31	23	13	10	23	25	8	24	20	27	40	17	16	14	14	20	21	11	10
HOM000170	14	14	34	13	27	38	20	31	15	18	29	22	13	28	25	12	19	21	20
HOM000171	18	17	19	16	15	31	21	23	27	12	20	32	17	17	19	16	25	19	15
HOM000173	20	17	14	23	22	39	14	48	24	19	13	28	16	15	23	20	16	17	12
HOM000174	14	14	20	19	15	42	20	31	20	15	20	32	17	19	20	19	27	15	11
HOM000176	24	21	18	19	13	39	20	28	23	24	14	24	20	20	20	15	20	11	9
HOM000178	22	14	13	39	13	24	29	51	24	21	17	16	10	15	17	13	23	14	13
HOM000179	18	18	15	12	14	37	27	50	19	9	18	21	12	13	14	14	35	80	76
HOM000182	47	141	0	24	9	4	2	12	12	2	0	27	12	0	111	2	0	9	6
HOM000183	19	14	14	13	14	28	16	30	15	29	19	22	15	13	13	14	20	14	9
HOM000187	21	19	16	11	17	32	15	44	21	25	15	20	12	13	18	10	33	19	15
HOM000188	23	16	20	12	11	37	14	43	21	16	23	26	12	21	14	16	31	18	16
HOM000189	12	10	10	16	20	29	33	45	24	16	15	17	13	20	16	23	17	7	6
HOM000190	10	9	17	8	23	22	9	63	15	7	18	41	16	22	18	31	21	11	10
HOM000191	44	35	10	15	19	25	15	32	17	38	12	25	14	11	10	11	18	13	9
HOM000192	20	21	18	13	18	25	8	19	19	4	24	20	28	25	21	30	13	7	5
HOM000193	16	16	8	15	20	44	10	35	20	19	15	39	19	9	30	22	9	12	11
HOM000196	23	21	17	23	11	36	17	20	15	26	20	23	12	19	14	22	26	16	14
HOM000198	21	17	17	12	14	33	18	29	20	34	19	20	11	18	11	9	26	14	10
HOM000201	16	14	9	11	13	29	12	24	16	11	16	17	11	11	10	12	13	10	6
HOM000204	15	13	15	24	16	21	14	27	18	18	15	15	13	20	14	12	23	13	12
HOM000205	15	23	22	8	10	36	16	18	18	21	32	15	14	24	22	6	29	10	9
HOM000206	94	117	0	4	7	9	50	7	1	26	0	6	4	0	33	3	0	2	1
HOM000207	15	18	23	2	12	10	8	19	14	22	36	39	27	18	33	19	5	17	15
HOM000208	13	11	17	12	14	28	8	40	19	16	16	20	12	16	13	11	20	11	10
HOM000211	22	9	24	8	12	16	29	23	12	35	30	12	11	17	10	12	27	8	4
HOM000212	11	13	16	14	11	28	16	46	21	15	14	28	15	24	14	14	16	11	8
HOM000213	16	15	8	16	14	13	14	46	9	12	13	19	13	30	14	57	15	5	4
HOM000216	16	17	15	12	10	51	19	28	25	17	14	18	11	16	16	11	21	10	7
HOM000219	12	12	16	12	9	27	25	36	17	21	18	16	11	18	11	11	19	12	9
HOM000220	16	13	16	11	20	26	20	26	16	19	17	24	13	13	14	19	18	15	10
HOM000222	9	9	8	15	20	19	8	58	20	19	12	24	10	13	13	36	8	9	8
HOM000224	21	15	14	13	7	33	17	24	18	17	11	21	10	11	9	9	21	9	8
HOM000225	16	13	16	12	11	39	14	36	18	14	13	21	14	14	15	16	19	7	4
HOM000227	22	20	15	13	14	25	12	27	18	11	15	24	14	14	13	13	21	11	8
HOM000228	19	17	12	14	10	39	15	29	22	14	14	27	15	10	15	17	14	16	12
HOM000230	3	18	15	13	12	34	29	35	13	34	15	17	9	29	15	11	19	12	10
HOM000232	10	9	0	13	46	14	14	75	25	8	0	42	41	0	30	7	0	8	7
HOM000234	19	17	16	13	14	28	24	26	17	17	15	25	12	10	15	14	17	15	13
HOM000236	13	12	13	9	17	24	9	26	20	10	25	16	18	26	19	15	24	6	5
HOM000238	4	4	11	4	6	18	21	17	11	21	34	18	6	39	8	25	16	3	2
HOM000239	15	15	17	8	12	18	8	16	11	26	23	17	8	24	17	31	22	7	5
HOM000243	13	13	15	11	15	29	14	33	20	7	7	30	11	14	14	11	19	12	11
HOM000244	18	19	10	14	15	33	22	36	21	20	11	20	12	11	15	15	17	12	8
HOM000246	26	16	14	10	11	21	19	25	12	18	17	19	14	17	12	10	17	9	8
HOM000247	11	10	11	14	12	31	18	46	18	12	10	23	12	9	14	19	10	10	9
HOM000249	14	14	18	10	8	34	14	39	17	12	18	16	11	20	10	10	23	12	9
HOM000251	17	17	12	13	13	34	12	35	19	14	15	20	11	13	13	10	18	16	13
HOM000255	18	15	17	9	11	23	9	27	18	10	20	18	12	17	10	10	18	8	7
HOM000256	12	12	11	12	8	24	13	35	16	23	12	18	10	13	10	11	21	9	8
HOM000259	14	13	12	18	9	28	21	35	13	14	13	21	10	14	10	10	17	11	10
HOM000260	14	13	16	7	13	29	15	32	11	35	23	26	8	17	15	6	10	8	5
HOM000262	15	15	13	11	11	43	20	25	20	14	15	22	11	14	11	6	21	12	9
HOM000263	12	12	15	10	9	40	15	21	16	17	20	17	11	15	13	8	24	18	11
HOM000264	14	15	15	14	19	27	10	20	17	15	17	15	16	15	19	13	15	13	10
HOM000266	13	15	8	13	19	35	20	25	18	9	12	22	13	11	17	15	11	10	7
HOM000267	10	14	10	10	16	18	19	57	15	10	12	24	15	12	13	15	11	5	4
HOM000268	20	16	15	16	9	23	10	19	13	30	16	20	10	11	11	12	15	10	6
HOM000269	15	13	14	7	12	21	10	19	10	14	13	15	9	14	8	7	20	9	5
HOM000270	12	11	15	10	10	31	12	10	22	16	16	20	11	15	14	13	15	5	4
HOM000271	15	17	15	11	11	30	16	23	25	33	12	23	11	8	10	9	16	17	9
HOM000272	15	14	13	7	9	16	7	27	19	9	18	23	9	18	11	15	19	13	12
HOM000273	11	11	13	11	13	23	12	39	15	12	17	24	11	15	13	15	13	5	4
HOM000276	7	7	5	6	4	21	12	13	12	127	6	17	6	7	6	14	7	10	7
HOM000277	13	13	15	11	11	34	13	29	15	7	14	24	10	12	11	14	18	17	13
HOM000279	14	13	14	9	8	25	13	33	18	10	15	17	10	16	12	8	24	11	8
HOM000281	20	13	16	10	19	20	12	20	14	13	17	16	10	19	9	9	16	7	4
HOM000282	17	12	12	10	11	33	24	21	20	15	11	16	11	9	10	11	19	14	12
HOM000284	24	19	12	7	21	19	29	28	8	30	12	14	9	11	14	13	7	5	2
HOM000285	16	12	11	9	10	20	9	20	30	17	15	20	13	15	12	12	14	8	6
HOM000290	15	13	24	3	23	2	45	41	3	29	20	8	6	18	3	1	5	2	1
HOM000291	19	20	9	10	9	26	12	21	13	11	16	14	10	16	21	9	13	11	8
HOM000293	16	12	10	13	16	26	7	50	16	12	10	19	11	9	16	9	17	13	8
HOM000298	8	8	12	10	12	33	13	32	17	8	15	23	8	10	9	12	16	11	7
HOM000299	10	6	5	5	5	18	16	14	10	10	7	11	23	3	5	9	9	12	9
HOM000300	14	14	11	10	11	33	13	24	16	14	11	16	9	12	12	9	18	11	8
HOM000304	10	7	13	7	10	11	8	41	17	3	12	27	9	10	16	12	13	10	9
HOM000305	14	10	17	5	10	27	10	20	15	10	20	15	11	22	8	5	26	6	5
HOM000306	15	14	13	7	10	25	16	27	12	7	18	13	6	16	8	9	20	14	9
HOM000309	16	9	21	11	14	15	16	24	9	9	12	10	9	12	7	8	12	13	11
HOM000310	19	15	12	7	11	23	9	20	12	11	17	16	8	17	10	7	22	9	6
HOM000312	12	11	6	11	15	30	11	34	17	16	10	15	13	8	15	12	8	8	5
HOM000314	5	12	11	9	11	25	19	36	14	6	11	16	9	14	9	13	17	16	13
HOM000315	13	13	9	11	9	23	12	17	14	11	12	21	13	9	15	10	11	9	8
HOM000318	12	14	13	10	8	18	11	30	16	11	18	17	12	15	10	9	15	8	6
HOM000320	8	8	11	12	10	26	15	38	12	13	10	15	10	11	13	22	12	7	6
HOM000322	24	21	13	17	11	21	17	13	13	7	12	13	10	14	18	7	16	10	9
HOM000326	7	8	9	11	8	15	17	33	11	18	10	16	21	11	17	20	10	8	7
HOM000328	15	13	9	11	7	24	11	28	13	9	9	13	7	12	13	8	13	8	4
HOM000329	17	14	12	10	11	21	9	18	17	6	14	19	11	13	12	18	15	12	8
HOM000330	17	15	11	8	9	28	17	21	12	10	13	18	11	12	10	7	17	12	9
HOM000332	22	17	12	8	7	34	10	21	17	8	14	18	10	12	11	4	20	7	6
HOM000335	15	14	11	15	9	27	12	24	19	10	10	18	12	16	13	6	17	10	6
HOM000336	10	11	9	11	11	20	19	27	12	9	14	13	7	13	8	10	23	12	9
HOM000338	9	9	12	10	8	32	5	17	13	9	12	12	11	13	11	23	15	10	8
HOM000340	15	15	13	10	9	22	9	16	15	10	13	15	9	13	12	17	17	7	4
HOM000342	10	10	9	8	30	20	9	25	14	10	12	18	14	8	10	12	13	11	9
HOM000343	15	14	10	6	9	29	16	17	13	11	11	13	7	9	7	7	21	6	5
HOM000344	9	9	13	9	12	24	9	22	12	9	15	18	9	13	9	13	16	9	7
HOM000346	10	8	8	6	11	23	15	30	20	14	15	22	10	7	10	21	7	6	5
HOM000347	11	9	12	10	7	26	13	21	14	11	12	21	10	14	10	8	23	11	10
HOM000348	16	11	14	7	9	14	10	34	11	9	16	16	9	14	9	9	14	4	2
HOM000351	11	11	16	9	10	25	12	15	15	9	15	11	11	17	8	10	18	7	6
HOM000355	13	12	10	10	12	31	11	18	16	9	12	17	12	11	10	15	9	12	9
HOM000356	13	12	12	8	6	21	7	23	19	10	15	20	11	16	11	10	21	7	6
HOM000357	14	13	14	8	10	29	9	20	12	15	13	16	9	15	9	13	15	14	9
HOM000362	17	9	6	10	9	18	17	27	14	7	6	19	11	3	12	13	8	6	4
HOM000364	9	8	13	6	11	9	10	13	10	9	11	14	6	11	8	7	16	7	5
HOM000366	11	13	11	8	9	23	5	28	15	9	15	11	9	13	13	10	22	11	10
HOM000370	10	11	10	13	12	21	9	34	11	14	9	16	9	9	9	14	13	11	10
HOM000371	18	18	3	10	12	25	10	27	23	10	9	24	14	7	17	5	5	11	8
HOM000374	12	10	13	10	9	31	9	23	16	12	13	18	10	10	10	7	16	8	7
HOM000377	9	9	11	9	8	25	5	38	13	9	11	20	9	12	7	15	18	7	6
HOM000378	19	13	9	10	11	15	11	20	11	13	10	15	9	11	14	12	11	6	4
HOM000379	14	12	10	4	8	12	7	35	10	13	13	8	6	13	9	11	12	7	6
HOM000382	10	5	8	5	7	10	11	19	5	4	6	9	13	5	8	10	7	8	6
HOM000383	11	9	7	14	10	16	17	36	12	13	10	15	10	9	10	15	6	7	6
HOM000387	11	11	6	11	14	12	7	24	11	8	12	13	9	8	20	15	8	7	5
HOM000389	1	8	22	6	9	9	2	16	5	10	26	4	13	25	6	7	24	10	8
HOM000391	9	7	12	10	11	21	17	15	12	27	8	12	8	11	10	10	9	9	8
HOM000392	13	13	10	8	9	20	8	26	16	8	12	16	7	10	15	9	14	13	9
HOM000394	13	10	10	5	8	25	16	17	16	11	15	17	6	11	9	8	20	5	4
HOM000396	15	13	8	7	9	20	15	42	16	6	8	13	6	6	7	9	12	14	6
HOM000398	9	11	8	5	7	23	7	24	17	10	10	16	11	9	11	8	16	12	11
HOM000400	3	3	1	1	1	2	7	2	1	93	2	24	1	1	78	2	2	2	1
HOM000401	11	9	20	8	7	15	11	18	12	9	0	17	10	24	5	11	20	7	5
HOM000404	10	10	8	11	8	20	15	25	13	18	6	21	10	6	10	11	12	10	8
HOM000405	13	12	7	8	11	27	9	20	19	8	13	15	10	12	9	8	18	8	6
HOM000406	6	7	21	4	9	5	2	12	4	7	26	9	4	33	7	4	34	10	6
HOM000408	13	11	8	8	7	29	8	15	15	14	8	21	10	7	8	9	9	8	7
HOM000410	4	6	13	3	10	12	10	43	6	9	11	11	10	15	9	11	7	3	2
HOM000411	11	8	9	7	10	16	9	28	12	5	7	13	9	8	8	7	13	10	7
HOM000412	8	9	12	10	10	22	7	17	17	9	12	17	13	9	10	10	18	12	5
HOM000414	10	10	11	6	8	21	7	15	12	11	14	11	6	9	10	12	16	11	7
HOM000416	11	12	11	6	9	19	10	19	13	11	10	15	8	22	8	8	17	13	10
HOM000418	12	12	10	10	9	25	13	15	10	6	10	12	7	6	7	9	19	6	4
HOM000421	8	8	13	5	6	22	8	19	9	5	11	14	6	17	7	8	24	8	5
HOM000423	11	11	9	7	10	21	7	26	11	7	12	13	8	11	9	7	16	9	7
HOM000424	11	11	8	8	7	22	11	29	13	3	9	17	9	9	9	10	14	6	3
HOM000427	7	7	4	10	12	13	11	15	8	5	4	9	6	7	9	6	4	6	5
HOM000428	19	14	9	5	11	23	9	17	13	8	13	14	7	8	9	8	13	10	9
HOM000429	11	11	8	8	11	21	11	21	11	6	7	16	7	9	8	8	8	9	6
HOM000434	12	11	13	6	13	20	6	15	10	7	14	11	7	9	10	17	13	13	9
HOM000435	9	9	9	6	8	20	8	24	16	16	12	15	9	7	10	9	14	12	8
HOM000436	15	12	12	7	8	22	9	27	12	10	10	11	6	12	7	7	13	12	11
HOM000437	7	7	16	7	9	12	4	21	7	4	8	16	7	5	12	10	13	8	6
HOM000438	15	15	13	7	7	28	11	13	10	6	15	11	6	11	8	7	15	11	10
HOM000443	18	15	6	8	8	13	13	50	10	5	5	14	8	8	7	7	8	8	5
HOM000444	11	11	10	7	8	15	13	23	12	9	12	14	8	11	7	10	19	7	4
HOM000445	8	8	13	7	9	23	16	9	9	13	11	8	6	14	11	8	11	3	2
HOM000447	14	13	12	7	9	13	5	21	12	5	15	11	7	14	8	6	19	7	3
HOM000448	9	9	9	8	7	26	11	20	12	12	10	13	6	9	7	7	14	5	3
HOM000452	6	10	7	7	12	13	12	14	10	10	9	12	7	8	8	12	8	11	10
HOM000454	9	8	15	6	8	23	5	14	9	12	16	10	6	13	7	5	17	2	1
HOM000455	7	7	19	7	9	17	8	18	7	5	16	11	8	20	6	5	18	4	3
HOM000456	10	9	11	7	13	18	9	25	13	3	9	16	7	12	6	6	16	14	10
HOM000459	10	11	11	8	8	19	8	14	12	8	13	11	9	14	6	11	14	8	6
HOM000460	7	7	8	12	12	13	6	31	10	16	11	12	7	10	8	8	9	6	4
HOM000466	19	16	9	11	11	7	6	32	10	8	9	9	5	12	3	5	12	8	5
HOM000467	10	10	9	8	6	15	9	19	9	13	14	15	8	6	8	9	12	9	7
HOM000469	9	7	8	7	7	13	5	15	6	5	10	13	6	7	7	8	17	7	5
HOM000470	9	9	8	7	10	18	8	31	11	10	7	12	5	8	9	8	12	5	3
HOM000471	8	5	4	2	10	28	9	24	20	24	4	21	6	4	16	8	3	2	1
HOM000472	14	16	7	8	9	23	6	24	9	10	9	12	8	13	10	1	10	9	5
HOM000473	7	9	14	5	6	22	6	14	11	8	16	12	7	16	7	7	20	6	5
HOM000477	8	6	9	5	6	15	12	16	7	10	10	17	9	13	9	9	15	6	4
HOM000479	4	9	4	11	21	18	7	47	17	4	5	8	13	6	12	7	5	5	3
HOM000481	4	10	6	7	10	20	10	25	17	8	8	13	11	7	10	8	12	8	7
HOM000483	13	10	11	7	6	20	5	16	13	6	12	13	8	11	8	8	17	4	3
HOM000485	7	5	8	6	12	11	6	23	6	10	11	9	4	12	7	5	12	4	2
HOM000486	14	9	8	7	10	14	8	18	11	8	9	15	11	7	10	11	10	8	6
HOM000487	10	10	11	5	7	22	9	12	10	7	14	11	7	12	5	9	12	21	18
HOM000490	10	9	9	6	6	14	5	21	12	4	11	10	6	7	6	6	17	4	3
HOM000491	5	6	5	8	6	12	23	5	8	20	12	7	10	6	10	13	10	4	2
HOM000493	2	10	21	6	4	19	7	16	6	5	14	13	7	17	5	5	21	6	5
HOM000494	12	10	11	7	11	13	8	8	10	8	19	12	8	13	8	6	14	5	3
HOM000496	8	9	7	5	11	19	4	25	7	6	9	11	10	6	10	8	13	9	7
HOM000497	6	7	8	4	8	17	12	14	9	13	6	18	7	7	16	13	10	7	4
HOM000499	12	12	7	10	6	18	8	13	9	6	6	11	5	8	7	7	11	12	8
HOM000505	6	8	6	8	4	12	3	16	9	4	9	13	7	9	7	7	11	4	3
HOM000508	7	5	5	7	7	11	14	21	13	10	6	13	6	6	9	9	8	6	5
HOM000511	6	5	7	9	8	22	4	17	16	6	8	13	9	9	13	10	10	9	8
HOM000513	11	9	10	8	6	18	13	10	11	7	10	14	6	9	7	7	14	6	5
HOM000514	9	7	13	7	9	17	12	19	6	7	11	9	6	13	5	10	15	6	5
HOM000517	7	8	9	8	9	21	9	15	15	10	5	18	9	5	14	9	6	6	5
HOM000519	8	9	8	9	4	25	7	13	12	8	10	17	9	7	10	4	12	5	4
HOM000520	5	6	10	3	9	13	6	20	5	4	10	9	3	7	8	7	7	8	6
HOM000522	9	6	7	6	4	13	14	22	7	11	10	9	5	11	6	8	9	8	7
HOM000524	8	7	4	5	8	16	4	31	10	15	5	9	7	3	7	10	7	8	7
HOM000525	5	5	9	7	13	17	13	17	6	13	11	10	7	9	7	5	12	5	4
HOM000527	1	4	34	8	7	0	10	19	9	7	12	11	9	13	2	4	12	6	5
HOM000529	11	9	9	8	7	22	7	15	11	9	10	14	6	8	7	16	10	12	10
HOM000530	8	7	8	7	6	16	5	17	8	9	6	11	6	8	9	6	13	7	6
HOM000532	8	7	4	4	5	11	7	26	6	6	4	7	5	2	4	9	8	4	3
HOM000537	13	9	7	6	5	16	7	11	10	7	10	12	7	9	7	7	16	12	11
HOM000540	7	8	9	6	6	14	6	10	8	18	9	8	5	8	30	6	10	2	1
HOM000543	9	10	19	4	4	7	5	7	6	2	15	16	4	15	8	13	14	4	2
HOM000544	8	8	5	7	10	16	5	10	10	1	13	8	9	12	7	5	7	6	4
HOM000545	9	11	7	8	4	18	6	13	19	4	10	14	7	11	7	4	12	6	5
HOM000549	9	6	3	12	11	12	6	29	10	13	3	16	8	3	14	12	7	7	4
HOM000551	13	12	6	10	8	11	8	16	13	15	4	14	8	7	10	19	2	4	2
HOM000553	12	10	6	7	6	22	6	17	12	4	11	11	6	8	6	7	15	5	4
HOM000557	16	11	4	8	12	21	12	11	12	7	6	11	7	4	7	9	5	4	3
HOM000558	10	11	6	8	12	15	8	13	9	6	10	10	10	7	7	7	8	4	2
HOM000562	11	8	6	4	6	17	8	12	9	4	8	14	7	11	6	9	11	10	9
HOM000563	7	7	7	7	7	11	9	35	8	16	8	12	6	4	7	6	8	8	4
HOM000564	10	10	5	8	9	18	14	15	9	9	5	11	7	4	6	7	6	6	5
HOM000565	9	8	8	5	9	20	8	16	10	9	9	11	7	8	8	9	12	10	8
HOM000566	12	13	11	4	3	24	7	8	9	2	11	16	6	11	8	5	11	5	3
HOM000571	8	6	5	6	5	14	8	23	8	6	6	9	6	6	6	6	9	7	6
HOM000572	18	14	11	5	5	16	5	8	7	4	11	11	6	11	6	5	14	9	8
HOM000576	7	9	8	5	5	18	6	19	9	4	8	12	4	7	4	5	14	8	5
HOM000577	8	8	7	7	7	16	8	10	13	7	9	14	7	7	17	7	9	10	6
HOM000578	10	9	7	6	5	21	8	16	7	7	7	10	6	8	6	8	9	9	7
HOM000580	7	6	7	7	8	10	7	24	8	6	6	7	8	5	6	7	13	7	4
HOM000581	10	9	8	4	3	14	4	9	7	4	8	30	7	6	6	5	11	9	6
HOM000583	11	10	4	10	9	9	10	14	8	12	2	14	8	3	6	7	2	8	7
HOM000584	7	8	7	4	7	9	7	20	6	6	7	8	4	12	4	4	18	4	3
HOM000587	7	7	4	5	6	20	6	23	10	5	6	12	8	5	11	9	7	7	5
HOM000589	8	7	6	8	5	15	7	9	10	11	7	13	6	8	6	11	12	9	8
HOM000591	11	9	6	5	7	15	8	17	13	6	6	10	6	6	11	7	8	6	5
HOM000595	8	5	7	7	6	8	5	23	6	6	7	10	4	7	5	5	11	4	3
HOM000596	8	8	9	6	5	17	5	15	11	6	10	10	6	5	7	7	13	9	6
HOM000598	9	11	6	6	6	9	5	20	5	7	10	9	6	11	8	9	8	6	4
HOM000599	5	6	10	4	5	14	3	9	9	7	7	11	5	9	4	3	13	10	8
HOM000602	11	10	3	5	6	17	5	11	10	14	5	11	7	5	6	7	8	8	5
HOM000605	5	5	7	5	4	19	10	15	9	8	12	8	5	9	6	7	10	5	4
HOM000608	9	9	5	5	5	13	12	9	8	7	6	10	6	8	6	4	5	6	5
HOM000609	11	9	6	3	8	14	6	23	14	7	6	12	7	8	7	8	6	8	6
HOM000611	7	7	5	7	8	11	5	22	11	6	5	10	8	5	9	10	7	5	3
HOM000613	5	4	8	5	2	8	14	10	6	4	10	5	10	9	3	17	15	5	4
HOM000616	9	9	6	4	4	20	6	12	8	7	6	7	6	7	16	11	6	5	3
HOM000617	9	10	5	6	5	17	11	18	8	12	5	8	6	6	5	7	7	10	8
HOM000622	8	7	7	6	5	20	6	16	11	7	7	11	5	6	6	7	13	5	4
HOM000628	6	5	6	6	4	9	3	12	7	2	6	9	10	5	6	6	7	5	4
HOM000630	7	4	6	5	5	15	11	20	7	8	10	8	7	6	7	7	5	4	2
HOM000632	14	10	10	5	6	15	5	12	9	7	8	10	8	7	6	5	13	10	6
HOM000633	5	5	6	6	5	11	7	16	7	7	6	10	10	5	5	7	7	8	7
HOM000634	10	9	4	5	9	13	2	41	8	4	5	12	7	3	7	6	4	7	3
HOM000635	11	9	6	5	5	13	6	10	10	7	5	7	6	9	6	6	14	4	3
HOM000636	16	8	6	5	5	8	5	14	8	8	6	14	8	4	5	6	9	5	3
HOM000638	7	7	7	4	14	17	10	19	7	9	8	7	7	6	11	6	6	5	4
HOM000639	8	4	3	5	5	11	10	15	7	4	5	7	4	3	4	6	7	7	6
HOM000640	4	4	7	9	4	15	4	13	9	4	7	13	8	8	7	9	12	6	4
HOM000641	5	5	4	6	7	23	10	16	10	9	5	6	10	7	6	12	6	3	2
HOM000644	3	3	5	5	5	7	8	11	9	9	10	5	5	10	6	8	7	2	1
HOM000646	10	10	7	8	8	18	9	14	10	2	6	12	7	7	6	5	12	7	5
HOM000647	6	6	7	7	8	15	6	21	6	7	7	7	6	7	5	8	13	7	5
HOM000649	8	7	8	5	4	16	9	11	10	6	9	9	6	11	6	7	11	7	5
HOM000650	6	6	8	6	7	19	4	16	9	5	9	10	6	10	5	5	18	6	5
HOM000651	7	7	6	6	5	15	13	8	8	4	6	11	4	6	7	5	7	6	5
HOM000656	9	8	6	4	3	12	7	14	4	4	9	5	4	3	4	4	7	5	4
HOM000658	5	5	7	4	7	15	7	21	7	4	8	9	12	6	4	5	8	5	4
HOM000659	8	7	7	5	4	20	6	12	10	8	8	9	5	12	5	5	17	6	4
HOM000661	7	7	1	2	15	11	13	36	8	2	2	17	7	1	11	5	2	4	3
HOM000662	8	8	7	6	6	13	4	19	9	9	7	8	7	7	6	6	10	6	5
HOM000663	8	5	5	10	4	9	11	17	6	7	6	7	5	6	6	5	8	6	5
HOM000668	7	7	4	9	5	12	3	17	7	7	4	10	5	4	6	10	7	6	5
HOM000673	0	6	8	6	8	16	5	14	10	4	7	14	8	11	8	8	13	4	3
HOM000674	5	6	7	5	9	16	8	14	8	5	6	15	5	6	9	7	13	7	5
HOM000678	6	5	6	10	6	11	4	16	8	8	5	9	7	8	7	8	10	6	5
HOM000680	1	11	2	11	11	14	7	20	8	8	3	17	5	3	9	10	4	11	8
HOM000688	6	6	6	4	6	11	7	19	7	4	7	11	5	4	5	6	7	7	6
HOM000692	4	4	5	4	5	12	8	16	6	5	5	7	15	8	9	7	8	5	3
HOM000693	6	6	5	12	6	14	10	22	10	3	4	10	7	5	8	10	7	13	10
HOM000697	6	5	6	5	4	14	9	12	9	5	5	14	7	3	6	5	10	7	5
HOM000698	7	7	6	5	3	9	9	21	7	9	6	10	6	4	6	5	7	6	4
HOM000699	6	6	6	7	6	16	7	12	7	8	7	9	7	6	5	4	11	6	5
HOM000700	6	6	7	7	4	25	8	12	2	13	7	19	4	5	5	10	6	8	6
HOM000705	8	9	11	6	5	11	6	11	9	5	10	4	4	10	6	3	11	3	1
HOM000706	9	7	5	5	3	14	9	17	10	2	5	8	6	4	7	8	7	8	5
HOM000708	7	8	4	5	7	9	7	22	9	5	3	12	8	3	9	7	7	4	3
HOM000710	11	5	4	5	8	11	7	12	6	7	4	10	5	5	4	8	4	5	4
HOM000711	6	6	4	6	6	16	5	21	9	5	6	11	6	8	6	7	8	4	2
HOM000712	7	7	6	4	4	13	10	14	9	5	7	12	5	11	5	7	13	6	4
HOM000716	5	5	6	4	5	13	7	23	6	6	7	5	7	6	3	4	6	4	3
HOM000722	11	9	5	3	8	13	15	19	7	5	5	9	3	6	7	4	7	3	2
HOM000725	8	8	8	4	5	20	7	13	8	5	11	6	5	8	5	4	12	9	7
HOM000726	9	8	7	5	6	16	6	12	10	4	5	7	4	5	5	6	11	4	3
HOM000730	8	8	8	6	6	10	6	17	9	4	7	11	4	7	5	5	10	5	4
HOM000732	7	7	7	6	5	14	7	9	8	4	7	8	8	13	7	5	10	5	4
HOM000733	8	9	4	10	3	15	10	7	7	11	5	8	6	5	6	7	6	5	4
HOM000738	5	5	6	5	4	17	16	6	4	2	6	10	3	5	4	6	9	5	4
HOM000740	3	3	5	6	8	12	4	11	10	3	6	14	6	7	8	9	7	6	4
HOM000741	6	6	6	6	7	13	6	10	6	5	8	7	8	8	6	6	5	5	4
HOM000744	12	9	6	7	3	14	4	10	11	6	7	8	7	6	6	9	9	5	3
HOM000746	1	2	6	4	7	7	3	17	6	5	9	7	9	7	9	9	10	3	1
HOM000748	5	5	5	6	5	14	4	7	8	7	7	8	5	6	5	6	7	9	3
HOM000749	7	7	7	3	5	12	8	12	7	5	6	8	5	6	6	6	11	6	5
HOM000751	6	8	9	5	3	9	3	10	9	6	9	9	6	8	7	5	11	5	4
HOM000754	7	7	6	5	7	14	9	17	7	4	7	8	6	6	6	7	7	6	5
HOM000758	10	10	6	3	5	13	6	14	8	5	5	11	5	8	5	7	7	8	5
HOM000762	7	7	4	4	4	18	3	13	9	15	6	5	5	4	4	4	17	5	4
HOM000766	5	6	4	5	4	14	3	13	9	8	6	11	7	5	5	5	10	5	2
HOM000767	7	5	6	4	6	16	10	10	10	4	6	8	7	6	9	7	5	4	3
HOM000768	6	6	5	5	3	13	6	16	6	4	7	5	4	5	5	5	6	4	3
HOM000771	8	7	5	5	6	12	6	17	11	5	6	11	5	5	6	6	10	7	5
HOM000772	10	8	7	4	4	17	7	7	7	9	8	8	3	7	4	6	8	4	3
HOM000774	9	6	4	4	4	11	3	21	10	2	4	11	6	5	6	6	9	5	3
HOM000778	5	5	5	6	6	15	7	12	9	6	6	11	6	4	6	7	11	4	3
HOM000779	12	16	10	6	1	9	3	9	11	3	13	4	4	13	3	2	9	4	3
HOM000780	6	6	6	4	6	12	4	17	2	16	9	8	4	6	3	3	9	6	4
HOM000783	3	3	6	6	13	6	6	16	4	5	4	13	4	11	6	6	6	7	6
HOM000785	11	8	5	3	4	9	3	11	6	6	4	8	6	4	7	6	11	8	7
HOM000787	10	9	6	4	5	9	4	13	9	4	6	8	5	6	7	8	9	6	5
HOM000792	5	4	4	6	4	8	16	16	5	5	4	9	5	8	4	11	8	8	7
HOM000793	12	10	4	4	7	13	5	14	9	5	5	9	5	6	5	1	7	3	2
HOM000794	4	4	6	7	5	9	8	18	7	5	7	10	5	8	11	5	7	4	3
HOM000795	5	5	7	7	6	11	4	17	8	4	6	8	5	8	6	8	11	3	2
HOM000800	6	5	4	6	8	10	6	13	7	5	4	6	6	8	5	9	8	4	2
HOM000802	6	6	5	6	4	10	2	18	10	4	5	13	5	7	5	6	8	8	6
HOM000805	5	5	4	2	4	12	15	16	8	5	10	8	4	5	4	5	10	6	5
HOM000807	8	8	5	6	8	18	3	14	10	7	4	11	6	4	6	5	5	9	7
HOM000808	8	6	5	6	5	15	5	15	6	4	5	10	5	3	6	8	7	5	4
HOM000809	8	8	3	5	6	14	6	15	10	6	3	8	5	3	5	4	5	6	5
HOM000811	4	5	7	5	8	8	9	15	5	5	9	5	4	7	6	5	9	6	4
HOM000812	7	8	7	5	7	6	5	8	6	3	4	9	6	5	7	6	5	4	2
HOM000813	4	4	7	4	4	11	6	11	6	4	7	10	5	11	4	4	11	6	5
HOM000815	14	6	7	6	3	10	3	8	9	4	11	5	4	6	5	4	7	5	4
HOM000818	7	8	3	6	4	10	1	19	11	2	4	8	5	4	6	7	7	5	3
HOM000819	1	1	1	5	31	7	3	18	9	30	0	6	7	1	6	6	1	3	2
HOM000821	6	5	8	3	7	13	3	8	10	3	8	10	5	12	7	3	7	4	2
HOM000822	4	5	6	5	6	11	6	14	10	3	5	8	5	5	11	4	10	9	8
HOM000828	5	5	10	3	5	10	8	6	4	7	10	5	4	8	5	8	7	3	2
HOM000831	7	8	5	5	5	10	6	9	8	5	6	9	5	6	5	10	7	7	5
HOM000833	8	8	5	3	12	11	7	11	5	4	4	8	3	4	7	6	7	8	7
HOM000836	7	6	5	4	10	10	10	5	6	5	5	8	5	2	4	5	5	8	5
HOM000838	5	5	4	5	5	10	5	21	6	3	6	8	5	5	5	6	5	5	2
HOM000840	3	3	5	11	9	16	2	12	7	5	4	5	5	6	5	3	6	4	3
HOM000841	7	8	7	4	4	16	7	12	8	5	6	8	5	5	5	5	8	8	5
HOM000847	4	2	9	4	7	9	5	18	4	4	6	4	4	7	2	7	5	3	2
HOM000848	6	6	7	5	4	14	6	5	5	3	7	7	5	6	4	4	9	6	3
HOM000850	2	3	5	4	5	9	6	10	9	5	5	6	5	5	10	4	8	5	4
HOM000852	4	3	4	5	3	7	9	21	6	4	5	5	8	3	6	3	6	4	3
HOM000853	4	5	7	5	5	8	3	15	8	4	7	7	4	6	7	4	15	8	4
HOM000854	6	6	6	3	4	12	3	16	8	6	5	10	4	5	4	4	8	6	5
HOM000859	6	5	5	3	3	9	4	8	5	4	5	5	4	5	4	4	14	4	3
HOM000860	10	9	8	2	4	11	5	4	5	6	10	4	2	9	6	5	8	4	3
HOM000861	5	5	6	5	5	14	6	11	9	5	5	10	7	5	6	6	6	5	4
HOM000880	7	5	4	4	3	6	13	18	6	5	4	6	4	7	3	3	4	4	3
HOM000882	5	5	8	4	4	11	3	9	7	4	7	10	4	9	8	4	13	6	5
HOM000884	4	4	5	7	5	18	5	10	6	5	5	12	5	4	5	4	5	7	5
HOM000885	7	6	7	3	7	9	3	15	6	4	5	6	4	5	4	6	7	4	3
HOM000886	7	5	4	5	4	21	7	10	7	4	6	7	4	3	6	7	8	5	3
HOM000891	5	5	5	8	7	10	4	8	8	4	6	6	6	4	9	5	5	4	3
HOM000895	7	6	5	4	4	13	3	4	8	5	5	7	4	4	19	4	6	5	4
HOM000896	5	5	4	5	6	8	5	15	6	3	6	8	5	8	5	4	5	3	2
HOM000897	4	4	5	9	4	11	4	11	6	5	6	11	4	5	5	8	8	5	4
HOM000898	6	5	6	3	5	8	4	2	8	4	6	7	7	7	5	5	10	4	3
HOM000902	5	5	5	4	5	10	6	10	7	7	7	8	4	6	4	5	7	11	7
HOM000906	5	4	7	3	4	10	3	6	7	4	9	7	4	5	5	6	10	4	2
HOM000908	9	5	7	8	5	9	1	6	7	2	6	8	5	5	5	6	8	5	4
HOM000917	11	8	4	5	4	10	5	23	7	5	6	8	3	4	4	2	5	6	4
HOM000919	8	5	2	3	5	7	5	9	6	4	3	10	5	3	7	2	3	3	2
HOM000920	1	5	12	7	3	14	4	9	7	4	4	8	4	7	4	5	12	6	4
HOM000922	9	9	6	4	4	15	8	10	7	7	5	7	5	5	4	3	7	3	1
HOM000924	3	3	6	6	5	11	8	15	8	3	6	9	3	6	4	3	10	5	4
HOM000929	7	4	4	4	9	7	4	24	4	7	5	7	2	5	3	4	5	3	1
HOM000932	4	4	3	4	6	12	5	19	6	4	5	8	5	2	4	5	5	15	11
HOM000934	3	3	1	2	3	7	2	13	5	4	3	6	2	5	2	3	42	4	2
HOM000935	9	6	3	7	6	8	3	15	4	4	5	7	5	4	3	5	6	4	3
HOM000940	6	6	2	3	3	13	7	5	7	11	7	9	4	4	8	3	4	3	2
HOM000953	7	6	5	5	5	10	3	13	10	2	5	9	5	5	5	4	9	6	4
HOM000958	3	5	5	6	7	10	7	8	8	7	4	8	8	4	5	5	7	4	3
HOM000961	3	2	6	5	2	4	11	2	6	23	9	6	7	4	3	7	3	2	1
HOM000962	6	6	7	3	4	12	2	9	7	4	7	7	4	5	4	8	8	5	4
HOM000965	5	5	4	5	2	10	3	12	6	6	4	6	4	4	4	5	11	6	4
HOM000971	9	6	5	4	4	10	6	10	7	3	4	10	4	5	4	5	12	6	4
HOM000972	5	5	3	4	4	7	3	13	4	4	4	6	2	4	4	4	3	3	2
HOM000977	4	4	5	6	7	11	9	12	5	4	6	5	4	7	5	4	7	4	3
HOM000979	5	6	4	4	3	9	6	7	4	2	4	5	4	4	5	4	4	4	3
HOM000982	5	3	4	4	16	4	4	14	3	6	5	3	4	3	3	3	3	3	2
HOM000983	6	5	6	4	4	14	7	11	4	4	6	4	3	6	4	4	10	4	3
HOM000985	5	5	4	4	5	9	6	13	7	8	4	7	6	5	4	4	7	7	6
HOM000988	5	3	5	3	5	11	11	13	5	6	5	6	3	4	4	4	5	5	4
HOM000991	6	5	3	3	3	7	6	21	4	2	5	6	2	3	3	4	5	3	2
HOM000994	7	6	5	3	6	8	3	13	4	8	4	5	3	5	4	4	5	6	5
HOM000995	11	10	4	4	3	7	3	15	7	3	6	7	4	6	4	2	8	2	1
HOM000999	5	6	3	5	9	8	1	15	4	0	3	6	6	2	7	8	5	8	7
HOM001004	4	5	6	3	3	7	7	12	4	4	4	3	4	4	5	4	4	4	3
HOM001005	5	5	4	4	3	15	7	6	6	12	3	11	6	2	5	5	5	3	2
HOM001006	6	4	7	3	3	7	5	5	6	1	7	7	4	9	3	3	12	3	2
HOM001008	6	6	3	4	5	10	3	19	8	4	4	8	3	3	4	5	7	3	1
HOM001012	5	5	5	4	4	14	6	11	6	5	4	6	4	7	5	4	7	5	3
HOM001017	3	3	3	4	6	8	11	10	6	9	4	5	6	4	8	5	6	3	2
HOM001018	5	3	6	8	3	9	6	7	8	7	4	10	4	4	6	6	3	3	2
HOM001023	5	5	5	3	5	8	3	11	7	4	5	7	4	4	4	4	5	4	2
HOM001024	7	6	4	5	5	8	7	9	6	7	3	6	4	4	4	4	6	4	3
HOM001025	9	5	5	4	4	8	5	9	5	3	6	5	3	5	3	4	6	3	2
HOM001027	2	6	5	1	4	7	4	7	7	5	10	10	4	5	11	3	5	4	2
HOM001030	4	4	4	3	4	8	3	11	6	4	6	10	4	4	4	4	4	4	3
HOM001032	1	3	2	12	5	8	4	10	4	10	3	7	4	6	2	5	5	5	4
HOM001034	7	7	4	2	3	10	5	13	3	5	6	4	2	4	2	3	4	3	2
HOM001036	4	4	7	4	4	9	3	10	8	1	6	8	5	6	3	4	9	6	5
HOM001042	7	4	4	4	4	12	3	4	7	3	5	8	4	11	2	3	7	2	1
HOM001043	5	4	4	4	5	6	6	7	5	3	3	6	5	6	3	12	9	7	4
HOM001048	5	5	5	4	6	6	5	5	5	3	6	7	4	4	3	4	8	5	2
HOM001050	7	5	5	2	3	6	5	12	4	3	5	7	2	6	4	4	14	4	3
HOM001056	6	4	5	4	6	13	5	4	6	4	6	7	3	6	4	4	9	4	3
HOM001058	3	4	5	3	5	5	3	16	4	8	5	5	3	6	6	4	8	2	1
HOM001059	6	5	3	4	5	8	4	16	4	5	3	7	4	2	5	2	2	4	3
HOM001060	5	5	6	4	5	8	5	7	5	3	6	7	5	6	4	3	8	4	3
HOM001063	4	3	4	5	5	10	3	8	5	8	5	8	3	4	4	4	7	5	4
HOM001066	5	5	3	4	5	14	7	9	6	2	3	5	4	3	4	5	4	8	6
HOM001068	6	6	5	4	6	8	3	11	7	4	5	7	4	5	5	4	7	4	2
HOM001070	2	2	3	3	8	7	1	27	5	11	3	6	3	4	4	3	8	8	4
HOM001071	6	5	3	4	5	10	8	10	5	6	5	7	3	3	4	4	6	6	4
HOM001072	6	5	5	3	5	11	5	4	7	2	6	7	3	5	4	4	11	8	4
HOM001075	6	6	4	4	4	8	4	10	6	2	5	7	5	5	5	7	5	6	5
HOM001076	4	3	6	3	3	13	7	9	8	12	5	6	4	5	4	2	5	3	2
HOM001079	3	3	5	5	4	13	10	11	5	4	5	6	4	4	6	5	4	4	2
HOM001080	6	5	5	2	3	5	1	11	4	2	7	9	3	5	3	3	10	3	1
HOM001082	3	3	4	3	5	9	6	11	4	2	4	5	4	2	3	3	7	4	3
HOM001084	5	4	3	3	5	8	3	14	4	5	3	5	3	3	3	4	5	3	2
HOM001088	4	3	4	3	5	10	4	11	5	4	4	5	4	4	3	3	14	5	3
HOM001090	4	4	4	4	4	11	4	8	5	7	5	10	6	7	5	1	6	3	2
HOM001092	5	5	3	6	3	9	4	13	7	3	4	8	3	2	3	4	3	3	2
HOM001095	4	4	2	2	4	8	4	11	5	3	2	7	3	3	7	3	16	10	6
HOM001096	7	6	4	3	7	7	5	16	7	2	6	6	4	5	3	3	6	2	1
HOM001097	7	6	6	5	3	11	4	7	6	3	6	6	3	4	3	3	6	5	4
HOM001101	7	5	3	3	4	11	5	11	7	4	3	5	4	5	4	4	8	4	3
HOM001105	4	5	3	4	3	12	4	14	7	2	4	4	4	3	4	4	9	5	2
HOM001106	4	4	4	5	3	11	4	18	5	4	4	5	5	4	5	5	4	2	1
HOM001107	4	4	4	5	4	8	1	10	8	4	4	9	5	3	5	5	7	6	5
HOM001114	4	3	5	5	5	6	5	9	6	6	5	6	5	4	4	4	7	5	3
HOM001117	4	4	3	3	3	6	1	28	3	5	3	5	4	3	3	3	5	4	3
HOM001120	4	4	5	3	3	8	5	6	6	4	6	7	3	8	3	3	9	2	1
HOM001121	2	2	3	4	5	7	3	12	5	7	6	8	4	2	5	4	8	4	3
HOM001122	8	7	3	3	2	10	4	7	6	4	4	14	5	5	5	5	4	5	4
HOM001126	6	5	8	5	4	6	3	7	5	1	5	6	3	4	3	3	8	7	6
HOM001127	4	3	5	3	5	10	3	10	5	2	5	5	3	4	4	3	6	5	2
HOM001132	7	6	5	2	2	12	1	20	5	0	4	8	4	5	3	3	3	4	2
HOM001134	6	5	4	3	6	9	4	8	9	3	5	10	4	3	4	5	6	5	3
HOM001136	4	4	5	7	3	7	3	9	6	2	5	8	4	4	4	4	8	5	3
HOM001137	4	4	4	5	4	7	3	6	6	2	6	6	5	5	4	4	5	3	2
HOM001139	5	5	4	4	7	11	5	7	7	3	4	7	3	5	5	5	4	4	3
HOM001140	3	3	3	3	4	5	5	10	5	3	5	5	4	4	3	3	6	5	2
HOM001142	4	6	5	4	4	10	0	10	5	5	6	7	5	4	3	4	5	2	1
HOM001143	5	5	4	2	7	8	4	14	7	3	3	4	4	3	4	4	7	11	9
HOM001144	4	4	4	4	6	6	2	14	7	4	4	7	3	5	4	6	5	3	2
HOM001145	4	3	6	6	3	7	7	4	6	1	6	6	6	3	3	5	5	5	2
HOM001153	3	3	4	3	4	9	2	11	8	6	4	8	4	4	5	4	7	5	3
HOM001154	6	4	2	3	2	6	10	10	4	6	3	6	5	4	5	3	9	4	2
HOM001157	6	6	3	4	3	9	2	13	6	5	3	6	3	4	3	3	5	4	2
HOM001164	7	5	3	3	4	6	5	10	6	2	4	4	3	3	5	4	6	4	3
HOM001169	6	6	3	4	3	9	7	9	4	4	3	5	3	2	3	3	5	5	3
HOM001171	2	3	3	4	2	7	6	13	4	3	4	7	3	3	4	3	3	3	2
HOM001172	5	5	5	3	4	7	4	11	4	3	5	5	3	5	3	3	5	2	1
HOM001174	4	3	3	5	5	6	3	22	4	3	4	5	3	1	3	3	6	8	5
HOM001177	3	3	3	2	4	10	2	6	5	17	3	7	3	3	2	2	5	4	2
HOM001185	7	5	4	6	5	9	4	12	6	1	4	4	3	3	4	3	5	4	3
HOM001187	3	3	3	3	5	11	6	4	4	17	3	3	5	3	7	5	5	4	3
HOM001188	2	3	4	2	2	3	2	4	5	5	4	4	2	4	2	2	3	5	4
HOM001191	8	7	5	5	3	8	3	9	4	3	6	5	2	6	2	2	9	4	3
HOM001192	3	3	4	4	4	10	4	8	5	4	4	5	3	6	3	4	10	4	3
HOM001199	2	2	1	3	2	9	4	8	5	4	9	10	4	6	4	1	12	2	1
HOM001205	5	5	4	3	4	8	3	6	8	2	5	7	4	5	4	4	9	4	3
HOM001209	5	4	6	3	3	9	6	8	4	2	4	7	3	5	3	4	4	4	3
HOM001212	6	5	5	3	3	10	3	6	6	4	6	5	3	5	3	3	8	5	3
HOM001223	9	9	3	2	2	5	3	7	3	4	3	5	3	3	3	3	3	4	2
HOM001224	5	6	4	2	4	10	6	3	6	6	3	7	5	3	5	5	5	5	3
HOM001227	4	4	4	2	2	6	4	8	3	2	4	4	5	3	2	5	6	5	3
HOM001230	5	5	3	4	4	10	4	6	5	5	4	5	3	5	5	1	7	4	3
HOM001234	3	3	3	3	3	6	3	9	4	2	3	4	3	4	3	12	8	3	2
HOM001235	3	3	4	4	7	8	2	9	5	2	4	6	3	2	6	4	7	7	4
HOM001240	3	3	3	7	5	8	8	8	5	1	1	8	4	4	4	4	5	5	4
HOM001241	3	3	3	2	3	12	9	11	6	3	3	4	3	3	6	3	5	2	1
HOM001243	6	4	1	3	2	11	7	15	4	4	2	5	2	1	3	5	1	4	3
HOM001258	4	4	4	4	3	7	3	8	5	3	4	7	5	4	3	5	6	3	2
HOM001259	2	2	2	4	3	16	4	6	9	5	4	8	5	1	4	9	4	2	1
HOM001261	1	1	2	1	2	33	12	7	1	11	1	6	2	1	1	1	1	3	2
HOM001263	3	3	2	3	2	9	4	15	5	3	4	4	4	3	4	4	5	3	2
HOM001264	3	3	3	7	3	8	4	11	5	5	4	4	3	3	3	3	5	4	3
HOM001266	2	2	16	2	1	5	1	4	2	3	9	3	2	14	3	2	7	3	2
HOM001267	4	4	5	3	3	6	6	7	6	4	5	4	3	4	3	4	6	3	2
HOM001272	3	4	10	2	2	5	2	7	2	0	11	4	2	9	2	4	11	5	4
HOM001274	2	2	3	5	4	6	5	9	3	3	3	4	3	3	6	4	3	3	2
HOM001275	5	5	5	3	3	7	3	11	4	6	5	4	2	4	4	5	3	2	1
HOM001280	7	9	0	1	14	2	1	32	1	1	0	3	1	0	3	1	0	3	2
HOM001281	4	3	4	1	2	4	1	7	4	0	4	7	3	3	4	3	8	4	2
HOM001282	5	5	5	3	4	6	4	9	4	0	5	3	4	5	4	3	4	4	3
HOM001289	2	2	4	2	5	7	3	7	5	7	5	3	6	3	1	11	4	3	2
HOM001293	5	6	4	4	8	9	5	3	4	4	3	6	5	3	8	3	3	2	1
HOM001295	5	3	4	2	2	9	4	11	3	3	3	4	3	3	6	2	4	3	2
HOM001298	5	5	3	3	2	7	3	6	5	2	4	7	4	4	3	2	4	4	2
HOM001299	5	4	6	2	2	4	6	5	4	2	6	4	2	2	2	2	9	5	3
HOM001300	3	2	2	2	3	6	4	11	4	4	4	4	5	2	7	3	5	5	4
HOM001302	4	3	5	2	4	10	5	6	4	9	4	4	3	3	3	3	6	5	4
HOM001307	5	5	3	3	3	6	3	13	5	3	4	7	2	2	4	3	5	2	1
HOM001314	5	3	6	3	4	6	3	10	2	5	4	5	2	3	3	3	6	3	2
HOM001316	5	5	3	3	4	8	4	6	5	3	2	6	4	4	4	3	5	2	1
HOM001336	7	7	4	5	7	5	3	6	4	3	3	4	5	5	5	2	5	3	1
HOM001340	3	3	3	5	2	10	4	5	5	2	4	5	4	2	4	8	3	4	2
HOM001342	7	7	3	3	5	8	4	6	6	2	4	5	3	3	3	3	4	5	4
HOM001346	7	6	5	2	3	5	3	7	3	4	4	4	3	4	4	2	6	3	2
HOM001350	2	3	3	5	2	8	8	8	6	4	3	7	3	2	7	3	4	2	1
HOM001354	5	4	4	4	4	6	4	7	5	6	4	4	3	4	3	4	6	4	3
HOM001356	2	2	2	5	2	4	5	3	3	7	2	3	2	2	2	2	2	2	1
HOM001357	2	4	2	2	4	6	2	6	2	2	5	4	2	5	3	2	4	3	1
HOM001358	5	4	1	3	5	11	5	12	7	1	1	11	4	1	5	3	2	2	1
HOM001364	5	4	3	3	3	6	5	8	6	3	3	6	3	3	3	3	5	5	4
HOM001366	5	3	3	3	5	6	0	10	6	2	2	8	4	2	4	4	7	4	3
HOM001370	6	4	0	2	1	6	13	4	7	20	0	11	1	0	3	7	0	4	1
HOM001373	7	6	4	2	2	6	8	8	2	3	4	4	2	8	3	2	4	3	2
HOM001375	7	6	2	4	5	8	3	9	5	4	2	5	4	2	5	3	2	3	2
HOM001377	2	2	1	1	4	8	7	16	2	5	3	3	1	1	3	3	8	4	1
HOM001382	3	3	2	5	3	8	5	11	4	4	2	5	4	2	5	4	4	7	5
HOM001386	2	2	2	3	8	9	2	9	3	4	5	4	2	3	2	3	8	4	2
HOM001387	6	6	2	5	4	6	7	7	6	6	2	10	3	1	5	2	2	2	1
HOM001389	4	4	5	4	3	10	3	1	5	4	6	7	2	4	4	5	5	3	1
HOM001390	4	4	4	4	3	10	3	7	3	2	5	4	4	7	4	4	5	5	4
HOM001398	3	3	5	4	5	6	2	13	4	2	5	4	2	4	2	4	6	3	1
HOM001400	4	4	4	4	2	5	5	8	5	2	4	3	3	4	4	4	4	2	1
HOM001401	4	3	4	4	2	6	0	7	4	4	3	3	3	2	5	3	8	2	1
HOM001402	3	3	6	3	4	6	3	5	3	0	5	6	3	6	3	3	6	5	2
HOM001413	2	2	6	2	1	4	2	5	2	1	10	3	2	9	2	2	5	2	1
HOM001418	2	2	3	2	14	5	3	10	4	3	2	6	2	2	2	5	2	8	7
HOM001420	5	5	3	4	6	12	5	5	6	3	1	10	3	1	4	3	2	3	2
HOM001422	4	4	3	4	3	8	3	7	6	2	4	4	3	1	3	4	5	3	2
HOM001424	8	10	1	1	9	8	2	11	4	4	2	5	3	1	2	1	3	4	3
HOM001425	3	3	5	3	3	9	1	7	8	4	4	6	4	4	4	3	6	3	2
HOM001426	3	3	7	2	2	2	2	7	8	3	6	5	8	6	3	1	3	3	2
HOM001428	4	4	5	4	4	7	5	6	4	1	3	8	5	3	4	3	5	3	2
HOM001429	3	3	3	3	3	7	4	17	2	3	2	3	2	2	2	2	6	3	2
HOM001432	6	5	3	1	3	6	5	9	4	3	2	5	3	2	3	2	4	2	1
HOM001433	5	4	3	4	3	5	2	9	3	3	4	4	3	4	4	4	3	3	2
HOM001438	2	2	4	2	2	6	5	4	4	2	5	3	3	4	4	3	6	2	1
HOM001443	3	3	3	3	3	10	3	7	7	2	3	6	4	2	3	3	5	4	3
HOM001446	3	2	6	2	3	8	1	9	5	4	6	3	3	6	3	4	7	2	1
HOM001449	3	3	2	3	2	5	2	9	5	2	4	3	4	1	4	3	2	3	2
HOM001452	6	6	2	2	3	6	5	9	3	7	3	6	3	3	3	2	6	4	3
HOM001456	4	4	3	2	2	6	3	11	4	2	3	2	2	2	2	3	6	4	3
HOM001457	6	6	4	2	2	9	6	6	6	1	4	4	2	9	2	2	5	6	4
HOM001458	7	4	3	4	3	9	4	0	6	7	3	8	3	4	3	3	3	3	2
HOM001473	3	3	5	2	2	4	1	8	6	8	5	4	3	3	2	3	4	3	2
HOM001477	4	4	3	3	4	9	5	5	4	2	3	5	3	2	5	3	5	2	1
HOM001487	5	4	5	4	4	10	3	6	4	2	3	5	4	6	4	3	4	4	3
HOM001489	3	3	2	3	3	8	6	8	4	3	5	4	3	1	3	3	3	5	3
HOM001493	2	2	3	2	3	8	4	3	4	3	3	4	2	4	4	3	6	4	3
HOM001494	3	3	2	3	7	5	3	6	4	1	2	8	4	3	5	2	3	4	3
HOM001503	4	4	4	3	4	6	3	8	4	2	2	5	5	3	0	2	2	6	3
HOM001511	4	4	3	4	3	6	3	4	5	3	3	5	3	3	4	2	4	2	1
HOM001517	4	3	5	3	4	8	4	7	3	7	1	6	4	4	2	3	4	3	2
HOM001521	6	6	3	2	6	8	1	3	4	2	3	4	5	2	4	3	5	4	2
HOM001529	6	5	2	2	2	7	4	22	3	0	2	4	2	6	2	2	4	2	1
HOM001530	4	3	3	3	6	4	1	12	5	2	4	4	3	3	3	2	7	3	2
HOM001540	3	3	3	2	5	7	2	13	5	4	3	6	2	3	4	3	3	2	1
HOM001544	4	4	2	2	2	8	4	6	3	3	2	3	3	3	3	2	4	2	1
HOM001545	3	2	3	3	2	7	4	5	5	1	4	4	5	3	3	5	4	3	2
HOM001546	3	3	3	3	2	4	1	8	5	6	4	4	2	1	3	3	6	4	2
HOM001553	4	4	5	3	4	6	4	4	4	3	4	4	4	4	3	3	5	5	3
HOM001559	3	3	2	3	2	7	4	7	7	5	2	6	3	3	3	3	3	4	3
HOM001561	1	2	1	1	51	4	2	2	2	2	1	2	1	1	1	0	1	2	1
HOM001562	5	5	3	3	2	10	2	2	6	2	4	7	3	3	4	3	4	5	4
HOM001566	3	3	4	2	2	7	3	14	3	2	4	3	3	2	2	2	3	3	2
HOM001571	2	3	2	2	3	5	4	10	6	3	4	7	3	3	3	3	4	3	2
HOM001573	3	3	3	4	6	6	3	5	4	2	3	5	3	3	3	3	5	3	2
HOM001577	3	3	3	3	3	3	1	7	3	2	3	4	4	2	3	3	3	3	2
HOM001587	8	6	3	2	3	8	4	7	4	2	2	5	2	2	3	3	2	3	2
HOM001588	3	2	2	4	2	6	2	7	4	3	2	5	3	2	3	3	3	3	2
HOM001594	3	3	3	3	3	4	3	9	5	1	4	5	3	4	4	3	4	3	2
HOM001595	3	3	3	2	1	4	1	5	4	5	3	4	3	3	3	3	5	3	2
HOM001598	2	2	7	3	3	7	4	10	3	3	3	3	2	3	2	2	3	3	2
HOM001605	3	3	2	2	2	7	2	5	4	4	2	5	3	5	3	4	4	2	1
HOM001606	7	5	2	3	2	7	5	7	3	2	2	6	2	2	4	2	5	3	2
HOM001609	7	4	3	5	4	6	2	7	4	3	3	7	4	3	3	3	2	7	6
HOM001612	3	3	2	3	2	7	2	9	5	3	2	4	2	2	3	3	4	2	1
HOM001616	3	3	2	2	2	4	1	8	2	4	2	2	2	2	2	2	3	2	1
HOM001621	2	2	5	2	4	7	1	6	5	2	3	5	3	2	3	3	5	2	1
HOM001622	3	3	3	4	3	6	3	10	4	0	2	3	3	4	3	3	2	3	1
HOM001626	3	4	3	3	2	9	4	7	4	2	3	7	3	3	3	3	3	6	5
HOM001629	3	3	3	4	4	9	4	7	3	4	3	2	2	2	2	5	2	4	2
HOM001635	3	3	2	2	4	8	2	6	2	4	4	4	4	3	4	2	3	4	3
HOM001645	3	4	3	2	1	7	2	4	3	6	6	3	3	3	2	1	3	3	2
HOM001647	3	4	3	3	3	5	2	5	4	2	3	3	3	3	3	3	3	3	2
HOM001648	2	2	4	3	3	9	2	4	4	4	5	4	2	4	3	3	3	5	3
HOM001649	3	4	3	2	3	7	3	7	5	3	2	6	4	5	3	2	7	2	1
HOM001650	3	2	2	1	3	7	7	4	2	3	2	2	3	2	2	2	5	3	1
HOM001651	3	3	6	2	2	8	2	6	4	2	5	4	1	6	2	2	8	3	2
HOM001652	3	3	2	3	3	8	4	7	5	4	2	4	3	2	3	6	3	5	4
HOM001655	2	3	3	3	1	4	2	5	6	0	3	4	2	2	3	6	3	4	3
HOM001657	3	3	3	2	3	4	5	10	3	5	3	4	2	3	2	2	3	4	2
HOM001662	1	1	3	3	3	6	5	3	2	4	4	3	5	3	2	2	4	3	1
HOM001664	4	4	4	2	2	9	1	4	4	5	5	2	2	5	2	3	8	5	4
HOM001668	3	3	3	4	0	3	3	1	3	2	3	8	3	4	3	2	5	2	1
HOM001669	3	3	2	4	1	4	4	10	4	3	3	3	2	3	4	2	3	2	1
HOM001671	4	4	2	1	4	8	4	7	6	3	2	5	4	3	3	3	3	3	2
HOM001677	4	3	3	1	3	5	3	12	3	1	3	5	2	3	3	2	1	2	1
HOM001680	4	2	4	2	2	5	4	5	6	2	4	4	3	4	3	5	4	3	2
HOM001684	5	4	2	2	4	7	2	8	3	3	2	4	1	2	4	4	2	2	1
HOM001685	4	4	2	5	3	5	4	7	3	2	3	3	2	2	2	3	2	3	2
HOM001687	4	4	4	2	2	6	1	4	3	4	4	4	2	5	2	2	7	3	2
HOM001688	4	4	0	3	4	10	4	13	6	4	0	6	3	0	3	3	1	7	5
HOM001692	1	1	3	1	2	7	7	6	3	12	4	2	1	4	1	1	3	6	2
HOM001696	3	3	3	3	1	8	2	2	2	2	3	2	2	10	3	2	4	3	2
HOM001700	3	2	1	2	2	8	9	9	3	5	1	4	2	2	2	5	2	2	1
HOM001710	2	4	3	4	3	8	3	4	6	5	2	6	3	4	4	1	4	5	4
HOM001712	3	3	3	4	3	6	3	8	6	2	3	6	3	3	3	3	3	4	3
HOM001714	6	4	2	2	2	7	4	8	3	1	2	4	2	3	2	4	7	3	1
HOM001717	3	3	2	2	5	6	3	7	5	2	2	6	3	1	4	2	5	2	1
HOM001718	3	3	3	3	2	4	1	18	5	2	3	4	3	3	2	2	2	3	2
HOM001721	3	2	2	4	4	4	6	6	3	5	2	3	4	2	3	3	2	2	1
HOM001723	5	3	3	2	4	6	0	8	3	2	3	4	2	3	2	3	4	2	1
HOM001726	8	3	2	2	2	4	5	10	4	2	1	5	2	2	1	1	4	2	1
HOM001732	4	4	3	3	3	8	2	6	4	6	3	5	3	3	3	3	2	5	4
HOM001737	4	4	2	3	2	4	2	4	3	2	3	4	2	3	2	6	8	5	3
HOM001746	2	2	5	2	2	7	2	8	4	2	3	5	2	2	2	3	7	6	4
HOM001753	2	2	2	3	2	7	4	5	4	2	2	5	5	1	3	3	4	3	2
HOM001761	3	4	1	3	3	5	11	7	4	3	2	4	3	1	4	3	1	3	2
HOM001763	3	3	3	3	4	4	1	7	5	0	3	4	3	3	3	2	5	2	1
HOM001764	3	4	2	4	2	5	5	9	4	1	2	2	2	2	3	2	2	3	2
HOM001765	7	5	2	3	3	6	0	9	3	2	2	7	5	2	2	3	2	3	1
HOM001768	3	3	1	3	2	5	5	13	3	2	2	5	3	1	3	6	1	2	1
HOM001769	3	3	2	3	1	4	4	3	4	2	2	8	4	2	2	3	3	2	1
HOM001770	5	3	2	2	2	4	8	8	3	6	1	3	2	1	2	3	3	2	1
HOM001774	2	2	4	2	3	5	4	5	4	3	4	4	3	5	2	3	5	3	1
HOM001776	4	4	2	0	2	6	1	7	4	6	3	4	2	2	3	2	4	3	2
HOM001781	7	7	2	3	5	6	1	8	5	1	2	4	3	2	3	3	2	4	3
HOM001792	3	2	0	2	4	5	2	9	6	4	0	9	3	6	2	4	3	4	2
HOM001794	2	2	2	2	2	4	4	6	4	14	2	5	2	5	2	2	2	2	1
HOM001798	2	2	4	2	8	6	5	5	2	1	3	2	3	4	4	1	2	2	1
HOM001801	3	3	2	3	2	6	2	2	4	2	4	5	2	2	3	3	4	8	6
HOM001802	4	4	3	2	2	8	2	3	4	4	3	4	2	3	3	5	5	4	3
HOM001812	3	3	2	2	2	9	8	4	2	7	2	4	2	3	2	2	3	2	1
HOM001817	6	6	1	3	4	8	4	6	5	1	1	9	3	1	3	2	1	4	3
HOM001819	6	3	3	2	2	5	2	5	4	4	3	3	2	3	3	3	3	2	1
HOM001827	2	2	2	2	2	4	5	7	3	2	3	5	2	2	2	2	5	3	1
HOM001832	4	4	4	2	4	7	1	5	4	1	5	4	2	4	2	1	7	3	1
HOM001863	4	3	1	3	2	8	5	10	3	3	1	5	3	1	3	3	1	4	3
HOM001866	3	4	3	1	2	9	3	6	4	3	3	4	2	1	2	2	8	2	1
HOM001867	4	3	3	2	4	7	5	6	3	3	2	4	2	0	2	4	3	3	1
HOM001871	2	2	2	2	3	12	1	5	4	2	5	4	2	4	3	4	2	2	1
HOM001874	3	2	3	2	1	2	2	5	2	6	5	3	1	6	2	3	3	2	1
HOM001883	3	5	0	3	3	5	4	7	5	1	3	5	4	2	4	4	0	4	3
HOM001889	3	3	3	1	2	4	2	11	3	1	3	3	3	3	2	2	3	2	1
HOM001892	3	4	2	3	3	6	5	5	4	2	2	4	2	1	3	2	3	3	2
HOM001893	5	3	2	2	1	3	2	13	3	0	2	2	2	1	2	3	4	2	1
HOM001895	2	2	2	3	2	6	1	8	3	1	3	6	2	4	3	3	5	2	1
HOM001902	3	3	3	2	4	7	1	5	4	5	4	3	1	0	3	2	3	3	2
HOM001905	2	2	1	2	2	4	2	3	8	0	3	6	2	1	6	3	2	2	1
HOM001910	4	4	2	6	2	3	2	1	3	3	2	4	2	3	2	3	2	3	2
HOM001913	3	3	4	2	3	7	2	1	4	2	4	6	2	3	6	3	4	5	3
HOM001914	4	2	3	2	2	3	2	8	3	4	2	3	2	3	3	2	3	2	1
HOM001916	3	3	3	1	2	8	1	4	7	4	3	6	2	5	3	1	6	3	2
HOM001922	2	2	3	2	2	10	2	4	4	3	3	3	2	3	2	2	12	6	4
HOM001927	3	2	2	3	3	8	2	3	4	4	2	4	3	2	4	3	4	2	1
HOM001930	3	3	2	2	5	5	2	3	4	2	2	3	2	2	2	2	3	3	2
HOM001933	2	2	2	5	3	4	3	11	2	1	3	4	2	2	2	4	5	3	2
HOM001940	2	2	3	2	2	5	4	9	3	3	0	3	3	3	2	2	3	2	1
HOM001942	4	4	4	1	2	6	1	4	2	1	4	3	3	2	3	4	3	3	2
HOM001947	3	3	4	2	2	7	3	2	3	0	4	4	4	2	2	4	4	4	2
HOM001951	13	11	0	1	7	5	2	4	3	4	0	3	2	0	8	0	0	3	2
HOM001959	2	2	2	2	1	2	2	12	1	2	2	2	2	3	3	2	2	2	1
HOM001964	4	3	3	2	3	8	4	3	4	3	3	4	2	3	2	2	3	3	2
HOM001965	5	4	2	1	2	5	1	4	3	1	3	3	2	4	3	2	3	4	3
HOM001966	4	4	2	3	6	5	5	2	4	3	2	6	5	2	3	3	3	4	3
HOM001973	8	5	3	2	2	4	1	3	7	1	3	2	2	3	4	2	4	2	1
HOM001976	4	3	4	2	3	6	1	4	3	1	4	4	2	3	2	2	4	2	1
HOM001977	7	7	0	3	2	13	2	6	6	2	0	5	3	0	3	4	0	5	3
HOM001978	4	4	2	2	4	4	4	7	4	3	2	3	3	2	2	1	2	2	1
HOM001980	3	2	1	3	1	6	2	4	2	3	2	4	1	6	2	3	4	2	1
HOM001982	1	1	2	2	3	4	2	4	3	3	2	3	2	2	3	2	3	2	1
HOM001986	3	3	2	1	2	4	2	5	3	2	2	5	2	2	2	3	6	2	1
HOM001987	5	2	2	1	3	7	4	4	5	4	2	5	3	3	2	2	3	2	1
HOM001991	3	3	3	2	3	4	0	16	3	2	1	3	3	1	3	2	0	2	1
HOM001993	2	2	3	3	2	4	0	4	2	4	2	3	2	3	3	4	2	3	2
HOM001994	2	2	3	2	2	4	5	3	3	0	3	3	4	3	2	2	2	2	1
HOM002004	2	2	2	3	3	4	2	10	4	2	3	3	3	2	3	3	3	3	2
HOM002005	2	2	2	3	2	7	1	6	2	3	3	4	2	5	2	2	5	2	1
HOM002006	3	2	3	1	3	5	2	8	3	2	2	3	2	2	2	4	3	5	4
HOM002009	2	2	1	4	1	4	3	4	3	1	2	2	5	3	3	4	4	2	1
HOM002014	3	4	2	2	3	6	2	2	4	1	2	5	2	2	2	4	4	3	2
HOM002019	2	2	2	2	2	4	1	4	2	4	2	4	2	4	4	2	2	2	1
HOM002039	3	1	2	2	1	7	5	3	4	2	2	6	2	3	2	2	2	3	2
[truncated: 294 more rows]

## Sheet: s.rexii.decrease
	AL	AT	BD	CP	FV	GM	LJ	MD	ME	MT	OS	PT	RC	SB	SM	TC	VV	ZM	Sr_reclustering	Sr_oases			AL	AT	BD	CP	FV	GM	LJ	MD	ME	MT	OS	PT	RC	SB	SM	TC	VV	ZM
[truncated: 591 more rows]
